# Supplementary material for: A comparative genome analysis of gene expression reveals different regulatory mechanisms between mouse and human embryo pre-implantation development
Source: Reprod Biol Endocrinol. 2010 May 11;8:41. doi: 10.1186/1477-7827-8-41 (PMC2876170; doi:10.1186/1477-7827-8-41)
Supplement: Additional file 1 — The list of mouse significantly regulated genes in each stage comparison. The data provided represent the list of mouse significantly regulated genes in each stage comparison, including from 1-cell to 2-cell (1v2); from 2-cell to 4-cell (2v4); from 4-cell to 8-cell (4v8); from 8-cell to Morula (8 vM); from Morula to Blastocyst (MvB), and containing the information of probe set IDs, Fold change, regulation type (down or up), gene symbols and gene titles. [file 1477-7827-8-41-S1.XLSX]

## Sheet: mouse 1v2
The regulated genes from 1-cell to 2-cell stage of mouse
Probe Set ID	Fold change([1] vs [2])	Regulation([1] vs [2])	Gene Symbol	Gene Title
AFFX-TransRecMur/X57349_3_at	9.23854	down	Tfrc	transferrin receptor
AFFX-MURINE_B2_at	2.12816	down
1460634_at	2.03575	down	Ralgds	ral guanine nucleotide dissociation stimulator
1460636_at	2.1463	down	Map2k2	mitogen-activated protein kinase kinase 2
1415739_at	3.18019	down	Rbm42	RNA binding motif protein 42
1415676_a_at	4.6332	down	Psmb5	proteasome (prosome
1415741_at	2.6965	down	Tmem165	transmembrane protein 165
1415744_at	10.9922	down	H2-Ke2	H2-K region expressed gene 2
1415678_at	2.08249	down	Ppm1a	protein phosphatase 1A
1415681_at	5.56842	down	Mrpl43	mitochondrial ribosomal protein L43
1415683_at	2.75522	down	Nmt1	N-myristoyltransferase 1
1415720_s_at	2.35173	down	Mad2l1bp	MAD2L1 binding protein
1415687_a_at	3.96428	down	Psap	prosaposin
1460680_a_at	6.16929	down	LOC100044627 /// Rpl23	similar to HL23 ribosomal protein /// ribosomal protein L23
1415701_x_at	5.74419	down	Rpl23	ribosomal protein L23
1460671_at	5.28112	down	Gpx1	glutathione peroxidase 1
1415703_at	3.39001	down	Huwe1	HECT
1460733_at	2.272	down	Unc119b	unc-119 homolog B (C. elegans)
1460688_s_at	9.67268	down	Unc119b	unc-119 homolog B (C. elegans)
1415715_at	4.5345	down	Tmem129	transmembrane protein 129
1415716_a_at	17.6555	down	Rps27	ribosomal protein S27
1460701_a_at	2.80621	down	Mrpl52	mitochondrial ribosomal protein L52
1415763_a_at	3.25675	down	2510006D16Rik	RIKEN cDNA 2510006D16 gene
1415764_at	6.03159	down	Zc3h11a	zinc finger CCCH type containing 11A
1460704_at	3.81676	down	Rfng	RFNG O-fucosylpeptide 3-beta-N-acetylglucosaminyltransferase
1415733_a_at	5.69646	down	Tomm5	translocase of outer mitochondrial membrane 5 homolog (yeast)
1460711_at	2.2104	down	Dnajc21	DnaJ (Hsp40) homolog
1415772_at	2.28964	down	Ncl	nucleolin
1415802_at	3.41321	down	Slc16a1	solute carrier family 16 (monocarboxylic acid transporters)
1415828_a_at	7.84929	down	Serp1	stress-associated endoplasmic reticulum protein 1
1451310_a_at	55.0596	down	Ctsl	cathepsin L
1415833_x_at	13.2106	down	OTTMUSG00000016246 /// Rps29	predicted gene
1448109_a_at	15.8421	down	Rpl26	ribosomal protein L26
1415846_a_at	2.50503	down	Ldhc	lactate dehydrogenase C
1415851_a_at	45.1889	down	Impdh2	inosine 5'-phosphate dehydrogenase 2
1415852_at	36.6237	down	Impdh2	inosine 5'-phosphate dehydrogenase 2
1415858_at	11.746	down	Eif3c	eukaryotic translation initiation factor 3
1415867_at	2.95892	down	Cct4	chaperonin containing Tcp1
1448122_at	3.87606	down	Tcp1	t-complex protein 1
1415876_a_at	21.1666	down	ENSMUSG00000059775 /// LOC100047845 /// Rps26	predicted gene
1415879_a_at	2.93248	down	Rplp2	ribosomal protein
1448128_at	13.7318	down	Ctsa	cathepsin A
1448131_at	2.40934	down	Mfn2	mitofusin 2
1459986_a_at	8.78354	down	100040123 /// Rps17	predicted gene
1455662_x_at	10.1192	down	Rps17	ribosomal protein S17
1415914_at	3.62641	down	Hnrnpab	heterogeneous nuclear ribonucleoprotein A/B
1448144_at	2.20052	down	Hnrnpab	heterogeneous nuclear ribonucleoprotein A/B
1448145_at	2.81562	down	Wwp2	WW domain containing E3 ubiquitin protein ligase 2
1415920_at	2.92244	down	Cstf2t	cleavage stimulation factor
1415930_a_at	132.966	down	Map1lc3b	microtubule-associated protein 1 light chain 3 beta
1448157_s_at	2.20993	down	100041509 /// ENSMUSG00000058443 /// LOC100048223 /// LOC100048462 /// OTTMUSG00000015005 /// Rpl10	predicted gene
1427720_a_at	3.25878	down	Rrp1	ribosomal RNA processing 1 homolog (S. cerevisiae)
1415962_at	7.45605	down	Eif3h	eukaryotic translation initiation factor 3
1415965_at	8.4851	down	Scd1	stearoyl-Coenzyme A desaturase 1
1426162_a_at	12.6112	down	Rpl7	ribosomal protein L7
1426163_x_at	6.05333	down	Rpl7	ribosomal protein L7
1415979_x_at	14.1255	down	Rpl7	ribosomal protein L7
1415987_at	3.14231	down	Hdlbp	high density lipoprotein (HDL) binding protein
1415993_at	4.19921	down	Sqle	squalene epoxidase
1438761_a_at	2.66477	down	EG627245 /// EG666231 /// EG668343 /// LOC677259 /// Odc1	predicted gene
1448166_a_at	2.74225	down	Psmb1	proteasome (prosome
1416015_s_at	2.52922	down	Abce1	ATP-binding cassette
1416018_at	2.31855	down	Dr1	down-regulator of transcription 1
1416019_at	26.3205	down	Dr1	down-regulator of transcription 1
1416020_a_at	2.55938	down	Atp5g1 /// ENSMUSG00000058357	ATP synthase
1448178_a_at	2.95347	down	Cct3	chaperonin containing Tcp1
1416024_x_at	2.11775	down	Cct3	chaperonin containing Tcp1
1448179_at	2.15477	down	Usmg5	upregulated during skeletal muscle growth 5
1416028_a_at	4.69438	down	Hn1	hematological and neurological expressed sequence 1
1416041_at	2.26415	down	Sgk1	serum/glucocorticoid regulated kinase 1
1416048_at	2.21579	down	Phc2	polyhomeotic-like 2 (Drosophila)
1416049_at	5.15168	down	Gldc	glycine decarboxylase
1416052_at	10.2305	down	Prps1	phosphoribosyl pyrophosphate synthetase 1
1448192_s_at	68.1182	down	AU021838 /// Prps1	expressed sequence AU021838 /// phosphoribosyl pyrophosphate synthetase 1
1448193_at	2.00202	down	5730403B10Rik	RIKEN cDNA 5730403B10 gene
1416054_at	8.57252	down	Rps5	ribosomal protein S5
1416056_a_at	5.46976	down	Ndufb11	NADH dehydrogenase (ubiquinone) 1 beta subcomplex
1416057_at	2.46955	down	Ndufb11	NADH dehydrogenase (ubiquinone) 1 beta subcomplex
1448195_at	4.07138	down	Taf5l	TAF5-like RNA polymerase II
1416064_a_at	2.59095	down	Hspa5	heat shock protein 5
1416065_a_at	81.3664	down	Ankrd10	ankyrin repeat domain 10
1448199_at	35.9424	down	Ankrd10	ankyrin repeat domain 10
1448202_x_at	2.58517	down	LOC100046650 /// LOC675389 /// Prelid1	similar to PRELI domain containing 1 /// similar to Preli /// PRELI domain containing 1
1416070_a_at	3.26175	down	Ddx18	DEAD (Asp-Glu-Ala-Asp) box polypeptide 18
1416074_a_at	6.04813	down	ENSMUSG00000058905 /// OTTMUSG00000021838 /// Rpl28	predicted gene
1416079_a_at	2.21259	down	Arpc1a	actin related protein 2/3 complex
1416082_at	4.09613	down	Rab1	RAB1
1448210_at	3.41427	down	Rab1	RAB1
1416084_at	2.69764	down	LOC100047896 /// Zfand5	similar to zinc finger protein ZNF216 /// zinc finger
1416085_s_at	7.41545	down	LOC100047896 /// Zfand5	similar to zinc finger protein ZNF216 /// zinc finger
1416088_a_at	5.28471	down	LOC100046223 /// Rps15	similar to insulinoma protein (rig) /// ribosomal protein S15
1416089_at	2.13881	down	Rps15	ribosomal protein S15
1416090_at	2.02381	down	LOC100044400 /// Pdhb	similar to pyruvate dehydrogenase (lipoamide) beta /// pyruvate dehydrogenase (lipoamide) beta
1416093_a_at	2.89836	down	Mrpl20	mitochondrial ribosomal protein L20
1448217_a_at	6.19672	down	EG621100 /// EG622236 /// OTTMUSG00000001643 /// Rpl27	predicted gene
1416106_at	3.78986	down	Kti12	KTI12 homolog
1448221_at	2.64976	down	Bat1a	HLA-B-associated transcript 1A
1416120_at	3.65175	down	Rrm2	ribonucleotide reductase M2
1448230_at	3.12536	down	Usp10	ubiquitin specific peptidase 10
1416135_at	2.20417	down	Apex1	apurinic/apyrimidinic endonuclease 1
1427382_a_at	2.85084	down	Suv39h1	suppressor of variegation 3-9 homolog 1 (Drosophila)
1416141_a_at	7.64823	down	OTTMUSG00000013244 /// Rps6	predicted gene
1434377_x_at	9.45001	down	OTTMUSG00000013244 /// Rps6	predicted gene
1416143_at	6.40915	down	Atp5j /// LOC674583	ATP synthase
1416146_at	3.54173	down	Hspa4	heat shock protein 4
1460175_at	4.38294	down	LOC100046668 /// OTTMUSG00000022083 /// Rps23	similar to yeast ribosomal protein S28 homologue /// predicted gene
1416162_at	3.98393	down	Rad21	RAD21 homolog (S. pombe)
1416166_a_at	5.81638	down	Prdx4	peroxiredoxin 4
1416167_at	7.46559	down	Prdx4	peroxiredoxin 4
1416171_at	2.55651	down	2310037I24Rik	RIKEN cDNA 2310037I24 gene
1435324_x_at	2.3078	down	ENSMUSG00000060128 /// Hmg1l1 /// Hmgb1 /// LOC100046019 /// LOC637733 /// OTTMUSG00000020977	predicted gene
1416177_at	7.70171	down	Rbmxrt	RNA binding motif protein
1416181_at	3.63653	down	Mesdc2	mesoderm development candidate 2
1448241_at	2.42113	down	Gm2a	GM2 ganglioside activator protein
1448245_at	18.2459	down	LOC100045332 /// LOC636901 /// Rpsa	similar to 37kDa oncofetal antigen /// similar to 40S ribosomal protein SA (p40) (34/67 kDa laminin receptor) /// ribosomal protein SA
1448246_at	10.8275	down	Hdac1	histone deacetylase 1
1416197_at	3.97626	down	Snrpc	U1 small nuclear ribonucleoprotein C
1416205_at	2.58574	down	Glb1	galactosidase
1416210_at	3.20142	down	Imp3	IMP3
1416217_a_at	6.16036	down	100042986 /// OTTMUSG00000015874 /// Rpl37a	predicted gene
1416219_at	8.57736	down	Rpl19	ribosomal protein L19
1416223_at	2.10096	down	Sh3bp5l	SH3 binding domain protein 5 like
1416224_at	4.21348	down	Zbtb17	zinc finger and BTB domain containing 17
1416228_at	2.65638	down	Pin1	protein (peptidyl-prolyl cis/trans isomerase) NIMA-interacting 1
1416229_at	2.28793	down	Rfk	riboflavin kinase
1448263_a_at	13.4702	down	Cndp2	CNDP dipeptidase 2 (metallopeptidase M20 family)
1416234_at	2.20666	down	Lrrc59	leucine rich repeat containing 59
1416235_at	2.68596	down	Lrrc59	leucine rich repeat containing 59
1416243_a_at	2.1123	down	100038991 /// 100043296 /// ENSMUSG00000069439 /// Rpl35	predicted gene
1434231_x_at	14.3402	down	100038991 /// Rpl35	predicted gene
1416245_at	2.10009	down	Aurkaip1	aurora kinase A interacting protein 1
1448271_a_at	11.2873	down	Ddx21	DEAD (Asp-Glu-Ala-Asp) box polypeptide 21
1416256_a_at	2.97169	down	Tubb5	tubulin
1448274_at	2.19706	down	C1qbp	complement component 1
1448276_at	2.26929	down	Tspan4	tetraspanin 4
1416276_a_at	9.62904	down	Rps4x	ribosomal protein S4
1416277_a_at	13.9601	down	Rplp1	ribosomal protein
1416281_at	8.49963	down	Wdr45l	Wdr45 like
1416283_at	6.14846	down	Gart	phosphoribosylglycinamide formyltransferase
1416284_at	2.09902	down	Mrpl28	mitochondrial ribosomal protein L28
1448284_a_at	3.52357	down	Ndufc1	NADH dehydrogenase (ubiquinone) 1
1448287_at	2.38345	down	Polr1d	polymerase (RNA) I polypeptide D
1416300_a_at	2.0283	down	Slc25a3	solute carrier family 25 (mitochondrial carrier
1460180_at	22.1976	down	Hexb	hexosaminidase B
1448302_at	6.88024	down	Kctd20	potassium channel tetramerisation domain containing 20
1416327_at	2.37117	down	Ufc1	ubiquitin-fold modifier conjugating enzyme 1
1416343_a_at	13.6746	down	Lamp2	lysosomal-associated membrane protein 2
1416344_at	8.84483	down	Lamp2	lysosomal-associated membrane protein 2
1416345_at	4.74753	down	ENSMUSG00000045455 /// Timm8a1	predicted gene
1416346_at	6.68508	down	ENSMUSG00000045455 /// Timm8a1	predicted gene
1431284_a_at	2.44786	down	Spns1	spinster homolog 1 (Drosophila)
1433507_a_at	4.05911	down	ENSMUSG00000066826 /// ENSMUSG00000069996 /// Hmgn2 /// LOC100044482	predicted gene
1416362_a_at	4.09151	down	Fkbp4	FK506 binding protein 4
1416382_at	58.5526	down	Ctsc	cathepsin C
1448314_at	6.07875	down	Cdc2a	cell division cycle 2 homolog A (S. pombe)
1416387_at	2.9094	down	Pip4k2c	phosphatidylinositol-5-phosphate 4-kinase
1416393_at	2.40109	down	Emg1	EMG1 nucleolar protein homolog (S. cerevisiae)
1416394_at	9.12302	down	Bag1	BCL2-associated athanogene 1
1416399_a_at	3.08828	down	Hmox2	heme oxygenase (decycling) 2
1448322_a_at	4.64769	down	Cox4i1	cytochrome c oxidase subunit IV isoform 1
1416404_s_at	2.42135	down	LOC100039355 /// Rps16	similar to Rps16 protein /// ribosomal protein S16
1448325_at	2.41941	down	Myd116	myeloid differentiation primary response gene 116
1416415_a_at	6.10473	down	H2afz	H2A histone family
1416417_a_at	4.52175	down	Ndufb7	NADH dehydrogenase (ubiquinone) 1 beta subcomplex
1416420_a_at	27.011	down	EG637379 /// ENSMUSG00000047965 /// ENSMUSG00000062456 /// ENSMUSG00000071269 /// Rpl9	predicted gene
1416428_at	2.09407	down	Thap11	THAP domain containing 11
1416432_at	2.23697	down	Pfkfb3	6-phosphofructo-2-kinase/fructose-2
1448336_at	2.48083	down	Drg1	developmentally regulated GTP binding protein 1
1416436_a_at	2.00122	down	Uqcc	ubiquinol-cytochrome c reductase complex chaperone
1416438_at	2.4013	down	Puf60	poly-U binding splicing factor 60
1416443_a_at	2.8747	down	Sae1	SUMO1 activating enzyme subunit 1
1416448_at	2.35694	down	Itpa	inosine triphosphatase (nucleoside triphosphate pyrophosphatase)
1416453_x_at	4.13094	down	EG432865 /// EG665281 /// EG668406 /// ENSMUSG00000059333 /// LOC100038978 /// LOC100039828 /// LOC676277 /// OTTMUSG00000006191 /// OTTMUSG00000018594 /// OTTMUSG00000027340 /// Rps12	predicted gene
1448347_a_at	2.29334	down	Caprin1	cell cycle associated protein 1
1416472_at	12.9938	down	Syap1	synapse associated protein 1
1416475_at	2.90504	down	ENSMUSG00000037096 /// Ube2d2	predicted gene
1416478_a_at	16.261	down	Mdh2	malate dehydrogenase 2
1416480_a_at	3.7053	down	ENSMUSG00000044330 /// Higd1a /// LOC100045763	predicted gene
1416487_a_at	2.44083	down	Yap1	yes-associated protein 1
1416489_at	2.07672	down	Pi4k2b	phosphatidylinositol 4-kinase type 2 beta
1416490_at	2.36387	down	LOC100047810 /// Tmed6	similar to transmembrane emp24 protein transport domain containing 6 /// transmembrane emp24 protein transport domain containing 6
1416492_at	14.9496	down	Ccne1	cyclin E1
1426393_a_at	7.23705	down	Sdf4	stromal cell derived factor 4
1416497_at	2.08753	down	Pdia4	protein disulfide isomerase associated 4
1416500_at	2.58926	down	Sacm1l	SAC1 (suppressor of actin mutations 1
1460186_at	2.35704	down	Tm9sf3	transmembrane 9 superfamily member 3
1416510_at	2.36552	down	Mrpl4	mitochondrial ribosomal protein L4
1416514_a_at	7.80998	down	Fscn1	fascin homolog 1
1416519_at	9.56388	down	LOC100048508 /// OTTMUSG00000012957 /// Rpl36	similar to Rpl36 protein /// predicted gene
1416520_x_at	9.95604	down	100043718 /// LOC100048508 /// OTTMUSG00000012957 /// Rpl36	predicted gene
1416533_at	2.74548	down	Egln2	EGL nine homolog 2 (C. elegans)
1416534_at	2.68572	down	Dpf2	D4
1416545_at	2.83685	down	Zdhhc7	zinc finger
1416546_a_at	7.4414	down	Rpl6	ribosomal protein L6
1416552_at	4.08546	down	Dppa5a	developmental pluripotency associated 5A
1416555_at	11.5249	down	Ei24	etoposide induced 2.4 mRNA
1416574_at	15.0987	down	Tox4	TOX high mobility group box family member 4
1416576_at	2.40168	down	Socs3	suppressor of cytokine signaling 3
1416579_a_at	7.40405	down	Epcam	epithelial cell adhesion molecule
1430713_s_at	3.89201	down	Ndufa13	NADH dehydrogenase (ubiquinone) 1 alpha subcomplex
1448389_at	2.73174	down	Wdr5	WD repeat domain 5
1416585_at	10.7722	down	Ruvbl1	RuvB-like protein 1
1416590_a_at	3.96776	down	Rab34	RAB34
1416591_at	2.07999	down	Rab34	RAB34
1416598_at	3.00775	down	Glis2	GLIS family zinc finger 2
1416603_at	6.42969	down	EG627737 /// mCG_130059 /// Rpl22	predicted gene
1416604_at	2.907	down	Cyc1	cytochrome c-1
1416606_s_at	18.1487	down	Nhp2	NHP2 ribonucleoprotein homolog (yeast)
1416608_a_at	2.05906	down	BC004004	cDNA sequence BC004004
1416616_s_at	9.14879	down	Clpp	caseinolytic peptidase
1416624_a_at	17.1732	down	OTTMUSG00000004411 /// Uba52	predicted gene
1452701_x_at	14.3659	down	OTTMUSG00000004411 /// Uba52	predicted gene
1416628_at	4.58831	down	0610006I08Rik	RIKEN cDNA 0610006I08 gene
1448412_a_at	3.61594	down	Tsc22d4	TSC22 domain family
1448413_at	9.62165	down	2410016O06Rik	RIKEN cDNA 2410016O06 gene
1416651_at	2.13205	down	Znhit2	zinc finger
1448422_at	3.03067	down	Tmed4	transmembrane emp24 protein transport domain containing 4
1448425_at	11.6222	down	Eif3a	eukaryotic translation initiation factor 3
1416667_at	3.05994	down	Ebp	phenylalkylamine Ca2+ antagonist (emopamil) binding protein
1416685_s_at	5.00125	down	Fbl /// LOC100044829	fibrillarin /// similar to Fibrillarin
1416692_at	6.62666	down	Coil	coilin
1448442_a_at	3.14324	down	OTTMUSG00000014672 /// Psma3	predicted gene
1416703_at	4.37535	down	Mapk14	mitogen-activated protein kinase 14
1416704_at	2.01721	down	Mapk14	mitogen-activated protein kinase 14
1448448_a_at	2.11672	down	Chkb	choline kinase beta
1448449_at	2.1096	down	Ripk3	receptor-interacting serine-threonine kinase 3
1438723_a_at	4.19883	down	Rps10	ribosomal protein S10
1456497_x_at	5.48458	down	Rps10	ribosomal protein S10
1448454_at	3.68924	down	Sfrs6	splicing factor
1448455_at	2.44783	down	Cln8	ceroid-lipofuscinosis
1416730_at	2.9932	down	Rcl1	RNA terminal phosphate cyclase-like 1
1416739_a_at	2.18464	down	Brap	BRCA1 associated protein
1416742_at	2.48081	down	Cfdp1	craniofacial development protein 1
1416743_at	3.3412	down	LOC640502 /// Uap1	similar to UDP-N-acetylhexosamine pyrophosphorylase /// UDP-N-acetylglucosamine pyrophosphorylase 1
1416747_at	4.98372	down	Mfsd5	major facilitator superfamily domain containing 5
1416751_a_at	7.18171	down	Ddx20	DEAD (Asp-Glu-Ala-Asp) box polypeptide 20
1416788_a_at	13.8602	down	Idh3g	isocitrate dehydrogenase 3 (NAD+)
1416789_at	5.08419	down	Idh3g	isocitrate dehydrogenase 3 (NAD+)
1416791_a_at	4.57261	down	Nxf1	nuclear RNA export factor 1 homolog (S. cerevisiae)
1416792_at	6.78625	down	Ppm1g	protein phosphatase 1G (formerly 2C)
1416807_at	2.05902	down	100040331 /// EG624713 /// EG666243 /// EG667549 /// LOC100048339 /// OTTMUSG00000005111 /// OTTMUSG00000009278 /// Rpl36a /// Rpl36al	predicted gene
1448480_at	2.49222	down	Nip7	nuclear import 7 homolog (S. cerevisiae)
1416852_a_at	2.48618	down	Ncdn	neurochondrin
1448492_a_at	4.16448	down	Psmd12	proteasome (prosome
1416854_at	42.8559	down	Slc34a2	solute carrier family 34 (sodium phosphate)
1416858_a_at	12.0817	down	Fkbp3	FK506 binding protein 3
1416859_at	5.37779	down	Fkbp3	FK506 binding protein 3
1416864_at	10.3133	down	Surf6	surfeit gene 6
1448497_at	2.19099	down	Ercc3	excision repair cross-complementing rodent repair deficiency
1416874_a_at	2.78177	down	Paf1	Paf1
1416877_a_at	22.2995	down	Mrpl51	mitochondrial ribosomal protein L51
1448503_at	24.2838	down	Mcl1	myeloid cell leukemia sequence 1
1416880_at	2.16183	down	Mcl1	myeloid cell leukemia sequence 1
1416881_at	11.8887	down	Mcl1	myeloid cell leukemia sequence 1
1448504_a_at	74.6893	down	Cbx3 /// LOC633016	chromobox homolog 3 (Drosophila HP1 gamma) /// similar to chromobox homolog 3
1416884_at	16.3844	down	Cbx3	chromobox homolog 3 (Drosophila HP1 gamma)
1416885_at	3.93171	down	1110038F14Rik	RIKEN cDNA 1110038F14 gene
1448505_at	5.56884	down	C1d	nuclear DNA binding protein
1416890_at	6.50513	down	Wdr74	WD repeat domain 74
1448513_a_at	2.79956	down	Npc2	Niemann Pick type C2
1416901_at	2.14689	down	Npc2	Niemann Pick type C2
1416910_at	7.52184	down	Dnajc15	DnaJ (Hsp40) homolog
1416911_a_at	3.72629	down	Akirin1	akirin 1
1416912_at	2.20994	down	Akirin1	akirin 1
1448517_at	4.12025	down	Timm22	translocase of inner mitochondrial membrane 22 homolog (yeast)
1448520_at	2.22841	down	Dclre1b	DNA cross-link repair 1B
1416917_at	3.75555	down	1700123O20Rik	RIKEN cDNA 1700123O20 gene
1416937_at	2.3364	down	Gabarap	gamma-aminobutyric acid receptor associated protein
1448533_at	2.68134	down	Tbcb	tubulin folding cofactor B
1416941_s_at	7.17836	down	Eif4h	eukaryotic translation initiation factor 4H
1451521_x_at	4.86891	down	Eif4h	eukaryotic translation initiation factor 4H
1416951_a_at	2.86625	down	Atp6v1d	ATPase
1416952_at	2.09565	down	Atp6v1d	ATPase
1416973_at	5.72472	down	EG434401 /// Nhp2l1	predicted gene
1416975_at	4.98181	down	Stam2	signal transducing adaptor molecule (SH3 domain and ITAM motif) 2
1419809_s_at	3.10568	down	Cog4	component of oligomeric golgi complex 4
1448537_at	4.1343	down	Ttc1	tetratricopeptide repeat domain 1
1416998_at	6.0197	down	Rrs1	RRS1 ribosome biogenesis regulator homolog (S. cerevisiae)
1448540_a_at	6.58537	down	0610012G03Rik	RIKEN cDNA 0610012G03 gene
1417002_at	3.87924	down	0610012G03Rik	RIKEN cDNA 0610012G03 gene
1417016_at	2.12929	down	LOC100047833 /// Mapkapk5	similar to MK-5 type 2 /// MAP kinase-activated protein kinase 5
1417035_at	6.0199	down	Sac3d1	SAC3 domain containing 1
1417041_at	2.86042	down	Polr1c	polymerase (RNA) I polypeptide C
1417045_at	2.60247	down	Bid	BH3 interacting domain death agonist
1417054_a_at	4.74946	down	0610009D07Rik	RIKEN cDNA 0610009D07 gene
1417068_a_at	5.67242	down	Ptpn1	protein tyrosine phosphatase
1417075_at	2.27449	down	2010309E21Rik	RIKEN cDNA 2010309E21 gene
1448580_at	3.77418	down	Glg1	golgi apparatus protein 1
1417088_at	3.46593	down	Zfp346	zinc finger protein 346
1417096_at	3.58274	down	Rrp15	ribosomal RNA processing 15 homolog (S. cerevisiae)
1448592_at	2.15224	down	Crtap	cartilage associated protein
1417112_at	2.33085	down	Arl2bp	ADP-ribosylation factor-like 2 binding protein
1448595_a_at	6.72722	down	Bex1	brain expressed gene 1
1448597_at	6.39267	down	Cstf1	cleavage stimulation factor
1448604_at	9.26537	down	Uck2	uridine-cytidine kinase 2
1417138_s_at	3.18905	down	Polr2e	polymerase (RNA) II (DNA directed) polypeptide E
1417190_at	2.68197	down	Nampt	nicotinamide phosphoribosyltransferase
1417191_at	47.8179	down	Dnajb9	DnaJ (Hsp40) homolog
1417192_at	2.8938	down	Tomm70a	translocase of outer mitochondrial membrane 70 homolog A (yeast)
1448610_a_at	2.41836	down	Sod2	superoxide dismutase 2
1417199_at	2.3504	down	Tmem183a	transmembrane protein 183A
1448619_at	2.56361	down	Dhcr7	7-dehydrocholesterol reductase
1448620_at	14.3395	down	Fcgr3	Fc receptor
1460201_a_at	13.3565	down	EG668829 /// Rpl24	predicted gene
1451943_a_at	2.08857	down	Ppm1a	protein phosphatase 1A
1417224_a_at	23.1978	down	Cd2bp2	CD2 antigen (cytoplasmic tail) binding protein 2
1448624_at	5.65751	down	Cd2bp2	CD2 antigen (cytoplasmic tail) binding protein 2
1417233_at	2.44902	down	Chchd4	coiled-coil-helix-coiled-coil-helix domain containing 4
1417252_at	2.31929	down	Nt5c	5'
1417269_at	5.10569	down	Cdk9	cyclin-dependent kinase 9 (CDC2-related kinase)
1448646_at	2.22887	down	Wdr12	WD repeat domain 12
1417299_at	2.62748	down	Nek2	NIMA (never in mitosis gene a)-related expressed kinase 2
1417306_at	2.00597	down	Tyk2	tyrosine kinase 2
1448666_s_at	3.85172	down	Tob2	transducer of ERBB2
1417315_at	2.99345	down	Gripap1	GRIP1 associated protein 1
1417316_at	3.31072	down	Them2	thioesterase superfamily member 2
1417317_s_at	6.87661	down	ENSMUSG00000067558 /// ENSMUSG00000067575 /// ENSMUSG00000068674 /// ENSMUSG00000070519 /// Ino80 /// LOC100044516 /// LOC100046034 /// LOC100048620 /// OTTMUSG00000015055 /// OTTMUSG00000021804 /// Rpl35a	predicted gene
1417320_at	2.69082	down	Grpel1	GrpE-like 1
1417324_at	2.68286	down	Mast2	microtubule associated serine/threonine kinase 2
1417339_a_at	5.34745	down	Dynll1 /// EG627788	dynein light chain LC8-type 1 /// predicted gene
1448682_at	3.44317	down	Dynll1	dynein light chain LC8-type 1
1417341_a_at	2.56162	down	Ppp1r2	protein phosphatase 1
1417364_at	4.71064	down	Eef1g /// LOC100047986	eukaryotic translation elongation factor 1 gamma /// similar to eukaryotic translation elongation factor 1 gamma
1417368_s_at	5.75383	down	Ndufa2	NADH dehydrogenase (ubiquinone) 1 alpha subcomplex
1417373_a_at	2.66353	down	Tuba4a	tubulin
1417385_at	3.29122	down	Npepps	aminopeptidase puromycin sensitive
1417390_at	7.77578	down	Gpn1	GPN-loop GTPase 1
1417394_at	7.13209	down	Klf4	Kruppel-like factor 4 (gut)
1417395_at	3.45541	down	Klf4	Kruppel-like factor 4 (gut)
1417403_at	2.82628	down	Elovl6	ELOVL family member 6
1417404_at	7.83913	down	Elovl6	ELOVL family member 6
1417406_at	7.05554	down	Sertad1	SERTA domain containing 1
1448693_at	2.64552	down	Gltpd1	glycolipid transfer protein domain containing 1
1417409_at	2.37627	down	Jun	Jun oncogene
1417417_a_at	3.84344	down	Cox6a1	cytochrome c oxidase
1417418_s_at	2.42003	down	Cox6a1 /// EG665806	cytochrome c oxidase
1448697_s_at	7.50067	down	100040331 /// LOC100048339 /// Rpl36a /// Rpl36al	predicted gene
1448702_at	2.04601	down	Hdhd2 /// Ier3ip1	haloacid dehalogenase-like hydrolase domain containing 2 /// immediate early response 3 interacting protein 1
1417425_at	3.48918	down	Prkrip1	Prkr interacting protein 1 (IL11 inducible)
1448703_at	4.00357	down	Lsm8	LSM8 homolog
1448704_s_at	151.508	down	H47	histocompatibility 47
1417432_a_at	2.24726	down	Gnb1	guanine nucleotide binding protein (G protein)
1417434_at	3.59626	down	Gpd2	glycerol phosphate dehydrogenase 2
1417451_a_at	3.62771	down	Ppia	peptidylprolyl isomerase A
1417452_a_at	2.8396	down	ENSMUSG00000050299 /// Fau	predicted gene
1448715_x_at	12.4934	down	100043821 /// Ccrn4l /// Cog6 /// LOC280487 /// Sgip1	predicted gene
1417463_a_at	3.94749	down	2400001E08Rik /// EG433216	RIKEN cDNA 2400001E08 gene /// predicted gene
1448722_s_at	3.1065	down	Ppcs	phosphopantothenoylcysteine synthetase
1431337_a_at	2.69928	down	1810055E12Rik	RIKEN cDNA 1810055E12 gene
1417490_at	6.69874	down	Ctsb	cathepsin B
1435151_a_at	13.1371	down	Rps3	ribosomal protein S3
1448736_a_at	2.52029	down	Hprt1	hypoxanthine guanine phosphoribosyl transferase 1
1435712_a_at	9.94552	down	ENSMUSG00000069117 /// LOC100047828 /// Rps18	predicted gene
1448739_x_at	2.88508	down	ENSMUSG00000069117 /// LOC100042388 /// LOC100047329 /// LOC100047828 /// OTTMUSG00000000655 /// Rps18	predicted gene
1417511_at	19.1771	down	Lyar	Ly1 antibody reactive clone
1417530_a_at	9.82413	down	Srp9	signal recognition particle 9
1417533_a_at	6.0463	down	Itgb5	integrin beta 5
1417534_at	3.42407	down	Itgb5	integrin beta 5
1460210_at	2.13202	down	Pkd1	polycystic kidney disease 1 homolog
1417583_a_at	4.05773	down	Utp3	UTP3
1417598_a_at	3.56269	down	Fxr1	fragile X mental retardation gene 1
1417606_a_at	3.40187	down	Calr	calreticulin
1433806_x_at	2.03132	down	Calr	calreticulin
1448770_a_at	2.14894	down	Atpif1	ATPase inhibitory factor 1
1448771_a_at	2.81222	down	Fth1	ferritin heavy chain 1
1417608_a_at	2.96349	down	Rpl13a	ribosomal protein L13a
1448772_at	9.18234	down	Ube2a	ubiquitin-conjugating enzyme E2A
1417615_a_at	2.47218	down	Rpl11	ribosomal protein L11
1417623_at	4.3147	down	Slc12a2	solute carrier family 12
1417646_a_at	20.0747	down	Snx5	sorting nexin 5
1448791_at	16.8348	down	LOC100048642 /// Snx5	similar to Snx5 protein /// sorting nexin 5
1417647_at	2.09389	down	Snx5	sorting nexin 5
1417657_s_at	2.28636	down	Dnajc2	DnaJ (Hsp40) homolog
1417665_a_at	5.29606	down	Cpsf1	cleavage and polyadenylation specific factor 1
1448802_at	17.4496	down	Nufip1	nuclear fragile X mental retardation protein interacting protein 1
1417675_a_at	5.09396	down	Mdn1	midasin homolog (yeast)
1417681_at	9.05073	down	Nudt21	nudix (nucleoside diphosphate linked moiety X)-type motif 21
1448808_a_at	112.633	down	Nme2	non-metastatic cells 2
1417683_at	2.28833	down	Diablo	diablo homolog (Drosophila)
1417698_at	11.5279	down	Gtf2f1	general transcription factor IIF
1417718_at	12.4025	down	Eif3g	eukaryotic translation initiation factor 3
1417724_at	5.60983	down	Thoc4	THO complex 4
1417725_a_at	3.26318	down	Sssca1	Sjogren's syndrome/scleroderma autoantigen 1 homolog (human)
1417726_at	2.37542	down	Sssca1	Sjogren's syndrome/scleroderma autoantigen 1 homolog (human)
1417727_at	4.50321	down	Sfrs9	splicing factor
1453107_s_at	3.1846	down	4933413G19Rik /// Foxm1 /// Pebp1	RIKEN cDNA 4933413G19 gene /// forkhead box M1 /// phosphatidylethanolamine binding protein 1
1448838_at	4.53854	down	Topors	topoisomerase I binding
1417762_a_at	6.28575	down	Rpl8	ribosomal protein L8
1417764_at	2.12017	down	LOC636537 /// Ssr1	similar to signal sequence receptor
1431177_a_at	16.1568	down	OTTMUSG00000022086 /// Rpl10a	predicted gene
1417773_at	5.47991	down	Nans	N-acetylneuraminic acid synthase (sialic acid synthase)
1417783_at	2.04961	down	Als2	amyotrophic lateral sclerosis 2 (juvenile) homolog (human)
1417800_at	3.09056	down	Parp2	poly (ADP-ribose) polymerase family
1448845_at	2.51252	down	Rpp25	ribonuclease P 25 subunit (human)
1448846_a_at	2.81356	down	433941 /// 622707 /// EG666642 /// ENSMUSG00000074516 /// LOC100044494 /// OTTMUSG00000007230 /// OTTMUSG00000014710 /// Rpl29	predicted gene
1436046_x_at	2.66613	down	100041859 /// 622707 /// EG666642 /// ENSMUSG00000074516 /// LOC100044494 /// OTTMUSG00000014710 /// OTTMUSG00000023237 /// Rpl29	predicted gene
1417815_a_at	2.58559	down	Serinc3	serine incorporator 3
1417817_a_at	4.05552	down	Wwtr1	WW domain containing transcription regulator 1
1417820_at	7.17751	down	Tor1b	torsin family 1
1448848_at	25.3119	down	Tor1b	torsin family 1
1448849_at	7.27366	down	Mrpl40	mitochondrial ribosomal protein L40
1417836_at	2.16747	down	Gpx7	glutathione peroxidase 7
1448858_at	2.31139	down	Ulk2	Unc-51 like kinase 2 (C. elegans)
1417868_a_at	2.47497	down	Ctsz	cathepsin Z
1417869_s_at	4.80523	down	Ctsz	cathepsin Z
1417870_x_at	2.40833	down	Ctsz	cathepsin Z
1417873_at	3.84026	down	Pwp1	PWP1 homolog (S. cerevisiae)
1448866_at	4.10883	down	Senp3	SUMO/sentrin specific peptidase 3
1448868_at	2.0924	down	Scand1	SCAN domain-containing 1
1417884_at	21.1114	down	Slc16a6	solute carrier family 16 (monocarboxylic acid transporters)
1417886_at	3.19505	down	1810009A15Rik /// LOC100048454	RIKEN cDNA 1810009A15 gene /// hypothetical protein LOC100048454
1417890_at	2.4225	down	Pdxp	pyridoxal (pyridoxine
1448879_at	3.31272	down	ENSMUSG00000064208 /// ENSMUSG00000074506 /// Ube2l3	predicted gene
1417919_at	2.7405	down	Ppp1r7	protein phosphatase 1
1417921_at	3.63015	down	2610029G23Rik	RIKEN cDNA 2610029G23 gene
1448890_at	2.42414	down	Klf2	Kruppel-like factor 2 (lung)
1417935_at	2.13948	down	Mkrn2	makorin
1448897_at	2.45421	down	Mkrn2	makorin
1417938_at	2.22675	down	Rad51ap1	RAD51 associated protein 1
1448899_s_at	6.20182	down	Rad51ap1	RAD51 associated protein 1
1448907_at	2.1125	down	Thop1	thimet oligopeptidase 1
1417964_at	4.8675	down	Ap3d1	adaptor-related protein complex 3
1417970_at	2.11702	down	Atp5s	ATP synthase
1417974_at	2.76859	down	Kpna4	karyopherin (importin) alpha 4
1460221_at	2.16428	down	ENSMUSG00000040078 /// LOC100048119 /// Ptges3	predicted gene
1418023_at	8.06713	down	Narg1	NMDA receptor-regulated gene 1
1418079_at	7.89542	down	Psme3	proteaseome (prosome
1418081_at	3.34679	down	Dnajc30	DnaJ (Hsp40) homolog
1448946_at	2.33774	down	Kif3c	kinesin family member 3C
1418090_at	3.30951	down	Plvap	plasmalemma vesicle associated protein
1448947_at	11.5854	down	2810004N23Rik /// Setd6	RIKEN cDNA 2810004N23 gene /// SET domain containing 6
1418115_s_at	6.99645	down	Ifrg15	interferon alpha responsive gene
1418119_at	9.515	down	Rbm8a	RNA binding motif protein 8a
1418124_at	4.2547	down	Tmem85	transmembrane protein 85
1448968_at	2.13424	down	Ubfd1	ubiquitin family domain containing 1
1418135_at	2.79666	down	Aff1	AF4/FMR2 family
1418137_at	2.86933	down	Mrp63	mitochondrial ribosomal protein 63
1448984_at	2.0899	down	Ercc4	excision repair cross-complementing rodent repair deficiency
1418170_a_at	2.56555	down	Zcchc14	zinc finger
1448990_a_at	2.50446	down	Myo1b	myosin IB
1448994_at	2.31076	down	Sp1	trans-acting transcription factor 1
1427689_a_at	2.68581	down	Tnip1	TNFAIP3 interacting protein 1
1418206_at	3.0395	down	Sdf2l1	stromal cell-derived factor 2-like 1
1418222_at	4.92791	down	2610024G14Rik	RIKEN cDNA 2610024G14 gene
1418226_at	3.43506	down	Orc2l	origin recognition complex
1418242_at	2.59684	down	Faf1	Fas-associated factor 1
1449004_at	2.25037	down	Mrpl46	mitochondrial ribosomal protein L46
1418248_at	6.27383	down	Gla	galactosidase
1418249_at	4.14342	down	Crcp	calcitonin gene-related peptide-receptor component protein
1432394_a_at	2.22782	down	Aatf	apoptosis antagonizing transcription factor
1418273_a_at	8.02796	down	677010 /// EG667779 /// OTTMUSG00000005566 /// Rpl30	predicted gene
1418300_a_at	8.11186	down	Mknk2	MAP kinase-interacting serine/threonine kinase 2
1454042_a_at	2.33234	down	Srpk1	serine/arginine-rich protein specific kinase 1
1418316_a_at	11.4262	down	LOC100047588 /// Mark3	similar to MAP/microtubule affinity-regulating kinase 3 /// MAP/microtubule affinity-regulating kinase 3
1418321_at	8.85745	down	Dci	dodecenoyl-Coenzyme A delta isomerase (3
1418323_at	4.59801	down	Fem1b	feminization 1 homolog b (C. elegans)
1418338_at	2.03913	down	Wdr33	WD repeat domain 33
1418344_at	2.00215	down	Tmem8	transmembrane protein 8 (five membrane-spanning domains)
1418355_at	3.80816	down	Nucb2	nucleobindin 2
1418362_at	2.65088	down	Zfp42	zinc finger protein 42
1418364_a_at	2.1386	down	EG665937 /// ENSMUSG00000062382 /// Ftl1 /// Ftl2	predicted gene
1449061_a_at	5.95768	down	Prim1	DNA primase
1418369_at	4.1993	down	Prim1	DNA primase
1418371_at	2.71085	down	Dynll2	dynein light chain LC8-type 2
1418372_at	7.15147	down	Adsl	adenylosuccinate lyase
1449064_at	2.02974	down	Tdh	L-threonine dehydrogenase
1449072_a_at	11.3418	down	N6amt2	N-6 adenine-specific DNA methyltransferase 2 (putative)
1418390_at	5.06644	down	Phf21a	PHD finger protein 21A
1449075_at	2.48727	down	Exdl2	exonuclease 3''-5'' domain-like 2
1418404_at	2.04558	down	Rad9	RAD9 homolog (S. pombe)
1418432_at	8.39088	down	Cab39	calcium binding protein 39
1418435_at	3.09762	down	Mkrn1	makorin
1418443_at	3.4319	down	Xpo1	exportin 1
1418444_a_at	3.99261	down	Gde1	glycerophosphodiester phosphodiesterase 1
1418458_at	9.69552	down	Anapc7	anaphase promoting complex subunit 7
1460234_at	4.2715	down	Wdr81	WD repeat domain 81
1418484_at	2.10792	down	Tekt2	tektin 2
1418488_s_at	3.31248	down	Ripk4	receptor-interacting serine-threonine kinase 4
1418496_at	2.49189	down	Foxa1 /// LOC100047556	forkhead box A1 /// similar to Hepatocyte nuclear factor 3-alpha (HNF-3A) (Forkhead box protein A1)
1449107_at	48.5269	down	Nudt4	nudix (nucleoside diphosphate linked moiety X)-type motif 4
1418507_s_at	2.2955	down	Socs2	suppressor of cytokine signaling 2
1449111_a_at	3.12953	down	Grb2	growth factor receptor bound protein 2
1449112_at	2.91672	down	Slc27a5	solute carrier family 27 (fatty acid transporter)
1449117_at	2.87926	down	Jund	Jun proto-oncogene related gene d
1418520_at	4.03798	down	Tgoln1	trans-golgi network protein
1423307_s_at	9.92855	down	Tgoln1 /// Tgoln2	trans-golgi network protein /// trans-golgi network protein 2
1418521_a_at	2.03	down	Mtx1	metaxin 1
1449119_at	5.23044	down	Arih2	ariadne homolog 2 (Drosophila)
1418527_a_at	8.73078	down	Fusip1	FUS interacting protein (serine-arginine rich) 1
1418536_at	17.2122	down	H2-Q7	histocompatibility 2
1449134_s_at	10.0119	down	Spic	Spi-C transcription factor (Spi-1/PU.1 related)
1418555_x_at	3.39264	down	Spic	Spi-C transcription factor (Spi-1/PU.1 related)
1449137_at	2.934	down	Pdha1	pyruvate dehydrogenase E1 alpha 1
1418571_at	4.05008	down	Tnfrsf12a	tumor necrosis factor receptor superfamily
1418572_x_at	3.78559	down	Tnfrsf12a	tumor necrosis factor receptor superfamily
1449144_at	3.00403	down	Gna11	guanine nucleotide binding protein
1418598_at	2.09053	down	Ubox5	U box domain containing 5
1449155_at	6.62296	down	Polr3g	polymerase (RNA) III (DNA directed) polypeptide G
1418628_at	9.27595	down	Khdrbs1	KH domain containing
1418644_a_at	2.38617	down	Stk11	serine/threonine kinase 11
1432181_s_at	2.43148	down	Sco2	SCO cytochrome oxidase deficient homolog 2 (yeast)
1449170_at	7.67046	down	Piwil2	piwi-like homolog 2 (Drosophila)
1431411_a_at	2.08523	down	Rai12	retinoic acid induced 12
1449196_a_at	11.6239	down	EG619900 /// EG668779 /// Gm1821 /// LOC100042019 /// Rps27a /// Ubb /// Ubc	predicted gene
1418727_at	3.50462	down	Nup155	nucleoporin 155
1418730_at	2.38423	down	Rnf12	ring finger protein 12
1418741_at	2.12788	down	Itgb7	integrin beta 7
1449208_at	2.85034	down	Papolb	poly (A) polymerase beta (testis specific)
1418761_at	2.43687	down	Igf2bp1	insulin-like growth factor 2 mRNA binding protein 1
1418765_at	14.1288	down	Timd2	T-cell immunoglobulin and mucin domain containing 2
1418766_s_at	131.569	down	Timd2	T-cell immunoglobulin and mucin domain containing 2
1449221_a_at	2.01742	down	Rrbp1	ribosome binding protein 1
1418794_at	2.08463	down	Cds2	CDP-diacylglycerol synthase (phosphatidate cytidylyltransferase) 2
1449232_at	9.06302	down	Gata1	GATA binding protein 1
1449243_a_at	3.29119	down	Rps19	ribosomal protein S19
1460243_at	2.66649	down	Sptlc2	serine palmitoyltransferase
1449244_at	2.55441	down	Cdh2 /// LOC100044363	cadherin 2 /// similar to N-cadherin
1418822_a_at	2.27712	down	Arf6	ADP-ribosylation factor 6
1432444_a_at	2.22298	down	Eapp	E2F-associated phosphoprotein
1418869_a_at	2.8744	down	Pus1	pseudouridine synthase 1
1418883_a_at	19.0049	down	Pabpc1	poly A binding protein
1449255_a_at	6.90405	down	Rpl15	ribosomal protein L15
1418884_x_at	4.76863	down	Tuba1a	tubulin
1418885_a_at	4.28484	down	Idh3b	isocitrate dehydrogenase 3 (NAD+) beta
1418886_s_at	5.71866	down	Idh3b	isocitrate dehydrogenase 3 (NAD+) beta
1418888_a_at	2.38961	down	Sepx1	selenoprotein X 1
1455211_a_at	2.40287	down	Timm10 /// Timm13	translocase of inner mitochondrial membrane 10 homolog (yeast) /// translocase of inner mitochondrial membrane 13 homolog (yeast)
1449264_at	2.57313	down	Syt11	synaptotagmin XI
1449268_at	5.57802	down	Gfpt1	glutamine fructose-6-phosphate transaminase 1
1451828_a_at	6.81993	down	Acsl4	acyl-CoA synthetase long-chain family member 4
1418914_s_at	3.37163	down	Bhmt2	betaine-homocysteine methyltransferase 2
1418919_at	3.37035	down	Sgol1	shugoshin-like 1 (S. pombe)
1449278_at	3.42078	down	Eif2ak3 /// LOC100047634	eukaryotic translation initiation factor 2 alpha kinase 3 /// similar to Eukaryotic translation initiation factor 2 alpha kinase 3
1424639_a_at	3.9841	down	Hmgcl	3-hydroxy-3-methylglutaryl-Coenzyme A lyase
1418956_at	2.23754	down	Tssk6	testis-specific serine kinase 6
1418962_at	2.86671	down	Necap2	NECAP endocytosis associated 2
1431428_a_at	3.0839	down	Nosip	nitric oxide synthase interacting protein
1418965_at	2.36733	down	Nosip	nitric oxide synthase interacting protein
1418966_a_at	2.77383	down	Dcbld1	discoidin
1449295_at	2.96781	down	Sap30bp	SAP30 binding protein
1418986_a_at	2.17459	down	Uxt	ubiquitously expressed transcript
1449323_a_at	9.02932	down	LOC100043000 /// Rpl3	similar to ribosomal protein L3 /// ribosomal protein L3
1419029_at	12.4962	down	Ero1l	ERO1-like (S. cerevisiae)
1419034_at	9.97063	down	Csnk2a1 /// ENSMUSG00000057808	casein kinase 2
1419035_s_at	2.81925	down	Csnk2a1 /// ENSMUSG00000057808 /// LOC100047957	casein kinase 2
1419056_at	2.90045	down	Rtn2	reticulon 2 (Z-band associated protein)
1419058_at	4.77759	down	Polr1e	polymerase (RNA) I polypeptide E
1419067_a_at	16.0911	down	Rabgef1	RAB guanine nucleotide exchange factor (GEF) 1
1419068_at	5.6496	down	Rabgef1	RAB guanine nucleotide exchange factor (GEF) 1
1419069_at	2.09212	down	Rabgef1	RAB guanine nucleotide exchange factor (GEF) 1
1419078_at	3.4843	down	Nin	ninein
1449333_at	2.27901	down	Sf3a1	splicing factor 3a
1419095_a_at	11.1548	down	Apom	apolipoprotein M
1419103_a_at	4.02629	down	Abhd6	abhydrolase domain containing 6
1419104_at	10.9291	down	Abhd6	abhydrolase domain containing 6
1449344_s_at	2.36556	down	2210409E12Rik	RIKEN cDNA 2210409E12 gene
1449348_at	2.27135	down	Mpp6	membrane protein
1449354_at	2.58634	down	Zrsr1	zinc finger (CCCH type)
1449365_at	9.5746	down	S1pr5	sphingosine-1-phosphate receptor 5
1449371_at	2.04372	down	Hars2	histidyl-tRNA synthetase 2
1449377_at	4.54847	down	Nicn1	nicolin 1
1419191_at	2.57998	down	Hipk3	homeodomain interacting protein kinase 3
1419202_at	2.39746	down	Cst7	cystatin F (leukocystatin)
1449390_at	2.57463	down	Gpatch4	G patch domain containing 4
1419205_x_at	3.68295	down	Gpatch4	G patch domain containing 4
1419257_at	3.42702	down	Tcea1	transcription elongation factor A (SII) 1
1419260_a_at	2.01876	down	Snrpb	small nuclear ribonucleoprotein B
1419263_a_at	2.6429	down	Adrm1	adhesion regulating molecule 1
1419266_at	2.72991	down	Nfyb	nuclear transcription factor-Y beta
1419275_at	3.51866	down	Dazap1	DAZ associated protein 1
1419281_a_at	4.64991	down	Zfp259	zinc finger protein 259
1449435_at	7.39861	down	B4galt3	UDP-Gal:betaGlcNAc beta 1
1419351_a_at	4.5368	down	l7Rn6	lethal
1449438_at	3.62996	down	Adnp /// Dpm1	activity-dependent neuroprotective protein /// dolichol-phosphate (beta-D) mannosyltransferase 1
1425937_a_at	6.88347	down	Hexim1	hexamethylene bis-acetamide inducible 1
1419364_a_at	5.13346	down	EG624124 /// LOC634044 /// Rps7	predicted gene
1419377_at	2.23816	down	Med9	mediator of RNA polymerase II transcription
1449460_at	2.35792	down	Asb13	ankyrin repeat and SOCS box-containing 13
1419415_a_at	2.16194	down	Rarg	retinoic acid receptor
1419441_at	6.20617	down	Rplp0	ribosomal protein
1419460_at	2.69674	down	Rpp14	ribonuclease P 14 subunit (human)
1419461_at	6.29033	down	Rpp14	ribonuclease P 14 subunit (human)
1431270_a_at	4.3319	down	Aste1	asteroid homolog 1 (Drosophila)
1419516_at	2.18611	down	Fam50a	family with sequence similarity 50
1419543_a_at	3.97321	down	Sfrs10	splicing factor
1419544_at	2.23436	down	Atp6v1c1	ATPase
1449503_at	7.68	down	Kpna1	karyopherin (importin) alpha 1
1449504_at	4.60874	down	Kpna1	karyopherin (importin) alpha 1
1460260_s_at	7.59875	down	Kpna1	karyopherin (importin) alpha 1
1449505_at	6.98771	down	Kpna1	karyopherin (importin) alpha 1
1449514_at	2.12247	down	Grk5	G protein-coupled receptor kinase 5
1419575_s_at	2.05786	down	Zfp292	zinc finger protein 292
1419616_at	2.26923	down	Bmpr2	bone morphogenic protein receptor
1449543_at	7.91113	down	Zscan5b	zinc finger and SCAN domain containing 5B
1419638_at	2.4442	down	Efnb2	ephrin B2
1419641_at	42.8483	down	Purb	purine rich element binding protein B
1419656_at	6.14139	down	Slc25a36	solute carrier family 25
1449568_at	2.72101	down	Klb	klotho beta
1449574_a_at	2.83584	down	Cdc42	cell division cycle 42 homolog (S. cerevisiae)
1419737_a_at	2.04279	down	Ldha	lactate dehydrogenase A
1420366_at	2.85142	down	Spesp1	sperm equatorial segment protein 1
1420368_at	3.09579	down	Denr	density-regulated protein
1449839_at	3.37581	down	Casp3	caspase 3
1420383_a_at	2.23363	down	Col4a3bp	collagen
1420410_at	2.28013	down	Nr5a2	nuclear receptor subfamily 5
1449862_a_at	5.04494	down	Pi4k2b	phosphatidylinositol 4-kinase type 2 beta
1420472_at	2.40261	down	Mtpn	myotrophin
1420486_at	24.2718	down	Nol7	nucleolar protein 7
1420494_x_at	3.64957	down	Gm1821 /// LOC100048105 /// Rps27a /// Ubb /// Ubc	gene model 1821
1420502_at	2.65166	down	Sat1	spermidine/spermine N1-acetyl transferase 1
1420535_a_at	2.27381	down	Nub1	negative regulator of ubiquitin-like proteins 1
1420548_a_at	5.45015	down	2310008H09Rik	RIKEN cDNA 2310008H09 gene
1420592_a_at	4.14088	down	Anp32e	acidic (leucine-rich) nuclear phosphoprotein 32 family
1420599_at	2.54674	down	2300006N05Rik /// OTTMUSG00000002180 /// OTTMUSG00000002208	RIKEN cDNA 2300006N05 gene /// predicted gene
1449930_a_at	2.19392	down	Ssr2	signal sequence receptor
1420616_at	2.07248	down	Ash2l	ash2 (absent
1449931_at	2.26124	down	Cpeb4	cytoplasmic polyadenylation element binding protein 4
1420626_at	3.49403	down	Gtf3c6	general transcription factor IIIC
1449940_a_at	2.34162	down	Eif2b4	eukaryotic translation initiation factor 2B
1420639_at	5.04582	down	Jmy	junction-mediating and regulatory protein
1420640_at	20.3083	down	Jmy	junction-mediating and regulatory protein
1449944_a_at	2.15275	down	Sec61a2	Sec61
1420646_at	7.11331	down	LOC100047601 /// Nus1	similar to DNA segment
1425142_a_at	3.89736	down	Hnrnpd	heterogeneous nuclear ribonucleoprotein D
1425628_a_at	2.89503	down	Gtf2i	general transcription factor II I
1460279_a_at	2.30136	down	Gtf2i	general transcription factor II I
1452787_a_at	2.76306	down	Prmt1	protein arginine N-methyltransferase 1
1420754_at	2.36825	down	Ttf1	transcription termination factor
1420766_at	2.81797	down	Socs7	suppressor of cytokine signaling 7
1420773_at	29.2599	down	Dub1	deubiquitinating enzyme 1
1426554_a_at	3.06555	down	Pgam1	phosphoglycerate mutase 1
1420822_s_at	10.7557	down	Sgpp1	sphingosine-1-phosphate phosphatase 1
1420878_a_at	2.47675	down	Ywhab	tyrosine 3-monooxygenase/tryptophan 5-monooxygenase activation protein
1450031_at	6.88516	down	Aff4	AF4/FMR2 family
1450050_at	2.17777	down	Hira	histone cell cycle regulation defective homolog A (S. cerevisiae)
1450057_at	3.94133	down	Sys1	SYS1 Golgi-localized integral membrane protein homolog (S. cerevisiae)
1420998_at	2.02704	down	Etv5	ets variant gene 5
1452156_a_at	2.22317	down	Nisch	nischarin
1450084_s_at	3.90498	down	Ivns1abp	influenza virus NS1A binding protein
1421019_at	11.9901	down	1700021F05Rik	RIKEN cDNA 1700021F05 gene
1450103_a_at	2.31748	down	Cyth2	cytohesin 2
1421046_a_at	3.65202	down	Pabpc4	poly A binding protein
1421054_at	2.43766	down	Xpo4	exportin 4
1421061_at	17.0365	down	Guca1a	guanylate cyclase activator 1a (retina)
1421062_s_at	2.19384	down	Clta	clathrin
1438317_a_at	7.33053	down	Endog	endonuclease G
1421097_at	2.49973	down	Endog	endonuclease G
1421117_at	3.24379	down	Dst	dystonin
1421122_at	11.7738	down	Cbll1	Casitas B-lineage lymphoma-like 1
1452406_x_at	3.06502	down	Erdr1	erythroid differentiation regulator 1
1450149_a_at	3.63178	down	Ppp1cc	protein phosphatase 1
1450150_a_at	5.32795	down	ENSMUSG00000059776 /// OTTMUSG00000009186 /// OTTMUSG00000025606 /// Rpl13	predicted gene
1427699_a_at	2.299	down	Ptpn11	protein tyrosine phosphatase
1450157_a_at	2.54437	down	Hmmr	hyaluronan mediated motility receptor (RHAMM)
1421205_at	2.14158	down	Atm	ataxia telangiectasia mutated homolog (human)
1421260_a_at	2.11654	down	Srm	spermidine synthase
1427064_a_at	3.67048	down	Scrib	scribbled homolog (Drosophila)
1421268_at	2.1949	down	Ugcg	UDP-glucose ceramide glucosyltransferase
1421269_at	2.01307	down	Ugcg	UDP-glucose ceramide glucosyltransferase
1421344_a_at	3.13652	down	Jub	ajuba
1450229_at	3.91991	down	Med14	mediator complex subunit 14
1450264_a_at	3.69055	down	Chka	choline kinase alpha
1421554_at	2.3157	down	Lmx1a	LIM homeobox transcription factor 1 alpha
1460300_a_at	2.47583	down	Ltk	leukocyte tyrosine kinase
1421624_a_at	2.83662	down	Enah	enabled homolog (Drosophila)
1426404_a_at	7.50227	down	Rnf11	ring finger protein 11
1421751_a_at	11.8227	down	Psmd14	proteasome (prosome
1426334_a_at	3.97257	down	Bcl2l11	BCL2-like 11 (apoptosis facilitator)
1421816_at	2.13803	down	LOC630729	similar to Glutathione reductase
1426854_a_at	22.0705	down	671392 /// LOC100047898 /// Set	predicted gene
1421819_a_at	3.6937	down	671392 /// Set	predicted gene
1427708_a_at	3.40794	down	Nf2	neurofibromatosis 2
1450382_at	2.25626	down	Nf2	neurofibromatosis 2
1421823_a_at	36.4119	down	LOC100044385 /// Ppp2cb	similar to protein phosphatase 2a
1450396_at	5.09698	down	Stag2	stromal antigen 2
1421873_s_at	2.65277	down	Rab24	RAB24
1421884_at	2.57592	down	Sos1	Son of sevenless homolog 1 (Drosophila)
1421889_a_at	8.02253	down	Aplp2	amyloid beta (A4) precursor-like protein 2
1421895_at	12.3907	down	Eif2s3x /// LOC100048746	eukaryotic translation initiation factor 2
1421902_at	3.23848	down	Med29	mediator complex subunit 29
1450400_at	2.0184	down	Tgs1	trimethylguanosine synthase homolog (S. cerevisiae)
1421904_at	4.93265	down	Tgs1	trimethylguanosine synthase homolog (S. cerevisiae)
1429485_a_at	6.54899	down	Utp11l	UTP11-like
1456436_x_at	19.1195	down	Rps20	ribosomal protein S20
1453097_a_at	2.86323	down	Ubtf	upstream binding transcription factor
1421945_a_at	3.15864	down	Bxdc1	brix domain containing 1
1450423_s_at	7.64684	down	Bxdc1	brix domain containing 1
1421968_a_at	3.78164	down	Nipa2	non imprinted in Prader-Willi/Angelman syndrome 2 homolog (human)
1421974_at	2.24242	down	Lrrc50	leucine rich repeat containing 50
1421985_a_at	2.14977	down	Eif4e2	eukaryotic translation initiation factor 4E member 2
1450452_a_at	10.8982	down	Narfl	nuclear prelamin A recognition factor-like
1421998_at	2.62094	down	LOC100047963 /// Tor3a	similar to ADIR1 /// torsin family 3
1450457_at	2.9066	down	Cbl	Casitas B-lineage lymphoma
1432164_a_at	77.2833	down	Gcsh	glycine cleavage system protein H (aminomethyl carrier)
1429456_a_at	18.7665	down	Polr3e	polymerase (RNA) III (DNA directed) polypeptide E
1422043_at	2.08399	down	Tsc1	tuberous sclerosis 1
1426793_a_at	2.62435	down	ENSMUSG00000046721 /// Rpl14	predicted gene
1450500_at	4.67077	down	LOC677213	similar to U2AF homology motif (UHM) kinase 1
1426236_a_at	2.55196	down	Glul	glutamate-ammonia ligase (glutamine synthetase)
1422186_s_at	2.106	down	Cyb5r3	cytochrome b5 reductase 3
1432526_a_at	4.37417	down	Snf8	SNF8
1422252_a_at	14.4579	down	Cdc25c	cell division cycle 25 homolog C (S. pombe)
1436763_a_at	9.22241	down	2310051E17Rik /// Klf9	RIKEN cDNA 2310051E17 gene /// Kruppel-like factor 9
1450560_a_at	2.69714	down	Ppp2r5d	protein phosphatase 2
1422307_at	2.05887	down	Sppl3	Signal peptide peptidase 3
1436586_x_at	3.68097	down	Rps14	ribosomal protein S14
1450624_at	14.2505	down	Bhmt	betaine-homocysteine methyltransferase
1422443_at	16.6075	down	Xpnpep1	X-prolyl aminopeptidase (aminopeptidase P) 1
1422459_a_at	3.49512	down	Psmd13	proteasome (prosome
1422475_a_at	3.67584	down	EG668144 /// ENSMUSG00000062611 /// Rps3a	predicted gene
1422480_at	2.63932	down	Snx3	sorting nexin 3
1422489_at	5.64365	down	Gcs1	glucosidase 1
1450632_at	4.62926	down	OTTMUSG00000008659 /// Rhoa	predicted gene
1422506_a_at	4.03873	down	Cstb	cystatin B
1450635_at	3.69678	down	Akp5	alkaline phosphatase 5
1450636_s_at	46.9638	down	Akp5	alkaline phosphatase 5
1422517_a_at	4.83545	down	Znrd1	zinc ribbon domain containing
1450653_at	24.4812	down	Spz1	spermatogenic leucine zipper 1
1422547_at	2.27107	down	Ranbp1	RAN binding protein 1
1450654_a_at	2.15132	down	Dhdds	dehydrodolichyl diphosphate synthase
1422553_at	13.2991	down	Pten	phosphatase and tensin homolog
1422557_s_at	26.7116	down	Mt1	metallothionein 1
1422569_at	52.9282	down	Yy1	YY1 transcription factor
1422570_at	3.90918	down	Yy1	YY1 transcription factor
1450665_at	23.9133	down	Gabpa	GA repeat binding protein
1422591_at	12.2329	down	Tceb3	transcription elongation factor B (SIII)
1450679_at	2.99796	down	5730470L24Rik	RIKEN cDNA 5730470L24 gene
1422599_s_at	2.35907	down	Zfp143	zinc finger protein 143
1422613_a_at	3.34224	down	EG434426 /// EG666669 /// Rpl7a	predicted gene
1422623_x_at	4.36071	down	Rpl41	ribosomal protein L41
1422636_at	2.44404	down	Dmtf1	cyclin D binding myb-like transcription factor 1
1422650_a_at	2.18525	down	Riok3	RIO kinase 3 (yeast)
1450705_at	6.33101	down	Rdbp	RD RNA-binding protein
1456604_a_at	4.00349	down	Pcmt1	protein-L-isoaspartate (D-aspartate) O-methyltransferase 1
1450711_at	2.10936	down	Brd4	bromodomain containing 4
1422709_a_at	2.23519	down	Wdr46	WD repeat domain 46
1450722_at	3.59627	down	Nup50	nucleoporin 50
1422737_at	3.14836	down	Ncoa3	nuclear receptor coactivator 3
1422747_at	5.5868	down	Chek2	CHK2 checkpoint homolog (S. pombe)
1450735_at	2.30907	down	Pno1	partner of NOB1 homolog (S. cerevisiae)
1422753_a_at	2.48311	down	Polr3k	polymerase (RNA) III (DNA directed) polypeptide K
1422767_at	2.84554	down	Bysl	bystin-like
1450742_at	3.98846	down	Bysl	bystin-like
1422768_at	14.5779	down	Syncrip	synaptotagmin binding
1450744_at	21.2938	down	Ell2	elongation factor RNA polymerase II 2
1422786_at	6.40583	down	Slc30a1	solute carrier family 30 (zinc transporter)
1422794_at	2.99231	down	Cul3	cullin 3
1422801_at	10.8556	down	G3bp1	Ras-GTPase-activating protein SH3-domain binding protein 1
1422844_a_at	6.78953	down	Wdr77	WD repeat domain 77
1450778_a_at	2.31789	down	Phax	phosphorylated adaptor for RNA export
1422845_at	3.27638	down	Canx	calnexin
1422847_a_at	2.56966	down	Prkcd	protein kinase C
1422857_at	3.23601	down	Trip4	thyroid hormone receptor interactor 4
1422885_at	2.12859	down	Snrpd3	small nuclear ribonucleoprotein D3
1453362_x_at	10.4503	down	EG629116 /// LOC677113 /// Rps24	predicted gene
1422922_at	2.31671	down	Recql4	RecQ protein-like 4
1422937_at	2.9159	down	Fzd5	frizzled homolog 5 (Drosophila)
1425964_x_at	2.94372	down	Hspb1	heat shock protein 1
1422966_a_at	19.5818	down	Tfrc	transferrin receptor
1422993_s_at	7.00852	down	Refbp2 /// Thoc4	RNA and export factor binding protein 2 /// THO complex 4
1423000_a_at	11.4176	down	Dgke	diacylglycerol kinase
1426138_a_at	10.1127	down	Ube2j2	ubiquitin-conjugating enzyme E2
1423009_at	2.44211	down	Sec1	secretory blood group 1
1425241_a_at	4.46161	down	Wsb1	WD repeat and SOCS box-containing 1
1450840_a_at	11.3045	down	Rpl39	ribosomal protein L39
1450845_a_at	92.2622	down	Bzw1	basic leucine zipper and W2 domains 1
1423040_at	52.4534	down	Bzw1	basic leucine zipper and W2 domains 1
1423044_at	19.5904	down	Prosc	proline synthetase co-transcribed
1450847_at	23.0072	down	Ncbp2	nuclear cap binding protein subunit 2
1423048_a_at	2.58359	down	Tollip	toll interacting protein
1423051_at	7.16259	down	Hnrnpu	heterogeneous nuclear ribonucleoprotein U
1423053_at	9.07765	down	Arf4	ADP-ribosylation factor 4
1423069_at	23.5649	down	Adnp	activity-dependent neuroprotective protein
1455767_x_at	11.4853	down	ENSMUSG00000058640 /// ENSMUSG00000061115 /// ENSMUSG00000066180 /// ENSMUSG00000066443 /// ENSMUSG00000068397 /// LOC100044606 /// LOC100045641 /// LOC100046290 /// LOC100047314 /// LOC100048241 /// LOC675980 /// OTTMUSG00000017565 /// OTTMUSG00000019286	predicted gene
1423071_x_at	2.17719	down	6720475J19Rik	RIKEN cDNA 6720475J19 gene
1423079_a_at	115.313	down	LOC100044630 /// OTTMUSG00000016825 /// OTTMUSG00000020738 /// Tomm20	similar to Translocase of outer mitochondrial membrane 20 homolog (yeast) /// predicted gene
1423080_at	10.5527	down	LOC100044630 /// OTTMUSG00000016825 /// Tomm20	similar to Translocase of outer mitochondrial membrane 20 homolog (yeast) /// predicted gene
1423081_a_at	6.22981	down	Tomm20	translocase of outer mitochondrial membrane 20 homolog (yeast)
1423108_at	3.5534	down	Slc25a20	solute carrier family 25 (mitochondrial carnitine/acylcarnitine translocase)
1423122_at	2.60129	down	Avpi1	arginine vasopressin-induced 1
1423130_a_at	2.96737	down	Sfrs5	splicing factor
1423133_at	2.25452	down	Cwc15	CWC15 homolog (S. cerevisiae)
1423134_at	5.29249	down	Rilpl2	Rab interacting lysosomal protein-like 2
1450869_at	2.44593	down	Fgf1	fibroblast growth factor 1
1423151_at	2.21304	down	Dnajb11	DnaJ (Hsp40) homolog
1450882_s_at	2.14684	down	Gpr137b /// Gpr137b-ps /// LOC100044979	G protein-coupled receptor 137B /// G protein-coupled receptor 137B
1423165_a_at	2.84459	down	Mta2	metastasis-associated gene family
1423181_s_at	2.83703	down	Clns1a	chloride channel
1423185_a_at	2.72577	down	Ubap1	ubiquitin-associated protein 1
1450893_a_at	6.67287	down	Ubap1	ubiquitin-associated protein 1
1423187_at	4.94565	down	Gabarapl2	gamma-aminobutyric acid (GABA-A) receptor-associated protein-like 2
1423192_at	4.18892	down	Pspc1	paraspeckle protein 1
1450898_at	2.71417	down	Hiat1	hippocampus abundant gene transcript 1
1450902_at	2.43827	down	Brd3	bromodomain containing 3
1450903_at	2.87608	down	Rad23b	RAD23b homolog (S. cerevisiae)
1450904_at	2.16671	down	Tmem167	transmembrane protein 167
1425780_a_at	7.35227	down	Tmem167	transmembrane protein 167
1423216_a_at	2.57457	down	2510049I19Rik	RIKEN cDNA 2510049I19 gene
1423218_a_at	3.65845	down	Mrpl49	mitochondrial ribosomal protein L49
1423219_a_at	2.44572	down	Mrpl49	mitochondrial ribosomal protein L49
1450908_at	3.61813	down	Eif4e	eukaryotic translation initiation factor 4E
1423234_at	2.42618	down	Psmd5	proteasome (prosome
1423245_at	2.12926	down	Cops7a	COP9 (constitutive photomorphogenic) homolog
1431951_a_at	3.45597	down	Usp16	ubiquitin specific peptidase 16
1423283_at	9.80745	down	Pitpna	phosphatidylinositol transfer protein
1423286_at	2.11335	down	Cbln1 /// LOC100046314	cerebellin 1 precursor protein /// similar to precerebellin-1
1423289_a_at	2.46126	down	1810029B16Rik	RIKEN cDNA 1810029B16 gene
1423309_at	2.1466	down	Tgoln1	trans-golgi network protein
1423324_at	3.76247	down	Pnn	pinin
1423327_at	4.25367	down	Rpl39l	ribosomal protein L39-like
1423335_at	2.13664	down	1110004F10Rik	RIKEN cDNA 1110004F10 gene
1423355_at	3.9921	down	Snap29	synaptosomal-associated protein 29
1423358_at	2.48088	down	Ece2	endothelin converting enzyme 2
1423361_at	2.90406	down	Yme1l1	YME1-like 1 (S. cerevisiae)
1450956_at	2.26467	down	LOC100048724 /// Scd3	similar to fatty acid desaturase /// stearoyl-coenzyme A desaturase 3
1450968_at	2.2043	down	Uqcrfs1	ubiquinol-cytochrome c reductase
1450971_at	2.14634	down	Gadd45b	growth arrest and DNA-damage-inducible 45 beta
1423409_a_at	8.72156	down	2500003M10Rik	RIKEN cDNA 2500003M10 gene
1423416_at	3.89454	down	Smarcc1	SWI/SNF related
1450980_at	3.65349	down	Gtpbp3	GTP binding protein 3
1438115_a_at	2.864	down	Slc9a3r1	solute carrier family 9 (sodium/hydrogen exchanger)
1438116_x_at	2.41488	down	Slc9a3r1	solute carrier family 9 (sodium/hydrogen exchanger)
1460334_at	2.41632	down	Dbnl	drebrin-like
1450983_at	16.5045	down	Akap8	A kinase (PRKA) anchor protein 8
1423431_a_at	17.7255	down	Mybbp1a	MYB binding protein (P160) 1a
1450989_at	2.04208	down	Tdgf1	teratocarcinoma-derived growth factor 1
1423441_at	4.78876	down	Tfb2m	transcription factor B2
1423442_a_at	2.81652	down	Fbxw2	F-box and WD-40 domain protein 2
1423447_at	12.0425	down	Clpx	caseinolytic peptidase X (E.coli)
1423452_at	2.71726	down	Stk17b	serine/threonine kinase 17b (apoptosis-inducing)
1423453_at	2.87449	down	Nol12	nucleolar protein 12
1423455_at	6.4373	down	ENSMUSG00000045799 /// Ptma	predicted gene
1423465_at	2.84549	down	Frrs1 /// LOC100046401	ferric-chelate reductase 1 /// similar to SDR2
1451004_at	2.22594	down	Acvr2a	activin receptor IIA
1423475_at	10.448	down	Cnnm2	cyclin M2
1423479_at	3.25862	down	Nol11	nucleolar protein 11
1423480_at	15.153	down	Nol11	nucleolar protein 11
1423483_s_at	3.54544	down	Taf1c	TATA box binding protein (Tbp)-associated factor
1455988_a_at	71.8271	down	Cct6a	chaperonin containing Tcp1
1423517_at	18.8128	down	Cct6a	chaperonin containing Tcp1
1423520_at	7.19851	down	Lmnb1	lamin B1
1423532_at	2.5591	down	Rnf44	ring finger protein 44
1423534_at	10.3926	down	Pdcd2	programmed cell death 2
1423535_at	2.84942	down	Strn3	striatin
1423539_at	3.2299	down	Pms2	postmeiotic segregation increased 2 (S. cerevisiae)
1451020_at	9.88415	down	Gsk3b	glycogen synthase kinase 3 beta
1423564_a_at	5.95889	down	Paics	phosphoribosylaminoimidazole carboxylase
1423565_at	4.88763	down	Paics	phosphoribosylaminoimidazole carboxylase
1423575_a_at	3.16571	down	Wbscr22	Williams Beuren syndrome chromosome region 22
1451039_at	4.21576	down	2610027L16Rik	RIKEN cDNA 2610027L16 gene
1451042_a_at	3.99301	down	Mina	myc induced nuclear antigen
1451044_at	2.65764	down	Sip1	survival of motor neuron protein interacting protein 1
1423610_at	3.06949	down	Metap2	methionine aminopeptidase 2
1423612_at	2.27063	down	Clp1	CLP1
1423617_at	3.03719	down	Cog8	component of oligomeric golgi complex 8
1451052_at	2.21013	down	Cog8 /// Pdf	component of oligomeric golgi complex 8 /// peptide deformylase (mitochondrial)
1451064_a_at	26.8824	down	Psat1	phosphoserine aminotransferase 1
1437666_x_at	4.25527	down	Gm1821 /// LOC100048105 /// Rps27a /// Ubb /// Ubc	gene model 1821
1451068_s_at	5.47966	down	Rps25	ribosomal protein S25
1451069_at	2.32917	down	Pim3	proviral integration site 3
1423652_at	2.74591	down	Isca1	iron-sulfur cluster assembly 1 homolog (S. cerevisiae)
1451072_a_at	8.76023	down	Rnf4	ring finger protein 4
1423657_at	2.00831	down	Cdipt	CDP-diacylglycerol--inositol 3-phosphatidyltransferase (phosphatidylinositol synthase)
1423665_a_at	2.89178	down	OTTMUSG00000022843 /// Rpl5	predicted gene
1423670_a_at	3.4131	down	Srpr	signal recognition particle receptor ('docking protein')
1423672_at	2.7321	down	Ttc30b	tetratricopeptide repeat domain 30B
1423675_at	2.27219	down	Usp1	ubiquitin specific peptdiase 1
1451081_a_at	2.20211	down	Tcf25	transcription factor 25 (basic helix-loop-helix)
1451083_s_at	4.71652	down	Aars	alanyl-tRNA synthetase
1423686_a_at	7.92553	down	Prr13	proline rich 13
1423687_a_at	4.00905	down	Man2c1	mannosidase
1423706_a_at	2.28107	down	Pgd	phosphogluconate dehydrogenase
1423707_at	3.24961	down	Tmem50b	transmembrane protein 50B
1423711_at	2.23332	down	Ndufaf1	NADH dehydrogenase (ubiquinone) 1 alpha subcomplex
1423728_at	2.90148	down	Eif3l	eukaryotic translation initiation factor 3
1423740_a_at	194.123	down	Rbm10	RNA binding motif protein 10
1423741_at	39.6244	down	Rbm10	RNA binding motif protein 10
1423749_s_at	3.88272	down	Rangap1	RAN GTPase activating protein 1
1423752_at	2.63714	down	Ddx47	DEAD (Asp-Glu-Ala-Asp) box polypeptide 47
1423753_at	2.15521	down	Bambi	BMP and activin membrane-bound inhibitor
1451100_a_at	2.75737	down	Cdv3	carnitine deficiency-associated gene expressed in ventricle 3
1451101_a_at	2.65376	down	ENSMUSG00000072940 /// OTTMUSG00000010817 /// Rps28	predicted gene
1423763_x_at	2.72623	down	ENSMUSG00000072940 /// Rps28	predicted gene
1423782_at	9.59025	down	Mobkl1b	MOB1
1423783_at	2.59547	down	Tor2a	torsin family 2
1423787_at	2.23301	down	Nup133	nucleoporin 133
1451115_at	2.02346	down	Pias3	protein inhibitor of activated STAT 3
1451121_a_at	2.22486	down	Gltscr2	glioma tumor suppressor candidate region gene 2
1423803_s_at	16.7688	down	Gltscr2	glioma tumor suppressor candidate region gene 2
1423807_a_at	4.48406	down	Calm1 /// Calm2 /// Calm3	calmodulin 1 /// calmodulin 2 /// calmodulin 3
1423809_at	4.96132	down	Tcf19	transcription factor 19
1423817_s_at	2.2123	down	Use1	unconventional SNARE in the ER 1 homolog (S. cerevisiae)
1434538_x_at	2.48973	down	Eif2b2	eukaryotic translation initiation factor 2B
1423828_at	3.10853	down	Fasn	fatty acid synthase
1451139_at	7.96795	down	Slc39a4	solute carrier family 39 (zinc transporter)
1423833_a_at	8.15916	down	Brp44	brain protein 44
1423838_s_at	3.82867	down	2400003C14Rik	RIKEN cDNA 2400003C14 gene
1423846_x_at	4.75003	down	Tuba1b	tubulin
1423847_at	4.00968	down	Ncapd2	non-SMC condensin I complex
1423855_x_at	2.53687	down	ENSMUSG00000066475 /// ENSMUSG00000067748 /// ENSMUSG00000070510 /// LOC100041933 /// LOC100045527 /// LOC100046300 /// Rpl17	predicted gene
1423862_at	8.3534	down	Plekhf2	pleckstrin homology domain containing
1423879_at	13.721	down	D030056L22Rik	RIKEN cDNA D030056L22 gene
1451151_s_at	2.97539	down	Zfp410	zinc finger protein 410
1423902_s_at	2.67398	down	Arhgef12	Rho guanine nucleotide exchange factor (GEF) 12
1423907_a_at	13.123	down	Ndufs8	NADH dehydrogenase (ubiquinone) Fe-S protein 8
1423908_at	2.28519	down	Ndufs8	NADH dehydrogenase (ubiquinone) Fe-S protein 8
1451165_at	2.11107	down	Lmbr1l	limb region 1 like
1423917_a_at	2.52168	down	Cttn	cortactin
1423922_s_at	3.15756	down	Ints3	integrator complex subunit 3
1423939_a_at	6.37474	down	Yif1a	Yip1 interacting factor homolog A (S. cerevisiae)
1423964_at	3.53325	down	Cpsf3l	cleavage and polyadenylation specific factor 3-like
1423976_at	3.42722	down	4930453N24Rik	RIKEN cDNA 4930453N24 gene
1451195_a_at	2.08259	down	Txndc1	thioredoxin domain containing 1
1427396_a_at	3.47233	down	Csde1	cold shock domain containing E1
1423998_at	2.20497	down	Gtf3c5	general transcription factor IIIC
1424000_a_at	10.2161	down	Rps11	ribosomal protein S11
1424001_at	2.89632	down	Mki67ip	Mki67 (FHA domain) interacting nucleolar phosphoprotein
1424005_at	2.12053	down	B230219D22Rik	RIKEN cDNA B230219D22 gene
1451205_at	2.67614	down	Psmb4	proteasome (prosome
1451208_at	12.9095	down	Etf1	eukaryotic translation termination factor 1
1424015_at	2.18342	down	Dennd5a	DENN/MADD domain containing 5A
1424017_a_at	5.27828	down	Hint1	histidine triad nucleotide binding protein 1
1424018_at	2.26452	down	Hint1	histidine triad nucleotide binding protein 1
1424019_at	4.85111	down	Nop2	NOP2 nucleolar protein homolog (yeast)
1424028_at	3.33053	down	5830457O10Rik	RIKEN cDNA 5830457O10 gene
1424052_at	2.11606	down	Thap4	THAP domain containing 4
1424075_at	3.27911	down	9430016H08Rik	RIKEN cDNA 9430016H08 gene
1451227_a_at	3.74529	down	Slc10a3	solute carrier family 10 (sodium/bile acid cotransporter family)
1424082_at	2.2136	down	Tbc1d13	TBC1 domain family
1424088_at	4.21465	down	Myg1	melanocyte proliferating gene 1
1424102_at	5.20856	down	Atg4b	autophagy-related 4B (yeast)
1424110_a_at	3.6971	down	LOC100046344 /// Nme1	similar to Nucleoside diphosphate kinase A (NDK A) (NDP kinase A) (Tumor metastatic process-associated protein) (Metastasis inhibition factor NM23) (NDPK-A) (nm23-M1) /// non-metastatic cells 1
1424111_at	2.84407	down	Igf2r	insulin-like growth factor 2 receptor
1424112_at	3.51898	down	Igf2r	insulin-like growth factor 2 receptor
1455456_a_at	2.00363	down	Timm50	translocase of inner mitochondrial membrane 50 homolog (yeast)
1431505_at	2.03537	down	LOC629952 /// OTTMUSG00000002349 /// Ppih	similar to Peptidyl-prolyl cis-trans isomerase H (PPIase H) (Rotamase H) /// predicted gene
1424145_at	2.09974	down	Prr3	proline-rich polypeptide 3
1451262_a_at	2.88489	down	Jtv1	JTV1 gene
1424161_at	7.3805	down	Ddx27	DEAD (Asp-Glu-Ala-Asp) box polypeptide 27
1424163_at	7.77103	down	Rmnd5b	required for meiotic nuclear division 5 homolog B (S. cerevisiae)
1424167_a_at	2.62599	down	Pmm1	phosphomannomutase 1
1424206_at	2.11687	down	Smarca5	SWI/SNF related
1424216_a_at	6.71387	down	Papola	poly (A) polymerase alpha
1424217_at	3.42778	down	Papola	poly (A) polymerase alpha
1427578_a_at	2.06284	down	Eif6	eukaryotic translation initiation factor 6
1424227_at	4.64294	down	Polr3h	polymerase (RNA) III (DNA directed) polypeptide H
1424229_at	2.94086	down	Dyrk3	dual-specificity tyrosine-(Y)-phosphorylation regulated kinase 3
1424236_at	2.11886	down	Tbc1d10b	TBC1 domain family
1424237_at	3.96767	down	Zfp639	zinc finger protein 639
1424241_at	5.57974	down	Slc30a6	solute carrier family 30 (zinc transporter)
1451278_a_at	2.49338	down	Mettl11a	methyltransferase like 11A
1424244_at	10.5603	down	Rwdd4a	RWD domain containing 4A
1424255_at	4.30558	down	Supt5h	suppressor of Ty 5 homolog (S. cerevisiae)
1424261_at	4.13655	down	Zfp672	zinc finger protein 672
1424265_at	25.9404	down	Npl	N-acetylneuraminate pyruvate lyase
1451293_at	2.11533	down	Rrp9	RRP9
1451296_x_at	5.5787	down	Pabpc4	poly A binding protein
1451303_at	2.10221	down	BC002230	cDNA sequence BC002230
1424311_at	2.47623	down	Carkd	carbohydrate kinase domain containing
1451311_a_at	3.50158	down	Adipor1	adiponectin receptor 1
1424313_a_at	4.63949	down	Ndufs7	NADH dehydrogenase (ubiquinone) Fe-S protein 7
1424319_at	2.73422	down	Oraov1	oral cancer overexpressed 1
1424323_at	13.4049	down	Noc2l	nucleolar complex associated 2 homolog (S. cerevisiae)
1424327_at	2.1843	down	3200002M19Rik	RIKEN cDNA 3200002M19 gene
1424331_at	7.48759	down	Rab40c	Rab40c
1451320_at	3.43418	down	Arhgap8	Rho GTPase activating protein 8
1451323_at	2.78397	down	Zfp7	zinc finger protein 7
1424342_at	2.34248	down	Fyttd1	forty-two-three domain containing 1
1424343_a_at	5.04344	down	Eif1a	eukaryotic translation initiation factor 1A
1424349_a_at	2.97861	down	Lpgat1	lysophosphatidylglycerol acyltransferase 1
1424360_at	2.21812	down	BC019943	cDNA sequence BC019943
1424366_at	2.52085	down	Dolk	dolichol kinase
1424377_at	3.0306	down	BC003885 /// EG623867	cDNA sequence BC003885 /// predicted gene
1424381_at	3.24342	down	Sf4	splicing factor 4
1424404_at	2.47613	down	0610040J01Rik	RIKEN cDNA 0610040J01 gene
1424416_at	2.27194	down	Nkiras2	NFKB inhibitor interacting Ras-like protein 2
1424420_at	2.38651	down	Ccpg1	cell cycle progression 1
1424424_at	4.94366	down	LOC635418 /// Slc39a1	similar to Zinc transporter ZIP1 (Zinc-iron regulated transporter-like) (Solute carrier family 39 member 1) /// solute carrier family 39 (zinc transporter)
1424436_at	7.28969	down	Gart	phosphoribosylglycinamide formyltransferase
1424452_at	7.58785	down	Sltm	SAFB-like
1424469_a_at	5.22258	down	Cpsf4	cleavage and polyadenylation specific factor 4
1424473_at	3.84995	down	Polr2h	polymerase (RNA) II (DNA directed) polypeptide H
1451366_at	3.97646	down	Cops6	COP9 (constitutive photomorphogenic) homolog
1449694_s_at	3.29045	down	Commd5	COMM domain containing 5
1451376_at	6.81861	down	Atl3	atlastin GTPase 3
1424500_at	8.43983	down	Utp6	UTP6
1424515_at	2.58298	down	B230354K17Rik	RIKEN cDNA B230354K17 gene
1424516_at	7.43587	down	B230354K17Rik	RIKEN cDNA B230354K17 gene
1419803_s_at	2.26777	down	Ccdc12	coiled-coil domain containing 12
1424522_at	3.01346	down	Heatr1	HEAT repeat containing 1
1420033_s_at	2.25381	down	Ppp2r2d	protein phosphatase 2
1424533_a_at	2.44604	down	Ccdc137	coiled-coil domain containing 137
1424538_at	3.1569	down	Ubl4	ubiquitin-like 4
1424540_at	4.21594	down	Hipk1	homeodomain interacting protein kinase 1
1424545_at	23.8687	down	BC003965	cDNA sequence BC003965
1424548_at	4.66953	down	Lime1 /// Zgpat	Lck interacting transmembrane adaptor 1 /// zinc finger
1460362_at	2.82031	down	2410001C21Rik	RIKEN cDNA 2410001C21 gene
1424569_at	2.25063	down	Ddx46	DEAD (Asp-Glu-Ala-Asp) box polypeptide 46
1424577_at	2.43333	down	Msto1	misato homolog 1 (Drosophila)
1424584_a_at	11.3481	down	Ranbp10	RAN binding protein 10
1424585_at	3.96383	down	Ranbp10	RAN binding protein 10
1451401_a_at	2.61615	down	Mul1	mitochondrial ubiquitin ligase activator of NFKB 1
1424589_s_at	3.65517	down	Rnpc3	RNA-binding region (RNP1
1424591_at	5.00839	down	5830433M19Rik	RIKEN cDNA 5830433M19 gene
1424595_at	2.69945	down	F11r	F11 receptor
1424597_at	4.27229	down	ORF19	open reading frame 19
1424610_at	43.743	down	Trub2	TruB pseudouridine (psi) synthase homolog 2 (E. coli)
1424611_x_at	60.15	down	Trub2	TruB pseudouridine (psi) synthase homolog 2 (E. coli)
1451408_at	2.44835	down	Trub2	TruB pseudouridine (psi) synthase homolog 2 (E. coli)
1424615_at	2.98639	down	Frag1	FGF receptor activating protein 1
1424616_s_at	2.3034	down	Frag1	FGF receptor activating protein 1
1424620_at	2.25234	down	Nop16	NOP16 nucleolar protein homolog (yeast)
1424628_a_at	2.55312	down	Ndufv3	NADH dehydrogenase (ubiquinone) flavoprotein 3
1424638_at	2.26901	down	Cdkn1a	cyclin-dependent kinase inhibitor 1A (P21)
1424643_at	2.22511	down	Tcof1	Treacher Collins Franceschetti syndrome 1
1424644_at	2.21647	down	Tbcc	tubulin-specific chaperone c
1451429_at	2.70085	down	Gfod2	glucose-fructose oxidoreductase domain containing 2
1451431_a_at	2.29447	down	Dbndd2	dysbindin (dystrobrevin binding protein 1) domain containing 2
1429850_x_at	3.99711	down	Alkbh4	alkB
1451432_x_at	2.17142	down	Alkbh4	alkB
1424662_at	3.91081	down	Pmpca	peptidase (mitochondrial processing) alpha
1436342_a_at	14.0323	down	Ubxn1	UBX domain protein 1
1451436_at	5.03506	down	Sbno1	sno
1451439_at	5.37826	down	BC027231	cDNA sequence BC027231
1424682_at	3.05751	down	Gpn3	GPN-loop GTPase 3
1455832_a_at	2.2017	down	Umps	uridine monophosphate synthetase
1451446_at	10.4163	down	Antxr1	anthrax toxin receptor 1
1424705_at	4.19035	down	Rbmx2	RNA binding motif protein
1424724_a_at	9.75316	down	D16Ertd472e	DNA segment
1424736_at	3.00891	down	Eef2	eukaryotic translation elongation factor 2
1424751_at	5.58682	down	Abt1	activator of basal transcription 1
1424771_at	10.0935	down	H2afj	H2A histone family
1424776_a_at	10.3769	down	Slc25a28	solute carrier family 25
1424786_s_at	15.6658	down	Wdr45	WD repeat domain 45
1453609_s_at	2.38253	down	Ccdc9	coiled-coil domain containing 9
1424814_a_at	2.27668	down	Bcl2l14	BCL2-like 14 (apoptosis facilitator)
1451495_at	2.02058	down	LOC100044766 /// Wac	similar to WW domain-containing adapter protein with coiled-coil /// WW domain containing adaptor with coiled-coil
1451508_at	71.145	down	Larp2	La ribonucleoprotein domain family
1451509_at	16.0342	down	Taf9	TAF9 RNA polymerase II
1424858_at	4.86674	down	L2hgdh	L-2-hydroxyglutarate dehydrogenase
1451524_at	2.11066	down	Fbxw2	F-box and WD-40 domain protein 2
1424887_at	2.38203	down	Klhdc4	kelch domain containing 4
1419819_s_at	3.48051	down	Sec63	SEC63-like (S. cerevisiae)
1451531_at	4.63965	down	Cbwd1	COBW domain containing 1
1425007_at	2.80943	down	Zfp566	zinc finger protein 566
1425014_at	2.45647	down	Nr2c2	nuclear receptor subfamily 2
1425021_a_at	3.7317	down	Pex16	peroxisomal biogenesis factor 16
1425030_at	7.95681	down	Zfp622	zinc finger protein 622
1425042_s_at	2.0067	down	Pelp1	proline
1425059_at	4.657	down	Prmt6	protein arginine N-methyltransferase 6
1425078_x_at	41.1832	down	C130026I21Rik /// LOC100041885	RIKEN cDNA C130026I21 gene /// similar to C130026I21Rik protein
1425082_s_at	4.27102	down	Pds5a	PDS5
1451587_a_at	14.7299	down	Tiprl	TIP41
1425114_at	3.78485	down	Rbbp6	retinoblastoma binding protein 6
1425139_at	2.82349	down	Sesn2	sestrin 2
1451599_at	4.12895	down	Sesn2	sestrin 2
1451602_at	15.8546	down	Snx6	sorting nexin 6
1425160_at	11.7906	down	AF067063	cDNA sequence AF067063
1451611_at	2.45848	down	Pla2g16	phospholipase A2
1425163_at	20.3355	down	AI661453	expressed sequence AI661453
1425179_at	6.48769	down	Shmt1	serine hydroxymethyltransferase 1 (soluble)
1425183_a_at	2.05972	down	Rpl4	ribosomal protein L4
1425197_at	3.18221	down	Ptpn2	protein tyrosine phosphatase
1451631_at	4.18439	down	Rprd1a	regulation of nuclear pre-mRNA domain containing 1A
1425220_x_at	4.52943	down	LOC100038935	hypothetical protein LOC100038935
1454074_a_at	6.06053	down	Rsrc2	arginine/serine-rich coiled-coil 2
1452497_a_at	2.18773	down	Nfatc3	nuclear factor of activated T-cells
1419976_s_at	6.24594	down	Nfatc3	nuclear factor of activated T-cells
1451641_at	6.916	down	Dbr1	debranching enzyme homolog 1 (S. cerevisiae)
1425271_at	4.29189	down	Psmc3ip	proteasome (prosome
1451645_at	2.23454	down	Fbrs	fibrosin
1425280_at	2.32068	down	Leng1	leukocyte receptor cluster (LRC) member 1
1425288_at	2.11361	down	Samd11	sterile alpha motif domain containing 11
1425305_at	2.34314	down	Zfp295	zinc finger protein 295
1425319_s_at	6.80482	down	Snrnp48	small nuclear ribonucleoprotein 48 (U11/U12)
1425328_at	6.63778	down	Fam76a	family with sequence similarity 76
1451667_at	2.57462	down	Fam20b	family with sequence similarity 20
1451668_at	2.63298	down	Fam20b	family with sequence similarity 20
1425333_at	6.05975	down	Rab43	RAB43
1451671_at	2.15663	down	Gorasp1	golgi reassembly stacking protein 1
1425349_a_at	3.18026	down	Myef2	myelin basic protein expression factor 2
1425354_a_at	4.17795	down	Aggf1	angiogenic factor with G patch and FHA domains 1
1425375_at	4.25575	down	Tdpoz1	TD and POZ domain containing 1
1425399_at	2.34638	down	Mfsd7b	major facilitator superfamily domain containing 7B
1425415_a_at	6.62619	down	Slc1a1	solute carrier family 1 (neuronal/epithelial high affinity glutamate transporter
1451703_s_at	12.2509	down	Aprt	adenine phosphoribosyl transferase
1425427_at	12.0833	down	LOC639910	hypothetical protein LOC639910
1451722_s_at	2.36455	down	Smyd5	SET and MYND domain containing 5
1451724_at	2.59916	down	Ankmy2	ankyrin repeat and MYND domain containing 2
1433698_a_at	6.29584	down	Txnl4a	thioredoxin-like 4A
1451731_at	2.12098	down	Abca3	ATP-binding cassette
1425497_a_at	4.2145	down	Prpf4b	PRP4 pre-mRNA processing factor 4 homolog B (yeast)
1425507_at	3.03076	down	Arfrp1	ADP-ribosylation factor related protein 1
1425508_s_at	3.0979	down	Arfrp1	ADP-ribosylation factor related protein 1
1427914_a_at	2.34519	down	LOC100045866 /// Tceb1	similar to elongation factor SIII p15 subunit /// transcription elongation factor B (SIII)
1451745_a_at	2.18262	down	Znhit1	zinc finger
1425537_at	11.2611	down	Ppm1a	protein phosphatase 1A
1425541_at	2.13113	down	Ddx27	DEAD (Asp-Glu-Ala-Asp) box polypeptide 27
1451762_a_at	2.09468	down	Kif1b	kinesin family member 1B
1451770_s_at	4.70883	down	Dhx9	DEAH (Asp-Glu-Ala-His) box polypeptide 9
1425632_a_at	2.80068	down	Pqlc2	PQ loop repeat containing 2
1425640_at	3.68273	down	Aff1	AF4/FMR2 family
1425729_at	2.22786	down	Best2	bestrophin 2
1426885_a_at	7.16283	down	Cdk2ap1 /// LOC100047490	CDK2 (cyclin-dependent kinase 2)-associated protein 1 /// similar to putative oral cancer suppressor
1425773_s_at	4.95477	down	Nmnat1	nicotinamide nucleotide adenylyltransferase 1
1425795_a_at	2.29837	down	Map3k7	mitogen-activated protein kinase kinase kinase 7
1425815_a_at	2.97868	down	Hmmr	hyaluronan mediated motility receptor (RHAMM)
1425820_x_at	4.40096	down	Gpatch4	G patch domain containing 4
1425848_a_at	6.37925	down	Dusp26	dual specificity phosphatase 26 (putative)
1451852_at	3.14093	down	Tcstv3	2-cell-stage
1425879_at	4.50015	down	Zfp352	zinc finger protein 352
1425880_x_at	7.61095	down	Zfp352	zinc finger protein 352
1425966_x_at	2.51318	down	Ubc	ubiquitin C
1425974_a_at	3.81968	down	Trim25	tripartite motif-containing 25
1425993_a_at	2.76357	down	Hsph1	heat shock 105kDa/110kDa protein 1
1455191_x_at	4.19372	down	Pip5k1a	phosphatidylinositol-4-phosphate 5-kinase
1460386_a_at	3.60176	down	Slc1a1	solute carrier family 1 (neuronal/epithelial high affinity glutamate transporter
1437758_a_at	2.13539	down	Slc4a1ap	solute carrier family 4 (anion exchanger)
1426065_a_at	2.3489	down	Trib3	tribbles homolog 3 (Drosophila)
1426084_a_at	5.11957	down	Tor1aip1	torsin A interacting protein 1
1426107_at	2.52803	down	Prdm9	PR domain containing 9
1451977_at	3.35634	down	Dyrk1a	dual-specificity tyrosine-(Y)-phosphorylation regulated kinase 1a
1426232_at	3.95986	down	BC024479	cDNA sequence BC024479
1426235_a_at	20.9696	down	Glul	glutamate-ammonia ligase (glutamine synthetase)
1426241_a_at	2.33412	down	Scmh1	sex comb on midleg homolog 1
1426256_at	9.00585	down	Timm17a	translocase of inner mitochondrial membrane 17a
1426259_at	3.88967	down	Pank3	pantothenate kinase 3
1426271_at	2.19383	down	Smc5	structural maintenance of chromosomes 5
1452012_a_at	4.33679	down	Exosc1	exosome component 1
1426311_s_at	2.67954	down	Zdhhc5	zinc finger
1426326_at	18.0314	down	Zfp91	zinc finger protein 91
1426327_s_at	5.5548	down	Cntf /// Zfp91 /// Zfp91-cntf	ciliary neurotrophic factor /// zinc finger protein 91 /// zinc finger protein 91
1452033_at	2.5804	down	Gle1	GLE1 RNA export mediator (yeast)
1426350_at	3.99196	down	Mgat2	mannoside acetylglucosaminyltransferase 2
1452037_at	15.8251	down	Mgat2	mannoside acetylglucosaminyltransferase 2
1452043_at	2.1051	down	2310011J03Rik	RIKEN cDNA 2310011J03 gene
1426366_at	6.80832	down	Eif2c2	eukaryotic translation initiation factor 2C
1426379_at	3.14058	down	Eif4b	eukaryotic translation initiation factor 4B
1426381_at	11.1508	down	Pprc1	peroxisome proliferative activated receptor
1452046_a_at	7.23952	down	Ppp1cc	protein phosphatase 1
1452047_at	8.67475	down	Cacybp	calcyclin binding protein
1452048_at	2.51975	down	Mrpl12	mitochondrial ribosomal protein L12
1426386_at	7.10338	down	Rpl7l1	ribosomal protein L7-like 1
1452049_at	12.058	down	Rpl7l1	ribosomal protein L7-like 1
1426387_x_at	2.23113	down	4933439C20Rik /// LOC236604 /// Pisd	RIKEN cDNA 4933439C20 gene /// phosphatidylserine decarboxylase pseudogene /// phosphatidylserine decarboxylase
1426394_at	3.61764	down	Eif3j	eukaryotic translation initiation factor 3
1452052_s_at	2.34582	down	Eif3j	eukaryotic translation initiation factor 3
1452058_a_at	10.7084	down	Rnf11	ring finger protein 11
1426414_a_at	4.59535	down	Rnf7	ring finger protein 7
1426415_a_at	2.01135	down	Trim25	tripartite motif-containing 25
1426426_at	19.8174	down	Mak16	MAK16 homolog (S. cerevisiae)
1452069_a_at	3.19904	down	Thap7	THAP domain containing 7
1452070_at	3.11742	down	Dedd2	death effector domain-containing DNA binding protein 2
1430053_a_at	3.50475	down	Ola1	Obg-like ATPase 1
1452084_at	2.60527	down	Zcchc17	zinc finger
1426475_at	2.25305	down	Hmbs	hydroxymethylbilane synthase
1426486_at	2.50526	down	Ubxn4	UBX domain protein 4
1426487_a_at	9.08338	down	Rbbp6	retinoblastoma binding protein 6
1452093_at	2.33373	down	Tmem185b	transmembrane protein 185B
1452095_a_at	2.43177	down	H47	histocompatibility 47
1452096_s_at	2.19891	down	D230025D16Rik	RIKEN cDNA D230025D16 gene
1426527_at	2.06371	down	Toe1	target of EGR1
1452100_at	2.56006	down	Dullard /// LOC100048221	Dullard homolog (Xenopus laevis) /// similar to Dullard homolog (Xenopus laevis)
1426559_at	3.176	down	Sbno1	sno
1452110_at	4.68195	down	Mtrr	5-methyltetrahydrofolate-homocysteine methyltransferase reductase
1426575_at	2.22835	down	Sgms1	sphingomyelin synthase 1
1426584_a_at	7.38467	down	Sord	sorbitol dehydrogenase
1426609_at	9.9847	down	Dis3	DIS3 mitotic control homolog (S. cerevisiae)
1426614_at	2.09371	down	Prkcbp1	protein kinase C binding protein 1
1426625_at	5.82496	down	Zfp623	zinc finger protein 623
1426626_at	3.13766	down	Gtf2f2	general transcription factor IIF
1426629_at	3.67416	down	Dhx8	DEAH (Asp-Glu-Ala-His) box polypeptide 8
1426644_at	7.10151	down	Tbc1d20	TBC1 domain family
1426646_at	5.97306	down	9130011J15Rik	RIKEN cDNA 9130011J15 gene
1426659_a_at	15.3616	down	100041163 /// 100041478 /// ENSMUSG00000063556 /// LOC100046821 /// Rpl23a	predicted gene
1426660_x_at	26.3387	down	100041163 /// 100041478 /// ENSMUSG00000063556 /// ENSMUSG00000071532 /// LOC100046821 /// Rpl23a	predicted gene
1426661_at	8.49482	down	EG665189 /// Rpl27a	predicted gene
1426667_a_at	20.3951	down	Unc84a	unc-84 homolog A (C. elegans)
1426674_at	2.64279	down	Eif3b	eukaryotic translation initiation factor 3
1426676_s_at	7.67436	down	Tomm70a	translocase of outer mitochondrial membrane 70 homolog A (yeast)
1426686_s_at	2.28782	down	Map3k3	mitogen-activated protein kinase kinase kinase 3
1436609_a_at	2.84413	down	Lrpap1	low density lipoprotein receptor-related protein associated protein 1
1426698_a_at	2.9444	down	Hnrnpm	heterogeneous nuclear ribonucleoprotein M
1426706_s_at	5.93451	down	Xylb	xylulokinase homolog (H. influenzae)
1426717_at	3.57284	down	Nipa2	non imprinted in Prader-Willi/Angelman syndrome 2 homolog (human)
1460396_at	9.32464	down	Ddx54	DEAD (Asp-Glu-Ala-Asp) box polypeptide 54
1426728_x_at	12.5434	down	Ptdss2	phosphatidylserine synthase 2
1452169_a_at	3.51081	down	Dgkz	diacylglycerol kinase zeta
1452171_at	2.06934	down	Grwd1	glutamate-rich WD repeat containing 1
1426746_at	3.08207	down	1810026J23Rik	RIKEN cDNA 1810026J23 gene
1452175_at	2.24607	down	1810026J23Rik	RIKEN cDNA 1810026J23 gene
1426753_at	2.02224	down	Phf17	PHD finger protein 17
1436803_a_at	5.381	down	Ndufb9	NADH dehydrogenase (ubiquinone) 1 beta subcomplex
1426764_at	4.12255	down	Oaz2	ornithine decarboxylase antizyme 2
1426765_at	4.46843	down	Commd7 /// LOC674161	COMM domain containing 7 /// similar to COMM domain-containing protein 7
1452186_at	10.583	down	Rbm5	RNA binding motif protein 5
1426769_s_at	2.25793	down	Maml1	mastermind like 1 (Drosophila)
1433890_a_at	2.13715	down	Bat3	HLA-B-associated transcript 3
1426783_at	2.64429	down	Kat2a	K(lysine) acetyltransferase 2A
1426785_s_at	2.09673	down	Mgll	monoglyceride lipase
1426787_at	3.63747	down	Sfi1	Sfi1 homolog
1426798_a_at	7.27964	down	Ppp1r15b	protein phosphatase 1
1426804_at	3.65526	down	Smarca4	SWI/SNF related
1426806_at	4.23043	down	Obfc2a	oligonucleotide/oligosaccharide-binding fold containing 2A
1426808_at	2.6039	down	Lgals3	lectin
1426810_at	3.27504	down	Jmjd1a	jumonji domain containing 1A
1426820_at	5.10724	down	2610507B11Rik	RIKEN cDNA 2610507B11 gene
1426832_at	2.0481	down	Ddx26b	DEAD/H (Asp-Glu-Ala-Asp/His) box polypeptide 26B
1426837_at	5.24386	down	Metap1	methionyl aminopeptidase 1
1426839_at	3.06381	down	Pold3	polymerase (DNA-directed)
1426846_at	3.65499	down	Cenpt	centromere protein T
1426853_at	4.50553	down	671392 /// Set	predicted gene
1426862_at	2.71887	down	Aftph	aftiphilin
1426890_a_at	2.86554	down	Rpap1	RNA polymerase II associated protein 1
1426894_s_at	2.61896	down	Fam102a	family with sequence similarity 102
1460400_at	7.828	down	Spast	spastin
1426921_at	2.90083	down	Abcf1	ATP-binding cassette
1420157_s_at	10.0831	down	Abcf1	ATP-binding cassette
1426931_s_at	2.54816	down	D19Bwg1357e	DNA segment
1426939_at	4.16715	down	Tsr2	TSR2
1426945_at	9.45686	down	Ipo5	importin 5
1452256_at	2.62845	down	1110002N22Rik	RIKEN cDNA 1110002N22 gene
1460402_at	2.68298	down	Brpf1	bromodomain and PHD finger containing
1452285_a_at	7.6306	down	Eif3f	eukaryotic translation initiation factor 3
1427032_at	2.88618	down	Herc4	hect domain and RLD 4
1427036_a_at	4.55474	down	Eif4g1	eukaryotic translation initiation factor 4
1427046_at	2.70478	down	Grhl2	grainyhead-like 2 (Drosophila)
1427055_at	2.28379	down	Them4	thioesterase superfamily member 4
1427071_at	3.13314	down	Fbxo42	F-box protein 42
1427087_at	3.7927	down	Luc7l2	LUC7-like 2 (S. cerevisiae)
1427093_at	4.41505	down	Zfp707	zinc finger protein 707
1427097_at	2.53451	down	Wwp1	WW domain containing E3 ubiquitin protein ligase 1
1452313_at	2.38823	down	5930416I19Rik	RIKEN cDNA 5930416I19 gene
1427117_at	2.18413	down	Mtmr3	myotubularin related protein 3
1427136_s_at	2.28486	down	Sfrs12	splicing factor
1427143_at	37.4855	down	Jarid1b	jumonji
1427158_at	4.01384	down	Mrps30	mitochondrial ribosomal protein S30
1452337_at	2.96888	down	4930427A07Rik	RIKEN cDNA 4930427A07 gene
1452340_at	4.20888	down	Zfp518b	zinc finger protein 518B
1427171_at	12.267	down	Rlf	rearranged L-myc fusion sequence
1427189_at	3.85154	down	Arih1	ariadne ubiquitin-conjugating enzyme E2 binding protein homolog 1 (Drosophila)
1427210_at	2.31726	down	Baz2a	bromodomain adjacent to zinc finger domain
1427218_at	7.26046	down	Klhl11	kelch-like 11 (Drosophila)
1427226_at	2.02865	down	Epn2	epsin 2
1427238_at	8.35175	down	Fbxo15	F-box protein 15
1452364_at	2.21469	down	Suz12	suppressor of zeste 12 homolog (Drosophila)
1427260_a_at	8.48098	down	Tpm3	tropomyosin 3
1452371_at	2.19337	down	Sfrs11	splicing factor
1427271_at	2.78885	down	Zbtb44	zinc finger and BTB domain containing 44
1427293_a_at	3.59342	down	Auts2	autism susceptibility candidate 2
1452388_at	3.2253	down	Hspa1a	heat shock protein 1A
1427333_s_at	2.09062	down	Sfrs15	splicing factor
1427364_a_at	14.5018	down	Odc1	ornithine decarboxylase
1454197_a_at	2.10604	down	Ccdc86	coiled-coil domain containing 86
1452414_s_at	4.76197	down	Ccdc86	coiled-coil domain containing 86
1452430_s_at	2.10397	down	LOC100048559 /// Sfrs1	similar to splicing factor
1427448_at	2.10821	down	Rabep1	rabaptin
1452439_s_at	6.13369	down	Sfrs2	splicing factor
1427479_at	4.36375	down	100039042 /// 100039129 /// 100042776 /// 627881 /// BB287469 /// EG266459 /// EG435337 /// EG544883 /// EG666806 /// EG666862 /// Eif1a /// LOC100039226 /// LOC640794 /// LOC641136	predicted gene
1452454_at	10.5761	down	Sdad1	SDA1 domain containing 1
1427603_at	4.26465	down	Atf7ip2	activating transcription factor 7 interacting protein 2
1427702_at	6.7501	down	Zfp1	zinc finger protein 1
1427718_a_at	3.10478	down	Mdm2	transformed mouse 3T3 cell double minute 2
1434416_a_at	13.1776	down	Solh	small optic lobes homolog (Drosophila)
1427785_x_at	5.84797	down	Solh	small optic lobes homolog (Drosophila)
1427820_at	4.2141	down
1427887_at	9.59121	down	Rprd1b	regulation of nuclear pre-mRNA domain containing 1B
1427896_at	2.84585	down	Suds3	suppressor of defective silencing 3 homolog (S. cerevisiae)
1427898_at	4.0142	down	Rnf6	ring finger protein (C3H2C3 type) 6
1427899_at	5.14709	down	Rnf6	ring finger protein (C3H2C3 type) 6
1433721_x_at	5.53237	down	Rps21	ribosomal protein S21
1427913_at	6.64108	down	Rwdd1	RWD domain containing 1
1427923_at	2.24339	down	Zmpste24	zinc metallopeptidase
1427929_a_at	11.0147	down	Pdxk	pyridoxal (pyridoxine
1427930_at	6.18767	down	Pdxk	pyridoxal (pyridoxine
1427931_s_at	95.6294	down	Pdxk	pyridoxal (pyridoxine
1452610_at	6.60732	down	Zkscan14	zinc finger with KRAB and SCAN domains 14
1452612_at	3.51195	down	Rnf160	ring finger protein 160
1427955_a_at	2.89736	down	Deb1	differentially expressed in B16F10 1
1427965_at	12.1822	down	Ssbp1	single-stranded DNA binding protein 1
1452616_s_at	9.14006	down	Ssbp1	single-stranded DNA binding protein 1
1427975_at	2.06683	down	Rasl10a	RAS-like
1452628_at	14.0491	down	Bag5 /// LOC100047042	BCL2-associated athanogene 5 /// similar to BCL2-associated athanogene 5
1427988_s_at	3.42183	down	Safb2	scaffold attachment factor B2
1452634_at	6.93338	down	Obox3	oocyte specific homeobox 3
1430147_a_at	2.1464	down	Taf1d	TATA box binding protein (Tbp)-associated factor
1452635_x_at	11.7025	down	Taf1d	TATA box binding protein (Tbp)-associated factor
1428004_at	4.70421	down	Snrnp25	small nuclear ribonucleoprotein 25 (U11/U12)
1428025_s_at	3.64679	down	Pitpnc1	phosphatidylinositol transfer protein
1428029_a_at	5.09385	down	H2afv	H2A histone family
1428046_a_at	3.11791	down	Zfx	zinc finger protein X-linked
1428047_s_at	3.1365	down	Zfa /// Zfx	zinc finger protein
1452648_at	5.25153	down	Tbrg1	transforming growth factor beta regulated gene 1
1452649_at	3.88965	down	Rtn4	reticulon 4
1428081_at	4.26566	down	Klhl21	kelch-like 21 (Drosophila)
1452660_s_at	2.59795	down	Klhl7	kelch-like 7 (Drosophila)
1460429_at	5.41322	down	Cdc5l	cell division cycle 5-like (S. pombe)
1452661_at	12.6232	down	Tfrc	transferrin receptor
1428095_a_at	2.0048	down	C2cd2l	C2 calcium-dependent domain containing 2-like
1428099_a_at	8.70513	down	LOC100048559 /// Sfrs1	similar to splicing factor
1428126_a_at	2.34671	down	ENSMUSG00000074747	predicted gene
1428133_at	3.95713	down	Snip1	Smad nuclear interacting protein 1
1452680_at	7.16327	down	Snrpd2	small nuclear ribonucleoprotein D2
1428161_a_at	2.27185	down	Chchd2 /// LOC100045688	coiled-coil-helix-coiled-coil-helix domain containing 2 /// similar to coiled-coil-helix-coiled-coil-helix domain containing 2
1452692_a_at	4.54935	down	Ndufv2	NADH dehydrogenase (ubiquinone) flavoprotein 2
1428179_at	3.71203	down	Ndufv2	NADH dehydrogenase (ubiquinone) flavoprotein 2
1452694_at	2.76436	down	Ip6k1	inositol hexaphosphate kinase 1
1428182_at	2.54161	down	Prpsap1	phosphoribosyl pyrophosphate synthetase-associated protein 1
1452705_at	2.48338	down	Pdxdc1	pyridoxal-dependent decarboxylase domain containing 1
1428201_at	3.61143	down	2310036O22Rik	RIKEN cDNA 2310036O22 gene
1428212_x_at	4.80001	down	EG665562 /// EG667682 /// ENSMUSG00000066956 /// LOC638399 /// LOC673582 /// LOC675018 /// Rpl31	predicted gene
1428215_x_at	2.40617	down	Tomm7	translocase of outer mitochondrial membrane 7 homolog (yeast)
1428218_a_at	12.7055	down	1600012H06Rik	RIKEN cDNA 1600012H06 gene
1428225_s_at	2.60969	down	Hnrpdl	heterogeneous nuclear ribonucleoprotein D-like
1428244_at	11.4291	down	Larp1	La ribonucleoprotein domain family
1452718_at	4.21246	down	Ubr5	ubiquitin protein ligase E3 component n-recognin 5
1428277_at	2.01347	down	Otud6b	OTU domain containing 6B
1428286_at	8.10809	down	2900097C17Rik	RIKEN cDNA 2900097C17 gene
1428288_at	9.10777	down	2310051E17Rik /// Klf9	RIKEN cDNA 2310051E17 gene /// Kruppel-like factor 9
1428289_at	4.13122	down	2310051E17Rik /// Klf9	RIKEN cDNA 2310051E17 gene /// Kruppel-like factor 9
1428296_at	4.52774	down	ENSMUSG00000074846 /// Polr2l /// Usp50	predicted gene
1452730_at	3.13163	down	Rps4y2	ribosomal protein S4
1428310_at	2.06412	down	Larp7	La ribonucleoprotein domain family
1428322_a_at	2.64346	down	Ndufb10	NADH dehydrogenase (ubiquinone) 1 beta subcomplex
1428331_at	4.24029	down	2210016F16Rik	RIKEN cDNA 2210016F16 gene
1453725_a_at	5.19639	down	Mrps7	mitchondrial ribosomal protein S7
1452767_at	5.50538	down	Rrbp1	ribosome binding protein 1
1428390_at	7.27883	down	Wdr43	WD repeat domain 43
1452776_a_at	2.60007	down	Nub1	negative regulator of ubiquitin-like proteins 1
1452777_a_at	20.4367	down	Nub1	negative regulator of ubiquitin-like proteins 1
1428448_a_at	2.15975	down	Gtf3c2 /// Mpv17	general transcription factor IIIC
1452784_at	3.35291	down	Itgav	integrin alpha V
1428494_a_at	5.04237	down	LOC100048301 /// Polr2i	similar to RNA Polymerase II subunit 14.5 kD /// polymerase (RNA) II (DNA directed) polypeptide I
1428511_at	2.73877	down	Phkg2	phosphorylase kinase
1428529_at	4.4492	down	2810026P18Rik	RIKEN cDNA 2810026P18 gene
1428530_x_at	6.15244	down	EG629116 /// EG668041 /// LOC677113 /// Rps24	predicted gene
1428532_at	2.66206	down	Ints7	integrator complex subunit 7
1452830_s_at	4.78116	down	Cad	carbamoyl-phosphate synthetase 2
1428543_at	13.8599	down	Ppat	phosphoribosyl pyrophosphate amidotransferase
1452831_s_at	2.21693	down	Ppat	phosphoribosyl pyrophosphate amidotransferase
1452844_at	2.46528	down	Pou6f1	POU domain
1428587_at	6.52586	down	Tmem41b	transmembrane protein 41B
1428588_a_at	39.2686	down	Mrpl41	mitochondrial ribosomal protein L41
1428589_at	7.53053	down	Mrpl41	mitochondrial ribosomal protein L41
1428657_at	4.72605	down	Rreb1	ras responsive element binding protein 1
1452880_at	8.73638	down	Znhit3	zinc finger
1452884_at	2.82083	down	Sfrs2ip	splicing factor
1428728_at	2.27349	down	Ddx51	DEAD (Asp-Glu-Ala-Asp) box polypeptide 51
1428742_at	5.22245	down	Fbxo45	F-box protein 45
1452895_at	4.04371	down	Fbxo45	F-box protein 45
1428788_at	2.47945	down	Pgp	phosphoglycolate phosphatase
1452919_a_at	15.2284	down	Pgp	phosphoglycolate phosphatase
1428844_a_at	15.6084	down	Bclaf1	BCL2-associated transcription factor 1
1428848_a_at	2.44986	down	Macf1	microtubule-actin crosslinking factor 1
1428869_at	12.5567	down	Nolc1	nucleolar and coiled-body phosphoprotein 1
1428882_at	11.8297	down	Wipi2	WD repeat domain
1428904_at	2.22258	down	Ammecr1l	AMME chromosomal region gene 1-like
1452954_at	2.76264	down	Ube2c	ubiquitin-conjugating enzyme E2C
1428908_at	2.94313	down	Rbm25	RNA binding motif protein 25
1428942_at	8.34873	down	Mt2	metallothionein 2
1433472_x_at	7.1849	down	EG664868 /// OTTMUSG00000009978 /// Rpl38	predicted gene
1452999_at	3.68362	down	Smndc1	survival motor neuron domain containing 1
1429077_x_at	10.0236	down	EG433125 /// ENSMUSG00000058640 /// ENSMUSG00000061115 /// ENSMUSG00000066180 /// ENSMUSG00000066443 /// ENSMUSG00000068397 /// LOC100042767 /// LOC100043646 /// LOC100044606 /// LOC100045641 /// LOC100046290 /// LOC100047019 /// LOC100047314 /// LOC10004	predicted gene
1429103_at	3.32709	down	Tomm22	translocase of outer mitochondrial membrane 22 homolog (yeast)
1453030_at	3.48014	down	Msl2	male-specific lethal 2 homolog (Drosophila)
1429193_at	2.24892	down	Ankib1	ankyrin repeat and IBR domain containing 1
1429295_s_at	4.70866	down	Trip13	thyroid hormone receptor interactor 13
1453096_x_at	5.99711	down	EG621100 /// EG622236 /// OTTMUSG00000001643 /// Rpl27	predicted gene
1429321_at	4.13151	down	Rnf149	ring finger protein 149
1453124_at	5.33663	down	Tnpo3	transportin 3
1419950_s_at	29.0726	down	Tnpo3	transportin 3
1429388_at	4.62325	down	Nanog /// Nanogpd	Nanog homeobox /// similar to Nanog homeobox
1429483_at	28.1835	down	Calcoco2	calcium binding and coiled-coil domain 2
1429597_at	24.0324	down	Dppa4	developmental pluripotency associated 4
1429623_at	4.6362	down	Zfp644	zinc finger protein 644
1419984_s_at	13.4461	down	Zfp644	zinc finger protein 644
1429650_at	2.51823	down	Stk40	serine/threonine kinase 40
1429654_at	9.81249	down	Dppa2	developmental pluripotency associated 2
1453223_s_at	2.13127	down	Dppa2	developmental pluripotency associated 2
1453256_at	2.01425	down	Polr3c	polymerase (RNA) III (DNA directed) polypeptide C
1429758_at	2.03457	down	1700017B05Rik	RIKEN cDNA 1700017B05 gene
1453281_at	2.62248	down	Pik3cd	phosphatidylinositol 3-kinase catalytic delta polypeptide
1429819_at	2.60577	down	Nmnat1	nicotinamide nucleotide adenylyltransferase 1
1429859_a_at	2.51248	down	Arl2bp	ADP-ribosylation factor-like 2 binding protein
1435873_a_at	18.0608	down	Rpl13a /// Zfp526	ribosomal protein L13a /// zinc finger protein 526
1455485_x_at	17.1043	down	Rpl13a	ribosomal protein L13a
1455936_a_at	2.72869	down	Rbpms	RNA binding protein gene with multiple splicing
1429982_at	4.98995	down	Rimklb	ribosomal modification protein rimK-like family member B
1453369_a_at	2.79853	down	Fundc1	FUN14 domain containing 1
1430125_s_at	3.57965	down	Pqlc1	PQ loop repeat containing 1
1430271_x_at	3.39124	down	Taf1d	TATA box binding protein (Tbp)-associated factor
1430519_a_at	2.17819	down	Cnot7	CCR4-NOT transcription complex
1453589_a_at	4.61974	down	6820431F20Rik	RIKEN cDNA 6820431F20 gene
1430978_at	5.08537	down	Rps25	ribosomal protein S25
1430982_at	2.41385	down	LOC100048559 /// Sfrs1	similar to splicing factor
1453722_s_at	5.49199	down	LOC100048559 /// Sfrs1	similar to splicing factor
1431008_at	3.65225	down	0610037M15Rik /// H2-gs10 /// H2-L /// H2-Q1 /// H2-Q6 /// LOC100044307 /// LOC676708	RIKEN cDNA 0610037M15 gene /// MHC class I like protein GS10 /// histocompatibility 2
1431020_a_at	2.60727	down	Fgfr1op2	FGFR1 oncogene partner 2
1453752_at	2.98034	down	Rpl17	ribosomal protein L17
1431086_s_at	2.51202	down	Pcmt1	protein-L-isoaspartate (D-aspartate) O-methyltransferase 1
1431166_at	2.24594	down	Chd1	chromodomain helicase DNA binding protein 1
1431349_at	2.07969	down	Hnrnpab	heterogeneous nuclear ribonucleoprotein A/B
1453849_s_at	8.05341	down	Hnrnpab	heterogeneous nuclear ribonucleoprotein A/B
1431385_a_at	2.09006	down	Mbtps1	membrane-bound transcription factor peptidase
1454018_at	2.67329	down	Tlk2	tousled-like kinase 2 (Arabidopsis)
1454144_a_at	2.27526	down	Ccnc	cyclin C
1432827_x_at	4.42696	down	Gm1821 /// LOC100048105 /// Rps27a /// Ubb /// Ubc	gene model 1821
1454373_x_at	2.74696	down	Ubc	ubiquitin C
1433430_s_at	2.21209	down	Cdc23	CDC23 (cell division cycle 23
1433432_x_at	2.46758	down	OTTMUSG00000027340 /// Rps12	predicted gene
1433447_x_at	4.26481	down	Cct4	chaperonin containing Tcp1
1454605_a_at	3.31684	down	LOC100047707 /// Pi4k2a	hypothetical protein LOC100047707 /// phosphatidylinositol 4-kinase type 2 alpha
1454607_s_at	61.0818	down	Psat1	phosphoserine aminotransferase 1
1433479_at	2.75385	down	Ubr7	ubiquitin protein ligase E3 component n-recognin 7 (putative)
1437052_s_at	3.40689	down	Slc2a3	solute carrier family 2 (facilitated glucose transporter)
1455898_x_at	6.41399	down	Slc2a3	solute carrier family 2 (facilitated glucose transporter)
1454620_x_at	15.5087	down	EG624159 /// EG667717 /// LOC100043734 /// LOC236932 /// LOC639593 /// OTTMUSG00000000379 /// OTTMUSG00000013244 /// OTTMUSG00000015767 /// Rps6	predicted gene
1454627_a_at	6.19446	down	433941 /// 622707 /// EG666413 /// EG666642 /// ENSMUSG00000074516 /// LOC100044494 /// OTTMUSG00000006886 /// OTTMUSG00000008034 /// OTTMUSG00000014710 /// Rpl29	predicted gene
1433502_s_at	2.18509	down	Tsr1	TSR1
1433510_x_at	13.6839	down	100043718 /// LOC100048508 /// OTTMUSG00000012957 /// Rpl36	predicted gene
1433513_x_at	2.02312	down	Ndufa12	NADH dehydrogenase (ubiquinone) 1 alpha subcomplex
1454632_at	2.49986	down	6330442E10Rik	RIKEN cDNA 6330442E10 gene
1454639_x_at	2.10569	down	2210411K19Rik /// Rpl41	RIKEN cDNA 2210411K19 gene /// ribosomal protein L41
1433534_a_at	2.11384	down	Cct2	chaperonin containing Tcp1
1433535_x_at	2.19184	down	Cct2	chaperonin containing Tcp1
1460543_x_at	14.4711	down	100042986 /// OTTMUSG00000015874 /// Rpl37a	predicted gene
1433549_x_at	4.56827	down	Rps21	ribosomal protein S21
1433552_a_at	5.18236	down	Polr2b	polymerase (RNA) II (DNA directed) polypeptide B
1433569_x_at	2.0784	down	LOC100045999 /// Ran	similar to RAN
1433597_at	5.00269	down	Arglu1	arginine and glutamate rich 1
1433611_s_at	3.37504	down	Bud31	BUD31 homolog (yeast)
1433613_at	7.90488	down	Pank3	pantothenate kinase 3
1454663_at	10.5858	down	Eif5	eukaryotic translation initiation factor 5
1433654_at	2.70557	down	Mgea5	meningioma expressed antigen 5 (hyaluronidase)
1433656_a_at	10.8134	down	Gnl3	guanine nucleotide binding protein-like 3 (nucleolar)
1433663_s_at	7.85394	down	AU014645	expressed sequence AU014645
1433674_a_at	2.58346	down	Snhg1	small nucleolar RNA host gene (non-protein coding) 1
1433688_x_at	6.2775	down	Rpl14	ribosomal protein L14
1433706_a_at	3.90435	down	Ptplad1	protein tyrosine phosphatase-like A domain containing 1
1454698_at	2.00033	down	Ptplad1	protein tyrosine phosphatase-like A domain containing 1
1436924_x_at	5.70863	down	EG665562 /// EG667682 /// EG668850 /// ENSMUSG00000066956 /// Ero1l /// LOC638399 /// LOC673582 /// LOC675018 /// OTTMUSG00000009823 /// Rpl31	predicted gene
1433711_s_at	3.99433	down	LOC100047324 /// Sesn1	similar to Sesn1 protein /// sestrin 1
1433723_s_at	2.40571	down	Serf2	small EDRK-rich factor 2
1433736_at	2.0198	down	Hcfc1	host cell factor C1
1454714_x_at	8.32101	down	EG665516 /// EG666036 /// EG668771 /// Phgdh	predicted gene
1460548_a_at	2.0524	down	Eral1	Era (G-protein)-like 1 (E. coli)
1433765_at	2.21954	down	Ube2o	ubiquitin-conjugating enzyme E2O
1433797_at	2.44262	down	E130309D02Rik	RIKEN cDNA E130309D02 gene
1433816_at	3.40742	down	Mcart1	mitochondrial carrier triple repeat 1
1454738_x_at	3.05995	down	Pex6	peroxisomal biogenesis factor 6
1433878_at	4.99136	down	Mrps26	mitochondrial ribosomal protein S26
1433886_at	4.72849	down	Eif2b5	eukaryotic translation initiation factor 2B
1433908_a_at	5.0992	down	Cttn	cortactin
1454778_x_at	2.84753	down	ENSMUSG00000072940 /// Rps28	predicted gene
1454779_s_at	2.80389	down	C230052I12Rik	RIKEN cDNA C230052I12 gene
1433984_a_at	32.6059	down	Mdh2	malate dehydrogenase 2
1434003_a_at	3.34005	down	Dhps	deoxyhypusine synthase
1434011_a_at	5.64248	down	Ints5	integrator complex subunit 5
1454796_at	18.5508	down	Ficd	FIC domain containing
1434025_at	8.76725	down
1454802_x_at	36.0107	down	Arih2	ariadne homolog 2 (Drosophila)
1454805_at	4.65457	down	Wtap	Wilms' tumour 1-associating protein
1434053_x_at	2.02913	down	Atp5k	ATP synthase
1454813_at	2.40335	down	Ccdc72	coiled-coil domain containing 72
1454814_s_at	5.87695	down	AU021838	expressed sequence AU021838
1434087_at	5.05643	down	Mthfr	5
1434113_a_at	13.256	down	Rexo4	REX4
1434117_at	2.07237	down	Tceb3	transcription elongation factor B (SIII)
1434124_x_at	3.69199	down	2400001E08Rik	RIKEN cDNA 2400001E08 gene
1434143_at	2.19658	down	Atmin	ATM interactor
1454856_x_at	4.39086	down	100038991 /// Rpl35	predicted gene
1454859_a_at	8.49175	down	Rpl23	ribosomal protein L23
1454870_x_at	3.20586	down	Gpr172b	G protein-coupled receptor 172B
1434176_x_at	2.32559	down	Poldip3	polymerase (DNA-directed)
1434206_s_at	2.01438	down	Ppp2r5c	protein phosphatase 2
1434213_x_at	2.55487	down	Ndufs8	NADH dehydrogenase (ubiquinone) Fe-S protein 8
1434215_at	3.28903	down	B230308N11Rik	RIKEN cDNA B230308N11 gene
1434224_at	3.84992	down	Tbl2	transducin (beta)-like 2
1434239_at	5.32277	down	Rrp12	ribosomal RNA processing 12 homolog (S. cerevisiae)
1454887_at	2.64593	down	Pak2	p21 (CDKN1A)-activated kinase 2
1434251_at	2.45601	down	Cnot1	CCR4-NOT transcription complex
1434254_at	6.07449	down	Gna11	guanine nucleotide binding protein
1454890_at	2.68001	down	Amot	angiomotin
1434306_at	3.21394	down	Rab3ip	RAB3A interacting protein
1434320_at	4.87603	down	Gtf3c4	general transcription factor IIIC
1454929_s_at	2.0445	down	Safb	scaffold attachment factor B
1434358_x_at	6.51712	down	Rps21	ribosomal protein S21
1434412_x_at	2.53087	down	Stub1	STIP1 homology and U-Box containing protein 1
1434420_x_at	9.04642	down	Tomm22	translocase of outer mitochondrial membrane 22 homolog (yeast)
1434425_at	4.10519	down	Tchh	trichohyalin
1434435_s_at	3.22252	down	Cox17	cytochrome c oxidase
1454955_at	11.3135	down	Ipo7	importin 7
1454964_at	2.36678	down	Rprd1a	regulation of nuclear pre-mRNA domain containing 1A
1437525_a_at	3.42158	down	Polr3a	polymerase (RNA) III (DNA directed) polypeptide A
1434483_at	4.98718	down	Usp12	ubiquitin specific peptidase 12
1434500_at	2.07131	down	Ttyh2	tweety homolog 2 (Drosophila)
1438000_x_at	116.873	down	Zfp622	zinc finger protein 622
1455002_at	2.8614	down	Ptp4a1	protein tyrosine phosphatase 4a1
1455008_at	2.22161	down
1434543_a_at	20.1138	down	Bola2	bolA-like 2 (E. coli)
1434544_at	5.76528	down	Bola2	bolA-like 2 (E. coli)
1434545_x_at	6.59637	down	Bola2	bolA-like 2 (E. coli)
1434546_at	2.71991	down	Smg5	Smg-5 homolog
1455013_at	3.30562	down	Arih2	ariadne homolog 2 (Drosophila)
1434578_x_at	2.15291	down	LOC100045999 /// Ran	similar to RAN
1434579_x_at	6.27578	down	Ndufs8	NADH dehydrogenase (ubiquinone) Fe-S protein 8
1434586_a_at	13.3154	down	Ptdss2	phosphatidylserine synthase 2
1434587_x_at	13.4575	down	Ptdss2	phosphatidylserine synthase 2
1434606_at	4.20969	down	Erbb3	v-erb-b2 erythroblastic leukemia viral oncogene homolog 3 (avian)
1434607_at	3.11397	down	Ddx52	DEAD (Asp-Glu-Ala-Asp) box polypeptide 52
1434608_at	2.63374	down	Ddx52	DEAD (Asp-Glu-Ala-Asp) box polypeptide 52
1434618_at	2.87472	down	Crebzf	CREB/ATF bZIP transcription factor
1434624_x_at	26.3635	down	Rps9	ribosomal protein S9
1434633_at	3.02029	down	Crebbp	CREB binding protein
1455035_s_at	13.9663	down	Nol5a	nucleolar protein 5A
1434648_a_at	11.8022	down	Ccm2	cerebral cavernous malformation 2 homolog (human)
1449738_s_at	5.1668	down	D3Ertd300e	DNA segment
1434688_x_at	10.7682	down	Drg1	developmentally regulated GTP binding protein 1
1434690_at	10.9035	down	Lclat1	lysocardiolipin acyltransferase 1
1455065_x_at	3.84463	down	Gnpda1	glucosamine-6-phosphate deaminase 1
1455077_a_at	2.41365	down	Morf4l1	mortality factor 4 like 1
1434732_x_at	3.56171	down	Tomm7	translocase of outer mitochondrial membrane 7 homolog (yeast)
1434743_x_at	4.30606	down	Rusc1	RUN and SH3 domain containing 1
1434744_at	6.20318	down	Yrdc	yrdC domain containing (E.coli)
1434820_s_at	2.3062	down	Pkig	protein kinase inhibitor
1434851_s_at	3.80749	down	Crb3	crumbs homolog 3 (Drosophila)
1434854_a_at	9.39982	down	Rps10	ribosomal protein S10
1455152_at	2.9657	down	AI462493	expressed sequence AI462493
1434941_s_at	3.655	down	Esf1	ESF1
1434942_at	2.74687	down	Esf1	ESF1
1434972_x_at	15.0027	down	LOC100048559 /// Sfrs1	similar to splicing factor
1434975_x_at	5.64345	down	4933439C20Rik	RIKEN cDNA 4933439C20 gene
1434976_x_at	2.32237	down	Eif4ebp1	eukaryotic translation initiation factor 4E binding protein 1
1455171_at	6.22016	down	Suv420h1	suppressor of variegation 4-20 homolog 1 (Drosophila)
1435019_at	4.02738	down	Atxn7l3	ataxin 7-like 3
1435057_x_at	17.055	down	Polr1e	polymerase (RNA) I polypeptide E
1435509_x_at	20.4179	down	Cdk2ap1 /// LOC100047490	CDK2 (cyclin-dependent kinase 2)-associated protein 1 /// similar to putative oral cancer suppressor
1435067_at	2.09111	down	B230208H17Rik	RIKEN cDNA B230208H17 gene
1435113_x_at	10.486	down	Stmn3	stathmin-like 3
1435176_a_at	2.30156	down	Id2	inhibitor of DNA binding 2
1460581_a_at	39.6098	down	EG280047 /// EG668182 /// ENSMUSG00000059776 /// LOC674921 /// LOC675192 /// OTTMUSG00000009186 /// OTTMUSG00000025606 /// Rpl13	predicted gene
1455245_x_at	25.6207	down	ENSMUSG00000059776 /// OTTMUSG00000009186 /// OTTMUSG00000025606 /// Rpl13	predicted gene
1435231_at	6.48716	down	Coq4	coenzyme Q4 homolog (yeast)
1435232_x_at	4.18084	down	Mrpl15	mitochondrial ribosomal protein L15
1455283_x_at	6.57002	down	Ndufs8	NADH dehydrogenase (ubiquinone) Fe-S protein 8
1435321_at	4.61626	down	Limch1	LIM and calponin homology domains 1
1435364_at	2.08684	down	Cyhr1	cysteine and histidine rich 1
1435368_a_at	2.52746	down	Parp1	poly (ADP-ribose) polymerase family
1435372_a_at	62.1033	down	Pa2g4	proliferation-associated 2G4
1435395_s_at	2.07678	down	Atp5j2	ATP synthase
1435417_at	2.16165	down	AI464131	expressed sequence AI464131
1455316_x_at	20.6249	down	LOC280487	pol polyprotein
1455319_x_at	9.42152	down	OTTMUSG00000016616 /// OTTMUSG00000022847 /// Rps8	predicted gene
1435458_at	2.33522	down	Pim1	proviral integration site 1
1455348_x_at	3.5078	down	433941 /// 622707 /// EG666642 /// ENSMUSG00000074516 /// LOC100044494 /// OTTMUSG00000014710 /// Rpl29	predicted gene
1435518_at	3.63478	down	LOC100048397 /// Rap1b	similar to GTP-binding protein (smg p21B) /// RAS related protein 1b
1435526_at	2.43945	down	Tor1aip2	torsin A interacting protein 2
1435534_a_at	61.1457	down	Tomm20	translocase of outer mitochondrial membrane 20 homolog (yeast)
1455357_x_at	105.779	down	Tomm20	translocase of outer mitochondrial membrane 20 homolog (yeast)
1435593_x_at	3.52807	down	Rps7	ribosomal protein S7
1455384_x_at	41.5478	down	D030056L22Rik	RIKEN cDNA D030056L22 gene
1435725_x_at	9.84617	down	EG241053 /// EG546659 /// EG622098 /// EG622589 /// EG633570 /// LOC546695 /// LOC630855 /// LOC639477 /// OTTMUSG00000000910 /// Rpl12	predicted gene
1435734_x_at	3.01209	down	Dus1l	dihydrouridine synthase 1-like (S. cerevisiae)
1435735_x_at	175.1	down	H47	histocompatibility 47
1435742_at	3.78771	down	Smek1	SMEK homolog 1
1435782_at	14.4471	down	OTTMUSG00000007754	predicted gene
1435791_x_at	3.26879	down	ENSMUSG00000066475 /// ENSMUSG00000067748 /// ENSMUSG00000070510 /// LOC100041933 /// LOC100045527 /// LOC100046300 /// LOC100047874 /// Rpl17	predicted gene
1435803_a_at	16.1169	down	Eif4e2	eukaryotic translation initiation factor 4E member 2
1435816_at	5.994	down	EG216036 /// EG624159 /// EG667717 /// EG668387 /// LOC100043734 /// LOC236932 /// LOC623245 /// LOC639593 /// LOC675985 /// OTTMUSG00000000379 /// OTTMUSG00000005704 /// OTTMUSG00000013244 /// OTTMUSG00000015767 /// Rps6	predicted gene
1435817_x_at	7.88731	down	EG216036 /// EG624159 /// EG667717 /// EG668387 /// LOC100043734 /// LOC236932 /// LOC623245 /// LOC639593 /// LOC675985 /// OTTMUSG00000000379 /// OTTMUSG00000005704 /// OTTMUSG00000013244 /// OTTMUSG00000015767 /// Rps6	predicted gene
1435821_s_at	12.3393	down	Ppp1r8	protein phosphatase 1
1435824_at	3.25721	down	Yy1	YY1 transcription factor
1435834_at	5.0563	down	Fancf	Fanconi anemia
1438554_x_at	10.7951	down	Eif4h	eukaryotic translation initiation factor 4H
1435859_x_at	4.63103	down	Psmc2	proteasome (prosome
1435860_at	32.1593	down	Slc5a6	solute carrier family 5 (sodium-dependent vitamin transporter)
1435864_a_at	3.32534	down	1810063B05Rik	RIKEN cDNA 1810063B05 gene
1455488_at	6.76433	down	6230416J20Rik	RIKEN cDNA 6230416J20 gene
1435898_x_at	2.63818	down	Gdi2	guanosine diphosphate (GDP) dissociation inhibitor 2
1455504_a_at	117.556	down	Mkrn1	makorin
1455517_at	2.12428	down	Rbm4	RNA binding motif protein 4
1435995_at	3.47487	down	Mrpl22	mitochondrial ribosomal protein L22
1435998_at	3.04459	down	Ccnb1ip1	cyclin B1 interacting protein 1
1436016_x_at	2.51638	down	Gdi2	guanosine diphosphate (GDP) dissociation inhibitor 2
1436048_at	4.05814	down	Exoc8	exocyst complex component 8
1436049_at	3.97381	down	Tox4	TOX high mobility group box family member 4
1455550_x_at	2.3118	down	Serinc3	serine incorporator 3
1436064_x_at	15.9227	down	EG629116 /// LOC677113 /// Rps24	predicted gene
1455572_x_at	9.54304	down	LOC100042388 /// LOC100047329 /// LOC100047828 /// OTTMUSG00000000655 /// Rps18	similar to ribosomal protein S18 /// similar to ribosomal protein S18 /// similar to ribosomal protein /// predicted gene
1436158_at	15.4289	down	Eif4ebp2	eukaryotic translation initiation factor 4E binding protein 2
1455578_x_at	8.36423	down	Rpl41	ribosomal protein L41
1436234_at	2.00926	down	4732471D19Rik	RIKEN cDNA 4732471D19 gene
1436235_x_at	2.34806	down	4732471D19Rik	RIKEN cDNA 4732471D19 gene
1436236_x_at	2.34362	down	Cotl1	coactosin-like 1 (Dictyostelium)
1436298_x_at	5.30318	down	Paics	phosphoribosylaminoimidazole carboxylase
1436336_at	2.25296	down	Ptrh1	peptidyl-tRNA hydrolase 1 homolog (S. cerevisiae)
1436351_at	2.48668	down	Coq3	coenzyme Q3 homolog
1436366_at	2.92521	down	Ppp1r15b	protein phosphatase 1
1436420_a_at	14.1863	down	Ipo4	importin 4
1455693_x_at	14.6494	down	LOC100043734 /// LOC236932 /// OTTMUSG00000000379 /// OTTMUSG00000013244 /// Rps6	similar to ribosomal protein S6 /// similar to 40S ribosomal protein S6 /// predicted gene
1455696_a_at	7.4387	down	Prpf4b	PRP4 pre-mRNA processing factor 4 homolog B (yeast)
1460605_at	61.696	down	Crxos1	Crx opposite strand transcript 1
1436454_x_at	2.50656	down	Fen1	flap structure specific endonuclease 1
1436506_a_at	3.46183	down	Snhg6	small nucleolar RNA host gene (non-protein coding) 6
1436522_at	21.0958	down	Map3k3	mitogen-activated protein kinase kinase kinase 3
1436547_at	7.26706	down	Dgke	diacylglycerol kinase
1455742_x_at	2.02332	down	Morf4l1	mortality factor 4 like 1
1436688_x_at	6.37644	down	Rpl14	ribosomal protein L14
1436693_x_at	2.29156	down	Slc35e4	solute carrier family 35
1436699_x_at	26.3279	down	LOC100048449 /// Rpl18	similar to ribosomal protein L18 /// ribosomal protein L18
1455788_x_at	4.84083	down	Poldip3	polymerase (DNA-directed)
1436703_x_at	16.6795	down	Snapc2	small nuclear RNA activating complex
1455789_x_at	2.57376	down	Hspa8	heat shock protein 8
1436715_s_at	3.6027	down	Cdipt	CDP-diacylglycerol--inositol 3-phosphatidyltransferase (phosphatidylinositol synthase)
1436747_at	11.3061	down	Fam100b	family with sequence similarity 100
1455806_x_at	2.0034	down	Ndufa12	NADH dehydrogenase (ubiquinone) 1 alpha subcomplex
1455809_x_at	5.74726	down	Ric8	resistance to inhibitors of cholinesterase 8 homolog (C. elegans)
1436771_x_at	4.31373	down	Pgd	phosphogluconate dehydrogenase
1455821_x_at	2.61975	down	C1qbp	complement component 1
1436801_x_at	2.64913	down	Cdc42ep4	CDC42 effector protein (Rho GTPase binding) 4
1436804_s_at	2.8656	down	Scyl1	SCY1-like 1 (S. cerevisiae)
1436816_at	8.01336	down	Nup133	nucleoporin 133
1436822_x_at	4.62889	down	100043273 /// EG620155 /// ENSMUSG00000066475 /// ENSMUSG00000067748 /// ENSMUSG00000069392 /// ENSMUSG00000072489 /// Hk1 /// LOC100045527 /// LOC100048040 /// Rpl17	predicted gene
1436838_x_at	3.13628	down	Cotl1	coactosin-like 1 (Dictyostelium)
1436840_x_at	14.475	down	100038991 /// Rpl35	predicted gene
1455826_a_at	2.6511	down	Bace1	beta-site APP cleaving enzyme 1
1436856_x_at	2.59886	down	Tars2	threonyl-tRNA synthetase 2
1455836_at	3.27372	down	Papola	poly (A) polymerase alpha
1455841_s_at	6.31202	down	Grwd1	glutamate-rich WD repeat containing 1
1436887_x_at	3.14613	down	Grwd1	glutamate-rich WD repeat containing 1
1455855_x_at	2.11212	down	Hnrnpab	heterogeneous nuclear ribonucleoprotein A/B
1436930_x_at	9.42955	down	EG623818 /// Hmbs	predicted gene
1455858_x_at	2.51532	down	Pomc	pro-opiomelanocortin-alpha
1436935_x_at	3.3976	down	Clns1a	chloride channel
1436944_x_at	5.26204	down	4933439C20Rik /// LOC236604 /// Pisd	RIKEN cDNA 4933439C20 gene /// phosphatidylserine decarboxylase pseudogene /// phosphatidylserine decarboxylase
1436949_a_at	11.289	down	LOC638798 /// LOC677628 /// OTTMUSG00000000777 /// Tceb2	similar to transcription elongation factor B (SIII)
1436953_at	4.6384	down	Wipf1	WAS/WASL interacting protein family
1436958_x_at	2.89956	down	Tpm3	Tropomyosin 5 (3'UTR)
1436959_x_at	3.78543	down	Nelf	nasal embryonic LHRH factor
1437163_x_at	4.95553	down	Gtf2h4	general transcription factor II H
1436990_s_at	4.06442	down	Chchd10	coiled-coil-helix-coiled-coil-helix domain containing 10
1436995_a_at	24.6136	down	Rpl26	ribosomal protein L26
1437004_at	36.0248	down	EG547109	predicted gene
1437005_a_at	17.3989	down	Rpl18	ribosomal protein L18
1437007_x_at	2.4625	down	Usp39	ubiquitin specific peptidase 39
1437024_at	2.10727	down	Smpd4	sphingomyelin phosphodiesterase 4
1437026_at	2.75316	down	BC057893	cDNA sequence BC057893
1437044_a_at	8.39154	down	Gba	glucosidase
1455899_x_at	47.916	down	Socs3	suppressor of cytokine signaling 3
1455911_x_at	5.15152	down	Ndufb11	NADH dehydrogenase (ubiquinone) 1 beta subcomplex
1437080_s_at	2.18129	down	OTTMUSG00000015538 /// Psmd11	predicted gene
1437100_x_at	16.4003	down	Pim3	proviral integration site 3
1437102_at	5.75343	down	Ythdf1	YTH domain family 1
1438170_x_at	3.82241	down	Adrm1	adhesion regulating molecule 1
1437141_x_at	2.63386	down	Dym	dymeclin
1437143_a_at	6.66423	down	Txndc1	thioredoxin domain containing 1
1455928_x_at	6.2696	down	Lztr1	leucine-zipper-like transcriptional regulator
1437144_x_at	3.50872	down	Psma6	proteasome (prosome
1437155_a_at	3.78622	down	Wwtr1	WW domain containing transcription regulator 1
1437159_at	13.7797	down	Glb1	galactosidase
1437164_x_at	2.6767	down	Atp5o /// EG432676 /// LOC100047429	ATP synthase
1437185_s_at	3.67207	down	ENSMUSG00000050347 /// LOC100048142 /// Tmsb10	predicted gene
1455950_x_at	15.4424	down	100038991 /// Rpl35	predicted gene
1437194_x_at	2.94125	down	Lrwd1	leucine-rich repeats and WD repeat domain containing 1
1437220_x_at	2.54131	down	Psmd13	26S proteasome subunit p40.5
1437226_x_at	2.56984	down	Marcksl1	MARCKS-like 1
1437239_x_at	2.63918	down	Phc2	polyhomeotic-like 2 (Drosophila)
1455981_at	9.2864	down	EG216036 /// EG624159 /// EG668387 /// LOC100043734 /// LOC236932 /// LOC623245 /// LOC639593 /// LOC675985 /// OTTMUSG00000000379 /// OTTMUSG00000005704 /// OTTMUSG00000013244 /// OTTMUSG00000015767 /// Rps6	predicted gene
1437246_x_at	5.50301	down	EG216036 /// EG624159 /// EG668387 /// LOC100043734 /// LOC236932 /// LOC623245 /// LOC639593 /// LOC675985 /// OTTMUSG00000000379 /// OTTMUSG00000005704 /// OTTMUSG00000013244 /// OTTMUSG00000015767 /// Rps6	predicted gene
1455987_at	2.03725	down	Sec61a1	Sec61 alpha 1 subunit (S. cerevisiae)
1437301_a_at	9.29695	down	Dvl1	dishevelled
1437308_s_at	2.36401	down	F2r	coagulation factor II (thrombin) receptor
1455997_a_at	2.35885	down	100040778 /// Uqcrb	predicted gene
1437313_x_at	6.17365	down	Hmgb2	high mobility group box 2
1456003_a_at	2.07292	down	Slc1a4	solute carrier family 1 (glutamate/neutral amino acid transporter)
1437335_x_at	4.55425	down	Poldip3	polymerase (DNA-directed)
1437336_x_at	5.80527	down	LOC100047839 /// Tomm6	hypothetical protein LOC100047839 /// translocase of outer mitochondrial membrane 6 homolog (yeast)
1456014_s_at	2.86503	down	Fermt3	fermitin family homolog 3 (Drosophila)
1456015_x_at	2.08837	down	Ndufv1	NADH dehydrogenase (ubiquinone) flavoprotein 1
1437377_a_at	9.58494	down	Polrmt	polymerase (RNA) mitochondrial (DNA directed)
1437379_x_at	2.96192	down	Trap1	TNF receptor-associated protein 1
1456032_x_at	3.98343	down	EG666634 /// H2afz	predicted gene
1437380_x_at	4.2615	down	Pgd	phosphogluconate dehydrogenase
1437381_x_at	2.92714	down	Gpr172b	G protein-coupled receptor 172B
1456042_s_at	2.06588	down	Cramp1l	Crm
1437413_x_at	22.3859	down	OTTMUSG00000016246 /// Rps29	predicted gene
1438986_x_at	37.1425	down	Rps17	ribosomal protein S17
1437437_x_at	2.41983	down	Dnpep	aspartyl aminopeptidase
1437461_s_at	8.27438	down	Rnpc3	RNA-binding region (RNP1
1437490_x_at	2.04632	down	LOC640502 /// Uap1	similar to UDP-N-acetylhexosamine pyrophosphorylase /// UDP-N-acetylglucosamine pyrophosphorylase 1
1437510_x_at	29.5732	down	Rps17	ribosomal protein S17
1456079_x_at	3.99903	down	Apex1	apurinic/apyrimidinic endonuclease 1
1456083_x_at	22.9353	down	Eif3c	eukaryotic translation initiation factor 3
1456086_x_at	20.3707	down	LOC631302 /// Pqbp1	similar to polyglutamine binding protein 1 /// polyglutamine binding protein 1
1437527_x_at	4.46038	down	Mcl1	myeloid cell leukemia sequence 1
1437545_at	2.49047	down	Rcor1	REST corepressor 1
1437565_a_at	2.58825	down	Gnl2 /// LOC633966	guanine nucleotide binding protein-like 2 (nucleolar) /// similar to guanine nucleotide binding protein-like 2 (nucleolar)
1437610_x_at	10.4665	down	OTTMUSG00000016616 /// OTTMUSG00000022847 /// Rps8	predicted gene
1437611_x_at	2.34354	down	Kif2c	kinesin family member 2C
1437621_x_at	6.90294	down	EG665516 /// EG666036 /// EG668771 /// Phgdh	predicted gene
1437622_x_at	4.72721	down	Mrpl28	mitochondrial ribosomal protein L28
1437628_s_at	10.7661	down	Rhoa	ras homolog gene family
1456125_a_at	4.51362	down	Dynll1 /// EG627788	dynein light chain LC8-type 1 /// predicted gene
1456133_x_at	5.35232	down	Itgb5	integrin beta 5
1437693_at	3.92596	down	D1Pas1	DNA segment
1437696_at	2.18631	down	BC049807	cDNA sequence BC049807
1437706_x_at	3.66181	down	EG545121 /// Rps14	predicted gene
1437709_x_at	2.70707	down	Ttc13	tetratricopeptide repeat domain 13
1437711_x_at	2.17167	down	EG627245 /// EG665017 /// EG666231 /// EG668343 /// Odc1	predicted gene
1437715_x_at	3.85297	down	Apex1	apurinic/apyrimidinic endonuclease 1
1437729_at	5.93213	down	EG665189	PREDICTED: Mus musculus predicted gene
1456170_x_at	2.09351	down	Calr	calreticulin
1437837_x_at	5.24133	down	Poldip3	polymerase (DNA-directed)
1456193_x_at	2.74454	down	Gpx4	glutathione peroxidase 4
1456194_a_at	2.46766	down	Park7	Parkinson disease (autosomal recessive
1456195_x_at	17.2795	down	Itgb5	integrin beta 5
1437874_s_at	52.4683	down	Hexb	hexosaminidase B
1456212_x_at	17.8592	down	Socs3	suppressor of cytokine signaling 3
1456225_x_at	9.33058	down	Trib3	tribbles homolog 3 (Drosophila)
1437952_at	136.64	down	AU040096	expressed sequence AU040096
1437975_a_at	12.5647	down	100041163 /// 100042634 /// EG385336 /// EG664936 /// EG666548 /// ENSMUSG00000063556 /// ENSMUSG00000071532 /// LOC100042058 /// LOC100046821 /// Rpl23a	predicted gene
1437976_x_at	17.8245	down	100041163 /// ENSMUSG00000063556 /// ENSMUSG00000071532 /// LOC100046821 /// Rpl23a	predicted gene
1437984_x_at	4.23854	down	Bat1a	HLA-B-associated transcript 1A
1437991_x_at	6.49046	down	Rusc1	RUN and SH3 domain containing 1
1456243_x_at	4.29393	down	Mcl1	myeloid cell leukemia sequence 1
1456244_x_at	4.36457	down	Glrx3	glutaredoxin 3
1456270_s_at	36.3218	down	Pramel6	preferentially expressed antigen in melanoma like 6
1438090_x_at	4.10901	down	Ankrd54	ankyrin repeat domain 54
1438092_x_at	2.32461	down	H2afz	H2A histone family
1438097_at	8.51609	down	Rab20	RAB20
1456293_s_at	4.25397	down	Ccnh	cyclin H
1438159_x_at	5.47312	down	Ndufv2	NADH dehydrogenase (ubiquinone) flavoprotein 2
1438377_x_at	2.30802	down	Slc13a3	solute carrier family 13 (sodium-dependent dicarboxylate transporter)
1456314_x_at	20.3796	down	Cdk2ap1 /// LOC100047490	CDK2 (cyclin-dependent kinase 2)-associated protein 1 /// similar to putative oral cancer suppressor
1438178_x_at	2.14265	down	Atad3a	ATPase family
1438183_x_at	19.1549	down	Sord	sorbitol dehydrogenase
1438206_a_at	2.7515	down	Sys1	SYS1 Golgi-localized integral membrane protein homolog (S. cerevisiae)
1438211_s_at	2.62333	down	Dbp	D site albumin promoter binding protein
1438220_at	2.32187	down	Foxj3	forkhead box J3
1456340_at	2.03238	down	Mettl11a	Methyltransferase like 11A (Mettl11a)
1456341_a_at	39.7705	down	2310051E17Rik /// Klf9	RIKEN cDNA 2310051E17 gene /// Kruppel-like factor 9
1438312_s_at	3.67309	down	Ltbp3	latent transforming growth factor beta binding protein 3
1438315_x_at	2.56984	down	Akr7a5	aldo-keto reductase family 7
1438322_x_at	3.40398	down	Fdft1	farnesyl diphosphate farnesyl transferase 1
1456365_at	57.6447	down	OTTMUSG00000001634	predicted gene
1438369_x_at	10.4263	down	Tmem85	transmembrane protein 85
1438371_x_at	2.05412	down	Ddx5	DEAD (Asp-Glu-Ala-Asp) box polypeptide 5
1456373_x_at	21.273	down	Rps20	ribosomal protein S20
1456374_x_at	17.1782	down	Eif3c	eukaryotic translation initiation factor 3
1438386_x_at	4.04289	down	Mat2a	methionine adenosyltransferase II
1456381_x_at	4.47069	down	Mcl1	myeloid cell leukemia sequence 1
1456405_at	3.52485	down	Dido1	death inducer-obliterator 1
1456424_s_at	6.80342	down	Pltp	phospholipid transfer protein
1438501_at	2.08394	down	100040123 /// EG383032 /// EG665772 /// Rps17	predicted gene
1438502_x_at	3.32562	down	100040123 /// EG383032 /// EG665772 /// Rps17	predicted gene
1438503_x_at	5.29419	down	Edf1 /// OTTMUSG00000005089	endothelial differentiation-related factor 1 /// predicted gene
1438507_x_at	6.46291	down	Rpl14	ribosomal protein L14
1438510_a_at	12.9375	down	Hars	histidyl-tRNA synthetase
1438547_x_at	10.9636	down	Tor2a	torsin family 2
1438626_x_at	7.22767	down	Rpl14	ribosomal protein L14
1438557_x_at	6.1215	down	Dnpep	aspartyl aminopeptidase
1438560_x_at	4.24579	down	Cct4	chaperonin containing Tcp1
1438563_s_at	9.21576	down	Mrps24	mitochondrial ribosomal protein S24
1438597_x_at	2.07561	down	Morf4l1	mortality factor 4 like 1
1438625_s_at	2.02127	down	Pctk1	PCTAIRE-motif protein kinase 1
1438627_x_at	4.19255	down	Pgd	phosphogluconate dehydrogenase
1438630_x_at	4.36079	down	Mat2a	methionine adenosyltransferase II
1438631_x_at	4.5452	down	Ttc13	tetratricopeptide repeat domain 13
1456471_x_at	4.46255	down	EG385344 /// EG627427 /// EG665516 /// EG666036 /// EG666422 /// EG666875 /// EG668506 /// EG668576 /// EG668771 /// LOC630761 /// LOC630896 /// OTTMUSG00000011498 /// Phgdh	predicted gene
1438646_x_at	3.92693	down	2510039O18Rik	RIKEN cDNA 2510039O18 gene
1438650_x_at	2.34274	down	Gja1	gap junction protein
1438655_a_at	4.05677	down	100043876 /// ENSMUSG00000066116 /// Rpl34	predicted gene
1438656_x_at	13.8182	down	Timm17b	translocase of inner mitochondrial membrane 17b
1438680_at	2.27378	down	Auts2	autism susceptibility candidate 2
1456493_at	13.6992	down	MGC118608	similar to Sp110 nuclear body protein
1456495_s_at	3.74061	down	Osbpl6	oxysterol binding protein-like 6
1438741_at	3.01165	down	BC019943	cDNA sequence BC019943
1456515_s_at	10.8485	down	Tcfl5	transcription factor-like 5 (basic helix-loop-helix)
1456516_x_at	2.08406	down	LOC640502 /// Uap1	similar to UDP-N-acetylhexosamine pyrophosphorylase /// UDP-N-acetylglucosamine pyrophosphorylase 1
1438776_x_at	2.54724	down	100040123 /// EG383032 /// EG665772 /// LOC674335 /// Rps17	predicted gene
1438794_x_at	12.6761	down	EG625298 /// EG628061 /// ENSMUSG00000066362 /// LOC100044992 /// LOC100048340 /// OTTMUSG00000005828 /// OTTMUSG00000022580 /// Rps13	predicted gene
1438843_x_at	4.46277	down	Mtch2	mitochondrial carrier homolog 2 (C. elegans)
1438853_x_at	15.8252	down	Ddx54	DEAD (Asp-Glu-Ala-Asp) box polypeptide 54
1456541_x_at	2.18938	down	Atad3a	ATPase family
1460008_x_at	5.11932	down	EG667682 /// ENSMUSG00000066956 /// Ero1l /// Rpl31	predicted gene
1456542_s_at	3.28101	down	Qrsl1	glutaminyl-tRNA synthase (glutamine-hydrolyzing)-like 1
1438859_x_at	21.1571	down	OTTMUSG00000016246 /// Rps29	predicted gene
1438931_s_at	2.68398	down	LOC100047324 /// Sesn1	similar to Sesn1 protein /// sestrin 1
1456581_x_at	2.49211	down	Gdi2	guanosine diphosphate (GDP) dissociation inhibitor 2
1438952_x_at	2.95915	down	Tarbp2	TAR (HIV) RNA binding protein 2
1456584_x_at	2.4865	down	EG385344 /// EG627427 /// EG665516 /// EG666036 /// EG666422 /// EG666875 /// EG668506 /// EG668576 /// EG668771 /// LOC630761 /// LOC630896 /// OTTMUSG00000011498 /// Phgdh	predicted gene
1460010_a_at	11.0637	down	Ptdss2	phosphatidylserine synthase 2
1438968_x_at	2.40057	down	Spint2	serine protease inhibitor
1438976_x_at	3.30103	down	Mat2a	methionine adenosyltransferase II
1438977_x_at	2.24176	down	LOC100045999 /// Ran	similar to RAN
1456585_x_at	42.4686	down	E130309D02Rik	RIKEN cDNA E130309D02 gene
1438984_x_at	5.02039	down	Psmb4	proteasome (prosome
1438988_x_at	2.68893	down	Hn1	hematological and neurological expressed sequence 1
1438992_x_at	2.63878	down	Atf4	activating transcription factor 4
1438993_a_at	3.44108	down	Atp6v1d	ATPase
1456598_at	3.60741	down	100041032 /// 100041179 /// AU018829 /// EG665802 /// LOC100038995 /// LOC100039010 /// LOC100040112 /// LOC100040125 /// LOC100040885 /// LOC100041253 /// LOC100041641 /// LOC100041712 /// LOC665718	predicted gene
1439012_a_at	2.18873	down	Dck	deoxycytidine kinase
1456600_a_at	7.65456	down	Rnf7	ring finger protein 7
1439017_x_at	5.67349	down	Adipor1	adiponectin receptor 1
1439036_a_at	12.7267	down	Atp1b1	ATPase
1456628_x_at	10.1013	down	Rps24	ribosomal protein S24
1439120_at	4.60769	down	Fam120a	family with sequence similarity 120
1439214_a_at	3.66421	down	Api5	apoptosis inhibitor 5
1439253_x_at	2.33288	down	LOC100046650 /// Prelid1	similar to PRELI domain containing 1 /// PRELI domain containing 1
1439266_a_at	7.13887	down	Polr3k	polymerase (RNA) III (DNA directed) polypeptide K
1456702_x_at	3.56798	down	Mat2a	methionine adenosyltransferase II
1439270_x_at	2.2049	down	LOC100045999 /// LOC640204 /// Ran	similar to RAN
1439332_at	2.7378	down	Ddit4l	DNA-damage-inducible transcript 4-like
1456724_x_at	3.68033	down	Wdr79	WD repeat domain 79
1439374_x_at	8.33933	down	Rps10	ribosomal protein S10
1439381_x_at	2.61439	down	Marveld1	MARVEL (membrane-associating) domain containing 1
1456727_a_at	3.46908	down	Csnk1d	casein kinase 1
1439393_x_at	2.836	down	Ppp2r4	protein phosphatase 2A
1439399_a_at	3.00759	down	Snhg1	small nucleolar RNA host gene (non-protein coding) 1
1439410_x_at	2.0727	down	Slc25a39	solute carrier family 25
1439421_x_at	56.614	down	Cbx3 /// LOC633016	chromobox homolog 3 (Drosophila HP1 gamma) /// similar to chromobox homolog 3
1439439_x_at	2.26828	down	Eef1d	eukaryotic translation elongation factor 1 delta (guanine nucleotide exchange protein)
1439443_x_at	4.53975	down	Tkt	transketolase
1439451_x_at	2.86085	down	Gpr172b	G protein-coupled receptor 172B
1439452_x_at	2.84566	down	Dnpep	aspartyl aminopeptidase
1439460_a_at	20.8221	down	Arfgap2	ADP-ribosylation factor GTPase activating protein 2
1439463_x_at	2.92143	down	100042515 /// EG545555 /// EG546331 /// EG665056 /// ENSMUSG00000060128 /// Hmg1l1 /// Hmgb1 /// LOC100045972 /// LOC100046019 /// LOC637733 /// OTTMUSG00000020977	predicted gene
1439466_s_at	7.84227	down	Bud31	BUD31 homolog (yeast)
1439771_s_at	62.1981	down	D13Ertd608e	DNA segment
1439809_at	3.21318	down	Pramel7	preferentially expressed antigen in melanoma like 7
1439810_s_at	85.8394	down	Pramel7	preferentially expressed antigen in melanoma like 7
1439973_at	3.29811	down	Crxos1	Crx opposite strand transcript 1
1440255_at	11.7168	down	LOC100045760 /// Mizf	similar to MBD2-interacting zinc finger /// MBD2-interacting zinc finger
1440831_at	19.7877	down	Bach1	BTB and CNC homology 1
1441986_at	2.70317	down	Zcchc6	zinc finger
1442028_at	5.66421	down	B4galnt2	beta-1
1442145_at	2.56017	down	Atp13a3	ATPase type 13A3
1447377_at	2.04425	down	Gm428	gene model 428
1447924_at	3.51047	down	Nucks1	nuclear casein kinase and cyclin-dependent kinase substrate 1
1459880_at	2.71412	down	Agxt2l2	Alanine-glyoxylate aminotransferase 2-like 2
1447963_at	6.8581	down
1448026_at	2.09474	down	Chd7	chromodomain helicase DNA binding protein 7
1448029_at	5.34827	down	Tbx3	T-box 3
1459923_at	17.2304	down	Bex6	brain expressed gene 6
1419805_s_at	2.66184	down	EG434616 /// Ggps1 /// LOC100045315	predicted gene
1449639_at	2.03713	down
1449648_s_at	31.7345	down	Polr1c	polymerase (RNA) I polypeptide C
1419879_s_at	16.6678	down	Trim25	tripartite motif-containing 25
1419884_at	3.67932	down
1419964_s_at	10.1109	down	Hdgf	hepatoma-derived growth factor
1449681_at	3.76737	down	Hdgf	Hepatoma-derived growth factor
1420023_at	2.89633	down	Etf1	eukaryotic translation termination factor 1
1420024_s_at	5.71859	down	Etf1	eukaryotic translation termination factor 1
1449701_at	3.09214	down	Etf1	Eukaryotic translation termination factor 1 (Etf1)
1449706_s_at	4.00002	down	Nr5a2	nuclear receptor subfamily 5
1449714_at	2.17367	down	Fam73b	family with sequence similarity 73
1449718_s_at	2.20289	down	4930453N24Rik	RIKEN cDNA 4930453N24 gene
1420064_s_at	11.2664	down	Tktl1	transketolase-like 1
1420085_at	3.54908	down	Fgf4	fibroblast growth factor 4
1420086_x_at	2.96878	down	Fgf4	fibroblast growth factor 4
1449730_s_at	2.44133	down	Fzd3	frizzled homolog 3 (Drosophila)
1420142_s_at	3.46658	down	Pa2g4	proliferation-associated 2G4
1420158_s_at	2.93934	down	Abcf1	ATP-binding cassette
1420191_s_at	16.2111	down	Tmem191c	transmembrane protein 191C
1449770_x_at	23.4879	down	Tmem191c	transmembrane protein 191C
1420192_at	2.54979	down	Tmem191c	transmembrane protein 191C
1449773_s_at	12.7799	down	Gadd45b	growth arrest and DNA-damage-inducible 45 beta
AFFX-18SRNAMur/X00686_5_at	3.04807	up
AFFX-18SRNAMur/X00686_M_at	11.3916	up
AFFX-MURINE_b1_at	2.86483	up
1415672_at	4.49566	up	Golga7	golgi autoantigen
1460643_at	2.76005	up	Ell	elongation factor RNA polymerase II
1415677_at	3.10029	up	Dhrs1	dehydrogenase/reductase (SDR family) member 1
1460645_at	3.73186	up	Chordc1	cysteine and histidine-rich domain (CHORD)-containing
1415745_a_at	3.14368	up	Dscr3	Down syndrome critical region gene 3
1415679_at	8.61364	up	OTTMUSG00000006606 /// Psenen	predicted gene
1415682_at	4.10101	up	Xpo7	exportin 7
1415684_at	2.04285	up	Atg5	autophagy-related 5 (yeast)
1460654_at	2.19116	up	Slc30a3	solute carrier family 30 (zinc transporter)
1415686_at	2.54641	up	Rab14	RAB14
1460656_a_at	5.01339	up	LOC100044184 /// Sft2d1	hypothetical protein LOC100044184 /// SFT2 domain containing 1
1415724_a_at	7.39732	up	Cdc42	cell division cycle 42 homolog (S. cerevisiae)
1460708_s_at	4.04658	up	Cdc42	cell division cycle 42 homolog (S. cerevisiae)
1460665_a_at	6.00835	up	Cnot7	CCR4-NOT transcription complex
1415749_a_at	2.45583	up	Rragc	Ras-related GTP binding C
1415688_at	2.11537	up	Ube2g1	ubiquitin-conjugating enzyme E2G 1 (UBC7 homolog
1460726_at	2.02792	up	Adss	adenylosuccinate synthetase
1415747_s_at	2.0191	up	Riok3	RIO kinase 3 (yeast)
1415691_at	2.54598	up	Dlg1 /// LOC100047603	discs
1415695_at	4.78549	up	Psma1	proteasome (prosome
1460730_at	5.04937	up	Eif2b1	eukaryotic translation initiation factor 2B
1415751_at	2.46897	up	Hp1bp3	heterochromatin protein 1
1415698_at	5.71346	up	Golm1	golgi membrane protein 1
1415722_a_at	9.48581	up	Vta1	Vps20-associated 1 homolog (S. cerevisiae)
1460677_at	2.86323	up	Spats2	spermatogenesis associated
1415700_a_at	5.13685	up	Ssr3	signal sequence receptor
1460678_at	4.35784	up	Klhdc2	kelch domain containing 2
1415706_at	4.4976	up	Copa	coatomer protein complex subunit alpha
1415708_at	3.62928	up	Tug1	taurine upregulated gene 1
1415714_a_at	6.37092	up	Snrnp27	small nuclear ribonucleoprotein 27 (U4/U6.U5)
1460697_s_at	7.26984	up	Snrnp27	small nuclear ribonucleoprotein 27 (U4/U6.U5)
1460698_a_at	5.34062	up	Sec11c	SEC11 homolog C (S. cerevisiae)
1460702_at	2.71461	up	Triap1	TP53 regulated inhibitor of apoptosis 1
1460707_at	2.03668	up	Ptp4a2	protein tyrosine phosphatase 4a2
1415726_at	4.22923	up	Ankrd17	ankyrin repeat domain 17
1415731_at	2.55323	up	Angel2	angel homolog 2 (Drosophila)
1460709_a_at	7.37183	up	Bat5	HLA-B associated transcript 5
1415732_at	2.25766	up	Bat5	HLA-B associated transcript 5
1415767_at	2.79863	up	Ythdf1	YTH domain family 1
1415775_at	2.96294	up	Rbbp7	retinoblastoma binding protein 7
1415779_s_at	2.71882	up	Actg1	actin
1415783_at	3.36736	up	Vps35	vacuolar protein sorting 35
1415785_a_at	4.01927	up	Cct8	chaperonin containing Tcp1
1415788_at	2.01342	up	Ublcp1	ubiquitin-like domain containing CTD phosphatase 1
1415791_at	16.2367	up	Rnf34	ring finger protein 34
1415794_a_at	2.62699	up	LOC100046080 /// Spin1	similar to Spindlin 1 /// spindlin 1
1415795_at	3.07705	up	LOC100046080 /// Spin1	similar to Spindlin 1 /// spindlin 1
1415796_at	3.51867	up	Dazap2	DAZ associated protein 2
1415806_at	27.8733	up	Plat	plasminogen activator
1427504_s_at	2.4022	up	Sfrs2	splicing factor
1415810_at	8.97388	up	Uhrf1	ubiquitin-like
1415813_at	3.81592	up	Api5	apoptosis inhibitor 5
1415814_at	3.16894	up	Atp6v1b2	ATPase
1448101_s_at	2.58601	up	Trim27	tripartite motif-containing 27
1448103_s_at	2.4367	up	Nono	non-POU-domain-containing
1415820_x_at	3.31817	up	Nono	non-POU-domain-containing
1415821_at	4.53909	up	Nptn	neuroplastin
1448104_at	3.10709	up	Aldh6a1	aldehyde dehydrogenase family 6
1415826_at	6.51912	up	Atp6v1h	ATPase
1415830_at	9.55776	up	Orc5l	origin recognition complex
1415831_at	3.9865	up	Psmd2	proteasome (prosome
1415838_at	5.35183	up	Serinc1	serine incorporator 1
1415839_a_at	3.24415	up	Npm1	nucleophosmin 1
1415840_at	35.0015	up	Elovl5	ELOVL family member 5
1415841_at	3.88715	up	Dync1i2	dynein cytoplasmic 1 intermediate chain 2
1451747_a_at	4.13382	up	Atg12	autophagy-related 12 (yeast)
1448116_at	3.2158	up	Uba1	ubiquitin-like modifier activating enzyme 1
1415856_at	2.94446	up	Emb	embigin
1425364_a_at	2.28107	up	Slc3a2	solute carrier family 3 (activators of dibasic and neutral amino acid transport)
1415864_at	39.9522	up	Bpgm	2
1415865_s_at	9.59105	up	Bpgm	2
1448119_at	4.37803	up	Bpgm	2
1448120_at	11.3288	up	Gdf9	growth differentiation factor 9
1415870_at	4.38868	up	Calu	calumenin
1415872_at	2.3566	up	Hnrnph1	heterogeneous nuclear ribonucleoprotein H1
1415877_at	2.01189	up	Dpysl3	dihydropyrimidinase-like 3
1415880_a_at	2.1439	up	Lamp1	lysosomal-associated membrane protein 1
1415881_at	12.6804	up	Ghitm	growth hormone inducible transmembrane protein
1448133_at	3.20433	up	Nmd3	NMD3 homolog (S. cerevisiae)
1415890_at	4.17595	up	Papss1	3'-phosphoadenosine 5'-phosphosulfate synthase 1
1426100_a_at	4.14767	up	Tk2	thymidine kinase 2
1415891_at	2.43554	up	Suclg1	succinate-CoA ligase
1452514_a_at	2.82388	up	Kit	kit oncogene
1460167_at	2.71597	up	Aldh7a1	aldehyde dehydrogenase family 7
1415904_at	6.42014	up	Lpl	lipoprotein lipase
1415908_at	16.5107	up	Tspyl1	testis-specific protein
1415910_s_at	2.22684	up	Ciapin1	cytokine induced apoptosis inhibitor 1
1448143_at	2.96478	up	Aldh2	aldehyde dehydrogenase 2
1415916_a_at	3.3977	up	Mthfd1	methylenetetrahydrofolate dehydrogenase (NADP+ dependent)
1415917_at	3.46878	up	Mthfd1	methylenetetrahydrofolate dehydrogenase (NADP+ dependent)
1448148_at	2.53467	up	Grn	granulin
1448149_at	2.43793	up	Ctnna1	catenin (cadherin associated protein)
1460168_at	7.18452	up	Slbp	stem-loop binding protein
1415934_at	5.27542	up	Cops8	COP9 (constitutive photomorphogenic) homolog
1415935_at	5.27369	up	Smoc2	SPARC related modular calcium binding 2
1415936_at	2.5558	up	Bcar3	breast cancer anti-estrogen resistance 3
1415943_at	2.6922	up	Sdc1	syndecan 1
1415949_at	2.19111	up	Cpe /// LOC100046434	carboxypeptidase E /// similar to carboxypeptidase E
1415963_at	2.62303	up	Hnrnph2	heterogeneous nuclear ribonucleoprotein H2
1415970_at	2.63746	up	Cox6c	cytochrome c oxidase
1415975_at	2.84212	up	Carhsp1	calcium regulated heat stable protein 1
1415978_at	3.11449	up	Tubb3	tubulin
1415981_at	2.58033	up	Herpud2	HERPUD family member 2
1415985_at	2.2282	up	Sf3b3	splicing factor 3b
1448165_at	3.85253	up	Casp2	caspase 2
1415996_at	20.8145	up	Txnip	thioredoxin interacting protein
1415999_at	2.54466	up	Hey1	hairy/enhancer-of-split related with YRPW motif 1
1416000_a_at	10.6707	up	Prdx1	peroxiredoxin 1
1448172_at	8.75819	up	Mdh1	malate dehydrogenase 1
1416008_at	4.40354	up	Satb1	special AT-rich sequence binding protein 1
1448174_at	2.61085	up	Cul1	cullin 1
1416009_at	2.88446	up	Tspan3	tetraspanin 3
1448176_a_at	2.29755	up	Hnrnpk	heterogeneous nuclear ribonucleoprotein K
1416021_a_at	8.64984	up	EG620603 /// Fabp5	predicted gene
1416022_at	4.25294	up	Fabp5	fatty acid binding protein 5
1460171_at	2.45102	up	Cops5	COP9 (constitutive photomorphogenic) homolog
1416027_at	6.90675	up	Pdcd6	programmed cell death 6
1416029_at	2.17736	up	Klf10	Kruppel-like factor 10
1416032_at	2.18324	up	Tmem109	transmembrane protein 109
1427418_a_at	21.9305	up	Hif1a	hypoxia inducible factor 1
1416035_at	18.1116	up	Hif1a	hypoxia inducible factor 1
1448191_at	2.67733	up	Plk1	polo-like kinase 1 (Drosophila)
1448196_at	4.52878	up	Mat2b	methionine adenosyltransferase II
1416060_at	11.9279	up	Tbc1d15	TBC1 domain family
1416061_at	5.83067	up	Tbc1d15	TBC1 domain family
1416062_at	2.27216	up	Tbc1d15	TBC1 domain family
1416067_at	3.17907	up	Ifrd1	interferon-related developmental regulator 1
1416073_a_at	6.10833	up	Nup85	nucleoporin 85
[truncated: 2,318 more rows]

## Sheet: mouse 2v4
The regulated genes from 2-cell to 4-cell stage of mouse
Probe Set ID	Fold change([2] vs [4])	Regulation([2] vs [4])	Gene Symbol	Gene Title
1460716_a_at	2.37007	down	Cbfb	core binding factor beta
1415740_at	2.72939	down	Psmc5	protease (prosome
1460645_at	2.04657	down	Chordc1	cysteine and histidine-rich domain (CHORD)-containing
1415720_s_at	2.20846	down	Mad2l1bp	MAD2L1 binding protein
1460669_at	2.4311	down	Ilf3	interleukin enhancer binding factor 3
1460680_a_at	2.60259	down	LOC100044627 /// Rpl23	similar to HL23 ribosomal protein /// ribosomal protein L23
1415701_x_at	2.47453	down	Rpl23	ribosomal protein L23
1415695_at	2.791	down	Psma1	proteasome (prosome
1415696_at	2.94778	down	Sar1a	SAR1 gene homolog A (S. cerevisiae)
1460683_at	3.03419	down	Tead4	TEA domain family member 4
1460736_at	2.15477	down	A230054D04Rik	RIKEN cDNA A230054D04 gene
1460698_a_at	2.11841	down	Sec11c	SEC11 homolog C (S. cerevisiae)
1415764_at	2.00292	down	Zc3h11a	zinc finger CCCH type containing 11A
1415733_a_at	2.10194	down	Tomm5	translocase of outer mitochondrial membrane 5 homolog (yeast)
1415771_at	2.05189	down	Ncl	nucleolin
1415772_at	5.44639	down	Ncl	nucleolin
1415779_s_at	2.1116	down	Actg1	actin
1415782_at	2.07408	down	ENSMUSG00000068529 /// LOC100044181 /// LOC100045245 /// LOC100046167 /// OTTMUSG00000012141 /// OTTMUSG00000013375 /// Sumo2	predicted gene
1415783_at	2.12925	down	Vps35	vacuolar protein sorting 35
1415785_a_at	2.8184	down	Cct8	chaperonin containing Tcp1
1415800_at	13.7803	down	Gja1	gap junction protein
1415802_at	2.74864	down	Slc16a1	solute carrier family 16 (monocarboxylic acid transporters)
1427504_s_at	4.52736	down	Sfrs2	splicing factor
1415817_s_at	2.84598	down	Cct7	chaperonin containing Tcp1
1448102_a_at	5.52008	down	Wdr61	WD repeat domain 61
1459985_at	2.54205	down	Wdr61	WD repeat domain 61
1415820_x_at	2.25586	down	Nono	non-POU-domain-containing
1448106_at	2.08825	down	Necap1	NECAP endocytosis associated 1
1451310_a_at	2.00855	down	Ctsl	cathepsin L
1415839_a_at	3.04324	down	Npm1	nucleophosmin 1
1448109_a_at	2.56143	down	Rpl26	ribosomal protein L26
1415852_at	3.12261	down	Impdh2	inosine 5'-phosphate dehydrogenase 2
1415858_at	2.30201	down	Eif3c	eukaryotic translation initiation factor 3
1415867_at	4.0297	down	Cct4	chaperonin containing Tcp1
1415870_at	2.20117	down	Calu	calumenin
1415872_at	4.38783	down	Hnrnph1	heterogeneous nuclear ribonucleoprotein H1
1415878_at	2.3255	down	Rrm1	ribonucleotide reductase M1
1415879_a_at	2.59005	down	Rplp2	ribosomal protein
1448128_at	2.90668	down	Ctsa	cathepsin A
1415881_at	2.49738	down	Ghitm	growth hormone inducible transmembrane protein
1459986_a_at	2.14407	down	100040123 /// Rps17	predicted gene
1455662_x_at	2.94526	down	Rps17	ribosomal protein S17
1415909_at	3.05165	down	Stip1	stress-induced phosphoprotein 1
1415911_at	3.17801	down	Impact	imprinted and ancient
1448144_at	2.27939	down	Hnrnpab	heterogeneous nuclear ribonucleoprotein A/B
1415915_at	3.22391	down	Ddx1	DEAD (Asp-Glu-Ala-Asp) box polypeptide 1
1415916_a_at	2.01753	down	Mthfd1	methylenetetrahydrofolate dehydrogenase (NADP+ dependent)
1436760_a_at	2.19046	down	EG629732 /// LOC100042180 /// LOC100048094 /// OTTMUSG00000000623 /// OTTMUSG00000016616 /// OTTMUSG00000022847 /// Rps8	predicted gene
1448148_at	3.33719	down	Grn	granulin
1415922_s_at	2.04516	down	Marcksl1	MARCKS-like 1
1415928_a_at	2.2338	down	Map1lc3b	microtubule-associated protein 1 light chain 3 beta
1415929_at	3.54256	down	Map1lc3b	microtubule-associated protein 1 light chain 3 beta
1415942_at	3.69816	down	100041509 /// EG234703 /// EG665071 /// ENSMUSG00000058443 /// LOC100048223 /// LOC100048462 /// OTTMUSG00000015005 /// Rpl10	predicted gene
1448157_s_at	2.15891	down	100041509 /// ENSMUSG00000058443 /// LOC100048223 /// LOC100048462 /// OTTMUSG00000015005 /// Rpl10	predicted gene
1415963_at	6.29047	down	Hnrnph2	heterogeneous nuclear ribonucleoprotein H2
1415977_at	3.55864	down	Isyna1	myo-inositol 1-phosphate synthase A1
1426162_a_at	5.64963	down	Rpl7	ribosomal protein L7
1426163_x_at	2.483	down	Rpl7	ribosomal protein L7
1415979_x_at	3.40652	down	Rpl7	ribosomal protein L7
1415984_at	3.01849	down	Acadm	acyl-Coenzyme A dehydrogenase
1415990_at	2.79648	down	Vdac2	voltage-dependent anion channel 2
1415995_at	2.65633	down	Casp6	caspase 6
1416005_at	3.03794	down	Psmc1	protease (prosome
1416014_at	2.42046	down	Abce1	ATP-binding cassette
1416015_s_at	4.38617	down	Abce1	ATP-binding cassette
1448176_a_at	2.02666	down	Hnrnpk	heterogeneous nuclear ribonucleoprotein K
1416018_at	5.13492	down	Dr1	down-regulator of transcription 1
1460171_at	3.58825	down	Cops5	COP9 (constitutive photomorphogenic) homolog
1416027_at	2.83993	down	Pdcd6	programmed cell death 6
1416029_at	2.84901	down	Klf10	Kruppel-like factor 10
1448182_a_at	2.34471	down	Cd24a /// EG621324	CD24a antigen /// predicted gene
1416037_a_at	2.8246	down	Cct2	chaperonin containing Tcp1
1416039_x_at	2.04086	down	Cyr61	cysteine rich protein 61
1416041_at	7.31739	down	Sgk1	serum/glucocorticoid regulated kinase 1
1416042_s_at	2.47103	down	Nasp	nuclear autoantigenic sperm protein (histone-binding)
1416049_at	2.05718	down	Gldc	glycine decarboxylase
1416052_at	2.23554	down	Prps1	phosphoribosyl pyrophosphate synthetase 1
1416054_at	3.02092	down	Rps5	ribosomal protein S5
1448205_at	2.74524	down	Ccnb1	cyclin B1
1449675_at	2.43053	down	231869 /// Ccnb1 /// EG434175 /// EG667005 /// LOC635091	predicted gene
1448210_at	2.26252	down	Rab1	RAB1
1416083_at	2.80409	down	LOC100047896 /// Zfand5	similar to zinc finger protein ZNF216 /// zinc finger
1448212_at	3.12102	down	Psmg2	proteasome (prosome
1416095_x_at	2.10369	down	1110005A23Rik /// EG625193	RIKEN cDNA 1110005A23 gene /// predicted gene
1448217_a_at	3.678	down	EG621100 /// EG622236 /// OTTMUSG00000001643 /// Rpl27	predicted gene
1416099_at	2.66818	down	EG621100 /// OTTMUSG00000001643 /// Rpl27	predicted gene
1416100_at	4.15634	down	Eif3d	eukaryotic translation initiation factor 3
1448221_at	3.72645	down	Bat1a	HLA-B-associated transcript 1A
1448224_at	2.95295	down	Tfam	transcription factor A
1416119_at	2.04896	down	Txn1	thioredoxin 1
1448226_at	2.83045	down	Rrm2	ribonucleotide reductase M2
1416135_at	3.684	down	Apex1	apurinic/apyrimidinic endonuclease 1
1416141_a_at	2.14626	down	OTTMUSG00000013244 /// Rps6	predicted gene
1434377_x_at	2.12008	down	OTTMUSG00000013244 /// Rps6	predicted gene
1416142_at	3.39115	down	Rps6	ribosomal protein S6
1416144_a_at	3.3236	down	Dhx15	DEAH (Asp-Glu-Ala-His) box polypeptide 15
1416145_at	3.17269	down	Dhx15	DEAH (Asp-Glu-Ala-His) box polypeptide 15
1416146_at	2.80822	down	Hspa4	heat shock protein 4
1416150_a_at	7.99143	down	Sfrs3	splicing factor
1416151_at	3.54141	down	Sfrs3	splicing factor
1416152_a_at	5.8981	down	Sfrs3	splicing factor
1448234_at	2.93935	down	Dnajb6	DnaJ (Hsp40) homolog
1416176_at	3.53425	down	Hmgb1 /// OTTMUSG00000020977	high mobility group box 1 /// predicted gene
1416177_at	3.05239	down	Rbmxrt	RNA binding motif protein
1448244_at	2.11168	down	Lypla1	lysophospholipase 1
1416202_at	2.30276	down	Phb2	prohibitin 2
1416208_at	3.1903	down	Usp14	ubiquitin specific peptidase 14
1448252_a_at	2.86452	down	Eef1b2	eukaryotic translation elongation factor 1 beta 2
1416214_at	2.23857	down	Mcm4	minichromosome maintenance deficient 4 homolog (S. cerevisiae)
1416217_a_at	2.27666	down	100042986 /// OTTMUSG00000015874 /// Rpl37a	predicted gene
1416219_at	2.30691	down	Rpl19	ribosomal protein L19
1416240_at	2.06911	down	Psmb7	proteasome (prosome
1416243_a_at	2.34277	down	100038991 /// 100043296 /// ENSMUSG00000069439 /// Rpl35	predicted gene
1416244_a_at	2.39754	down	Cnbp	cellular nucleic acid binding protein
1448270_at	3.81468	down	Ddx21	DEAD (Asp-Glu-Ala-Asp) box polypeptide 21
1448274_at	2.39039	down	C1qbp	complement component 1
1416258_at	2.16394	down	Tk1	thymidine kinase 1
1416259_at	3.02049	down	Pex12	peroxisomal biogenesis factor 12
1416260_a_at	2.36315	down	Snx1	sorting nexin 1
1448276_at	2.3417	down	Tspan4	tetraspanin 4
1430500_s_at	3.26574	down	Mtx2	metaxin 2
1416276_a_at	3.14693	down	Rps4x	ribosomal protein S4
1416282_at	2.34024	down	Psmc3	proteasome (prosome
1416283_at	2.34887	down	Gart	phosphoribosylglycinamide formyltransferase
1460179_at	3.58324	down	Dnaja1	DnaJ (Hsp40) homolog
1416288_at	4.58666	down	Dnaja1	DnaJ (Hsp40) homolog
1416290_a_at	3.89523	down	Psmc4	proteasome (prosome
1416291_at	2.83091	down	Psmc4	proteasome (prosome
1416292_at	2.24754	down	Prdx3	peroxiredoxin 3
1416308_at	2.11844	down	Ugdh	UDP-glucose dehydrogenase
1448299_at	2.0092	down	Slc1a1	solute carrier family 1 (neuronal/epithelial high affinity glutamate transporter
1416327_at	2.7833	down	Ufc1	ubiquitin-fold modifier conjugating enzyme 1
1416343_a_at	3.80178	down	Lamp2	lysosomal-associated membrane protein 2
1416344_at	2.16761	down	Lamp2	lysosomal-associated membrane protein 2
1416345_at	3.06517	down	ENSMUSG00000045455 /// Timm8a1	predicted gene
1431284_a_at	2.12496	down	Spns1	spinster homolog 1 (Drosophila)
1433507_a_at	2.84659	down	ENSMUSG00000066826 /// ENSMUSG00000069996 /// Hmgn2 /// LOC100044482	predicted gene
1416364_at	4.16368	down	Hsp90ab1	heat shock protein 90 alpha (cytosolic)
1416369_at	2.84666	down	Hiatl1	hippocampus abundant transcript-like 1
1416382_at	2.58882	down	Ctsc	cathepsin C
1448317_at	2.40392	down	Tmem128	transmembrane protein 128
1416394_at	2.1156	down	Bag1	BCL2-associated athanogene 1
1416395_at	2.04092	down	Guk1	guanylate kinase 1
1416404_s_at	2.26389	down	LOC100039355 /// Rps16	similar to Rps16 protein /// ribosomal protein S16
1416410_at	2.27744	down	Pafah1b3	platelet-activating factor acetylhydrolase
1416417_a_at	2.16945	down	Ndufb7	NADH dehydrogenase (ubiquinone) 1 beta subcomplex
1416420_a_at	3.05173	down	EG637379 /// ENSMUSG00000047965 /// ENSMUSG00000062456 /// ENSMUSG00000071269 /// Rpl9	predicted gene
1416426_at	5.59928	down	Rab5a	RAB5A
1416432_at	2.13516	down	Pfkfb3	6-phosphofructo-2-kinase/fructose-2
1448336_at	2.08784	down	Drg1	developmentally regulated GTP binding protein 1
1416440_at	2.12481	down	Cd164	CD164 antigen
1416443_a_at	2.35284	down	Sae1	SUMO1 activating enzyme subunit 1
1416445_at	2.72477	down	Fam98a	family with sequence similarity 98
1416446_at	2.36092	down	Tmem30a	transmembrane protein 30A
1448339_at	3.60394	down	Tmem30a	transmembrane protein 30A
1416453_x_at	2.21344	down	EG432865 /// EG665281 /// EG668406 /// ENSMUSG00000059333 /// LOC100038978 /// LOC100039828 /// LOC676277 /// OTTMUSG00000006191 /// OTTMUSG00000018594 /// OTTMUSG00000027340 /// Rps12	predicted gene
1424681_a_at	2.50871	down	Psma5	proteasome (prosome
1448347_a_at	2.19408	down	Caprin1	cell cycle associated protein 1
1416461_at	3.02708	down	Caprin1	cell cycle associated protein 1
1416486_at	2.95395	down	Scye1	small inducible cytokine subfamily E
1416489_at	3.11134	down	Pi4k2b	phosphatidylinositol 4-kinase type 2 beta
1448365_at	2.36287	down	Exosc7	exosome component 7
1416495_s_at	2.43479	down	BC002163 /// Ndufs5	cDNA sequence BC002163 /// NADH dehydrogenase (ubiquinone) Fe-S protein 5
1416499_a_at	3.75091	down	Dctn6	dynactin 6
1416506_at	4.28273	down	Psma6	proteasome (prosome
1416509_at	2.27852	down	Tm9sf3	transmembrane 9 superfamily member 3
1416514_a_at	2.21334	down	Fscn1	fascin homolog 1
1416519_at	2.29135	down	LOC100048508 /// OTTMUSG00000012957 /// Rpl36	similar to Rpl36 protein /// predicted gene
1416520_x_at	2.11493	down	100043718 /// LOC100048508 /// OTTMUSG00000012957 /// Rpl36	predicted gene
1416546_a_at	2.43194	down	Rpl6	ribosomal protein L6
1416569_at	2.01581	down	Actl6a	actin-like 6A
1448388_a_at	3.8032	down	1110002B05Rik	RIKEN cDNA 1110002B05 gene
1416586_at	2.11453	down	Zfp239	zinc finger protein 239
1448393_at	2.87362	down	Cldn7	claudin 7
1416595_at	2.29709	down	Mrps22	mitochondrial ribosomal protein S22
1448399_at	2.16808	down	Tax1bp1	Tax1 (human T-cell leukemia virus type I) binding protein 1
1416604_at	2.0587	down	Cyc1	cytochrome c-1
1448403_at	2.75392	down	Lars	leucyl-tRNA synthetase
1416631_at	2.05962	down	Ap4b1	adaptor-related protein complex AP-4
1416633_a_at	2.40743	down	Fam96a	family with sequence similarity 96
1416634_at	2.13508	down	Fam96a	family with sequence similarity 96
1416635_at	2.79518	down	Smpdl3a	sphingomyelin phosphodiesterase
1448419_at	2.31357	down	Pop4	processing of precursor 4
1416659_at	6.81452	down	Eif3a	eukaryotic translation initiation factor 3
1416663_at	2.22561	down	Ndufa9	NADH dehydrogenase (ubiquinone) 1 alpha subcomplex
1416664_at	2.26769	down	Cdc20	cell division cycle 20 homolog (S. cerevisiae)
1416665_at	2.62121	down	Coq7	demethyl-Q 7
1416667_at	2.19309	down	Ebp	phenylalkylamine Ca2+ antagonist (emopamil) binding protein
1416668_at	4.14421	down	Ttc35	tetratricopeptide repeat domain 35
1448430_a_at	4.16723	down	Naca	nascent polypeptide-associated complex alpha polypeptide
1416669_s_at	3.61978	down	Naca	nascent polypeptide-associated complex alpha polypeptide
1416684_at	2.09883	down	Fbl /// LOC100044829	fibrillarin /// similar to Fibrillarin
1448434_at	2.3275	down	Rnf103	ring finger protein 103
1428011_a_at	2.054	down	Erbb2ip	Erbb2 interacting protein
1416719_a_at	3.08932	down	Rps10	ribosomal protein S10
1438723_a_at	3.56196	down	Rps10	ribosomal protein S10
1456497_x_at	3.09533	down	Rps10	ribosomal protein S10
1448454_at	2.40034	down	Sfrs6	splicing factor
1416743_at	3.80665	down	LOC640502 /// Uap1	similar to UDP-N-acetylhexosamine pyrophosphorylase /// UDP-N-acetylglucosamine pyrophosphorylase 1
1416773_at	2.07405	down	Wee1	WEE 1 homolog (S. pombe)
1416789_at	3.26614	down	Idh3g	isocitrate dehydrogenase 3 (NAD+)
1448461_a_at	2.46273	down	LOC100044980 /// Thoc7	similar to Thoc7 protein /// THO complex 7 homolog (Drosophila)
1416799_at	2.23686	down	Trpm7	transient receptor potential cation channel
1448478_at	2.57276	down	Med20	mediator complex subunit 20
1448492_a_at	2.46989	down	Psmd12	proteasome (prosome
1448493_at	2.41375	down	Paip2	polyadenylate-binding protein-interacting protein 2
1454116_a_at	3.59259	down	Mterfd1	MTERF domain containing 1
1448503_at	2.92459	down	Mcl1	myeloid cell leukemia sequence 1
1416880_at	2.04975	down	Mcl1	myeloid cell leukemia sequence 1
1448505_at	2.88212	down	C1d	nuclear DNA binding protein
1416890_at	2.19135	down	Wdr74	WD repeat domain 74
1416901_at	2.30559	down	Npc2	Niemann Pick type C2
1416907_at	2.479	down	Tsn	translin
1416908_s_at	3.83752	down	Tsn	translin
1448516_at	2.29745	down	Tsn	translin
1416910_at	2.5306	down	Dnajc15	DnaJ (Hsp40) homolog
1416911_a_at	3.11868	down	Akirin1	akirin 1
1416912_at	2.22375	down	Akirin1	akirin 1
1448517_at	2.39416	down	Timm22	translocase of inner mitochondrial membrane 22 homolog (yeast)
1416915_at	3.73014	down	Msh6	mutS homolog 6 (E. coli)
1448524_s_at	2.02373	down	Ssr4	signal sequence receptor
1448525_a_at	2.05041	down	Bnip3l	BCL2/adenovirus E1B interacting protein 3-like
1448527_at	2.26385	down	Pdcd10	programmed cell death 10
1448528_at	2.9263	down	Pdcd10	programmed cell death 10
1416928_at	3.1002	down	Rbm12	RNA binding motif protein 12
1451521_x_at	2.1314	down	Eif4h	eukaryotic translation initiation factor 4H
1416951_a_at	2.07236	down	Atp6v1d	ATPase
1416958_at	9.70079	down	Nr1d2	nuclear receptor subfamily 1
1416975_at	2.05129	down	Stam2	signal transducing adaptor molecule (SH3 domain and ITAM motif) 2
1448542_at	2.16853	down	Bccip	BRCA2 and CDKN1A interacting protein
1417019_a_at	5.64827	down	Cdc6	cell division cycle 6 homolog (S. cerevisiae)
1448555_at	2.53769	down	Rpap3	RNA polymerase II associated protein 3
1460198_a_at	2.54111	down	Psmb3	proteasome (prosome
1417058_a_at	2.17975	down	Krtcap2	keratinocyte associated protein 2
1417073_a_at	2.15866	down	Qk	quaking
1417075_at	2.56274	down	2010309E21Rik	RIKEN cDNA 2010309E21 gene
1417077_at	2.40114	down	Bcap29	B-cell receptor-associated protein 29
1448585_at	2.46706	down	Gtf2h4	general transcription factor II H
1417099_at	2.01575	down	Ftsj1 /// LOC100044636	FtsJ homolog 1 (E. coli) /// similar to Ftsj homolog
1417102_a_at	2.77417	down	LOC100046199 /// Ndufb5	similar to NADH dehydrogenase (ubiquinone) 1 beta subcomplex
1448595_a_at	3.70929	down	Bex1	brain expressed gene 1
1417116_at	2.71386	down	Slc6a8	solute carrier family 6 (neurotransmitter transporter
1448596_at	3.72943	down	Slc6a8	solute carrier family 6 (neurotransmitter transporter
1417124_at	2.50948	down	Dstn	destrin
1417132_at	2.30097	down	Cdc25a	cell division cycle 25 homolog A (S. pombe)
1417157_at	3.83881	down	Actr10	ARP10 actin-related protein 10 homolog (S. cerevisiae)
1417177_at	2.83245	down	Galk1	galactokinase 1
1426002_a_at	2.78441	down	Cdc7	cell division cycle 7 (S. cerevisiae)
1417190_at	2.38575	down	Nampt	nicotinamide phosphoribosyltransferase
1417192_at	4.86857	down	Tomm70a	translocase of outer mitochondrial membrane 70 homolog A (yeast)
1417212_at	2.42349	down	9530058B02Rik	RIKEN cDNA 9530058B02 gene
1448627_s_at	2.22131	down	Pbk	PDZ binding kinase
1448633_at	2.3261	down	Prpf31	PRP31 pre-mRNA processing factor 31 homolog (yeast)
1448635_at	2.79103	down	Smc2	structural maintenance of chromosomes 2
1417252_at	2.16254	down	Nt5c	5'
1417254_at	2.46448	down	Spata5	spermatogenesis associated 5
1417258_at	3.37868	down	Cct5	chaperonin containing Tcp1
1420196_s_at	2.60873	down	Tbc1d14	TBC1 domain family
1448646_at	2.31598	down	Wdr12	WD repeat domain 12
1417270_at	2.30488	down	Wdr12	WD repeat domain 12
1422418_s_at	2.09045	down	100041294 /// Supt4h1	predicted gene
1430474_a_at	2.41392	down	Mtch2	mitochondrial carrier homolog 2 (C. elegans)
1417317_s_at	3.00385	down	ENSMUSG00000067558 /// ENSMUSG00000067575 /// ENSMUSG00000068674 /// ENSMUSG00000070519 /// Ino80 /// LOC100044516 /// LOC100046034 /// LOC100048620 /// OTTMUSG00000015055 /// OTTMUSG00000021804 /// Rpl35a	predicted gene
1448684_at	4.01308	down	Ppp1r2	protein phosphatase 1
1417344_at	2.13809	down	2900064A13Rik	RIKEN cDNA 2900064A13 gene
1417349_at	2.40818	down	Pldn	pallidin
1417364_at	6.25883	down	Eef1g /// LOC100047986	eukaryotic translation elongation factor 1 gamma /// similar to eukaryotic translation elongation factor 1 gamma
1438278_a_at	3.26297	down	Cwc22	CWC22 spliceosome-associated protein homolog (S. cerevisiae)
1417404_at	2.82203	down	Elovl6	ELOVL family member 6
1417434_at	2.61378	down	Gpd2	glycerol phosphate dehydrogenase 2
1448706_at	3.66036	down	Ttrap	Traf and Tnf receptor associated protein
1454044_a_at	2.02844	down	Pex3	peroxisomal biogenesis factor 3
1417442_a_at	2.25072	down	Pex3	peroxisomal biogenesis factor 3
1417451_a_at	2.5683	down	Ppia	peptidylprolyl isomerase A
1448715_x_at	2.22886	down	100043821 /// Ccrn4l /// Cog6 /// LOC280487 /// Sgip1	predicted gene
1417478_a_at	2.2951	down	Ppp2r3c	protein phosphatase 2
1435151_a_at	2.03852	down	Rps3	ribosomal protein S3
1435712_a_at	4.45218	down	ENSMUSG00000069117 /// LOC100047828 /// Rps18	predicted gene
1448739_x_at	3.3967	down	ENSMUSG00000069117 /// LOC100042388 /// LOC100047329 /// LOC100047828 /// OTTMUSG00000000655 /// Rps18	predicted gene
1448746_at	2.23482	down	Nbn	nibrin
1417533_a_at	2.19464	down	Itgb5	integrin beta 5
1426124_a_at	2.59318	down	Clk1	CDC-like kinase 1
1417541_at	3.67544	down	Hells	helicase
1417608_a_at	2.17479	down	Rpl13a	ribosomal protein L13a
1417615_a_at	2.31128	down	Rpl11	ribosomal protein L11
1448774_at	2.34719	down	Stoml2	stomatin (Epb7.2)-like 2
1417622_at	3.87866	down	Slc12a2	solute carrier family 12
1448780_at	3.76503	down	Slc12a2	solute carrier family 12
1417623_at	2.34165	down	Slc12a2	solute carrier family 12
1448786_at	3.46362	down	1100001H23Rik /// LOC100045163	RIKEN cDNA 1100001H23 gene /// similar to RIKEN cDNA 1100001H23 gene
1417646_a_at	3.29083	down	Snx5	sorting nexin 5
1448791_at	3.82104	down	LOC100048642 /// Snx5	similar to Snx5 protein /// sorting nexin 5
1417647_at	4.53836	down	Snx5	sorting nexin 5
1417648_s_at	3.40698	down	Snx5	sorting nexin 5
1417657_s_at	2.09967	down	Dnajc2	DnaJ (Hsp40) homolog
1417666_at	2.47489	down	Dnttip1	deoxynucleotidyltransferase
1417675_a_at	2.10171	down	Mdn1	midasin homolog (yeast)
1448809_at	2.04015	down	Cse1l	chromosome segregation 1-like (S. cerevisiae)
1417692_at	2.06082	down	Drg2	developmentally regulated GTP binding protein 2
1417695_a_at	2.48922	down	Soat1	sterol O-acyltransferase 1
1448816_at	2.16203	down	Ptgis	prostaglandin I2 (prostacyclin) synthase
1456617_a_at	3.94797	down	Eif2s2	eukaryotic translation initiation factor 2
1417712_at	2.95476	down	Eif2s2	eukaryotic translation initiation factor 2
1448822_at	2.01137	down	Psmb6	proteasome (prosome
1417725_a_at	2.72524	down	Sssca1	Sjogren's syndrome/scleroderma autoantigen 1 homolog (human)
1417737_at	3.99891	down	Mrps31	mitochondrial ribosomal protein S31
1417742_a_at	2.63004	down	Dmap1	DNA methyltransferase 1-associated protein 1
1417762_a_at	3.29974	down	Rpl8	ribosomal protein L8
1417763_at	2.50523	down	LOC636537 /// Ssr1	similar to signal sequence receptor
1417770_s_at	2.32293	down	Psmc6	proteasome (prosome
1417771_a_at	3.1412	down	Psmc6	proteasome (prosome
1431177_a_at	2.21308	down	OTTMUSG00000022086 /// Rpl10a	predicted gene
1417791_a_at	2.44976	down	Zfml	zinc finger
1448846_a_at	3.32187	down	433941 /// 622707 /// EG666642 /// ENSMUSG00000074516 /// LOC100044494 /// OTTMUSG00000007230 /// OTTMUSG00000014710 /// Rpl29	predicted gene
1436046_x_at	2.78706	down	100041859 /// 622707 /// EG666642 /// ENSMUSG00000074516 /// LOC100044494 /// OTTMUSG00000014710 /// OTTMUSG00000023237 /// Rpl29	predicted gene
1417818_at	3.33332	down	Wwtr1	WW domain containing transcription regulator 1
1417840_at	2.94435	down	1500031L02Rik	RIKEN cDNA 1500031L02 gene
1417868_a_at	4.78895	down	Ctsz	cathepsin Z
1417869_s_at	4.89496	down	Ctsz	cathepsin Z
1417870_x_at	3.96661	down	Ctsz	cathepsin Z
1417873_at	2.71509	down	Pwp1	PWP1 homolog (S. cerevisiae)
1417907_at	5.12592	down	Ube2l3	ubiquitin-conjugating enzyme E2L 3
1448882_at	2.03857	down	Tmem93	transmembrane protein 93
1448890_at	4.3502	down	Klf2	Kruppel-like factor 2 (lung)
1417948_s_at	2.1989	down	Ilf2	interleukin enhancer binding factor 2
1448909_a_at	2.78228	down	Mrpl39	mitochondrial ribosomal protein L39
1417966_at	3.29655	down	Mrpl39	mitochondrial ribosomal protein L39
1417969_at	2.10451	down	Fbxo31	F-box protein 31
1417974_at	4.01759	down	Kpna4	karyopherin (importin) alpha 4
1418022_at	2.84489	down	Narg1	NMDA receptor-regulated gene 1
1448921_a_at	2.1886	down	Mrps9	mitochondrial ribosomal protein S9
1418070_at	2.24856	down	Cdyl	chromodomain protein
1418073_at	3.02311	down	Acot9	acyl-CoA thioesterase 9
1449968_s_at	2.58849	down	Acot10 /// Acot9	acyl-CoA thioesterase 10 /// acyl-CoA thioesterase 9
1460224_at	2.7617	down	Snx2	sorting nexin 2
1418124_at	2.18946	down	Tmem85	transmembrane protein 85
1448967_at	2.23042	down	Nipsnap3a	nipsnap homolog 3A (C. elegans)
1448987_at	5.6193	down	Acadl	acyl-Coenzyme A dehydrogenase
1448993_at	2.57955	down	Atg3	autophagy-related 3 (yeast)
1418215_at	2.0377	down	Mep1b	meprin 1 beta
1418248_at	2.88907	down	Gla	galactosidase
1418273_a_at	2.99595	down	677010 /// EG667779 /// OTTMUSG00000005566 /// Rpl30	predicted gene
1449044_at	3.26311	down	Eef1e1	eukaryotic translation elongation factor 1 epsilon 1
1418362_at	2.45532	down	Zfp42	zinc finger protein 42
1449072_a_at	2.21279	down	N6amt2	N-6 adenine-specific DNA methyltransferase 2 (putative)
1418435_at	2.01406	down	Mkrn1	makorin
1418442_at	3.08188	down	Xpo1	exportin 1
1418462_at	3.95134	down	Exosc9	exosome component 9
1418473_at	2.17623	down	Cutc	cutC copper transporter homolog (E.coli)
1418486_at	7.27958	down	Vnn1	vanin 1
1418496_at	15.037	down	Foxa1 /// LOC100047556	forkhead box A1 /// similar to Hepatocyte nuclear factor 3-alpha (HNF-3A) (Forkhead box protein A1)
1418505_at	5.35325	down	Nudt4	nudix (nucleoside diphosphate linked moiety X)-type motif 4
1418515_at	3.8078	down	Mtf2	metal response element binding transcription factor 2
1449119_at	3.14843	down	Arih2	ariadne homolog 2 (Drosophila)
1418530_at	2.89506	down	Nup160	nucleoporin 160
1418543_s_at	2.1903	down	Ccdc43	coiled-coil domain containing 43
1449134_s_at	4.57828	down	Spic	Spi-C transcription factor (Spi-1/PU.1 related)
1418555_x_at	3.09371	down	Spic	Spi-C transcription factor (Spi-1/PU.1 related)
1418560_at	2.8818	down	Pdha1	pyruvate dehydrogenase E1 alpha 1
1449138_at	2.06816	down	Sf3b1	splicing factor 3b
1418564_s_at	2.13017	down	Serbp1	Serpine1 mRNA binding protein 1
1449140_at	2.48863	down	Nudcd2	NudC domain containing 2
1418566_s_at	2.34412	down	Nudcd2	NudC domain containing 2
1418574_a_at	2.22826	down	Shfm1	split hand/foot malformation (ectrodactyly) type 1
1418576_at	2.18362	down	Yipf5	Yip1 domain family
1418584_at	2.66383	down	Ccnh	cyclin H
1449155_at	2.34163	down	Polr3g	polymerase (RNA) III (DNA directed) polypeptide G
1418640_at	2.79762	down	Sirt1	sirtuin 1 (silent mating type information regulation 2
1418700_at	2.20203	down	Lias	lipoic acid synthetase
1449207_a_at	2.1252	down	Kif20a	kinesin family member 20A
1418765_at	2.03558	down	Timd2	T-cell immunoglobulin and mucin domain containing 2
1418766_s_at	2.04952	down	Timd2	T-cell immunoglobulin and mucin domain containing 2
1449243_a_at	2.38014	down	Rps19	ribosomal protein S19
1428137_at	2.156	down	Arl8b	ADP-ribosylation factor-like 8B
1418874_a_at	2.07937	down	Psmd4	proteasome (prosome
1449255_a_at	2.16929	down	Rpl15	ribosomal protein L15
1418885_a_at	2.03467	down	Idh3b	isocitrate dehydrogenase 3 (NAD+) beta
1418886_s_at	2.21773	down	Idh3b	isocitrate dehydrogenase 3 (NAD+) beta
1418887_a_at	3.06997	down	D11Wsu99e	DNA segment
1455211_a_at	2.25522	down	Timm10 /// Timm13	translocase of inner mitochondrial membrane 10 homolog (yeast) /// translocase of inner mitochondrial membrane 13 homolog (yeast)
1418905_at	2.03276	down	Nubp1	nucleotide binding protein 1
1451828_a_at	2.04799	down	Acsl4	acyl-CoA synthetase long-chain family member 4
1418915_at	2.05297	down	Mmachc	methylmalonic aciduria cblC type
1449292_at	2.61178	down	Rb1cc1	RB1-inducible coiled-coil 1
1460247_a_at	3.40735	down	Skp2	S-phase kinase-associated protein 2 (p45)
1418969_at	2.72311	down	Skp2	S-phase kinase-associated protein 2 (p45)
1418986_a_at	2.6855	down	Uxt	ubiquitously expressed transcript
1453106_a_at	2.1304	down	Rnmt	RNA (guanine-7-) methyltransferase
1449323_a_at	7.70248	down	LOC100043000 /// Rpl3	similar to ribosomal protein L3 /// ribosomal protein L3
1419078_at	2.0352	down	Nin	ninein
1449342_at	2.10602	down	Ptplb	protein tyrosine phosphatase-like (proline instead of catalytic arginine)
1419103_a_at	2.02761	down	Abhd6	abhydrolase domain containing 6
1419104_at	4.3761	down	Abhd6	abhydrolase domain containing 6
1419111_at	2.33041	down	Ing2	inhibitor of growth family
1419162_s_at	2.19537	down	Dnajc3	DnaJ (Hsp40) homolog
1419267_at	4.39332	down	Nfyb	nuclear transcription factor-Y beta
1419291_x_at	3.57814	down	Gas5	growth arrest specific 5
1449412_at	2.93246	down	1810046J19Rik	RIKEN cDNA 1810046J19 gene
1419361_at	2.15318	down	Ss18	synovial sarcoma translocation
1419364_a_at	2.62623	down	EG624124 /// LOC634044 /// Rps7	predicted gene
1431423_a_at	2.01897	down	Med8	mediator of RNA polymerase II transcription
1425006_a_at	3.1854	down	Vrk1	vaccinia related kinase 1
1419441_at	2.14578	down	Rplp0	ribosomal protein
1455168_a_at	4.07448	down	Gnb2l1	guanine nucleotide binding protein (G protein)
1419452_at	3.37565	down	Uchl5	ubiquitin carboxyl-terminal esterase L5
1419498_at	3.77164	down	Tmigd1	transmembrane and immunoglobulin domain containing 1
1419499_at	2.32545	down	Gpam	glycerol-3-phosphate acyltransferase
1427432_a_at	2.20263	down	Sfrs10	splicing factor
1419548_at	3.16102	down	Kpna1	karyopherin (importin) alpha 1
1460260_s_at	2.66419	down	Kpna1	karyopherin (importin) alpha 1
1449505_at	2.68111	down	Kpna1	karyopherin (importin) alpha 1
1419549_at	2.45961	down	Arg1	arginase
1449506_a_at	2.35785	down	Eef1d	eukaryotic translation elongation factor 1 delta (guanine nucleotide exchange protein)
1419553_a_at	2.67195	down	Rabggtb	RAB geranylgeranyl transferase
1419577_at	3.03543	down	Fig4	FIG4 homolog (S. cerevisiae)
1449534_at	2.07479	down	Sycp3	synaptonemal complex protein 3
1419656_at	2.39825	down	Slc25a36	solute carrier family 25
1419657_a_at	3.50329	down	Slc25a36	solute carrier family 25
1419736_a_at	2.43805	down	Eif1ay	eukaryotic translation initiation factor 1A
1420365_a_at	4.71457	down	Hnrnpa2b1	heterogeneous nuclear ribonucleoprotein A2/B1
1420376_a_at	2.12172	down	H3f3a /// H3f3b /// LOC100045490	H3 histone
1420386_at	2.17194	down	Seh1l	SEH1-like (S. cerevisiae
1420410_at	2.87592	down	Nr5a2	nuclear receptor subfamily 5
1420476_a_at	2.27609	down	100043064 /// Nap1l1	predicted gene
1429227_x_at	2.33587	down	Nap1l1	nucleosome assembly protein 1-like 1
1420478_at	3.53344	down	Nap1l1	nucleosome assembly protein 1-like 1
1420497_a_at	2.61682	down	Cebpz	CCAAT/enhancer binding protein zeta
1420502_at	3.16311	down	Sat1	spermidine/spermine N1-acetyl transferase 1
1420509_at	2.2121	down	Srfbp1	serum response factor binding protein 1
1420510_at	2.51886	down	LOC636713 /// Srfbp1	similar to SRF-dependent transcription regulation associated protein /// serum response factor binding protein 1
1420535_a_at	2.50801	down	Nub1	negative regulator of ubiquitin-like proteins 1
1420609_at	3.48836	down	2004-03-07	membrane-associated ring finger (C3HC4) 7
1420622_a_at	7.00416	down	Hspa8	heat shock protein 8
1420623_x_at	6.28503	down	Hspa8	heat shock protein 8
1449933_a_at	2.06163	down	Tsen15	tRNA splicing endonuclease 15 homolog (S. cerevisiae)
1420652_at	2.05082	down	Ate1	arginyltransferase 1
1452787_a_at	2.3124	down	Prmt1	protein arginine N-methyltransferase 1
1420711_a_at	2.18292	down	Pxmp3	peroxisomal membrane protein 3
1449962_at	2.06795	down	AV320801 /// EG331529 /// OTTMUSG00000018782 /// Pramel3	expressed sequence AV320801 /// predicted gene
1449972_s_at	3.71954	down	BC018101 /// Zfp97	cDNA sequence BC018101 /// zinc finger protein 97
1420829_a_at	2.34717	down	Ywhaq	tyrosine 3-monooxygenase/tryptophan 5-monooxygenase activation protein
1420830_x_at	2.02642	down	Ywhaq	tyrosine 3-monooxygenase/tryptophan 5-monooxygenase activation protein
1420849_at	2.23497	down	Crnkl1	Crn
1420850_at	2.74127	down	Crnkl1	Crn
1420880_a_at	2.02961	down	Ywhab	tyrosine 3-monooxygenase/tryptophan 5-monooxygenase activation protein
1420897_at	2.33963	down	Snap23	synaptosomal-associated protein 23
1450031_at	2.80383	down	Aff4	AF4/FMR2 family
1420916_at	3.0843	down	Prpf40a	PRP40 pre-mRNA processing factor 40 homolog A (yeast)
1450036_at	2.81502	down	Sgk3	serum/glucocorticoid regulated kinase 3
1420919_at	7.99878	down	Sgk3	serum/glucocorticoid regulated kinase 3
1425718_a_at	6.24184	down	Ivns1abp	influenza virus NS1A binding protein
1450084_s_at	4.77878	down	Ivns1abp	influenza virus NS1A binding protein
1421019_at	2.26048	down	1700021F05Rik	RIKEN cDNA 1700021F05 gene
1421023_at	2.90553	down	Pik3c2a	phosphatidylinositol 3-kinase
1450103_a_at	2.04891	down	Cyth2	cytohesin 2
1421054_at	2.31712	down	Xpo4	exportin 4
1438317_a_at	3.39619	down	Endog	endonuclease G
1421148_a_at	2.57161	down	Tial1	Tia1 cytotoxic granule-associated RNA binding protein-like 1
1450150_a_at	2.9523	down	ENSMUSG00000059776 /// OTTMUSG00000009186 /// OTTMUSG00000025606 /// Rpl13	predicted gene
1421205_at	2.02321	down	Atm	ataxia telangiectasia mutated homolog (human)
1421346_a_at	2.063	down	Slc6a6	solute carrier family 6 (neurotransmitter transporter
1426709_a_at	5.52146	down	Usp33	ubiquitin specific peptidase 33
1450264_a_at	4.0862	down	Chka	choline kinase alpha
1450285_at	2.75786	down	100039202 /// LOC100040390 /// Ube1y1	predicted gene
1421624_a_at	2.78177	down	Enah	enabled homolog (Drosophila)
1426404_a_at	4.52857	down	Rnf11	ring finger protein 11
1421750_a_at	2.07766	down	Vbp1	von Hippel-Lindau binding protein 1
1421751_a_at	2.2824	down	Psmd14	proteasome (prosome
1421772_a_at	2.72992	down	Cox7a2l	cytochrome c oxidase subunit VIIa polypeptide 2-like
1421819_a_at	2.52682	down	671392 /// Set	predicted gene
1421847_at	2.67998	down	Wsb2	WD repeat and SOCS box-containing 2
1450396_at	3.74658	down	Stag2	stromal antigen 2
1421849_at	5.43083	down	Stag2	stromal antigen 2
1421852_at	2.16704	down	Kcnk5	potassium channel
1421872_at	4.42441	down	Rab24	RAB24
1421884_at	2.88451	down	Sos1	Son of sevenless homolog 1 (Drosophila)
1421894_a_at	2.24491	down	Tpp2	tripeptidyl peptidase II
1421914_s_at	5.16092	down	Mrpl19	mitochondrial ribosomal protein L19
1456436_x_at	2.00182	down	Rps20	ribosomal protein S20
1421968_a_at	2.63369	down	Nipa2	non imprinted in Prader-Willi/Angelman syndrome 2 homolog (human)
1422045_a_at	2.10057	down	Ptpn12	protein tyrosine phosphatase
1460308_a_at	2.38314	down	Ict1	immature colon carcinoma transcript 1
1426793_a_at	3.90651	down	ENSMUSG00000046721 /// Rpl14	predicted gene
1422128_at	4.85445	down	Rpl14	ribosomal protein L14
1422156_a_at	2.66596	down	EG546164 /// EG620248 /// EG667279 /// EG667846 /// LOC100043752 /// OTTMUSG00000002567 /// OTTMUSG00000006497 /// OTTMUSG00000017346 /// Rps2	predicted gene
1422241_a_at	2.43689	down	Ndufa1	NADH dehydrogenase (ubiquinone) 1 alpha subcomplex
1422307_at	2.0023	down	Sppl3	Signal peptide peptidase 3
1422430_at	2.46795	down	Fignl1	fidgetin-like 1
1436586_x_at	2.16576	down	Rps14	ribosomal protein S14
1450624_at	9.67742	down	Bhmt	betaine-homocysteine methyltransferase
1422439_a_at	2.51828	down	Cdk4 /// LOC640611	cyclin-dependent kinase 4 /// similar to Cell division protein kinase 4 (Cyclin-dependent kinase 4) (PSK-J3) (CRK3)
1422441_x_at	2.29269	down	Cdk4	cyclin-dependent kinase 4
1422449_s_at	2.12452	down	Rcn2	reticulocalbin 2
1422453_at	2.10319	down	Prpf8	pre-mRNA processing factor 8
1422463_a_at	2.01721	down	Mrpl3	mitochondrial ribosomal protein L3
1454694_a_at	2.48848	down	Top2a	topoisomerase (DNA) II alpha
1422470_at	2.1356	down	Bnip3	BCL2/adenovirus E1B interacting protein 3
1422475_a_at	4.68482	down	EG668144 /// ENSMUSG00000062611 /// Rps3a	predicted gene
1422484_at	3.95942	down	Cycs	cytochrome c
1422487_at	2.60109	down	LOC100048076 /// Smad4	similar to MAD homolog 4 (Drosophila) /// MAD homolog 4 (Drosophila)
1422489_at	2.35053	down	Gcs1	glucosidase 1
1422491_a_at	2.27937	down	Bnip2	BCL2/adenovirus E1B interacting protein 2
1422503_s_at	2.29312	down	Parp1	poly (ADP-ribose) polymerase family
1422506_a_at	7.87556	down	Cstb	cystatin B
1422508_at	2.38986	down	Atp6v1a	ATPase
1450635_at	2.49046	down	Akp5	alkaline phosphatase 5
1422535_at	3.31605	down	Ccne2	cyclin E2
1422547_at	2.53174	down	Ranbp1	RAN binding protein 1
1422570_at	2.33294	down	Yy1	YY1 transcription factor
1450664_at	6.11745	down	Gabpa	GA repeat binding protein
1450665_at	2.23702	down	Gabpa	GA repeat binding protein
1422595_s_at	2.22829	down	5730470L24Rik	RIKEN cDNA 5730470L24 gene
1422599_s_at	2.58634	down	Zfp143	zinc finger protein 143
1422608_at	2.16666	down	Arpp19 /// LOC632823	cAMP-regulated phosphoprotein 19 /// similar to cyclic AMP phosphoprotein
1422613_a_at	3.43275	down	EG434426 /// EG666669 /// Rpl7a	predicted gene
1422621_at	2.046	down	Ranbp2	RAN binding protein 2
1450690_at	5.75421	down	Ranbp2	RAN binding protein 2
1450701_a_at	2.06428	down	Gtf2h2	general transcription factor II H
1422650_a_at	2.21137	down	Riok3	RIO kinase 3 (yeast)
1422660_at	2.58422	down	Rbm3	RNA binding motif protein 3
1422662_at	3.31123	down	Lgals8	lectin
1422671_s_at	3.28075	down	Naalad2	N-acetylated alpha-linked acidic dipeptidase 2
1422702_at	2.17353	down	Azin1	antizyme inhibitor 1
1422716_a_at	2.00981	down	Acp1 /// LOC631286	acid phosphatase 1
1450721_at	2.57177	down	Acp1 /// LOC631286	acid phosphatase 1
1422747_at	2.46512	down	Chek2	CHK2 checkpoint homolog (S. pombe)
1422768_at	2.33777	down	Syncrip	synaptotagmin binding
1422769_at	2.07664	down	Syncrip	synaptotagmin binding
1450744_at	2.63894	down	Ell2	elongation factor RNA polymerase II 2
1422792_at	3.20906	down	Pafah1b2	platelet-activating factor acetylhydrolase
1422836_at	2.42384	down	Mbnl3	muscleblind-like 3 (Drosophila)
1422850_at	2.29762	down	Pabpn1	poly(A) binding protein
1422855_at	3.2121	down	Cpsf3	cleavage and polyadenylation specificity factor 3
1422881_s_at	2.19472	down	Sypl	synaptophysin-like protein
1453362_x_at	2.11221	down	EG629116 /// LOC677113 /// Rps24	predicted gene
1423030_at	2.05541	down	Vcp	valosin containing protein
1425241_a_at	3.1262	down	Wsb1	WD repeat and SOCS box-containing 1
1450840_a_at	2.20975	down	Rpl39	ribosomal protein L39
1423041_a_at	2.16539	down	Bzw1	basic leucine zipper and W2 domains 1
1423042_at	2.16164	down	Ddx3x	DEAD/H (Asp-Glu-Ala-Asp/His) box polypeptide 3
1460323_at	3.05849	down	Tars	threonyl-tRNA synthetase
1450853_at	3.047	down	Tle4	transducin-like enhancer of split 4
1455767_x_at	2.23671	down	ENSMUSG00000058640 /// ENSMUSG00000061115 /// ENSMUSG00000066180 /// ENSMUSG00000066443 /// ENSMUSG00000068397 /// LOC100044606 /// LOC100045641 /// LOC100046290 /// LOC100047314 /// LOC100048241 /// LOC675980 /// OTTMUSG00000017565 /// OTTMUSG00000019286	predicted gene
1423080_at	2.23234	down	LOC100044630 /// OTTMUSG00000016825 /// Tomm20	similar to Translocase of outer mitochondrial membrane 20 homolog (yeast) /// predicted gene
1423081_a_at	2.88606	down	Tomm20	translocase of outer mitochondrial membrane 20 homolog (yeast)
1423089_at	2.1914	down	Tmod3	tropomodulin 3
1423095_s_at	2.13209	down	Crbn	cereblon
1423106_at	2.96246	down	Ube2b	ubiquitin-conjugating enzyme E2B
1423107_at	2.58424	down	Ube2b	ubiquitin-conjugating enzyme E2B
1423108_at	2.34586	down	Slc25a20	solute carrier family 25 (mitochondrial carnitine/acylcarnitine translocase)
1423109_s_at	2.34725	down	Slc25a20	solute carrier family 25 (mitochondrial carnitine/acylcarnitine translocase)
1450860_at	2.73003	down	Lap3	leucine aminopeptidase 3
1423131_at	3.71981	down	100042660 /// 5730427N09Rik /// 675063 /// EG239338 /// EG433230 /// EG547215 /// EG623804 /// EG627895 /// EG629436 /// EG665356 /// EG666180 /// EG677785 /// LOC636306 /// OTTMUSG00000024175	predicted gene
1450871_a_at	2.29166	down	Bcat1	branched chain aminotransferase 1
1434888_a_at	5.07209	down	Matr3	matrin 3
1423156_at	4.07543	down	Gnpnat1	glucosamine-phosphate N-acetyltransferase 1
1423157_at	2.53934	down	Gnpnat1	glucosamine-phosphate N-acetyltransferase 1
1423169_at	2.11058	down	Taf7	TAF7 RNA polymerase II
1423192_at	2.46574	down	Pspc1	paraspeckle protein 1
1450897_at	4.6445	down	Arhgap5	Rho GTPase activating protein 5
1423195_at	2.05541	down	Hiat1	hippocampus abundant gene transcript 1
1450904_at	3.35019	down	Tmem167	transmembrane protein 167
1423220_at	3.32095	down	Eif4e	eukaryotic translation initiation factor 4E
1450909_at	2.53513	down	Eif4e	eukaryotic translation initiation factor 4E
1423251_at	3.47975	down	Luc7l2	LUC7-like 2 (S. cerevisiae)
1423262_a_at	2.80867	down	EG623365 /// H3f3a /// H3f3b /// LOC100045490 /// OTTMUSG00000007855 /// OTTMUSG00000016509	predicted gene
1423263_at	2.65824	down	EG544973 /// EG623365 /// EG627371 /// EG636952 /// H3f3a /// H3f3b /// LOC100045490 /// OTTMUSG00000016509	predicted gene
1423275_at	2.92881	down	Ints6	integrator complex subunit 6
1423299_at	3.20843	down	Txnl1	thioredoxin-like 1
1450934_at	2.56587	down	Eif4a2	eukaryotic translation initiation factor 4A2
1423322_at	2.69299	down	Lin7c	lin-7 homolog C (C. elegans)
1450937_at	2.19288	down	Lin7c	lin-7 homolog C (C. elegans)
1423347_at	2.53962	down	Sec23a	SEC23A (S. cerevisiae)
1450950_at	2.49622	down	Smc3	structural maintenace of chromosomes 3
1450953_at	2.18906	down	Ciao1	cytosolic iron-sulfur protein assembly 1 homolog (S. cerevisiae)
1423361_at	2.04067	down	Yme1l1	YME1-like 1 (S. cerevisiae)
1450954_at	4.54767	down	Yme1l1	YME1-like 1 (S. cerevisiae)
1423369_at	2.65184	down	Fmr1	fragile X mental retardation syndrome 1 homolog
1423390_at	2.70925	down	Siah1a	seven in absentia 1A
1450986_at	3.27463	down	Nol5	nucleolar protein 5
1450989_at	11.6761	down	Tdgf1	teratocarcinoma-derived growth factor 1
1423447_at	2.71969	down	Clpx	caseinolytic peptidase X (E.coli)
1423451_at	2.39007	down	Pgrmc1	progesterone receptor membrane component 1
1423455_at	3.21852	down	ENSMUSG00000045799 /// Ptma	predicted gene
1423465_at	2.73214	down	Frrs1 /// LOC100046401	ferric-chelate reductase 1 /// similar to SDR2
1423479_at	3.47125	down	Nol11	nucleolar protein 11
1423497_at	2.6983	down	Klhl10	kelch-like 10 (Drosophila)
1423517_at	2.06701	down	Cct6a	chaperonin containing Tcp1
1423531_a_at	4.0625	down	Hnrnpa1	heterogeneous nuclear ribonucleoprotein A1
1423535_at	5.25571	down	Strn3	striatin
1451015_at	2.75771	down	Tkt	transketolase
1423545_a_at	2.29924	down	Zfp207	zinc finger protein 207
1451021_a_at	2.27229	down	Klf5	Kruppel-like factor 5
1423567_a_at	3.89792	down	Psma7	proteasome (prosome
1423568_at	2.2373	down	Psma7	proteasome (prosome
1451035_a_at	2.73321	down	Akr1a4	aldo-keto reductase family 1
1451044_at	2.47709	down	Sip1	survival of motor neuron protein interacting protein 1
1451052_at	2.42342	down	Cog8 /// Pdf	component of oligomeric golgi complex 8 /// peptide deformylase (mitochondrial)
1451064_a_at	2.24165	down	Psat1	phosphoserine aminotransferase 1
1423643_at	2.04687	down	Ddx39	DEAD (Asp-Glu-Ala-Asp) box polypeptide 39
1423662_at	5.52874	down	Atp6ap2	ATPase
1420131_s_at	2.24657	down	Pttg1ip	pituitary tumor-transforming 1 interacting protein
1451076_s_at	4.13902	down	Eif3m	eukaryotic translation initiation factor 3
1423665_a_at	3.57911	down	OTTMUSG00000022843 /// Rpl5	predicted gene
1423667_at	3.93759	down	Mat2a	methionine adenosyltransferase II
1435112_a_at	2.19705	down	Atp5h	ATP synthase
1423696_a_at	2.66763	down	Psmd6	proteasome (prosome
1423697_at	2.88221	down	Psmd6	proteasome (prosome
1423711_at	4.0877	down	Ndufaf1	NADH dehydrogenase (ubiquinone) 1 alpha subcomplex
1423722_at	3.32001	down	Tmem49	transmembrane protein 49
1423723_s_at	4.63602	down	Tardbp	TAR DNA binding protein
1423728_at	3.19379	down	Eif3l	eukaryotic translation initiation factor 3
1423735_a_at	2.12018	down	Wdr36	WD repeat domain 36
1451087_at	2.26716	down	Wdr36	WD repeat domain 36
1423737_at	2.07653	down	Ndufs3	NADH dehydrogenase (ubiquinone) Fe-S protein 3
1423766_at	2.65744	down	Pak1ip1	PAK1 interacting protein 1
1423787_at	3.42681	down	Nup133	nucleoporin 133
1423795_at	5.39524	down	Sfpq	splicing factor proline/glutamine rich (polypyrimidine tract binding protein associated)
1423796_at	2.65706	down	Sfpq	splicing factor proline/glutamine rich (polypyrimidine tract binding protein associated)
1428631_a_at	2.69206	down	Uqcrc2	ubiquinol cytochrome c reductase core protein 2
1423811_at	2.70791	down	Sf3a3	splicing factor 3a
1451128_s_at	2.10606	down	Kif22	kinesin family member 22
1451130_at	2.01859	down	Use1	unconventional SNARE in the ER 1 homolog (S. cerevisiae)
1423839_a_at	2.74923	down	Btf3	basic transcription factor 3
1436007_a_at	3.44179	down	LOC100048066 /// Thumpd1	similar to THUMP domain containing 1 /// THUMP domain containing 1
1423855_x_at	2.29685	down	ENSMUSG00000066475 /// ENSMUSG00000067748 /// ENSMUSG00000070510 /// LOC100041933 /// LOC100045527 /// LOC100046300 /// Rpl17	predicted gene
1420129_s_at	2.09605	down	D10Wsu52e	DNA segment
1455725_a_at	2.16919	down	H3f3a /// H3f3b /// LOC100045490	H3 histone
1451164_a_at	2.01482	down	Mrps18b	mitochondrial ribosomal protein S18B
1451166_a_at	3.62926	down	Ccdc101 /// LOC100047712	coiled-coil domain containing 101 /// similar to coiled-coil domain containing 101
1451175_at	2.68	down	Spcs3	signal peptidase complex subunit 3 homolog (S. cerevisiae)
1451184_at	2.00994	down	EG627828 /// Hnrnpa3 /// LOC100045099 /// OTTMUSG00000004599	predicted gene
1423960_at	2.15898	down	Lpcat3	lysophosphatidylcholine acyltransferase 3
1451199_at	2.04215	down	Qtrtd1	queuine tRNA-ribosyltransferase domain containing 1
1424005_at	3.32516	down	B230219D22Rik	RIKEN cDNA B230219D22 gene
1451205_at	3.03859	down	Psmb4	proteasome (prosome
1451214_at	2.21562	down	Kbtbd2	kelch repeat and BTB (POZ) domain containing 2
1424033_at	5.76963	down	Sfrs7	splicing factor
1424883_s_at	4.4284	down	Sfrs7	splicing factor
1424043_at	2.70909	down	Ppil4	peptidylprolyl isomerase (cyclophilin)-like 4
1451286_s_at	2.07706	down	Fus	fusion
1451223_a_at	2.13784	down	Btf3l4	basic transcription factor 3-like 4
1424075_at	2.38635	down	9430016H08Rik	RIKEN cDNA 9430016H08 gene
1451231_a_at	2.19249	down	Cul2	cullin 2
1424094_at	2.35244	down	Nek9	NIMA (never in mitosis gene a)-related expressed kinase 9
1424110_a_at	3.60421	down	LOC100046344 /// Nme1	similar to Nucleoside diphosphate kinase A (NDK A) (NDP kinase A) (Tumor metastatic process-associated protein) (Metastasis inhibition factor NM23) (NDPK-A) (nm23-M1) /// non-metastatic cells 1
1425830_a_at	2.42504	down	2810452K22Rik	RIKEN cDNA 2810452K22 gene
1424123_at	3.70113	down	Mfsd7c	major facilitator superfamily domain containing 7C
1426260_a_at	2.72778	down	LOC632297 /// Ugt1a1 /// Ugt1a10 /// Ugt1a2 /// Ugt1a5 /// Ugt1a6a /// Ugt1a6b /// Ugt1a7c /// Ugt1a9	similar to UDP glycosyltransferase 1 family
1424126_at	2.53917	down	Alas1	aminolevulinic acid synthase 1
1451247_at	2.42303	down	Mfsd1	major facilitator superfamily domain containing 1
1424129_at	2.25798	down	Mfsd1	major facilitator superfamily domain containing 1
1451254_at	4.1968	down	Ikbkap	inhibitor of kappa light polypeptide enhancer in B-cells
1451266_at	2.58905	down	Mrpl50	mitochondrial ribosomal protein L50
1460353_at	2.88955	down	Tmem48	transmembrane protein 48
1424200_s_at	3.18047	down	Seh1l	SEH1-like (S. cerevisiae
1460354_a_at	2.19104	down	Mrpl13	mitochondrial ribosomal protein L13
1424205_at	3.13935	down	Smarca5	SWI/SNF related
1424215_at	3.4935	down	Fundc1	FUN14 domain containing 1
1424216_a_at	2.35071	down	Papola	poly (A) polymerase alpha
1424243_at	2.45282	down	Rwdd4a	RWD domain containing 4A
1424250_a_at	2.65759	down	Arhgef3	Rho guanine nucleotide exchange factor (GEF) 3
1424252_at	2.10107	down	Hnrpdl	heterogeneous nuclear ribonucleoprotein D-like
1451741_a_at	2.51272	down	Cdk7	cyclin-dependent kinase 7 (homolog of Xenopus MO15 cdk-activating kinase)
1424276_at	2.03812	down	Snx16	sorting nexin 16
1451297_at	3.33711	down	Gulo	gulonolactone (L-) oxidase
1424285_s_at	2.64864	down	Arl6ip4 /// LOC100048046	ADP-ribosylation factor-like 6 interacting protein 4 /// similar to SRp25 nuclear protein
1451313_a_at	5.76539	down	1110067D22Rik	RIKEN cDNA 1110067D22 gene
1424318_at	3.32492	down	1110067D22Rik	RIKEN cDNA 1110067D22 gene
1424319_at	2.09042	down	Oraov1	oral cancer overexpressed 1
1424333_at	2.06561	down	Rg9mtd1	RNA (guanine-9-) methyltransferase domain containing 1
1424342_at	2.7625	down	Fyttd1	forty-two-three domain containing 1
1424343_a_at	5.27938	down	Eif1a	eukaryotic translation initiation factor 1A
1424344_s_at	5.47142	down	Eif1a	eukaryotic translation initiation factor 1A
1424347_at	2.43521	down	Ppp6c	protein phosphatase 6
1424353_at	2.37334	down	Lrpprc	leucine-rich PPR-motif containing
1424420_at	3.38253	down	Ccpg1	cell cycle progression 1
1424436_at	2.26254	down	Gart	phosphoribosylglycinamide formyltransferase
1424448_at	3.96111	down	Trim6	tripartite motif-containing 6
1424458_at	3.0241	down	Jmjd2c	jumonji domain containing 2C
1424473_at	2.18072	down	Polr2h	polymerase (RNA) II (DNA directed) polypeptide H
1451366_at	2.0176	down	Cops6	COP9 (constitutive photomorphogenic) homolog
1424501_at	3.69546	down	Utp6	UTP6
1424522_at	2.09185	down	Heatr1	HEAT repeat containing 1
1424541_at	3.90824	down	Tmem70	transmembrane protein 70
1424562_a_at	2.17249	down	Slc25a4	solute carrier family 25 (mitochondrial carrier
1434897_a_at	5.73726	down	Slc25a4	solute carrier family 25 (mitochondrial carrier
1424573_at	2.71537	down	LOC100046567 /// Tmed5	similar to Transmembrane emp24 protein transport domain containing 5 /// transmembrane emp24 protein transport domain containing 5
1424574_at	3.17731	down	LOC100046567 /// Tmed5	similar to Transmembrane emp24 protein transport domain containing 5 /// transmembrane emp24 protein transport domain containing 5
1424579_at	2.39776	down	Slc35a3	solute carrier family 35 (UDP-N-acetylglucosamine (UDP-GlcNAc) transporter)
1424591_at	4.96802	down	5830433M19Rik	RIKEN cDNA 5830433M19 gene
1424635_at	2.2374	down	Eef1a1	eukaryotic translation elongation factor 1 alpha 1
1424641_a_at	2.27575	down	Thoc1	THO complex 1
1451436_at	2.92778	down	Sbno1	sno
1424682_at	2.36926	down	Gpn3	GPN-loop GTPase 3
1424706_at	5.06926	down	LOC100044272 /// Zfp51	hypothetical protein LOC100044272 /// zinc finger protein 51
1424736_at	2.12005	down	Eef2	eukaryotic translation elongation factor 2
1424749_at	2.02782	down	Wdfy1	WD repeat and FYVE domain containing 1
1424750_at	2.49876	down	Zbtb1	zinc finger and BTB domain containing 1
1424777_at	2.43283	down	Wdr21	WD repeat domain 21
1424786_s_at	2.05113	down	Wdr45	WD repeat domain 45
1424788_at	2.03168	down	Kri1	KRI1 homolog (S. cerevisiae)
1460367_at	2.00975	down	Hbp1	high mobility group box transcription factor 1
1424803_at	2.35627	down	BC020002	cDNA sequence BC020002
1424810_at	3.66068	down	Tasp1	taspase
1424814_a_at	2.0659	down	Bcl2l14	BCL2-like 14 (apoptosis facilitator)
1424820_a_at	2.09843	down	LOC100046168 /// Ndfip1	similar to Nedd4 WW domain-binding protein 5 /// Nedd4 family interacting protein 1
1424858_at	3.4056	down	L2hgdh	L-2-hydroxyglutarate dehydrogenase
1451531_at	2.17504	down	Cbwd1	COBW domain containing 1
1425018_at	2.13	down	Mcts1	malignant T cell amplified sequence 1
1425020_at	5.30275	down	EG621629 /// Ubxn2a	predicted gene
1425030_at	2.92948	down	Zfp622	zinc finger protein 622
1425048_a_at	3.25387	down	ENSMUSG00000060128 /// Hmgb1 /// LOC100045876 /// LOC100045972 /// LOC100048378 /// OTTMUSG00000007516 /// OTTMUSG00000020977	predicted gene
1425058_at	2.36914	down	Zfp472	zinc finger protein 472
1425098_at	2.19705	down	Zfp106	zinc finger protein 106
1425129_a_at	2.13866	down	Taldo1	transaldolase 1
1425134_a_at	3.03309	down	Pigx	phosphatidylinositol glycan anchor biosynthesis
1425140_at	2.03504	down	Lactb2	lactamase
1425149_a_at	3.00946	down	Pdcl	phosducin-like
1425183_a_at	2.31112	down	Rpl4	ribosomal protein L4
1451622_at	2.61992	down	Lmbrd1	LMBR1 domain containing 1
1425189_a_at	2.20235	down	Mrpl15	mitochondrial ribosomal protein L15
1451626_x_at	2.29432	down
1425198_at	2.75322	down	Ptpn2	protein tyrosine phosphatase
1425255_s_at	2.74049	down	Hnrpll	heterogeneous nuclear ribonucleoprotein L-like
1419976_s_at	2.55864	down	Nfatc3	nuclear factor of activated T-cells
1425328_at	2.33158	down	Fam76a	family with sequence similarity 76
1425332_at	4.73009	down	Zfp106	zinc finger protein 106
1425350_a_at	2.25919	down	Myef2	myelin basic protein expression factor 2
1425415_a_at	3.15883	down	Slc1a1	solute carrier family 1 (neuronal/epithelial high affinity glutamate transporter
1451703_s_at	2.31717	down	Aprt	adenine phosphoribosyl transferase
1425464_at	2.20093	down	Gata6	GATA binding protein 6
1451722_s_at	2.03919	down	Smyd5	SET and MYND domain containing 5
1451724_at	2.04267	down	Ankmy2	ankyrin repeat and MYND domain containing 2
1425492_at	2.65773	down	Bmpr1a	bone morphogenetic protein receptor
1425498_at	10.7284	down	Prpf4b	PRP4 pre-mRNA processing factor 4 homolog B (yeast)
1425508_s_at	2.16396	down	Arfrp1	ADP-ribosylation factor related protein 1
1425537_at	7.16528	down	Ppm1a	protein phosphatase 1A
1425554_a_at	2.13033	down	Cdc16	CDC16 cell division cycle 16 homolog (S. cerevisiae)
1425562_s_at	2.81105	down	Trnt1	tRNA nucleotidyl transferase
1425568_a_at	2.9999	down	Tmem33	transmembrane protein 33
1451770_s_at	2.03634	down	Dhx9	DEAH (Asp-Glu-Ala-His) box polypeptide 9
1452036_a_at	3.3163	down	Tmpo	thymopoietin
1425848_a_at	2.43264	down	Dusp26	dual specificity phosphatase 26 (putative)
1425974_a_at	2.1632	down	Trim25	tripartite motif-containing 25
1428119_a_at	2.08658	down	LOC100047558 /// Rap2c	similar to RAP2C
1426146_a_at	2.05156	down	Chpt1	choline phosphotransferase 1
1451967_x_at	2.04792	down	Kpnb1	karyopherin (importin) beta 1
1426219_at	2.2188	down	Scp2	sterol carrier protein 2
1451988_s_at	3.43155	down	Chmp4b /// LOC674706	chromatin modifying protein 4B /// similar to zinc finger protein 341
1426243_at	2.71339	down	Cth	cystathionase (cystathionine gamma-lyase)
1426259_at	3.3163	down	Pank3	pantothenate kinase 3
1426271_at	3.7447	down	Smc5	structural maintenance of chromosomes 5
1426290_at	2.00427	down	Dimt1	DIM1 dimethyladenosine transferase 1-like (S. cerevisiae)
1452049_at	2.02275	down	Rpl7l1	ribosomal protein L7-like 1
1426395_s_at	2.47625	down	Eif3j	eukaryotic translation initiation factor 3
1452053_a_at	3.93747	down	Tmem33	transmembrane protein 33
1426402_at	8.74703	down	Syncrip	synaptotagmin binding
1426407_at	2.25274	down	Cugbp1	CUG triplet repeat
1426419_at	2.33842	down	Rbm26	RNA binding motif protein 26
1426425_at	2.59196	down	Sugt1	SGT1
1430053_a_at	8.21438	down	Ola1	Obg-like ATPase 1
1426436_at	2.44225	down	Tmem159	transmembrane protein 159
1426441_at	3.16203	down	Slc11a2	solute carrier family 11 (proton-coupled divalent metal ion transporters)
1452086_at	2.22663	down	Trmt5	TRM5 tRNA methyltransferase 5 homolog (S. cerevisiae)
1452110_at	3.45849	down	Mtrr	5-methyltetrahydrofolate-homocysteine methyltransferase reductase
1426584_a_at	2.4178	down	Sord	sorbitol dehydrogenase
1426593_a_at	2.29275	down	Fbxo22	F-box protein 22
1426609_at	2.06148	down	Dis3	DIS3 mitotic control homolog (S. cerevisiae)
1426611_at	2.96224	down	Psmc2	proteasome (prosome
1426645_at	3.08521	down	Hsp90aa1	heat shock protein 90
1426657_s_at	2.81518	down	EG666036 /// EG666422 /// EG666875 /// EG668576 /// Phgdh	predicted gene
1426659_a_at	2.97313	down	100041163 /// 100041478 /// ENSMUSG00000063556 /// LOC100046821 /// Rpl23a	predicted gene
1426660_x_at	2.43901	down	100041163 /// 100041478 /// ENSMUSG00000063556 /// ENSMUSG00000071532 /// LOC100046821 /// Rpl23a	predicted gene
1426661_at	2.01755	down	EG665189 /// Rpl27a	predicted gene
1426666_a_at	2.15621	down	Unc84a	unc-84 homolog A (C. elegans)
1426675_at	7.46073	down	Tomm70a	translocase of outer mitochondrial membrane 70 homolog A (yeast)
1426676_s_at	3.26506	down	Tomm70a	translocase of outer mitochondrial membrane 70 homolog A (yeast)
1426682_at	2.06319	down	Cnot6	CCR4-NOT transcription complex
1436609_a_at	2.06311	down	Lrpap1	low density lipoprotein receptor-related protein associated protein 1
1452148_at	3.02906	down	Lrpap1	low density lipoprotein receptor-related protein associated protein 1
1426698_a_at	2.02071	down	Hnrnpm	heterogeneous nuclear ribonucleoprotein M
1426707_at	2.08536	down	Tubgcp3	tubulin
1452157_at	2.21511	down	Eprs	glutamyl-prolyl-tRNA synthetase
1426718_at	3.33265	down	Skiv2l2	superkiller viralicidic activity 2-like 2 (S. cerevisiae)
1426728_x_at	2.29929	down	Ptdss2	phosphatidylserine synthase 2
1452167_at	2.32016	down	2810407C02Rik	RIKEN cDNA 2810407C02 gene
1426736_at	2.85603	down	Gspt1	G1 to S phase transition 1
1452168_x_at	2.98812	down	Gspt1	G1 to S phase transition 1
1426741_a_at	2.33082	down	Fastkd2	FAST kinase domains 2
1452176_at	2.6896	down	Nup153	nucleoporin 153
1426759_at	2.68049	down	Map4k3	mitogen-activated protein kinase kinase kinase kinase 3
1426775_s_at	2.70037	down	Scamp1	secretory carrier membrane protein 1
1452192_at	8.75459	down	Naf1	nuclear assembly factor 1 homolog (S. cerevisiae)
1452203_at	6.70161	down	Obfc2a	oligonucleotide/oligosaccharide-binding fold containing 2A
1426806_at	3.54458	down	Obfc2a	oligonucleotide/oligosaccharide-binding fold containing 2A
1426813_at	2.83538	down	Ltv1	LTV1 homolog (S. cerevisiae)
1452206_at	2.30193	down	Sucla2	succinate-Coenzyme A ligase
1426819_at	5.96343	down
1426836_s_at	3.21414	down	Metap1	methionyl aminopeptidase 1
1426839_at	2.83483	down	Pold3	polymerase (DNA-directed)
1426853_at	3.1897	down	671392 /// Set	predicted gene
1426863_at	2.29671	down	Rbmx	RNA binding motif protein
1426870_at	2.62205	down	Fbxo33	F-box protein 33
1426877_a_at	2.31114	down	Pbrm1	polybromo 1
1452224_at	2.51601	down	Morc3	microrchidia 3
1420091_s_at	2.69166	down	Morc3	microrchidia 3
1452226_at	2.36151	down	LOC100047340 /// Rcc2	hypothetical protein LOC100047340 /// regulator of chromosome condensation 2
1452234_s_at	2.0562	down	Tmem191c	transmembrane protein 191C
1452241_at	2.39026	down	Topbp1	topoisomerase (DNA) II binding protein 1
1460401_at	3.32264	down	Edem3	ER degradation enhancer
1426939_at	3.62864	down	Tsr2	TSR2
1426946_at	3.5665	down	Ipo5	importin 5
1426948_at	2.29779	down	Tpr	translocated promoter region
1426958_at	2.81306	down	Rps9	ribosomal protein S9
1452256_at	2.29676	down	1110002N22Rik	RIKEN cDNA 1110002N22 gene
1452276_at	2.85816	down	Smarcad1	SWI/SNF-related
1427032_at	2.42866	down	Herc4	hect domain and RLD 4
1427058_at	2.03729	down	Eif4a1	eukaryotic translation initiation factor 4A1
1427090_at	2.0122	down	Zbed4	zinc finger
1427094_at	2.31571	down	Pole2	polymerase (DNA directed)
1427114_at	2.10856	down	Ttc19	tetratricopeptide repeat domain 19
1452318_a_at	9.89934	down	Hspa1b	heat shock protein 1B
1427126_at	11.0748	down	Hspa1b	heat shock protein 1B
1427127_x_at	9.24969	down	Hspa1b	heat shock protein 1B
1427131_s_at	8.41943	down	Lrrc58	leucine rich repeat containing 58
1427144_at	7.42553	down	Hnrpll	heterogeneous nuclear ribonucleoprotein L-like
1427296_at	2.8628	down	Fam120a	family with sequence similarity 120
1427302_at	2.52018	down	Enpp3	ectonucleotide pyrophosphatase/phosphodiesterase 3
1452388_at	6.45395	down	Hspa1a	heat shock protein 1A
1452458_s_at	3.12476	down	Ppil5	peptidylprolyl isomerase (cyclophilin) like 5
1452496_at	2.35398	down	Atp11c	ATPase
1427875_a_at	5.88031	down	100043876 /// ENSMUSG00000066116 /// LOC100048552 /// Rpl34	predicted gene
1427881_at	4.2773	down	Dnttip2	deoxynucleotidyltransferase
1427882_at	2.36283	down	Dnttip2	deoxynucleotidyltransferase
1433721_x_at	2.12106	down	Rps21	ribosomal protein S21
1452598_at	4.31729	down	Gins1	GINS complex subunit 1 (Psf1 homolog)
1427923_at	2.85517	down	Zmpste24	zinc metallopeptidase
1427930_at	2.53133	down	Pdxk	pyridoxal (pyridoxine
1460519_a_at	2.29284	down	Mettl5	methyltransferase like 5
1427971_at	2.88217	down	Cdc73	cell division cycle 73
1428061_at	2.77459	down	Hat1	histone aminotransferase 1
1452648_at	2.69696	down	Tbrg1	transforming growth factor beta regulated gene 1
1452649_at	2.61791	down	Rtn4	reticulon 4
1428075_at	2.1487	down	100041273 /// 100042503 /// Ndufb4	predicted gene
1428081_at	2.11727	down	Klhl21	kelch-like 21 (Drosophila)
1428083_at	2.10703	down	2310043N10Rik	RIKEN cDNA 2310043N10 gene
1428084_at	2.02345	down	Krr1	KRR1
1452660_s_at	2.06804	down	Klhl7	kelch-like 7 (Drosophila)
1460429_at	2.93122	down	Cdc5l	cell division cycle 5-like (S. pombe)
1452661_at	3.33685	down	Tfrc	transferrin receptor
1428094_at	7.91026	down	Lamp2	lysosomal-associated membrane protein 2
1428096_at	2.07749	down	Ipo11	importin 11
1428103_at	2.76361	down	Adam10	a disintegrin and metallopeptidase domain 10
1452681_at	2.35751	down	Dtymk	deoxythymidylate kinase
1428163_at	3.23122	down	Sar1b	SAR1 gene homolog B (S. cerevisiae)
1428164_at	2.69535	down	Nudt9	nudix (nucleoside diphosphate linked moiety X)-type motif 9
1452692_a_at	2.0172	down	Ndufv2	NADH dehydrogenase (ubiquinone) flavoprotein 2
1428212_x_at	2.4767	down	EG665562 /// EG667682 /// ENSMUSG00000066956 /// LOC638399 /// LOC673582 /// LOC675018 /// Rpl31	predicted gene
1428213_at	2.08917	down	Nsmce4a	non-SMC element 4 homolog A (S. cerevisiae)
1428214_at	2.17424	down	Tomm7	translocase of outer mitochondrial membrane 7 homolog (yeast)
1428244_at	2.60426	down	Larp1	La ribonucleoprotein domain family
1460432_a_at	4.5597	down	Eif3e	eukaryotic translation initiation factor 3
1428262_s_at	4.61247	down	Hnrnpa3 /// LOC100045099 /// OTTMUSG00000004599	heterogeneous nuclear ribonucleoprotein A3 /// similar to heterogeneous nuclear ribonucleoprotein A3 /// predicted gene
1428267_at	2.4977	down	Dhx40	DEAH (Asp-Glu-Ala-His) box polypeptide 40
1428277_at	2.44095	down	Otud6b	OTU domain containing 6B
1428283_at	3.01747	down	Cyp2s1	cytochrome P450
1428286_at	2.62956	down	2900097C17Rik	RIKEN cDNA 2900097C17 gene
1428288_at	2.89681	down	2310051E17Rik /// Klf9	RIKEN cDNA 2310051E17 gene /// Kruppel-like factor 9
1428294_at	4.15919	down	Zfp259	zinc finger protein 259
1452730_at	2.17242	down	Rps4y2	ribosomal protein S4
1428306_at	3.02031	down	Ddit4	DNA-damage-inducible transcript 4
1428314_at	2.23975	down	Pcnp	PEST proteolytic signal containing nuclear protein
1428315_at	2.40478	down	Ebna1bp2	EBNA1 binding protein 2
1428388_at	3.51538	down	Tnks2	tankyrase
1428389_s_at	4.52146	down	Wdr43	WD repeat domain 43
1428467_at	5.42317	down	Tardbp	TAR DNA binding protein
1428475_at	2.29406	down	Llph	LLP homolog
1432416_a_at	4.63012	down	Npm1	nucleophosmin 1
1428529_at	2.10812	down	2810026P18Rik	RIKEN cDNA 2810026P18 gene
1428530_x_at	2.00343	down	EG629116 /// EG668041 /// LOC677113 /// Rps24	predicted gene
1428531_at	3.18637	down	Ints7	integrator complex subunit 7
1452830_s_at	2.04061	down	Cad	carbamoyl-phosphate synthetase 2
1428543_at	2.00088	down	Ppat	phosphoribosyl pyrophosphate amidotransferase
1452831_s_at	5.57721	down	Ppat	phosphoribosyl pyrophosphate amidotransferase
1452838_at	3.22057	down	Ddx10	DEAD (Asp-Glu-Ala-Asp) box polypeptide 10
1452839_at	2.91802	down	Dph5	DPH5 homolog (S. cerevisiae)
1428570_at	2.88959	down	Ccnc	cyclin C
1428586_at	2.87021	down	Tmem41b	transmembrane protein 41B
1428616_at	2.42047	down	LOC100040573 /// Zfp131	similar to putative transcription factor ZNF131 /// zinc finger protein 131
1428648_at	2.23389	down	Cand1	cullin associated and neddylation disassociated 1
1452866_at	2.07065	down	Nars	asparaginyl-tRNA synthetase
1452870_at	2.7226	down	Apaf1	apoptotic peptidase activating factor 1
1428714_at	2.05051	down	Pgrmc2	progesterone receptor membrane component 2
1452895_at	2.07088	down	Fbxo45	F-box protein 45
1428760_at	2.53585	down	Snapc3	small nuclear RNA activating complex
1428761_a_at	2.96989	down	Snapc3	small nuclear RNA activating complex
1428772_at	3.11501	down	Xpot	exportin
1428845_at	2.81218	down	Bclaf1	BCL2-associated transcription factor 1
1428870_at	3.99862	down	Nolc1	nucleolar and coiled-body phosphoprotein 1
1428908_at	2.54058	down	Rbm25	RNA binding motif protein 25
1428982_at	2.21742	down	Atad2b	ATPase family
1433472_x_at	3.58682	down	EG664868 /// OTTMUSG00000009978 /// Rpl38	predicted gene
1452997_at	2.00343	down	6820431F20Rik	RIKEN cDNA 6820431F20 gene
1429054_at	2.5872	down	Mrpl47	mitochondrial ribosomal protein L47
1429063_s_at	2.10409	down	Kif16b	kinesin family member 16B
1429077_x_at	2.20152	down	EG433125 /// ENSMUSG00000058640 /// ENSMUSG00000061115 /// ENSMUSG00000066180 /// ENSMUSG00000066443 /// ENSMUSG00000068397 /// LOC100042767 /// LOC100043646 /// LOC100044606 /// LOC100045641 /// LOC100046290 /// LOC100047019 /// LOC100047314 /// LOC10004	predicted gene
1453016_at	2.97648	down	Hspb11	heat shock protein family B (small)
1453018_at	2.10863	down	Nvl	nuclear VCP-like
1453096_x_at	3.25975	down	EG621100 /// EG622236 /// OTTMUSG00000001643 /// Rpl27	predicted gene
1429328_at	2.53986	down	Nsfl1c	NSFL1 (p97) cofactor (p47)
1429347_at	2.31007	down	Bcl2l14	BCL2-like 14 (apoptosis facilitator)
1429483_at	2.27894	down	Calcoco2	calcium binding and coiled-coil domain 2
1429490_at	2.15261	down	Rif1	Rap1 interacting factor 1 homolog (yeast)
1453198_at	2.30961	down	100043468	predicted gene
1429623_at	4.40244	down	Zfp644	zinc finger protein 644
1419984_s_at	3.50453	down	Zfp644	zinc finger protein 644
1453223_s_at	2.22679	down	Dppa2	developmental pluripotency associated 2
1429707_at	2.40821	down	Plaa	phospholipase A2
1429709_at	2.9538	down	Pmpcb	peptidase (mitochondrial processing) beta
1429723_at	2.76403	down	6330409N04Rik	RIKEN cDNA 6330409N04 gene
1429763_at	2.101	down	Cnih4	cornichon homolog 4 (Drosophila)
1429777_at	2.07992	down	Dnajb6	DnaJ (Hsp40) homolog
1429982_at	3.80984	down	Rimklb	ribosomal modification protein rimK-like family member B
1430019_a_at	3.48029	down	EG434858 /// Hnrnpa1 /// XM_001481145	predicted gene
1435446_a_at	3.06227	down	Chpt1	choline phosphotransferase 1
1430124_x_at	2.11581	down	Akr1a4	aldo-keto reductase family 1
1430125_s_at	3.49824	down	Pqlc1	PQ loop repeat containing 1
1430271_x_at	2.25464	down	Taf1d	TATA box binding protein (Tbp)-associated factor
1453467_s_at	3.0161	down	Rps15a	ribosomal protein S15a
1430542_a_at	2.13572	down	EG433923 /// EG667030 /// Slc25a5	predicted gene
1430798_x_at	2.8366	down	Mrpl15	mitochondrial ribosomal protein L15
1453729_a_at	2.83276	down	Rpl37	ribosomal protein L37
1453752_at	2.23071	down	Rpl17	ribosomal protein L17
1453993_a_at	2.61486	down	Bnip2	BCL2/adenovirus E1B interacting protein 2
1431765_a_at	2.07735	down	EG243642 /// EG546164 /// EG620248 /// EG621842 /// EG622795 /// EG623466 /// EG634678 /// EG666668 /// EG666682 /// EG667216 /// EG667279 /// LOC100043752 /// LOC100048354 /// LOC634916 /// LOC639606 /// OTTMUSG00000002567 /// OTTMUSG00000003370 /// OTTM	predicted gene
1432263_a_at	2.70584	down	Cox7a2l	cytochrome c oxidase subunit VIIa polypeptide 2-like
1432264_x_at	2.19901	down	Cox7a2l	cytochrome c oxidase subunit VIIa polypeptide 2-like
1433447_x_at	3.05344	down	Cct4	chaperonin containing Tcp1
1433467_at	2.81929	down	Slc7a6	solute carrier family 7 (cationic amino acid transporter
1454607_s_at	2.70148	down	Psat1	phosphoserine aminotransferase 1
1437052_s_at	2.3516	down	Slc2a3	solute carrier family 2 (facilitated glucose transporter)
1455898_x_at	2.01661	down	Slc2a3	solute carrier family 2 (facilitated glucose transporter)
1433497_at	2.09574	down	Aqr	aquarius
1454627_a_at	2.47246	down	433941 /// 622707 /// EG666413 /// EG666642 /// ENSMUSG00000074516 /// LOC100044494 /// OTTMUSG00000006886 /// OTTMUSG00000008034 /// OTTMUSG00000014710 /// Rpl29	predicted gene
1433502_s_at	3.21742	down	Tsr1	TSR1
1433509_s_at	4.90455	down	Reep1	receptor accessory protein 1
1433513_x_at	3.24178	down	Ndufa12	NADH dehydrogenase (ubiquinone) 1 alpha subcomplex
1454632_at	2.47146	down	6330442E10Rik	RIKEN cDNA 6330442E10 gene
1433514_at	5.53132	down	Etnk1	ethanolamine kinase 1
1433519_at	5.59274	down	Nucks1	nuclear casein kinase and cyclin-dependent kinase substrate 1
1454635_at	2.5303	down	Fbxl3 /// LOC100044862	F-box and leucine-rich repeat protein 3 /// similar to Fbxl3 protein
1433530_at	3.09457	down	2210411K19Rik	RIKEN cDNA 2210411K19 gene
1454639_x_at	2.05488	down	2210411K19Rik /// Rpl41	RIKEN cDNA 2210411K19 gene /// ribosomal protein L41
1433531_at	2.87438	down	Acsl4	acyl-CoA synthetase long-chain family member 4
1433534_a_at	2.37737	down	Cct2	chaperonin containing Tcp1
1433535_x_at	2.06945	down	Cct2	chaperonin containing Tcp1
1454641_at	6.97234	down	Cggbp1	CGG triplet repeat binding protein 1
1460543_x_at	2.07777	down	100042986 /// OTTMUSG00000015874 /// Rpl37a	predicted gene
1433549_x_at	2.38329	down	Rps21	ribosomal protein S21
1433562_s_at	2.31675	down	Atp5f1	ATP synthase
1460544_at	2.00591	down	Mak10	MAK10 homolog
1433572_a_at	2.99209	down	Fam120a	family with sequence similarity 120
1433576_at	3.39653	down	Mat2a	methionine adenosyltransferase II
1454661_at	2.30943	down	Atp5g3	ATP synthase
1433593_at	2.91275	down	Ypel5	yippee-like 5 (Drosophila)
1433603_at	2.34849	down	Ndufs6	NADH dehydrogenase (ubiquinone) Fe-S protein 6
1433613_at	3.50923	down	Pank3	pantothenate kinase 3
1454663_at	2.10101	down	Eif5	eukaryotic translation initiation factor 5
1433631_at	2.59388	down	Eif5	eukaryotic translation initiation factor 5
1433640_at	2.01462	down	Fubp1	far upstream element (FUSE) binding protein 1
1433654_at	7.45229	down	Mgea5	meningioma expressed antigen 5 (hyaluronidase)
1433669_at	2.79066	down	Akap8	A kinase (PRKA) anchor protein 8
1433683_at	4.91601	down	Rbm35b	RNA binding motif protein 35b
1433688_x_at	2.64088	down	Rpl14	ribosomal protein L14
1433689_s_at	2.24837	down	Rps9	ribosomal protein S9
1460547_a_at	2.6236	down	Hnrnpk	heterogeneous nuclear ribonucleoprotein K
1433704_s_at	2.04915	down	Sec62	SEC62 homolog (S. cerevisiae)
1436924_x_at	2.61384	down	EG665562 /// EG667682 /// EG668850 /// ENSMUSG00000066956 /// Ero1l /// LOC638399 /// LOC673582 /// LOC675018 /// OTTMUSG00000009823 /// Rpl31	predicted gene
1454703_x_at	2.2216	down	Snhg1	small nucleolar RNA host gene (non-protein coding) 1
1433723_s_at	3.96107	down	Serf2	small EDRK-rich factor 2
1433724_at	3.41064	down	D15Ertd621e	DNA segment
1433729_x_at	2.84919	down	Pmpcb	peptidase (mitochondrial processing) beta
1433737_at	2.30723	down	LOC677213 /// Uhmk1	similar to U2AF homology motif (UHM) kinase 1 /// U2AF homology motif (UHM) kinase 1
1454714_x_at	3.4213	down	EG665516 /// EG666036 /// EG668771 /// Phgdh	predicted gene
1454725_at	3.16163	down	Tra2a	transformer 2 alpha homolog (Drosophila)
1433816_at	2.16297	down	Mcart1	mitochondrial carrier triple repeat 1
1454736_at	2.01283	down	Ankrd57	ankyrin repeat domain 57
1433859_at	2.14773	down	Ino80c	INO80 complex subunit C
1460551_at	3.05396	down	LOC100045999 /// Ran	similar to RAN
1433901_at	3.79311	down	Caprin1	cell cycle associated protein 1
1454760_at	2.35731	down	Htatsf1	HIV TAT specific factor 1
1433903_at	3.42433	down	AU021838	expressed sequence AU021838
1433928_a_at	2.76828	down	Rpl13a	ribosomal protein L13a
1454793_x_at	2.31865	down	Ddx5	DEAD (Asp-Glu-Ala-Asp) box polypeptide 5
1434003_a_at	2.52942	down	Dhps	deoxyhypusine synthase
1434025_at	5.77793	down
1454805_at	4.93644	down	Wtap	Wilms' tumour 1-associating protein
1434037_s_at	2.361	down	Kat2b	K(lysine) acetyltransferase 2B
1434053_x_at	2.70608	down	Atp5k	ATP synthase
1454813_at	2.06866	down	Ccdc72	coiled-coil domain containing 72
1454814_s_at	2.43323	down	AU021838	expressed sequence AU021838
1454817_at	2.67125	down	Utp18	UTP18
1434113_a_at	2.98731	down	Rexo4	REX4
1434114_at	2.02659	down	Rexo4	REX4
1434215_at	2.55913	down	B230308N11Rik	RIKEN cDNA B230308N11 gene
1454887_at	2.12961	down	Pak2	p21 (CDKN1A)-activated kinase 2
1434256_s_at	2.14786	down	Cds2	CDP-diacylglycerol synthase (phosphatidate cytidylyltransferase) 2
1434272_at	2.94486	down	Cpeb2	cytoplasmic polyadenylation element binding protein 2
1434278_at	3.82661	down	Mtm1	X-linked myotubular myopathy gene 1
1454914_at	2.82401	down	2610101N10Rik	RIKEN cDNA 2610101N10 gene
1434320_at	2.25993	down	Gtf3c4	general transcription factor IIIC
1434356_a_at	2.97453	down	Psma5	proteasome (prosome
1434390_at	2.04154	down	Hnrnpu	Mus musculus
1434419_s_at	2.73202	down	Tardbp	TAR DNA binding protein
1434435_s_at	3.3133	down	Cox17	cytochrome c oxidase
1454955_at	2.47944	down	Ipo7	importin 7
1434437_x_at	2.22406	down	Rrm2	ribonucleotide reductase M2
1434471_at	2.32624	down	BC003331	cDNA sequence BC003331
1434491_a_at	2.64733	down	Cox6c	cytochrome c oxidase
1434503_s_at	4.84162	down	Lamp2	lysosomal-associated membrane protein 2
1454993_a_at	15.1529	down	Sfrs3	splicing factor
1434512_x_at	7.97695	down	EG632248 /// Sfrs3	predicted gene
1434523_x_at	3.8848	down	Eif3e	eukaryotic translation initiation factor 3
1455002_at	2.22534	down	Ptp4a1	protein tyrosine phosphatase 4a1
1434552_at	2.7987	down	Wdr77	WD repeat domain 77
1434553_at	3.07947	down	Tmem56	transmembrane protein 56
1455013_at	2.49846	down	Arih2	ariadne homolog 2 (Drosophila)
1434586_a_at	2.35166	down	Ptdss2	phosphatidylserine synthase 2
1434604_at	2.02978	down	Eif5b	eukaryotic translation initiation factor 5B
1434608_at	2.3237	down	Ddx52	DEAD (Asp-Glu-Ala-Asp) box polypeptide 52
1434620_s_at	2.36472	down	Fam13b	family with sequence similarity 13
1455036_s_at	2.24756	down	LOC675851 /// Ndufc2	similar to NADH dehydrogenase (ubiquinone) 1
1434681_at	2.05825	down	4932441K18Rik	RIKEN cDNA 4932441K18 gene
1434690_at	2.02244	down	Lclat1	lysocardiolipin acyltransferase 1
1455065_x_at	2.95344	down	Gnpda1	glucosamine-6-phosphate deaminase 1
1434695_at	2.53206	down	Dtl	denticleless homolog (Drosophila)
1434801_x_at	2.19537	down	Slc25a5	solute carrier family 25 (mitochondrial carrier
1434803_a_at	2.33699	down	Sycn	syncollin
1434854_a_at	2.4125	down	Rps10	ribosomal protein S10
1434859_at	6.84412	down	Umps	uridine monophosphate synthetase
1434896_at	2.2018	down	Zfp422-rs1	zinc finger protein 422
1449699_s_at	2.26108	down	C330027C09Rik	RIKEN cDNA C330027C09 gene
1455141_at	3.29472	down	Tnrc6a	trinucleotide repeat containing 6a
1434901_at	2.11411	down	Zbtb2	zinc finger and BTB domain containing 2
1434941_s_at	3.32892	down	Esf1	ESF1
1434971_x_at	3.17783	down	Mrpl15	mitochondrial ribosomal protein L15
1434976_x_at	2.51962	down	Eif4ebp1	eukaryotic translation initiation factor 4E binding protein 1
1434999_at	2.02015	down	Suv420h1	suppressor of variegation 4-20 homolog 1 (Drosophila)
1435030_at	2.19173	down	Upf2	UPF2 regulator of nonsense transcripts homolog (yeast)
1435035_at	6.01291	down	Rg9mtd2	RNA (guanine-9-) methyltransferase domain containing 2
1455195_at	2.51881	down	EG383815 /// EG547267 /// EG668041 /// LOC677113 /// Rps24	predicted gene
1435194_at	4.05691	down	Hspa4	heat shock protein 4
1460581_a_at	2.13481	down	EG280047 /// EG668182 /// ENSMUSG00000059776 /// LOC674921 /// LOC675192 /// OTTMUSG00000009186 /// OTTMUSG00000025606 /// Rpl13	predicted gene
1435232_x_at	3.0094	down	Mrpl15	mitochondrial ribosomal protein L15
1435277_x_at	2.14906	down	LOC100046344 /// LOC100047753 /// Nme1	similar to Nucleoside diphosphate kinase A (NDK A) (NDP kinase A) (Tumor metastatic process-associated protein) (Metastasis inhibition factor NM23) (NDPK-A) (nm23-M1) /// similar to Nucleoside diphosphate kinase A (NDK A) (NDP kinase A) (Tumor metastatic
1435327_at	3.75528	down	Lpgat1	lysophosphatidylglycerol acyltransferase 1
1455286_at	2.77811	down	Btbd1	BTB (POZ) domain containing 1
1435335_a_at	3.30472	down	Gnptab	N-acetylglucosamine-1-phosphate transferase
1435368_a_at	2.87247	down	Parp1	poly (ADP-ribose) polymerase family
1435376_at	2.07264	down	Ddhd2	DDHD domain containing 2
1455348_x_at	2.61824	down	433941 /// 622707 /// EG666642 /// ENSMUSG00000074516 /// LOC100044494 /// OTTMUSG00000014710 /// Rpl29	predicted gene
1455364_a_at	2.3885	down	EG640050 /// Rps7	predicted gene
1435655_at	2.81755	down	Rpl12	ribosomal protein L12
1435660_at	2.23413	down	LOC664787	similar to Sp110 nuclear body protein
1435666_at	2.03965	down	Mast3	microtubule associated serine/threonine kinase 3
1435757_a_at	2.14085	down	Uqcrc2	ubiquinol cytochrome c reductase core protein 2
1435768_at	3.28861	down	Arid4b	AT rich interactive domain 4B (RBP1-like)
1435791_x_at	2.51581	down	ENSMUSG00000066475 /// ENSMUSG00000067748 /// ENSMUSG00000070510 /// LOC100041933 /// LOC100045527 /// LOC100046300 /// LOC100047874 /// Rpl17	predicted gene
1435817_x_at	2.3633	down	EG216036 /// EG624159 /// EG667717 /// EG668387 /// LOC100043734 /// LOC236932 /// LOC623245 /// LOC639593 /// LOC675985 /// OTTMUSG00000000379 /// OTTMUSG00000005704 /// OTTMUSG00000013244 /// OTTMUSG00000015767 /// Rps6	predicted gene
1455470_x_at	3.23035	down	Lasp1	LIM and SH3 protein 1
1435859_x_at	2.06356	down	Psmc2	proteasome (prosome
1455488_at	2.71909	down	6230416J20Rik	RIKEN cDNA 6230416J20 gene
1455517_at	2.19848	down	Rbm4	RNA binding motif protein 4
1435995_at	2.30315	down	Mrpl22	mitochondrial ribosomal protein L22
1436000_a_at	3.11784	down	Skp2	S-phase kinase-associated protein 2 (p45)
1436064_x_at	2.08882	down	EG629116 /// LOC677113 /// Rps24	predicted gene
1455572_x_at	3.31061	down	LOC100042388 /// LOC100047329 /// LOC100047828 /// OTTMUSG00000000655 /// Rps18	similar to ribosomal protein S18 /// similar to ribosomal protein S18 /// similar to ribosomal protein /// predicted gene
1436152_a_at	10.0529	down	Hbxip	hepatitis B virus x interacting protein
1436222_at	2.73017	down	Gas5	growth arrest specific 5
1436226_at	7.87251	down	LOC100045866 /// Tceb1	similar to elongation factor SIII p15 subunit /// transcription elongation factor B (SIII)
1436234_at	2.47199	down	4732471D19Rik	RIKEN cDNA 4732471D19 gene
1436235_x_at	2.01065	down	4732471D19Rik	RIKEN cDNA 4732471D19 gene
1436298_x_at	2.66141	down	Paics	phosphoribosylaminoimidazole carboxylase
1436506_a_at	3.85781	down	Snhg6	small nucleolar RNA host gene (non-protein coding) 6
1436684_a_at	4.26152	down	Riok2	RIO kinase 2 (yeast)
1436688_x_at	2.4956	down	Rpl14	ribosomal protein L14
1456438_x_at	2.15558	down	Rpn1	ribophorin I
1436699_x_at	2.42411	down	LOC100048449 /// Rpl18	similar to ribosomal protein L18 /// ribosomal protein L18
1436704_x_at	2.80965	down	Mthfd1	methylenetetrahydrofolate dehydrogenase (NADP+ dependent)
1455789_x_at	2.65365	down	Hspa8	heat shock protein 8
1436708_x_at	3.02042	down	Mcm4	minichromosome maintenance deficient 4 homolog (S. cerevisiae)
1436722_a_at	2.03745	down	Actb	actin
1455806_x_at	3.7128	down	Ndufa12	NADH dehydrogenase (ubiquinone) 1 alpha subcomplex
1436816_at	2.77461	down	Nup133	nucleoporin 133
1436822_x_at	2.49363	down	100043273 /// EG620155 /// ENSMUSG00000066475 /// ENSMUSG00000067748 /// ENSMUSG00000069392 /// ENSMUSG00000072489 /// Hk1 /// LOC100045527 /// LOC100048040 /// Rpl17	predicted gene
1436874_x_at	2.34402	down	Slc25a5	solute carrier family 25 (mitochondrial carrier
1436921_at	2.9648	down	Atp7a	ATPase
1436922_at	3.67189	down	Ppil5	peptidylprolyl isomerase (cyclophilin) like 5
1436936_s_at	2.35935	down	Xist	inactive X specific transcripts
1436947_a_at	2.17177	down	Txnl1	thioredoxin-like 1
1436953_at	2.81173	down	Wipf1	WAS/WASL interacting protein family
1436995_a_at	2.94753	down	Rpl26	ribosomal protein L26
1437004_at	2.06775	down	EG547109	predicted gene
1437005_a_at	2.10153	down	Rpl18	ribosomal protein L18
1437009_a_at	3.55073	down	Rnf115	ring finger protein 115
1437029_at	2.20987	down	Tacr3	tachykinin receptor 3
1437033_a_at	2.22435	down	Skp2	S-phase kinase-associated protein 2 (p45)
1455901_at	2.54363	down	Chpt1	choline phosphotransferase 1
1455904_at	10.353	down	Gas5 /// Snord47	growth arrest specific 5 /// small nucleolar RNA
1437074_at	2.48029	down	Snx5	sorting nexin 5
1456055_x_at	2.44798	down	Pold1	polymerase (DNA directed)
1438945_x_at	12.9521	down	Gja1	gap junction protein
1437111_at	3.06457	down	Zc3h12c	zinc finger CCCH type containing 12C
1437131_x_at	2.41261	down	Mrpl11	mitochondrial ribosomal protein L11
1437198_at	2.81709	down	Lig3	ligase III
1437203_at	5.70354	down	Cbll1	Casitas B-lineage lymphoma-like 1
1455972_x_at	3.7188	down	Hadh	hydroxyacyl-Coenzyme A dehydrogenase
1437226_x_at	2.05568	down	Marcksl1	MARCKS-like 1
1437236_a_at	2.36588	down	Zfp110	zinc finger protein 110
1437237_x_at	3.05206	down	Zfp110	zinc finger protein 110
1437246_x_at	2.27151	down	EG216036 /// EG624159 /// EG668387 /// LOC100043734 /// LOC236932 /// LOC623245 /// LOC639593 /// LOC675985 /// OTTMUSG00000000379 /// OTTMUSG00000005704 /// OTTMUSG00000013244 /// OTTMUSG00000015767 /// Rps6	predicted gene
1437267_x_at	2.68633	down	Hnrnph1	Heterogeneous nuclear ribonucleoprotein H1 (Hnrnph1)
1455997_a_at	2.7566	down	100040778 /// Uqcrb	predicted gene
1460621_x_at	2.07709	down	Ywhaq	tyrosine 3-monooxygenase/tryptophan 5-monooxygenase activation protein
1456014_s_at	3.41703	down	Fermt3	fermitin family homolog 3 (Drosophila)
1456036_x_at	2.09461	down	Gsto1	glutathione S-transferase omega 1
1437391_x_at	2.62459	down	Mrpl44	mitochondrial ribosomal protein L44
1437402_x_at	2.23971	down	Tmem41b	transmembrane protein 41B
1437413_x_at	2.2199	down	OTTMUSG00000016246 /// Rps29	predicted gene
1437490_x_at	5.0451	down	LOC640502 /// Uap1	similar to UDP-N-acetylhexosamine pyrophosphorylase /// UDP-N-acetylglucosamine pyrophosphorylase 1
1437502_x_at	2.15992	down	Cd24a /// EG621324	CD24a antigen /// predicted gene
1456079_x_at	2.12099	down	Apex1	apurinic/apyrimidinic endonuclease 1
1437533_at	3.39861	down	Xiap	X-linked inhibitor of apoptosis
1437534_at	3.11811	down
1437565_a_at	2.25515	down	Gnl2 /// LOC633966	guanine nucleotide binding protein-like 2 (nucleolar) /// similar to guanine nucleotide binding protein-like 2 (nucleolar)
1437608_x_at	2.19863	down	Ywhaq	tyrosine 3-monooxygenase/tryptophan 5-monooxygenase activation protein
1456107_x_at	3.08926	down	Eftud2	elongation factor Tu GTP binding domain containing 2
1437621_x_at	3.43621	down	EG665516 /// EG666036 /// EG668771 /// Phgdh	predicted gene
1456112_at	2.2371	down	LOC100043998 /// Tpr	similar to nuclear pore complex-associated intranuclear coiled-coil protein TPR /// translocated promoter region
1456117_at	2.30617	down	Rrp1b	ribosomal RNA processing 1 homolog B (S. cerevisiae)
1437687_x_at	4.39336	down	Fkbp9	FK506 binding protein 9
1437688_x_at	3.56189	down	Atp6ap2	ATPase
1437706_x_at	2.01467	down	EG545121 /// Rps14	predicted gene
1437708_x_at	2.84652	down	Vamp3	vesicle-associated membrane protein 3
1437715_x_at	2.02002	down	Apex1	apurinic/apyrimidinic endonuclease 1
1437723_s_at	3.21026	down	Derl1	Der1-like domain family
1460631_at	2.23947	down	Ogt	O-linked N-acetylglucosamine (GlcNAc) transferase (UDP-N-acetylglucosamine:polypeptide-N-acetylglucosaminyl transferase)
1437835_a_at	2.27776	down	0610011L14Rik	RIKEN cDNA 0610011L14 gene
1437852_x_at	2.54559	down	Cpsf3	cleavage and polyadenylation specificity factor 3
1437867_at	12.8457	down
1437874_s_at	2.04548	down	Hexb	hexosaminidase B
1437948_x_at	2.21204	down	Eif3l	eukaryotic translation initiation factor 3
1437975_a_at	2.99663	down	100041163 /// 100042634 /// EG385336 /// EG664936 /// EG666548 /// ENSMUSG00000063556 /// ENSMUSG00000071532 /// LOC100042058 /// LOC100046821 /// Rpl23a	predicted gene
1437984_x_at	3.08732	down	Bat1a	HLA-B-associated transcript 1A
1437992_x_at	15.0254	down	Gja1	gap junction protein
1456244_x_at	3.97776	down	Glrx3	glutaredoxin 3
1456245_x_at	2.34427	down	Vamp3	vesicle-associated membrane protein 3
1456269_at	2.94418	down	Pramel6	preferentially expressed antigen in melanoma like 6
1456270_s_at	2.84586	down	Pramel6	preferentially expressed antigen in melanoma like 6
1438094_x_at	5.39192	down	Ola1	Obg-like ATPase 1
1438097_at	2.69122	down	Rab20	RAB20
1459992_x_at	2.37503	down	Cln8	ceroid-lipofuscinosis
1438117_x_at	2.42437	down	Tmem41b	transmembrane protein 41B
1456293_s_at	4.35004	down	Ccnh	cyclin H
1438161_s_at	4.19538	down	Rfc4	replication factor C (activator 1) 4
1438223_at	4.64076	down
1438360_x_at	4.45836	down	EG383528 /// EG433326 /// Slc25a5	predicted gene
1456373_x_at	2.02836	down	Rps20	ribosomal protein S20
1456390_at	4.45915	down	Ppp2ca	protein phosphatase 2 (formerly 2A)
1438458_a_at	2.3774	down	Sfpq	splicing factor proline/glutamine rich (polypyrimidine tract binding protein associated)
1438459_x_at	2.22612	down	Sfpq	splicing factor proline/glutamine rich (polypyrimidine tract binding protein associated)
1438468_at	2.18702	down	OTTMUSG00000010432 /// Pramel4	predicted gene
1438507_x_at	2.26546	down	Rpl14	ribosomal protein L14
1438626_x_at	2.45375	down	Rpl14	ribosomal protein L14
1438560_x_at	3.08555	down	Cct4	chaperonin containing Tcp1
1438629_x_at	4.8627	down	Grn	granulin
1438630_x_at	2.39904	down	Mat2a	methionine adenosyltransferase II
1438633_x_at	3.83283	down	Lasp1	LIM and SH3 protein 1
1438634_x_at	4.10933	down	Lasp1	LIM and SH3 protein 1
1456471_x_at	2.74877	down	EG385344 /// EG627427 /// EG665516 /// EG666036 /// EG666422 /// EG666875 /// EG668506 /// EG668576 /// EG668771 /// LOC630761 /// LOC630896 /// OTTMUSG00000011498 /// Phgdh	predicted gene
1438650_x_at	8.85387	down	Gja1	gap junction protein
1438653_x_at	2.4193	down	Atxn10	ataxin 10
1438655_a_at	2.53573	down	100043876 /// ENSMUSG00000066116 /// Rpl34	predicted gene
1456493_at	2.71132	down	MGC118608	similar to Sp110 nuclear body protein
1456516_x_at	5.00862	down	LOC640502 /// Uap1	similar to UDP-N-acetylhexosamine pyrophosphorylase /// UDP-N-acetylglucosamine pyrophosphorylase 1
1456521_at	4.86913	down
1438790_x_at	2.34573	down	Tmem41b	transmembrane protein 41B
1438835_a_at	4.6817	down	Eftud2	elongation factor Tu GTP binding domain containing 2
1438843_x_at	2.43511	down	Mtch2	mitochondrial carrier homolog 2 (C. elegans)
1460008_x_at	2.69649	down	EG667682 /// ENSMUSG00000066956 /// Ero1l /// Rpl31	predicted gene
1456542_s_at	4.11622	down	Qrsl1	glutaminyl-tRNA synthase (glutamine-hydrolyzing)-like 1
1456567_x_at	5.17005	down	Grn	granulin
1438922_x_at	3.89184	down	EG383528 /// EG433326 /// Slc25a5	predicted gene
1438931_s_at	2.03134	down	LOC100047324 /// Sesn1	similar to Sesn1 protein /// sestrin 1
1438943_x_at	2.32577	down	Rpn1	ribophorin I
1438951_x_at	2.12908	down	Nup54	nucleoporin 54
1456580_s_at	2.02508	down	Atp5d	ATP synthase
1438957_x_at	3.66912	down	Cds2	CDP-diacylglycerol synthase (phosphatidate cytidylyltransferase) 2
1460010_a_at	2.17934	down	Ptdss2	phosphatidylserine synthase 2
1438976_x_at	2.55477	down	Mat2a	methionine adenosyltransferase II
1438984_x_at	2.52088	down	Psmb4	proteasome (prosome
1438993_a_at	2.18889	down	Atp6v1d	ATPase
1439012_a_at	5.49225	down	Dck	deoxycytidine kinase
1456600_a_at	3.73882	down	Rnf7	ring finger protein 7
1456603_at	5.48714	down	Fam101b	family with sequence similarity 101
1439030_at	2.55153	down	Gmppb	GDP-mannose pyrophosphorylase B
1439032_at	3.60736	down	Cep27	centrosomal protein 27
1439264_x_at	5.25927	down	Lasp1	LIM and SH3 protein 1
1439268_x_at	4.75002	down	Eif3e	eukaryotic translation initiation factor 3
1456702_x_at	2.29871	down	Mat2a	methionine adenosyltransferase II
1439389_s_at	2.2785	down	Myadm	myeloid-associated differentiation marker
1456730_x_at	2.13744	down	Actl6a	actin-like 6A
1439399_a_at	3.7886	down	Snhg1	small nucleolar RNA host gene (non-protein coding) 1
1439415_x_at	2.32461	down	EG546663 /// Rps21	predicted gene
1439439_x_at	2.10913	down	Eef1d	eukaryotic translation elongation factor 1 delta (guanine nucleotide exchange protein)
1439443_x_at	3.39985	down	Tkt	transketolase
1439456_x_at	3.44334	down	Atp6ap2	ATPase
1456748_a_at	2.26817	down	Nipsnap1	4-nitrophenylphosphatase domain and non-neuronal SNAP25-like protein homolog 1 (C. elegans)
1439809_at	3.34942	down	Pramel7	preferentially expressed antigen in melanoma like 7
1439810_s_at	2.5071	down	Pramel7	preferentially expressed antigen in melanoma like 7
1440831_at	3.7536	down	Bach1	BTB and CNC homology 1
1457285_at	2.72895	down	Zfp187	zinc finger protein 187
1457776_at	5.16976	down	D9Ertd720e	DNA segment
1444292_at	3.30591	down
1447977_x_at	2.0181	down	3100002L24Rik /// OTTMUSG00000016609 /// OTTMUSG00000016611	RIKEN cDNA 3100002L24 gene /// predicted gene
1448020_at	2.13528	down	Rap1a	RAS-related protein-1a (Rap1a)
1448022_at	3.30716	down
1459923_at	2.10294	down	Bex6	brain expressed gene 6
1449632_s_at	2.21348	down	Fkbp10	FK506 binding protein 10
1449633_s_at	3.92895	down	Nt5c3l	5'-nucleotidase
1449641_at	2.14812	down	Adk	adenosine kinase
1449686_s_at	2.71228	down	Scp2	sterol carrier protein 2
1419988_at	2.09516	down	Map3k7	mitogen-activated protein kinase kinase kinase 7
1420000_s_at	5.70144	down	Igbp1	immunoglobulin (CD79A) binding protein 1
1420028_s_at	2.10645	down	LOC100045677 /// Mcm3	similar to DNA replication licensing factor MCM3 (DNA polymerase alpha holoenzyme-associated protein P1) (P1-MCM3) /// minichromosome maintenance deficient 3 (S. cerevisiae)
1449706_s_at	2.28881	down	Nr5a2	nuclear receptor subfamily 5
1449710_s_at	2.69126	down	Atp5a1	ATP synthase
1420085_at	2.41961	down	Fgf4	fibroblast growth factor 4
1420086_x_at	2.88018	down	Fgf4	fibroblast growth factor 4
1420088_at	2.30528	down	Nfkbia	nuclear factor of kappa light polypeptide gene enhancer in B-cells inhibitor
1449731_s_at	2.13767	down	Nfkbia	nuclear factor of kappa light polypeptide gene enhancer in B-cells inhibitor
AFFX-BioB-5_at	2.21959	up
AFFX-BioB-M_at	2.37103	up
AFFX-BioB-3_at	2.25806	up
AFFX-BioC-5_at	2.18496	up
AFFX-BioDn-5_at	2.20276	up
AFFX-BioDn-3_at	2.11151	up
AFFX-r2-Ec-bioB-5_at	2.16199	up
AFFX-r2-Ec-bioB-M_at	2.23233	up
AFFX-r2-Ec-bioB-3_at	2.25911	up
AFFX-r2-Ec-bioC-5_at	2.43908	up
AFFX-r2-Ec-bioC-3_at	2.20266	up
AFFX-r2-Ec-bioD-5_at	2.22947	up
AFFX-r2-Ec-bioD-3_at	2.17458	up
1460646_at	2.02126	up	Csnk2a2	casein kinase 2
1415679_at	2.10569	up	OTTMUSG00000006606 /// Psenen	predicted gene
1415684_at	2.34544	up	Atg5	autophagy-related 5 (yeast)
1460655_a_at	2.52088	up	Ubp1	upstream binding protein 1
1415686_at	2.26091	up	Rab14	RAB14
1415749_a_at	2.38694	up	Rragc	Ras-related GTP binding C
1460676_at	2.35613	up	ENSMUSG00000074243 /// Josd1	predicted gene
1415711_at	2.29472	up	Arfgef1	ADP-ribosylation factor guanine nucleotide-exchange factor 1(brefeldin A-inhibited)
1415758_at	2.15386	up	Fryl	furry homolog-like (Drosophila)
1460741_x_at	2.81798	up	D17Wsu92e	DNA segment
1415794_a_at	2.9189	up	LOC100046080 /// Spin1	similar to Spindlin 1 /// spindlin 1
1460164_at	2.64061	up	LOC100046080 /// Spin1	similar to Spindlin 1 /// spindlin 1
1415830_at	2.25416	up	Orc5l	origin recognition complex
1415849_s_at	2.0274	up	Stmn1	stathmin 1
1415864_at	2.5025	up	Bpgm	2
1415865_s_at	3.33598	up	Bpgm	2
1448120_at	2.46873	up	Gdf9	growth differentiation factor 9
1415874_at	2.25421	up	LOC100046643 /// Spry1	similar to sprouty 1 /// sprouty homolog 1 (Drosophila)
1448131_at	2.22135	up	Mfn2	mitofusin 2
1415890_at	2.52322	up	Papss1	3'-phosphoadenosine 5'-phosphosulfate synthase 1
1415926_at	2.05294	up	Nup62	nucleoporin 62
1415936_at	3.85141	up	Bcar3	breast cancer anti-estrogen resistance 3
1415952_at	2.48392	up	Mark2	MAP/microtubule affinity-regulating kinase 2
1419869_s_at	4.33063	up	Hdlbp	high density lipoprotein (HDL) binding protein
1415991_a_at	5.22806	up	Klhdc3	kelch domain containing 3
1448170_at	4.33397	up	Siah2	seven in absentia 2
1448171_at	5.47684	up	Siah2	seven in absentia 2
1416007_at	2.62933	up	Satb1	special AT-rich sequence binding protein 1
1416019_at	3.01761	up	Dr1	down-regulator of transcription 1
1448184_at	2.07798	up	Fkbp1a	FK506 binding protein 1a
1416048_at	3.63111	up	Phc2	polyhomeotic-like 2 (Drosophila)
1460172_at	2.18437	up	5730403B10Rik	RIKEN cDNA 5730403B10 gene
1425419_a_at	2.14351	up	Raf1	v-raf-leukemia viral oncogene 1
1416078_s_at	2.6739	up	Raf1	v-raf-leukemia viral oncogene 1
1448208_at	2.0322	up	Smad1	MAD homolog 1 (Drosophila)
1448218_s_at	2.2616	up	Ywhaz	tyrosine 3-monooxygenase/tryptophan 5-monooxygenase activation protein
1416102_at	2.08474	up	Ywhaz	tyrosine 3-monooxygenase/tryptophan 5-monooxygenase activation protein
1416125_at	2.40901	up	Fkbp5	FK506 binding protein 5
1416129_at	2.51475	up	Errfi1	ERBB receptor feedback inhibitor 1
1439364_a_at	5.58042	up	Mmp2	matrix metallopeptidase 2
1416136_at	3.45553	up	Mmp2	matrix metallopeptidase 2
1416148_at	3.09711	up	Laptm4b	lysosomal-associated protein transmembrane 4B
1416183_a_at	2.2247	up	Ldhb	lactate dehydrogenase B
1448237_x_at	2.59294	up	Ldhb	lactate dehydrogenase B
1448238_at	2.39118	up	2700060E02Rik	RIKEN cDNA 2700060E02 gene
1416185_a_at	3.90897	up	Adh5	alcohol dehydrogenase 5 (class III)
1448255_a_at	3.21167	up	Surf4	surfeit gene 4
1436797_a_at	2.87791	up	Surf4	surfeit gene 4
1416213_x_at	2.68542	up	Surf4	surfeit gene 4
1449679_s_at	2.47637	up	Stx5a	syntaxin 5A
1448269_a_at	4.43582	up	Klhl13	kelch-like 13 (Drosophila)
1425742_a_at	2.06477	up	Tsc22d1	TSC22 domain family
1416313_at	3.17713	up	Mllt11	myeloid/lymphoid or mixed-lineage leukemia (trithorax homolog
1416315_at	2.66746	up	Abhd4	abhydrolase domain containing 4
1448304_a_at	2.0657	up	Rab6	RAB6
1448308_at	2.17393	up	Ap3m1	adaptor-related protein complex 3
1431422_a_at	2.27869	up	Dusp14	dual specificity phosphatase 14
1448334_a_at	2.22057	up	Ccni	cyclin I
1416434_at	8.5126	up	Bcl2l10	Bcl2-like 10
1448354_at	2.3847	up	G6pdx	glucose-6-phosphate dehydrogenase X-linked
1416476_a_at	3.10275	up	Ube2d2	ubiquitin-conjugating enzyme E2D 2
1416477_at	2.66389	up	ENSMUSG00000037096 /// Ube2d2	predicted gene
1416481_s_at	2.08745	up	Higd1a	HIG1 domain family
1448360_s_at	3.21368	up	Angel2	angel homolog 2 (Drosophila)
1448363_at	3.27382	up	Yap1	yes-associated protein 1
1416525_at	2.11794	up	Spop	speckle-type POZ protein
1416530_a_at	2.51804	up	LOC100045567 /// Pnp1	similar to purine nucleoside phosphorylase /// purine-nucleoside phosphorylase 1
1416542_at	3.89324	up	Phf1	PHD finger protein 1
1416600_a_at	2.20931	up	Rcan1	regulator of calcineurin 1
1416632_at	2.83783	up	LOC677317 /// Me1	similar to NADP-dependent malic enzyme (NADP-ME) (Malic enzyme 1) /// malic enzyme 1
1448411_at	2.31044	up	Wfs1	Wolfram syndrome 1 homolog (human)
1448417_at	2.07313	up	Ninj1	ninjurin 1
1416650_at	2.56908	up	Rfpl4	ret finger protein-like 4
1448420_a_at	2.14997	up	Fbxl12	F-box and leucine-rich repeat protein 12
1416657_at	2.07364	up	Akt1 /// LOC100047666	thymoma viral proto-oncogene 1 /// similar to serine/threonine protein kinase
1448429_at	3.06387	up	Gyg	glycogenin
1448435_at	3.33789	up	Med15	mediator complex subunit 15
1416749_at	2.3805	up	Htra1	HtrA serine peptidase 1
1416767_a_at	4.87433	up	1110003E01Rik	RIKEN cDNA 1110003E01 gene
1416768_at	4.62657	up	1110003E01Rik	RIKEN cDNA 1110003E01 gene
1416842_at	2.29745	up	Gstm5	glutathione S-transferase
1416844_at	2.76361	up	Prmt2	protein arginine N-methyltransferase 2
1416847_s_at	6.8012	up	Oas1d /// Oas1e	2'-5' oligoadenylate synthetase 1D /// 2'-5' oligoadenylate synthetase 1E
1416892_s_at	2.81018	up	Fam107b	family with sequence similarity 107
1416924_at	3.60555	up	Bri3	brain protein I3
1416950_at	2.30158	up	Tnfaip8	tumor necrosis factor
1416982_at	2.10073	up	Foxo1	forkhead box O1
1416983_s_at	2.98595	up	Foxo1	forkhead box O1
1416996_at	3.09998	up	Tbc1d8	TBC1 domain family
1437398_a_at	2.10012	up	Aldh9a1	aldehyde dehydrogenase 9
1454034_a_at	2.10441	up	Usp21	ubiquitin specific peptidase 21
1417065_at	2.06896	up	Egr1	early growth response 1
1417112_at	2.93201	up	Arl2bp	ADP-ribosylation factor-like 2 binding protein
1417129_a_at	4.94777	up	Meis2	Meis homeobox 2
1417134_at	2.13255	up	Srpk2	serine/arginine-rich protein specific kinase 2
1417162_at	3.51753	up	Tmbim1	transmembrane BAX inhibitor motif containing 1
1417169_at	2.97712	up	Usp2	ubiquitin specific peptidase 2
1417175_at	2.73076	up	Csnk1e	casein kinase 1
1417179_at	2.2557	up	Tspan5	tetraspanin 5
1417188_s_at	2.27231	up	Ube2k	ubiquitin-conjugating enzyme E2K (UBC1 homolog
1448611_at	3.20414	up	Wwc2	WW
1417197_at	2.08132	up	Wwc2	WW
1417199_at	2.11639	up	Tmem183a	transmembrane protein 183A
1417226_at	3.01234	up	Fbxw4	F-box and WD-40 domain protein 4
1448634_at	2.3872	up	Ralbp1	ralA binding protein 1
1448651_at	2.34716	up	Nudt5	nudix (nucleoside diphosphate linked moiety X)-type motif 5
1417284_at	2.57483	up	Mapkap1	mitogen-activated protein kinase associated protein 1
1417295_at	2.13688	up	Mta1	metastasis associated 1
1448666_s_at	2.70059	up	Tob2	transducer of ERBB2
1417324_at	3.0393	up	Mast2	microtubule associated serine/threonine kinase 2
1417336_a_at	2.1678	up	Sytl4	synaptotagmin-like 4
1417400_at	2.27111	up	Rai14	retinoic acid induced 14
1417407_at	3.1396	up	Fbxl14	F-box and leucine-rich repeat protein 14
1417426_at	2.17848	up	Srgn	serglycin
1417430_at	2.4886	up	Cdr2	cerebellar degeneration-related 2
1417444_at	2.43459	up	E2f5	E2F transcription factor 5
1460207_s_at	4.27629	up	E2f5	E2F transcription factor 5
1417454_at	2.84527	up	Cul4b	cullin 4B
1417477_at	2.27513	up	Gtlf3b	gene trap locus F3b
1448760_at	2.18007	up	Zfp68	zinc finger protein 68
1448765_at	3.81273	up	Fyn	Fyn proto-oncogene
1417575_at	3.25337	up	Otub2	OTU domain
1417594_at	3.14913	up	Gkap1	G kinase anchoring protein 1
1460211_a_at	2.92993	up	Kdelr1	KDEL (Lys-Asp-Glu-Leu) endoplasmic reticulum protein retention receptor 1
1417627_a_at	2.89711	up	Limk1	LIM-domain containing
1448785_at	2.40871	up	Runx1t1	runt-related transcription factor 1; translocated to
1417667_a_at	2.0104	up	Pter	phosphotriesterase related
1448812_at	2.68229	up	Hpcal1	hippocalcin-like 1
1417719_at	2.28202	up	Sap30	sin3 associated polypeptide
1448830_at	2.49117	up	Dusp1	dual specificity phosphatase 1
1453107_s_at	2.17389	up	4933413G19Rik /// Foxm1 /// Pebp1	RIKEN cDNA 4933413G19 gene /// forkhead box M1 /// phosphatidylethanolamine binding protein 1
1448837_at	3.19788	up	Vil1	villin 1
1448842_at	2.09387	up	Cdo1	cysteine dioxygenase 1
1417774_at	2.04095	up	Nans	N-acetylneuraminic acid synthase (sialic acid synthase)
1417810_a_at	2.02428	up	Kcnb1 /// Pacsin2	potassium voltage gated channel
1417850_at	2.75887	up	Rb1	retinoblastoma 1
1417878_at	2.78685	up	E2f1	E2F transcription factor 1
1417890_at	2.50696	up	Pdxp	pyridoxal (pyridoxine
1417901_a_at	2.58962	up	Ica1	islet cell autoantigen 1
1448892_at	4.36022	up	Dock7	dedicator of cytokinesis 7
1448896_at	2.2472	up	Pigf	phosphatidylinositol glycan anchor biosynthesis
1448910_at	2.19412	up	Pecr	peroxisomal trans-2-enoyl-CoA reductase
1417977_at	2.52449	up	Eif4e3	eukaryotic translation initiation factor 4E member 3
1417978_at	5.08483	up	Eif4e3	eukaryotic translation initiation factor 4E member 3
1448917_at	2.42091	up	Med30	mediator complex subunit 30
1448918_at	2.21961	up	Slco3a1	solute carrier organic anion transporter family
1418030_at	5.39266	up	Slco3a1	solute carrier organic anion transporter family
1418031_at	2.39786	up	Myo9b	myosin IXb
1418057_at	3.06949	up	Tiam1	T-cell lymphoma invasion and metastasis 1
1418078_at	4.84748	up	Psme3	proteaseome (prosome
1418081_at	2.7035	up	Dnajc30	DnaJ (Hsp40) homolog
1418101_a_at	2.66136	up	Rtn3	reticulon 3
1448981_x_at	4.40475	up	Tcl1b1	T-cell leukemia/lymphoma 1B
1418209_a_at	3.19613	up	Pfn2	profilin 2
1418229_s_at	2.57714	up	Nfu1	NFU1 iron-sulfur cluster scaffold homolog (S. cerevisiae)
1449008_at	3.32806	up	Tulp3	tubby-like protein 3
1418258_s_at	2.14912	up	Dynll2	dynein light chain LC8-type 2
1449013_at	2.64364	up	Eef2k	eukaryotic elongation factor-2 kinase
1449016_at	2.45791	up	Zp2	zona pellucida glycoprotein 2
1418294_at	2.10381	up	Epb4.1l4b	erythrocyte protein band 4.1-like 4b
1449040_a_at	3.95042	up	Sephs2	selenophosphate synthetase 2
1449048_s_at	2.95758	up	Rab4a	RAB4A
1418389_at	5.03403	up	2810453I06Rik	RIKEN cDNA 2810453I06 gene
1418447_at	2.27191	up	Golga5	golgi autoantigen
1449084_s_at	3.44145	up	Sh3d19	SH3 domain protein D19
1425745_a_at	3.59317	up	Tacc2	transforming
1418478_at	3.27009	up	Lmo1	LIM domain only 1
1418506_a_at	4.07025	up	Prdx2	peroxiredoxin 2
1418531_at	3.50925	up	Oosp1	oocyte secreted protein 1
1418540_a_at	2.806	up	Ptpre	protein tyrosine phosphatase
1418542_s_at	2.33513	up	Cenpo	centromere protein O
1418594_a_at	2.21183	up	LOC100044566 /// Ncoa1	similar to Nuclear receptor coactivator 1 (NCoA-1) (Steroid receptor coactivator 1) (SRC-1) (Nuclear receptor coactivator protein 1) (mNRC-1) /// nuclear receptor coactivator 1
1418686_at	4.23811	up	Oas1c	2'-5' oligoadenylate synthetase 1C
1418694_at	4.95025	up	Kcmf1	potassium channel modulatory factor 1
1449186_at	3.23742	up	Bag4	BCL2-associated athanogene 4
1449188_at	3.10384	up	Midn	midnolin
1449197_at	2.05454	up	Wdr20a	WD repeat domain 20a
1418743_a_at	2.56924	up	LOC100047138 /// Tesc	similar to Tescalcin /// tescalcin
1418744_s_at	4.60067	up	LOC100047138 /// Tesc	similar to Tescalcin /// tescalcin
1418762_at	3.14359	up	Cd55	CD55 antigen
1433733_a_at	2.23439	up	Cry1	cryptochrome 1 (photolyase-like)
1449244_at	2.21784	up	Cdh2 /// LOC100044363	cadherin 2 /// similar to N-cadherin
1418840_at	2.01728	up	Pdcd4	programmed cell death 4
1418850_at	2.08301	up	Epc1	enhancer of polycomb homolog 1 (Drosophila)
1418865_at	2.04741	up	Zfp385a	zinc finger protein 385A
1418882_at	2.97945	up	Nlrp5	NLR family
1449259_at	2.69139	up	Rab3d	RAB3D
1418890_a_at	2.7455	up	Rab3d	RAB3D
1418894_s_at	2.99225	up	Pbx2	pre B-cell leukemia transcription factor 2
1418932_at	3.25129	up	LOC100046232 /// Nfil3	similar to NFIL3/E4BP4 transcription factor /// nuclear factor
1418956_at	2.0947	up	Tssk6	testis-specific serine kinase 6
1418966_a_at	2.04692	up	Dcbld1	discoidin
1449300_at	2.51067	up	Cttnbp2nl	CTTNBP2 N-terminal like
1449307_at	2.88981	up	Dbndd1	dysbindin (dystrobrevin binding protein 1) domain containing 1
1419027_s_at	2.67671	up	Gltp	glycolipid transfer protein
1419063_at	2.28233	up	Ugt8a	UDP galactosyltransferase 8A
1449343_s_at	2.07275	up	Sin3a	transcriptional regulator
1419102_at	2.2523	up	Sin3a	transcriptional regulator
1419108_at	3.6482	up	Ophn1	oligophrenin 1
1419112_at	2.74664	up	LOC100044468 /// Nlk	similar to nemo-like kinase /// nemo like kinase
1449380_at	2.13175	up	Pacsin1	protein kinase C and casein kinase substrate in neurons 1
1419231_s_at	2.35293	up	Krt12	keratin 12
1419244_a_at	2.75048	up	Rab14	RAB14
1419246_s_at	2.86059	up	Rab14	RAB14
1419248_at	2.47427	up	Rgs2	regulator of G-protein signaling 2
1419253_at	2.26096	up	Mthfd2	methylenetetrahydrofolate dehydrogenase (NAD+ dependent)
1419265_at	2.12695	up	1200014M14Rik	RIKEN cDNA 1200014M14 gene
1419354_at	3.39413	up	Klf7	Kruppel-like factor 7 (ubiquitous)
1419470_at	2.05092	up	Gnb4	guanine nucleotide binding protein (G protein)
1419484_a_at	2.23571	up	Gbas	glioblastoma amplified sequence
1419536_a_at	3.0651	up	Rela	v-rel reticuloendotheliosis viral oncogene homolog A (avian)
1419558_at	2.22389	up	Mdm4	transformed mouse 3T3 cell double minute 4
1419591_at	2.07414	up	Gsdmc1	gasdermin C1
1449523_at	2.5479	up	Bcl7c	B-cell CLL/lymphoma 7C
1420357_s_at	2.29435	up	LOC100044094 /// LOC100044314 /// Xlr3a /// Xlr3b /// Xlr3c	hypothetical protein LOC100044094 /// hypothetical protein LOC100044314 /// X-linked lymphocyte-regulated 3A /// X-linked lymphocyte-regulated 3B /// X-linked lymphocyte-regulated 3C
1419649_s_at	2.3065	up	Myo1c	myosin IC
1449552_at	2.15767	up	Zfr	zinc finger RNA binding protein
1449553_at	2.90361	up	Nkain1	Na+/K+ transporting ATPase interacting 1
1419686_at	2.25482	up	Tsga14	testis specific gene A14
1419700_a_at	2.4862	up	Prom1	prominin 1
1449815_a_at	2.75535	up	Ssbp2	single-stranded DNA binding protein 2
1420362_a_at	2.02578	up	Bik	BCL2-interacting killer
1449876_at	2.03235	up	Prkg1	protein kinase
1420455_at	2.57661	up	Gcm2	glial cells missing homolog 2 (Drosophila)
1420487_at	2.295	up	Nol7	nucleolar protein 7
1420498_a_at	2.63849	up	Dab2	disabled homolog 2 (Drosophila)
1420505_a_at	2.28136	up	Stxbp1	syntaxin binding protein 1
1460275_at	2.39053	up	Gpr3	G-protein coupled receptor 3
1420558_at	2.27295	up	Selp	selectin
1449931_at	2.14963	up	Cpeb4	cytoplasmic polyadenylation element binding protein 4
1420631_a_at	2.19797	up	Blcap	bladder cancer associated protein homolog (human)
1420642_a_at	2.01137	up	Romo1	reactive oxygen species modulator 1
1420649_at	3.03193	up	Zfhx3	zinc finger homeobox 3
1420720_at	2.11332	up	LOC100044234 /// Nptx2	hypothetical protein LOC100044234 /// neuronal pentraxin 2
1420745_a_at	2.31873	up	Ccndbp1	cyclin D-type binding-protein 1
1449976_a_at	2.00925	up	Gpr35	G protein-coupled receptor 35
1420773_at	3.64797	up	Dub1	deubiquitinating enzyme 1
1450024_at	2.45666	up	Sufu	suppressor of fused homolog (Drosophila)
1420851_at	2.72104	up	Pard6g	par-6 partitioning defective 6 homolog gamma (C. elegans)
1420922_at	2.10931	up	Usp9x	ubiquitin specific peptidase 9
1420928_at	3.32754	up	St6gal1	beta galactoside alpha 2
1450186_s_at	2.37736	up	Gnas	GNAS (guanine nucleotide binding protein
1450063_at	2.46502	up	Fmn2 /// LOC100044570	formin 2 /// similar to formin-2
1450064_at	2.05819	up	Fmn2 /// LOC100044570	formin 2 /// similar to formin-2
1450070_s_at	2.63761	up	Pak1	p21 (CDKN1A)-activated kinase 1
1450106_a_at	2.28369	up	Evl /// LOC100047333	Ena-vasodilator stimulated phosphoprotein /// similar to Ena-VASP-like
1421087_at	2.67918	up	Per3	period homolog 3 (Drosophila)
1421103_at	2.00783	up	Bmp2k	BMP2 inducible kinase
1431302_a_at	2.57099	up	Nudt7	nudix (nucleoside diphosphate linked moiety X)-type motif 7
1425231_a_at	2.34411	up	Zfp46	zinc finger protein 46
1421240_at	2.90896	up	Ern1	endoplasmic reticulum (ER) to nucleus signalling 1
1421265_a_at	2.93846	up	Rbm38	RNA binding motif protein 38
1421271_at	2.16271	up	Sh3rf1	SH3 domain containing ring finger 1
1421283_at	2.42748	up	Bmp5	bone morphogenetic protein 5
1450210_at	2.82581	up	Bmp15	bone morphogenetic protein 15
1421399_at	2.55772	up	Insm1	insulinoma-associated 1
1450306_at	2.17769	up	Zp1	zona pellucida glycoprotein 1
1452298_a_at	3.71804	up	Myo5b	myosin Vb
1421720_a_at	2.49523	up	Dtx2	deltex 2 homolog (Drosophila)
1421828_at	2.0464	up	Kpna3	karyopherin (importin) alpha 3
1450386_at	2.60457	up	Kpna3	karyopherin (importin) alpha 3
1421845_at	2.28266	up	Golph3	golgi phosphoprotein 3
1421853_at	2.0308	up	Psen1	presenilin 1
1450402_at	2.09028	up	Med1	mediator complex subunit 1
1421910_at	3.2555	up	Tcf20	transcription factor 20
1421982_a_at	2.19422	up	Unc50	unc-50 homolog (C. elegans)
1422021_at	4.56827	up	Spry4	sprouty homolog 4 (Drosophila)
1450511_at	2.4368	up	Musk	muscle
1422456_at	2.077	up	Nsf	N-ethylmaleimide sensitive fusion protein
1422458_at	4.31452	up	Tcl1	T-cell lymphoma breakpoint 1
1422471_at	2.60833	up	Pex13	peroxisomal biogenesis factor 13
1422510_at	2.39434	up	Ctdspl	CTD (carboxy-terminal domain
1422573_at	3.27818	up	Ampd3	adenosine monophosphate deaminase 3
1450667_a_at	3.60748	up	Cs	citrate synthase
1422578_at	2.94491	up	Cs	citrate synthase
1422607_at	2.35847	up	Etv1	ets variant gene 1
1422610_s_at	2.44512	up	Igf2bp3	insulin-like growth factor 2 mRNA binding protein 3
1450693_at	2.12746	up	Rgs17	regulator of G-protein signaling 17
1422629_s_at	2.35689	up	Shroom3	shroom family member 3
1422637_at	2.78769	up	Rassf5	Ras association (RalGDS/AF-6) domain family member 5
1422638_s_at	5.97326	up	Rassf5	Ras association (RalGDS/AF-6) domain family member 5
1450706_a_at	2.69234	up	Arl3	ADP-ribosylation factor-like 3
1422673_at	2.77397	up	Prkd1	protein kinase D1
1422685_at	2.77346	up	Exoc4	exocyst complex component 4
1422710_a_at	2.61568	up	Cacna1h	calcium channel
1422730_at	2.31523	up	Limd1	LIM domains containing 1
1422736_at	2.08727	up	LOC100045146 /// Ranbp9	similar to B cell antigen receptor Ig beta associated protein 1 /// RAN binding protein 9
1450732_a_at	3.09316	up	Bicd2	bicaudal D homolog 2 (Drosophila)
1460319_at	2.27032	up	Fut8	fucosyltransferase 8
1419827_s_at	3.65575	up	Kif17	kinesin family member 17
1422786_at	3.33652	up	Slc30a1	solute carrier family 30 (zinc transporter)
1450759_at	2.76918	up	Bmp6	bone morphogenetic protein 6
1422823_at	2.10919	up	Eps8 /// LOC632638	epidermal growth factor receptor pathway substrate 8 /// similar to Epidermal growth factor receptor kinase substrate 8
1422925_s_at	2.12532	up	Acot3	acyl-CoA thioesterase 3
1422937_at	2.30293	up	Fzd5	frizzled homolog 5 (Drosophila)
1422992_s_at	2.32207	up	Pik3cd	phosphatidylinositol 3-kinase catalytic delta polypeptide
1423038_at	2.94284	up	Stx6	syntaxin 6
1423053_at	2.50146	up	Arf4	ADP-ribosylation factor 4
1423076_at	2.82892	up	Snx9	sorting nexin 9
1423103_at	3.6279	up	Rfx5	regulatory factor X
1450858_a_at	3.41389	up	Ube2d3	ubiquitin-conjugating enzyme E2D 3 (UBC4/5 homolog
1450898_at	2.54908	up	Hiat1	hippocampus abundant gene transcript 1
1424222_s_at	2.12845	up	Rad23b	RAD23b homolog (S. cerevisiae)
1423228_at	4.73787	up	B4galt6 /// LOC675709	UDP-Gal:betaGlcNAc beta 1
1460329_at	2.20871	up	B4galt6 /// LOC675709	UDP-Gal:betaGlcNAc beta 1
1450916_at	2.35992	up	Stau2	staufen (RNA binding protein) homolog 2 (Drosophila)
1450917_at	2.37645	up	Myom2	myomesin 2
1450922_a_at	4.81579	up	Tgfb2	transforming growth factor
1423250_a_at	2.19189	up	Tgfb2	transforming growth factor
1450923_at	4.09588	up	Tgfb2	transforming growth factor
1423274_at	2.04452	up	Ints6	integrator complex subunit 6
1423284_at	2.05244	up	Mansc1	MANSC domain containing 1
1423319_at	2.22993	up	Hhex	hematopoietically expressed homeobox
1423329_at	2.83305	up	Gdap1	ganglioside-induced differentiation-associated-protein 1
1423393_at	2.28687	up	Clic4	chloride intracellular channel 4 (mitochondrial)
1438115_a_at	3.12015	up	Slc9a3r1	solute carrier family 9 (sodium/hydrogen exchanger)
1438116_x_at	2.96245	up	Slc9a3r1	solute carrier family 9 (sodium/hydrogen exchanger)
1423461_a_at	2.07277	up	Ubl3	ubiquitin-like 3
1451003_at	2.25461	up	Map3k7ip2	mitogen-activated protein kinase kinase kinase 7 interacting protein 2
1423470_at	2.25905	up	Ptbp2	polypyrimidine tract binding protein 2
1423650_at	3.21986	up	Rnf26	ring finger protein 26
1423663_at	2.31879	up	Flcn	folliculin
1455955_s_at	2.23239	up	Snx17	sorting nexin 17
1423682_a_at	2.64	up	Cdca4	cell division cycle associated 4
1423683_at	2.2546	up	Cdca4	cell division cycle associated 4
1423732_at	4.44314	up	Tram1	translocating chain-associating membrane protein 1
1423734_at	2.11577	up	Rac1	RAS-related C3 botulinum substrate 1
1451108_at	2.12268	up	Rnf185	ring finger protein 185
1423785_at	2.05261	up	Egln1	EGL nine homolog 1 (C. elegans)
1423786_at	2.63731	up	8430410A17Rik	RIKEN cDNA 8430410A17 gene
1451141_at	2.21273	up	Mettl8	methyltransferase like 8
1423890_x_at	2.10936	up	Atp1b1	ATPase
1423896_a_at	3.17866	up	Rnf187	ring finger protein 187
1423897_at	2.48085	up	Rnf187	ring finger protein 187
1423901_at	3.6816	up	Trip12	thyroid hormone receptor interactor 12
1423902_s_at	4.11637	up	Arhgef12	Rho guanine nucleotide exchange factor (GEF) 12
1423924_s_at	2.54641	up	Tspan14	tetraspanin 14
1451172_at	3.62617	up	Tprgl	transformation related protein 63 regulated like
1451177_at	3.30251	up	Dnajb4	DnaJ (Hsp40) homolog
1423992_at	2.20259	up	Gatad2a	GATA zinc finger domain containing 2A
1451197_s_at	2.94327	up	Gatad2a	GATA zinc finger domain containing 2A
1424008_a_at	2.96072	up	Rbpms2	RNA binding protein with multiple splicing 2
1424029_at	2.26337	up	Tspyl4	TSPY-like 4
1424030_at	2.34906	up	Grhl1 /// LOC100043996	grainyhead-like 1 (Drosophila) /// similar to Grhl1 protein
1424032_at	2.19537	up	Hvcn1	hydrogen voltage-gated channel 1
1451220_at	2.94951	up	Wdr20a	WD repeat domain 20a
1424072_at	3.48098	up	2010107G23Rik	RIKEN cDNA 2010107G23 gene
1460352_s_at	2.35259	up	Pik3r4	phosphatidylinositol 3 kinase
1424213_at	2.24759	up	Ubiad1	UbiA prenyltransferase domain containing 1
1451292_at	2.75291	up	Zfp212	Zinc finger protein 212
1424275_s_at	5.08421	up	Trim41	tripartite motif-containing 41
1424308_at	2.66964	up	Slc24a3	solute carrier family 24 (sodium/potassium/calcium exchanger)
1451335_at	5.1414	up	Plac8	placenta-specific 8
1424404_at	2.02571	up	0610040J01Rik	RIKEN cDNA 0610040J01 gene
1451379_at	2.07242	up	Rab22a	RAB22A
1424586_at	2.60191	up	Ehbp1	EH domain binding protein 1
1424625_a_at	2.24247	up	Dennd1a	DENN/MADD domain containing 1A
1424631_a_at	2.46105	up	Ighg	Immunoglobulin heavy chain (gamma polypeptide)
1424663_at	4.18989	up	BC017647	cDNA sequence BC017647
1424669_at	2.18022	up	Zfyve21	zinc finger
1424670_s_at	5.36605	up	Zfyve21	zinc finger
1424707_at	2.34872	up	Tmed10	transmembrane emp24-like trafficking protein 10 (yeast)
1431890_a_at	3.20981	up	Mllt3	myeloid/lymphoid or mixed-lineage leukemia (trithorax homolog
1451490_at	2.02309	up	Lyplal1	lysophospholipase-like 1
1424839_a_at	4.12352	up	Nsun4	NOL1/NOP2/Sun domain family
1424844_at	3.12818	up	Angel1	angel homolog 1 (Drosophila)
1451510_s_at	4.43563	up	Olah	oleoyl-ACP hydrolase
1424863_a_at	2.01087	up	Hipk2	homeodomain interacting protein kinase 2
1424864_at	2.36695	up	Hipk2	homeodomain interacting protein kinase 2
1424932_at	4.51005	up	Egfr	epidermal growth factor receptor
1454045_a_at	2.10753	up	Pgs1	phosphatidylglycerophosphate synthase 1
1454046_x_at	2.24695	up	Pgs1	phosphatidylglycerophosphate synthase 1
1424949_at	3.12079	up	Huwe1	HECT
1451545_at	2.73905	up	Tdrd3	tudor domain containing 3
1424989_at	3.02737	up	Orai1	ORAI calcium release-activated calcium modulator 1
1451570_a_at	2.01721	up	Fam92a	family with sequence similarity 92
1425023_at	2.70438	up	Usp3	ubiquitin specific peptidase 3
1451572_a_at	3.57883	up	Mff	mitochondrial fission factor
1425066_a_at	3.76971	up	Mtmr14	myotubularin related protein 14
1451586_at	3.47126	up	Tmbim6	transmembrane BAX inhibitor motif containing 6
1425108_a_at	6.59185	up	BC004728	cDNA sequence BC004728
1451592_at	2.01005	up	P42pop	Myb protein P42POP
1425185_at	3.61663	up	Fam152a	family with sequence similarity 152
1425220_x_at	3.14779	up	LOC100038935	hypothetical protein LOC100038935
1451645_at	2.07776	up	Fbrs	fibrosin
1425296_a_at	2.05017	up	Rgs3	regulator of G-protein signaling 3
1425427_at	2.48821	up	LOC639910	hypothetical protein LOC639910
1425460_at	2.7552	up	Mtmr2	myotubularin related protein 2
1451723_at	4.10604	up	Cnot6l	CCR4-NOT transcription complex
1425480_at	3.14116	up	Cnot6l	CCR4-NOT transcription complex
1425481_at	3.60297	up	Cnot6l	CCR4-NOT transcription complex
1451737_at	2.01949	up	Pik3r1	phosphatidylinositol 3-kinase
1451740_at	2.37638	up	Paip1	polyadenylate binding protein-interacting protein 1
1425542_a_at	3.33525	up	Ppp2r5c	protein phosphatase 2
1451804_a_at	4.02098	up	Lrrc16a	leucine rich repeat containing 16A
1425759_at	2.10612	up	Nobox	NOBOX oogenesis homeobox
1451852_at	2.80017	up	Tcstv3	2-cell-stage
1430526_a_at	3.68469	up	Smarca2	SWI/SNF related
1451893_s_at	2.68881	up	Magi1	membrane associated guanylate kinase
1426207_at	2.03657	up	Ikbkb	inhibitor of kappaB kinase beta
1426223_at	2.02356	up	Ttc39c	tetratricopeptide repeat domain 39C
1426226_at	2.36171	up	Dyrk1a	dual-specificity tyrosine-(Y)-phosphorylation regulated kinase 1a
1451982_at	3.10327	up	Map2k4	mitogen-activated protein kinase kinase 4
1426241_a_at	3.74658	up	Scmh1	sex comb on midleg homolog 1
1426245_s_at	2.52762	up	Mapre2	microtubule-associated protein
1451989_a_at	3.84476	up	Mapre2	microtubule-associated protein
1426275_a_at	2.03909	up	Uxs1	UDP-glucuronate decarboxylase 1
1426342_at	2.17526	up	Stt3b	STT3
1452050_at	2.19325	up	Camk1d	calcium/calmodulin-dependent protein kinase ID
1452055_at	2.28695	up	Ctdsp1 /// LOC100047249	CTD (carboxy-terminal domain
1452069_a_at	2.03483	up	Thap7	THAP domain containing 7
1426462_at	4.40015	up	Gphn	gephyrin
1426463_at	2.20476	up	Gphn	gephyrin
1426465_at	2.84316	up	Dlgap4	discs
1426515_a_at	2.1645	up	Tor1a	torsin family 1
1426520_at	3.34941	up	Btg4	B-cell translocation gene 4
1426525_at	2.1267	up	1700124K17Rik /// Arid2	RIKEN cDNA 1700124K17 gene /// AT rich interactive domain 2 (ARID
1460393_a_at	2.50552	up	Dusp7	dual specificity phosphatase 7
1426564_at	2.15439	up	Zfp553	zinc finger protein 553
1426580_at	2.4716	up	Plk4	polo-like kinase 4 (Drosophila)
1430388_a_at	2.2431	up	Sulf2	sulfatase 2
1426599_a_at	2.8485	up	Slc2a1	solute carrier family 2 (facilitated glucose transporter)
1436188_a_at	3.01951	up	Ndrg4	N-myc downstream regulated gene 4
1426615_s_at	3.56201	up	Ndrg4	N-myc downstream regulated gene 4
1426655_a_at	2.85492	up	Fam63a	family with sequence similarity 63
1426656_at	3.18054	up	Fam63a	family with sequence similarity 63
1426663_s_at	2.55684	up	Slc45a3	solute carrier family 45
1426664_x_at	2.4916	up	Slc45a3	solute carrier family 45
1426678_at	2.74277	up	Zfp706	zinc finger protein 706
1452150_at	2.35876	up	AU040320	expressed sequence AU040320
1426700_a_at	2.71835	up	Usp52	ubiquitin specific peptidase 52
1452153_at	2.16703	up	Fbxo18	F-box protein 18
1426708_at	3.69164	up	Antxr2	anthrax toxin receptor 2
1426774_at	3.41229	up	Parp12	poly (ADP-ribose) polymerase family
1426782_at	2.68615	up	Gpr125	G protein-coupled receptor 125
1426787_at	3.00214	up	Sfi1	Sfi1 homolog
1426799_at	2.74552	up	Rab8b	RAB8B
1452209_at	2.08992	up	Pkp4	plakophilin 4
1460398_at	2.71647	up	Phf8	PHD finger protein 8
1426825_at	3.52696	up	Fmnl3	formin-like 3
1426828_at	2.87278	up	1300018I17Rik	RIKEN cDNA 1300018I17 gene
1426861_at	2.30354	up	Aftph	aftiphilin
1452222_at	2.34008	up	Utrn	utrophin
1426960_a_at	2.26509	up	Fa2h	fatty acid 2-hydroxylase
1427003_at	2.13705	up	Ppp2r5c	protein phosphatase 2
1452280_at	2.21873	up	Farp1	FERM
1427012_at	2.34061	up	Lancl1	LanC (bacterial lantibiotic synthetase component C)-like 1
1427013_at	2.23716	up	Car9	carbonic anhydrase 9
1427060_at	2.98726	up	Mapk3	mitogen-activated protein kinase 3
1427066_a_at	2.17802	up	4933439F18Rik	RIKEN cDNA 4933439F18 gene
1427067_at	2.66531	up	4933439F18Rik	RIKEN cDNA 4933439F18 gene
1427068_x_at	3.07809	up	4933439F18Rik	RIKEN cDNA 4933439F18 gene
1427091_at	2.19884	up	Znfx1	zinc finger
1427105_at	2.2535	up	Cenpn	centromere protein N
1452305_s_at	2.05065	up	Cenpn	centromere protein N
1452327_at	2.02231	up	Iqsec1	IQ motif and Sec7 domain 1
1427177_at	2.02313	up	Fyco1	FYVE and coiled-coil domain containing 1
1427225_at	2.37403	up	Epn2	epsin 2
1427226_at	3.51509	up	Epn2	epsin 2
1452359_at	3.73303	up	Rell1	RELT-like 1
1427243_at	2.48429	up	Rell1	RELT-like 1
1427250_at	2.23944	up	Atp2a2	ATPase
1452364_at	2.38197	up	Suz12	suppressor of zeste 12 homolog (Drosophila)
1427253_s_at	2.19916	up	Suz12	suppressor of zeste 12 homolog (Drosophila)
1427274_at	2.12582	up	Rnf214	ring finger protein 214
1427293_a_at	5.65514	up	Auts2	autism susceptibility candidate 2
1427300_at	4.99816	up	Lhx8	LIM homeobox protein 8
1427312_at	2.87076	up	Cmya5	cardiomyopathy associated 5
1452396_at	2.19413	up	Sfrs15	splicing factor
1427333_s_at	2.56682	up	Sfrs15	splicing factor
1452398_at	2.26776	up	Plce1	phospholipase C
1427347_s_at	3.50415	up	Tubb2a	tubulin
1452413_at	3.23517	up	C230081A13Rik	RIKEN cDNA C230081A13 gene
1427400_at	2.89675	up	Lbx1	ladybird homeobox homolog 1 (Drosophila)
1427416_x_at	5.27907	up	Dusp7	dual specificity phosphatase 7
1427879_at	2.40768	up	1810031K17Rik	RIKEN cDNA 1810031K17 gene
1452583_s_at	2.86941	up	Galm	galactose mutarotase
1427917_s_at	2.42538	up	Ssbp3	single-stranded DNA binding protein 3
1427994_at	2.70488	up	Cd300lf /// LOC100047115	CD300 antigen like family member F /// similar to CD300 antigen like family member F
1452634_at	4.35376	up	Obox3	oocyte specific homeobox 3
1428062_at	2.57896	up	Cpa1	carboxypeptidase A1
1452664_a_at	2.57745	up	Tm7sf3	transmembrane 7 superfamily member 3
1428101_at	2.70008	up	Rnf38	ring finger protein 38
1452666_a_at	3.90471	up	Tmcc2	transmembrane and coiled-coil domains 2
1428108_x_at	3.14124	up	Tmcc2	transmembrane and coiled-coil domains 2
1452669_at	2.95687	up	Fam53c	family with sequence similarity 53
1428122_s_at	2.19633	up	Fam125b	family with sequence similarity 125
1452679_at	2.74997	up	Tubb2b	tubulin
1428189_at	2.69352	up	5730494M16Rik	RIKEN cDNA 5730494M16 gene
1428196_a_at	2.03479	up	Fam82a2	family with sequence similarity 82
1428280_at	2.47797	up	Fip1l1	FIP1 like 1 (S. cerevisiae)
1428327_at	3.14793	up	Trak1	trafficking protein
1428346_at	2.14902	up	Trafd1	TRAF type zinc finger domain containing 1
1428357_at	2.10955	up	2610019F03Rik	RIKEN cDNA 2610019F03 gene
1452769_at	2.3055	up	Rnf145	ring finger protein 145
1452773_at	2.50181	up	5730494N06Rik	RIKEN cDNA 5730494N06 gene
1428401_at	2.69663	up	Zcchc3	zinc finger
1452843_at	2.73369	up	Il6st	interleukin 6 signal transducer
1428706_at	2.21587	up	Cenpv	centromere protein V
1428789_at	2.37833	up	Ralgps2	CDNA clone IMAGE:6828107
1428871_at	2.36066	up	LOC100047441 /// Msl1	similar to RIKEN cDNA 4121402D02 gene /// male-specific lethal 1 homolog (Drosophila)
1428904_at	2.05445	up	Ammecr1l	AMME chromosomal region gene 1-like
1453004_at	2.58416	up	Slc22a23	solute carrier family 22
1435695_a_at	2.93314	up	Ggct	gamma-glutamyl cyclotransferase
1453025_at	2.02642	up	Macrod2	MACRO domain containing 2
1432431_s_at	3.36623	up	Macrod2	MACRO domain containing 2
1429270_a_at	2.83902	up	Syce2	synaptonemal complex central element protein 2
1453090_x_at	2.7937	up	LOC666466 /// Obox1 /// Obox2	similar to OBOX2 /// oocyte specific homeobox 1 /// oocyte specific homeobox 2
1453281_at	3.31368	up	Pik3cd	phosphatidylinositol 3-kinase catalytic delta polypeptide
1453571_at	2.1603	up	Depdc6	DEP domain containing 6
1430979_a_at	3.84558	up	Prdx2	peroxiredoxin 2
1453848_s_at	9.4203	up	Zbed3	zinc finger
1431805_a_at	2.67112	up	Rhpn2	rhophilin
1433471_at	4.04291	up	Tcf7	transcription factor 7
1454613_at	4.20026	up
1433478_at	2.22507	up	Parl	presenilin associated
1454618_at	5.11595	up	C86187	expressed sequence C86187
1433483_s_at	6.50997	up	C86187	expressed sequence C86187
1433516_a_at	2.88555	up	Myeov2	myeloma overexpressed 2
1433517_at	2.24861	up	Myeov2	myeloma overexpressed 2
1433606_at	2.37432	up	Dcp1a	DCP1 decapping enzyme homolog A (S. cerevisiae)
1433639_at	2.7677	up	5730593F17Rik	RIKEN cDNA 5730593F17 gene
1433668_at	2.77498	up	Pnrc1	proline-rich nuclear receptor coactivator 1
1433702_at	2.20824	up	Ermp1	endoplasmic reticulum metallopeptidase 1
1454706_at	3.28636	up	Uvrag	UV radiation resistance associated gene
1454711_at	2.21863	up	Trio	triple functional domain (PTPRF interacting)
1454735_at	4.30142	up	LOC100047199 /// Odf2	similar to outer dense fiber of sperm tails 2 /// outer dense fiber of sperm tails 2
1454747_a_at	6.63848	up	Klhdc3	kelch domain containing 3
1433991_x_at	2.37588	up	Dbi	diazepam binding inhibitor
1454807_a_at	2.5274	up	Snx12	sorting nexin 12
1434134_at	2.05533	up	Wdr42a	WD repeat domain 42A
1434138_at	2.70158	up	Prune	prune homolog (Drosophila)
1434143_at	2.10465	up	Atmin	ATM interactor
1434150_a_at	3.61339	up	Higd1c /// Mettl7a1 /// Mettl7a2	HIG1 domain family
1434155_a_at	3.23844	up	2310061I04Rik	RIKEN cDNA 2310061I04 gene
1454870_x_at	2.79302	up	Gpr172b	G protein-coupled receptor 172B
1434196_at	2.09161	up	Dnaja4	DnaJ (Hsp40) homolog
1434206_s_at	2.33964	up	Ppp2r5c	protein phosphatase 2
1434281_at	2.08992	up	Dda1	DET1 and DDB1 associated 1
1460565_at	2.43667	up	Slc41a1	solute carrier family 41
1454959_s_at	2.11324	up	Gnai1	guanine nucleotide binding protein (G protein)
1434499_a_at	3.42371	up	Ldhb	lactate dehydrogenase B
1434515_at	2.22873	up	Ncoa1	nuclear receptor coactivator 1
1455007_s_at	2.0263	up	Gpt2	glutamic pyruvate transaminase (alanine aminotransferase) 2
1455008_at	2.33952	up
1434551_at	2.378	up	Hnrnpul2	heterogeneous nuclear ribonucleoprotein U-like 2
1434561_at	3.82465	up	Asxl1	additional sex combs like 1 (Drosophila)
1434589_x_at	2.65731	up	Surf4	surfeit gene 4
1434628_a_at	2.38914	up	Rhpn2	rhophilin
1434633_at	3.58431	up	Crebbp	CREB binding protein
1434831_a_at	2.79525	up	Foxo3	forkhead box O3
1434832_at	2.20648	up	Foxo3	forkhead box O3
1434674_at	2.55324	up	Lyst	lysosomal trafficking regulator
1455056_at	2.79631	up	Lmo7	LIM domain only 7
1434676_at	2.16743	up	Mtmr9	myotubularin related protein 9
1455084_x_at	2.1656	up	Shmt2	serine hydroxymethyltransferase 2 (mitochondrial)
1455089_at	2.33972	up	Gng12	guanine nucleotide binding protein (G protein)
1434773_a_at	3.59221	up	Slc2a1	solute carrier family 2 (facilitated glucose transporter)
1434823_x_at	2.8101	up	Myeov2	myeloma overexpressed 2
1434920_a_at	3.40908	up	Evl /// LOC100047333	Ena-vasodilator stimulated phosphoprotein /// similar to Ena-VASP-like
1434924_at	2.3239	up	Phf2	PHD finger protein 2
1455155_at	3.01175	up	Lsm14b	LSM14 homolog B (SCD6
1434937_at	2.6279	up	Mycbp2	MYC binding protein 2
1435013_at	2.12398	up	Heatr2	HEAT repeat containing 2
1435056_x_at	3.90987	up	Pofut2	protein O-fucosyltransferase 2
1455205_a_at	2.06404	up	Usp19	ubiquitin specific peptidase 19
1435086_s_at	2.11361	up	Klhdc2	kelch domain containing 2
1455222_a_at	2.18739	up	Ubp1	upstream binding protein 1
1455229_x_at	2.30099	up	Pgs1	phosphatidylglycerophosphate synthase 1
1455235_x_at	2.26771	up	Ldhb	lactate dehydrogenase B
1435216_a_at	2.07803	up	Odf2	outer dense fiber of sperm tails 2
1435413_x_at	2.31275	up	2700060E02Rik	RIKEN cDNA 2700060E02 gene
1435502_a_at	3.0673	up	Brdt	bromodomain
1455356_at	2.02044	up	Camsap1	calmodulin regulated spectrin-associated protein 1
1435551_at	2.98096	up	Fhod3	formin homology 2 domain containing 3
1435602_at	2.58294	up	Sephs2	Selenophosphate synthetase 2 (Sephs2)
1435638_at	2.17598	up	Gsk3a	glycogen synthase kinase 3 alpha
1435652_a_at	2.47314	up	Gnai2	guanine nucleotide binding protein (G protein)
1435669_at	2.48435	up	Zfp532	zinc finger protein 532
1435800_a_at	3.67233	up	Csda	cold shock domain protein A
1435811_a_at	2.19833	up	Unc50	unc-50 homolog (C. elegans)
1435889_at	2.17195	up	Mark2	MAP/microtubule affinity-regulating kinase 2
1435967_s_at	2.48712	up	Hibadh	3-hydroxyisobutyrate dehydrogenase
1436026_at	3.55456	up	Zfp703	zinc finger protein 703
1436066_at	2.72854	up	Kalrn	kalirin
1436363_a_at	2.39841	up	Nfix	nuclear factor I/X
1436366_at	2.19854	up	Ppp1r15b	protein phosphatase 1
1436421_s_at	4.02231	up	Arpc5l	actin related protein 2/3 complex
1436588_at	2.30225	up	Rttn	rotatin
1436616_at	2.06256	up	Inpp4a	inositol polyphosphate-4-phosphatase
1436689_a_at	3.76501	up	Aldh9a1	aldehyde dehydrogenase 9
1456590_x_at	2.50009	up	Akr1b3	aldo-keto reductase family 1
1436736_x_at	2.7362	up	D0H4S114	DNA segment
1436775_a_at	2.50303	up	Ankrd17	ankyrin repeat domain 17
1455820_x_at	2.77115	up	Scarb1	scavenger receptor class B
1455822_x_at	2.43943	up	Surf4	surfeit gene 4
1436809_a_at	2.2233	up	LOC100046080 /// Spin1	similar to Spindlin 1 /// spindlin 1
1436824_x_at	4.16183	up	Rnf26	ring finger protein 26
1436845_at	3.64725	up	Axin2	axin2
1436905_x_at	4.10321	up	Laptm5	lysosomal-associated protein transmembrane 5
1436915_x_at	2.68076	up	Laptm4b	lysosomal-associated protein transmembrane 4B
1437008_x_at	2.71554	up	Tmem109	transmembrane protein 109
1437035_x_at	2.12657	up	Rnf14	ring finger protein 14
1437046_x_at	4.22727	up	Fam63a	family with sequence similarity 63
1437050_s_at	3.13582	up	Angel2	angel homolog 2 (Drosophila)
1437100_x_at	2.14743	up	Pim3	proviral integration site 3
1437112_at	2.35506	up	Pld1	phospholipase D1
1437113_s_at	2.78253	up	Pld1	phospholipase D1
1437132_x_at	2.23011	up	Nedd9	neural precursor cell expressed
1437133_x_at	3.13041	up	Akr1b3	aldo-keto reductase family 1
1455975_x_at	2.17835	up	Rnf114	ring finger protein 114
1437234_x_at	3.54549	up	Prmt2	protein arginine N-methyltransferase 2
1437239_x_at	3.0907	up	Phc2	polyhomeotic-like 2 (Drosophila)
1437279_x_at	2.42999	up	Sdc1	syndecan 1
1455994_x_at	2.28471	up	Elovl1	elongation of very long chain fatty acids (FEN1/Elo2
1456003_a_at	2.01136	up	Slc1a4	solute carrier family 1 (glutamate/neutral amino acid transporter)
1437325_x_at	3.0863	up	Aldh18a1	aldehyde dehydrogenase 18 family
1437331_a_at	2.25334	up	Arf3	ADP-ribosylation factor 3
1437345_a_at	4.00126	up	Bscl2	Bernardinelli-Seip congenital lipodystrophy 2 homolog (human)
1456017_x_at	2.73496	up	LOC666466 /// Obox2	similar to OBOX2 /// oocyte specific homeobox 2
1437378_x_at	2.68023	up	Scarb1	scavenger receptor class B
1437381_x_at	2.53827	up	Gpr172b	G protein-coupled receptor 172B
1456048_at	2.17886	up	Cpeb3	cytoplasmic polyadenylation element binding protein 3
1437419_at	2.76749	up	Bmp2k	BMP2 inducible kinase
1437450_x_at	2.27673	up	2700060E02Rik	RIKEN cDNA 2700060E02 gene
1456057_x_at	2.14901	up	Tmem109	transmembrane protein 109
1437503_a_at	2.74584	up	Shisa5	shisa homolog 5 (Xenopus laevis)
1437546_at	2.30501	up	Dnajc14	DnaJ (Hsp40) homolog
1437649_x_at	2.38855	up	Ppib	peptidylprolyl isomerase B
1439259_x_at	7.60747	up	Abhd4	abhydrolase domain containing 4
1456135_s_at	2.7451	up	Pxn	paxillin
1437722_x_at	3.26129	up	Pcbp3	Poly(rC) binding protein 3 (Pcbp3)
1456177_x_at	2.68514	up	Zfp706	zinc finger protein 706
1437830_x_at	7.48454	up	Zbed3	zinc finger
1437845_x_at	3.99202	up	Pofut2	protein O-fucosyltransferase 2
1456199_x_at	2.27758	up	LOC100045146 /// Ranbp9	similar to B cell antigen receptor Ig beta associated protein 1 /// RAN binding protein 9
1456225_x_at	2.79229	up	Trib3	tribbles homolog 3 (Drosophila)
1456240_x_at	2.40964	up	Cdca4	cell division cycle associated 4
1437985_a_at	4.68325	up	2310061I04Rik	RIKEN cDNA 2310061I04 gene
1437994_x_at	2.53965	up	Mier2	mesoderm induction early response 1
1438006_at	3.12823	up	4933439F18Rik	RIKEN cDNA 4933439F18 gene
1438019_at	3.12009	up	Ippk	inositol 1
1456305_x_at	3.74846	up	LOC666466 /// Obox2	similar to OBOX2 /// oocyte specific homeobox 2
1438167_x_at	3.32342	up	Flcn	folliculin
1438171_x_at	2.02428	up	Mettl9	methyltransferase like 9
1438177_x_at	2.47919	up	Entpd4 /// LOC100048085	ectonucleoside triphosphate diphosphohydrolase 4 /// similar to ectonucleoside triphosphate diphosphohydrolase 4
1438251_x_at	3.0041	up	Htra1	HtrA serine peptidase 1
1438297_at	2.90609	up	AA545190	EST AA545190
1438321_x_at	3.68437	up	Fam63a	family with sequence similarity 63
1438365_x_at	2.43108	up	Laptm4b	lysosomal-associated protein transmembrane 4B
1438619_x_at	2.07603	up	Zdhhc14	zinc finger
1438625_s_at	2.29528	up	Pctk1	PCTAIRE-motif protein kinase 1
1460004_x_at	4.19096	up	Stx6	syntaxin 6
1438669_at	2.17218	up	Wdr40a	WD repeat domain 40A
1438677_at	2.99526	up	Pkp4	plakophilin 4
1438680_at	4.44319	up	Auts2	autism susceptibility candidate 2
1456510_x_at	3.21204	up	Higd1c /// Mettl7a2	HIG1 domain family
1456530_x_at	2.56884	up	Elovl1	elongation of very long chain fatty acids (FEN1/Elo2
1438917_x_at	2.14307	up	Nup62	nucleoporin 62
1438928_x_at	3.91731	up	Ninj1	ninjurin 1
1438941_x_at	2.2129	up	Ampd2	adenosine monophosphate deaminase 2 (isoform L)
1456585_x_at	2.21313	up	E130309D02Rik	RIKEN cDNA E130309D02 gene
1439241_x_at	3.00959	up	LOC100044230 /// Srd5a3	hypothetical protein LOC100044230 /// steroid 5 alpha-reductase 3
1439251_at	2.4554	up	100042616	predicted gene
1439380_x_at	2.03124	up	Meg3	maternally expressed 3
1439388_s_at	3.12795	up	Bcar1	breast cancer anti-estrogen resistance 1
1456736_x_at	3.92999	up	Mff	mitochondrial fission factor
1439429_x_at	2.48769	up	Dtx2	deltex 2 homolog (Drosophila)
1439440_x_at	2.20687	up	Twf2	twinfilin
1439451_x_at	2.54001	up	Gpr172b	G protein-coupled receptor 172B
1439771_s_at	3.07846	up	D13Ertd608e	DNA segment
1443762_s_at	3.29437	up	Sbf2	SET binding factor 2
1444028_s_at	2.14073	up	Dock9	dedicator of cytokinesis 9
1447377_at	2.68152	up	Gm428	gene model 428
1448021_at	2.97354	up
1419935_s_at	2.17456	up
1449800_x_at	3.86998	up	Phf7	PHD finger protein 7
1420301_at	4.06113	up	AA414903	expressed sequence AA414903

## Sheet: mouse 4v8
The regulated genes from 4-cell to 8-cell stage of mouse
Probe Set ID	Fold change([4] vs [8])	Regulation([4] vs [8])	Gene Symbol	Gene Title
AFFX-b-ActinMur/M12481_M_at	2.62035	down	Actb	actin
AFFX-b-ActinMur/M12481_3_at	5.51926	down	Actb	actin
AFFX-18SRNAMur/X00686_5_at	2.37193	down
AFFX-18SRNAMur/X00686_M_at	2.12476	down
1460633_at	2.7998	down	Prpf19	PRP19/PSO4 pre-mRNA processing factor 19 homolog (S. cerevisiae)
1415672_at	3.30705	down	Golga7	golgi autoantigen
1415702_a_at	3.16852	down	Ctbp1 /// LOC100045360	C-terminal binding protein 1 /// similar to CtBP1 protein
1415679_at	6.89184	down	OTTMUSG00000006606 /// Psenen	predicted gene
1415724_a_at	3.7815	down	Cdc42	cell division cycle 42 homolog (S. cerevisiae)
1460708_s_at	2.54615	down	Cdc42	cell division cycle 42 homolog (S. cerevisiae)
1415687_a_at	3.03119	down	Psap	prosaposin
1415690_at	4.07201	down	EG622268 /// Mrpl27	predicted gene
1415695_at	2.5663	down	Psma1	proteasome (prosome
1415703_at	2.31038	down	Huwe1	HECT
1415707_at	2.50575	down	Anapc2	anaphase promoting complex subunit 2
1460698_a_at	2.44713	down	Sec11c	SEC11 homolog C (S. cerevisiae)
1460701_a_at	3.15574	down	Mrpl52	mitochondrial ribosomal protein L52
1415762_x_at	2.04167	down	Mrpl52	mitochondrial ribosomal protein L52
1415765_at	2.53574	down	Hnrnpul2	heterogeneous nuclear ribonucleoprotein U-like 2
1415779_s_at	7.73452	down	Actg1	actin
1415800_at	3.77422	down	Gja1	gap junction protein
1415813_at	3.63633	down	Api5	apoptosis inhibitor 5
1415816_at	2.09386	down	Cct7	chaperonin containing Tcp1
1415822_at	17.5229	down	Scd2	stearoyl-Coenzyme A desaturase 2
1415829_at	2.03322	down	Lbr	lamin B receptor
1415830_at	2.36374	down	Orc5l	origin recognition complex
1415831_at	3.4046	down	Psmd2	proteasome (prosome
1415840_at	8.23272	down	Elovl5	ELOVL family member 5
1425364_a_at	3.08556	down	Slc3a2	solute carrier family 3 (activators of dibasic and neutral amino acid transport)
1448118_a_at	2.26273	down	Ctsd	cathepsin D
1415869_a_at	2.10522	down	Trim28	tripartite motif-containing 28
1415879_a_at	2.26094	down	Rplp2	ribosomal protein
1415880_a_at	3.96866	down	Lamp1	lysosomal-associated membrane protein 1
1448129_at	2.6358	down	Arpc5	actin related protein 2/3 complex
1415881_at	2.13151	down	Ghitm	growth hormone inducible transmembrane protein
1415891_at	2.46871	down	Suclg1	succinate-CoA ligase
1459986_a_at	2.47757	down	100040123 /// Rps17	predicted gene
1455662_x_at	2.39126	down	Rps17	ribosomal protein S17
1415909_at	2.61823	down	Stip1	stress-induced phosphoprotein 1
1415916_a_at	2.69463	down	Mthfd1	methylenetetrahydrofolate dehydrogenase (NADP+ dependent)
1415917_at	2.05472	down	Mthfd1	methylenetetrahydrofolate dehydrogenase (NADP+ dependent)
1448148_at	4.6624	down	Grn	granulin
1415922_s_at	2.76383	down	Marcksl1	MARCKS-like 1
1415942_at	2.49231	down	100041509 /// EG234703 /// EG665071 /// ENSMUSG00000058443 /// LOC100048223 /// LOC100048462 /// OTTMUSG00000015005 /// Rpl10	predicted gene
1455106_a_at	5.59495	down	Ckb	creatine kinase
1415947_at	2.43448	down	Creg1 /// Pappa2	cellular repressor of E1A-stimulated genes 1 /// pappalysin 2
1415966_a_at	3.43838	down	Ndufv1	NADH dehydrogenase (ubiquinone) flavoprotein 1
1415967_at	2.6173	down	Ndufv1	NADH dehydrogenase (ubiquinone) flavoprotein 1
1415970_at	2.38771	down	Cox6c	cytochrome c oxidase
1415971_at	4.07821	down	Marcks	myristoylated alanine rich protein kinase C substrate
1415977_at	6.69079	down	Isyna1	myo-inositol 1-phosphate synthase A1
1426162_a_at	2.12538	down	Rpl7	ribosomal protein L7
1415980_at	3.2674	down	Atp5g2	ATP synthase
1415986_at	2.87211	down	Clcn4-2	chloride channel 4-2
1448166_a_at	2.09789	down	Psmb1	proteasome (prosome
1415995_at	2.38619	down	Casp6	caspase 6
1415998_at	2.90372	down	Vdac1	voltage-dependent anion channel 1
1448169_at	4.94704	down	Krt18	keratin 18
1416005_at	2.2871	down	Psmc1	protease (prosome
1416008_at	2.93673	down	Satb1	special AT-rich sequence binding protein 1
1416010_a_at	5.03563	down	Ehd1	EH-domain containing 1
1448175_at	2.92327	down	Ehd1	EH-domain containing 1
1416011_x_at	3.75782	down	Ehd1	EH-domain containing 1
1416013_at	2.2007	down	Pld3	phospholipase D family
1416020_a_at	2.66883	down	Atp5g1 /// ENSMUSG00000058357	ATP synthase
1416021_a_at	18.0359	down	EG620603 /// Fabp5	predicted gene
1416022_at	3.88168	down	Fabp5	fatty acid binding protein 5
1416023_at	3.45813	down	Fabp3	fatty acid binding protein 3
1416026_a_at	2.35618	down	Rpl12	ribosomal protein L12
1416027_at	4.14683	down	Pdcd6	programmed cell death 6
1416029_at	2.42416	down	Klf10	Kruppel-like factor 10
1448184_at	2.36286	down	Fkbp1a	FK506 binding protein 1a
1416041_at	2.30399	down	Sgk1	serum/glucocorticoid regulated kinase 1
1448189_a_at	3.11464	down	Flii	flightless I homolog (Drosophila)
1416044_at	3.23034	down	Flii	flightless I homolog (Drosophila)
1416049_at	2.06293	down	Gldc	glycine decarboxylase
1448198_a_at	4.12532	down	Ndufb8	NADH dehydrogenase (ubiquinone) 1 beta subcomplex 8
1416066_at	4.67091	down	Cd9	CD9 antigen
1416071_at	2.03114	down	Ddx18	DEAD (Asp-Glu-Ala-Asp) box polypeptide 18
1416074_a_at	2.41273	down	ENSMUSG00000058905 /// OTTMUSG00000021838 /// Rpl28	predicted gene
1448206_at	2.74695	down	Psma2	proteasome (prosome
1460173_at	2.64209	down	Lasp1	LIM and SH3 protein 1
1448210_at	2.68555	down	Rab1	RAB1
1448212_at	3.43785	down	Psmg2	proteasome (prosome
1416088_a_at	3.04333	down	LOC100046223 /// Rps15	similar to insulinoma protein (rig) /// ribosomal protein S15
1416089_at	3.54672	down	Rps15	ribosomal protein S15
1448217_a_at	2.24606	down	EG621100 /// EG622236 /// OTTMUSG00000001643 /// Rpl27	predicted gene
1416099_at	2.88289	down	EG621100 /// OTTMUSG00000001643 /// Rpl27	predicted gene
1416100_at	2.66003	down	Eif3d	eukaryotic translation initiation factor 3
1416104_at	2.09693	down	Mpdu1	mannose-P-dolichol utilization defect 1
1425811_a_at	2.93896	down	Csrp1	cysteine and glycine-rich protein 1
1416119_at	5.85031	down	Txn1	thioredoxin 1
1416126_at	2.18253	down	Polr1b	polymerase (RNA) I polypeptide B
1416127_a_at	2.64513	down	Dnpep	aspartyl aminopeptidase
1416142_at	2.23597	down	Rps6	ribosomal protein S6
1416181_at	4.0941	down	Mesdc2	mesoderm development candidate 2
1416182_at	3.63931	down	Apba3	amyloid beta (A4) precursor protein-binding
1448241_at	2.83819	down	Gm2a	GM2 ganglioside activator protein
1416208_at	2.65874	down	Usp14	ubiquitin specific peptidase 14
1448252_a_at	2.71721	down	Eef1b2	eukaryotic translation elongation factor 1 beta 2
1416214_at	2.10783	down	Mcm4	minichromosome maintenance deficient 4 homolog (S. cerevisiae)
1448256_at	2.33316	down	Gosr1	golgi SNAP receptor complex member 1
1416217_a_at	2.02744	down	100042986 /// OTTMUSG00000015874 /// Rpl37a	predicted gene
1416219_at	2.12692	down	Rpl19	ribosomal protein L19
1416226_at	2.64423	down	Arpc1b	actin related protein 2/3 complex
1448261_at	12.3691	down	Cdh1	cadherin 1
1448262_at	2.7053	down	Psmb2	proteasome (prosome
1416229_at	2.24904	down	Rfk	riboflavin kinase
1416230_at	2.30167	down	Rfk	riboflavin kinase
1448263_a_at	2.49357	down	Cndp2	CNDP dipeptidase 2 (metallopeptidase M20 family)
1460177_at	2.19703	down	Cndp2	CNDP dipeptidase 2 (metallopeptidase M20 family)
1416236_a_at	16.849	down	Mpzl2	myelin protein zero-like 2
1448265_x_at	3.00404	down	Mpzl2	myelin protein zero-like 2
1416237_at	2.20829	down	Mpzl2	myelin protein zero-like 2
1416241_at	2.67621	down	Sec13	SEC13 homolog (S. cerevisiae)
1448270_at	3.02921	down	Ddx21	DEAD (Asp-Glu-Ala-Asp) box polypeptide 21
1448273_at	2.15929	down	Gss	glutathione synthetase
1448277_at	2.35416	down	Pold2	polymerase (DNA directed)
1448279_at	2.4724	down	Arpc3	actin related protein 2/3 complex
1449712_s_at	2.06215	down	Atp6v1e1	ATPase
1416271_at	19.3104	down	Perp	PERP
1416277_a_at	2.87641	down	Rplp1	ribosomal protein
1416282_at	3.02321	down	Psmc3	proteasome (prosome
1448286_at	2.80458	down	Hsd17b10	hydroxysteroid (17-beta) dehydrogenase 10
1416291_at	2.10764	down	Psmc4	proteasome (prosome
1416299_at	3.10352	down	Shcbp1	Shc SH2-domain binding protein 1
1448292_at	2.61883	down	Uqcr	ubiquinol-cytochrome c reductase (6.4kD) subunit
1448299_at	2.99204	down	Slc1a1	solute carrier family 1 (neuronal/epithelial high affinity glutamate transporter
1416335_at	3.60785	down	Mif	macrophage migration inhibitory factor
1416337_at	3.2715	down	Uqcrb	ubiquinol-cytochrome c reductase binding protein
1429681_a_at	2.18219	down	Gpsn2	glycoprotein
1416365_at	4.11445	down	Hsp90ab1	heat shock protein 90 alpha (cytosolic)
1416366_at	2.93452	down	LOC675851 /// Ndufc2	similar to NADH dehydrogenase (ubiquinone) 1
1448308_at	2.63561	down	Ap3m1	adaptor-related protein complex 3
1448315_a_at	2.81645	down	Pycr2	pyrroline-5-carboxylate reductase family
1416392_a_at	2.03881	down	Atp6v0c /// Atp6v0c-ps2	ATPase
1416395_at	2.20959	down	Guk1	guanylate kinase 1
1448322_a_at	2.03781	down	Cox4i1	cytochrome c oxidase subunit IV isoform 1
1416410_at	2.44815	down	Pafah1b3	platelet-activating factor acetylhydrolase
1416417_a_at	2.14807	down	Ndufb7	NADH dehydrogenase (ubiquinone) 1 beta subcomplex
1448331_at	2.62643	down	Ndufb7	NADH dehydrogenase (ubiquinone) 1 beta subcomplex
1416419_s_at	2.41259	down	Gabarapl1	gamma-aminobutyric acid (GABA(A)) receptor-associated protein-like 1
1448333_at	2.08154	down	Adprh	ADP-ribosylarginine hydrolase
1416429_a_at	8.66483	down	Cat	catalase
1416442_at	2.01699	down	Ier2	immediate early response 2
1448344_at	2.03011	down	EG432865 /// EG665281 /// EG668406 /// ENSMUSG00000059333 /// LOC100038978 /// LOC100039828 /// LOC676277 /// OTTMUSG00000006191 /// OTTMUSG00000018594 /// OTTMUSG00000027340 /// Rps12	predicted gene
1424681_a_at	2.19956	down	Psma5	proteasome (prosome
1460184_at	7.46528	down	Hadh	hydroxyacyl-Coenzyme A dehydrogenase
1416465_a_at	2.17896	down	Vapa	vesicle-associated membrane protein
1416470_a_at	3.09188	down	Rpn1	ribophorin I
1448353_x_at	3.41368	down	Rpn1	ribophorin I
1460495_s_at	3.07384	down	Htra2	HtrA serine peptidase 2
1416486_at	3.56489	down	Scye1	small inducible cytokine subfamily E
1416493_at	2.23427	down	Ddost	dolichyl-di-phosphooligosaccharide-protein glycotransferase
1416494_at	2.48253	down	BC002163 /// Ndufs5	cDNA sequence BC002163 /// NADH dehydrogenase (ubiquinone) Fe-S protein 5
1416495_s_at	3.81441	down	BC002163 /// Ndufs5	cDNA sequence BC002163 /// NADH dehydrogenase (ubiquinone) Fe-S protein 5
1416498_at	2.33365	down	Ppic	peptidylprolyl isomerase C
1416499_a_at	3.4042	down	Dctn6	dynactin 6
1416505_at	2.05248	down	Nr4a1	nuclear receptor subfamily 4
1448371_at	4.46108	down	Mylpf	myosin light chain
1416509_at	4.69816	down	Tm9sf3	transmembrane 9 superfamily member 3
1416519_at	2.8543	down	LOC100048508 /// OTTMUSG00000012957 /// Rpl36	similar to Rpl36 protein /// predicted gene
1416520_x_at	2.69295	down	100043718 /// LOC100048508 /// OTTMUSG00000012957 /// Rpl36	predicted gene
1416528_at	2.24422	down	Sh3bgrl3	SH3 domain binding glutamic acid-rich protein-like 3
1416531_at	17.2994	down	Gsto1	glutathione S-transferase omega 1
1416557_a_at	2.08534	down	Eftud2	elongation factor Tu GTP binding domain containing 2
1416567_s_at	2.41235	down	Atp5e	ATP synthase
1431609_a_at	3.43025	down	Acp5	acid phosphatase 5
1448387_at	2.10001	down	Rbx1	ring-box 1
1416587_a_at	2.1999	down	Xrcc1	X-ray repair complementing defective repair in Chinese hamster cells 1
1448393_at	3.50291	down	Cldn7	claudin 7
1448395_at	2.29224	down	Sfrp1	secreted frizzled-related protein 1
1416600_a_at	2.46179	down	Rcan1	regulator of calcineurin 1
1416605_at	3.09865	down	Nhp2	NHP2 ribonucleoprotein homolog (yeast)
1448403_at	2.48609	down	Lars	leucyl-tRNA synthetase
1416627_at	2.71341	down	Spint1	serine protease inhibitor
1416630_at	11.7002	down	Id3	inhibitor of DNA binding 3
1416633_a_at	2.97835	down	Fam96a	family with sequence similarity 96
1416634_at	3.2365	down	Fam96a	family with sequence similarity 96
1416635_at	8.70124	down	Smpdl3a	sphingomyelin phosphodiesterase
1416641_at	3.1214	down	Lig1	ligase I
1416648_at	2.17033	down	Dync1h1	dynein cytoplasmic 1 heavy chain 1
1416655_at	2.34186	down	C1galt1c1	C1GALT1-specific chaperone 1
1416663_at	2.99167	down	Ndufa9	NADH dehydrogenase (ubiquinone) 1 alpha subcomplex
1416665_at	2.19087	down	Coq7	demethyl-Q 7
1416668_at	2.32765	down	Ttc35	tetratricopeptide repeat domain 35
1448430_a_at	2.11413	down	Naca	nascent polypeptide-associated complex alpha polypeptide
1416675_s_at	3.11971	down	Plcd1	phospholipase C
1416679_at	7.8469	down	Abcd3	ATP-binding cassette
1416683_at	3.08632	down	Plxnb2	plexin B2
1448438_at	2.26127	down	Derl2	Der1-like domain family
1448441_at	2.20466	down	Cks1b	CDC28 protein kinase 1b
1448447_at	2.75951	down	Vps28	vacuolar protein sorting 28 (yeast)
1448450_at	2.23224	down	Ak2 /// LOC100047005	adenylate kinase 2 /// similar to adenylate kinase 2
1416715_at	8.9291	down	Gjb3	gap junction protein
1416719_a_at	3.16206	down	Rps10	ribosomal protein S10
1438723_a_at	3.00528	down	Rps10	ribosomal protein S10
1456497_x_at	2.7225	down	Rps10	ribosomal protein S10
1416726_s_at	2.02686	down	Ube2s	ubiquitin-conjugating enzyme E2S
1416727_a_at	2.91047	down	Cyb5	cytochrome b-5
1448456_at	2.35838	down	Cln8	ceroid-lipofuscinosis
1416764_at	2.27161	down	Fis1	fission 1 (mitochondrial outer membrane) homolog (yeast)
1416771_at	2.4742	down	Trappc3	trafficking protein particle complex 3
1448460_at	2.25129	down	Acvr1	activin A receptor
1416788_a_at	2.23424	down	Idh3g	isocitrate dehydrogenase 3 (NAD+)
1416789_at	3.29819	down	Idh3g	isocitrate dehydrogenase 3 (NAD+)
1416796_at	2.4707	down	LOC100044475 /// Nck2	similar to SH2/SH3 adaptor protein /// non-catalytic region of tyrosine kinase adaptor protein 2
1416807_at	2.7835	down	100040331 /// EG624713 /// EG666243 /// EG667549 /// LOC100048339 /// OTTMUSG00000005111 /// OTTMUSG00000009278 /// Rpl36a /// Rpl36al	predicted gene
1416808_at	8.89018	down	Nid1	nidogen 1
1416830_at	2.62508	down	0610031J06Rik	RIKEN cDNA 0610031J06 gene
1448479_at	3.70197	down	Psmd3	proteasome (prosome
1448485_at	2.23343	down	Ggt1	gamma-glutamyltransferase 1
1416837_at	3.44558	down	Bax	BCL2-associated X protein
1448488_at	2.14863	down	Mrps5	mitochondrial ribosomal protein S5
1416896_at	2.65448	down	Rps6ka1	ribosomal protein S6 kinase polypeptide 1
1416907_at	3.09713	down	Tsn	translin
1448516_at	2.09916	down	Tsn	translin
1416921_x_at	3.1751	down	Aldoa	aldolase A
1448524_s_at	3.05758	down	Ssr4	signal sequence receptor
1416949_s_at	2.85761	down	Slc39a7	solute carrier family 39 (zinc transporter)
1416953_at	14.1045	down	Ctgf	connective tissue growth factor
1416961_at	2.44216	down	Bub1b	budding uninhibited by benzimidazoles 1 homolog
1416962_at	2.03825	down	Rcc1	regulator of chromosome condensation 1
1453473_a_at	2.37627	down	Dynlt1 /// Dynlt1d /// Dynlt1e /// ENSMUSG00000056252 /// LOC100040531 /// LOC100040563	dynein light chain Tctex-type 1 /// dynein light chain Tctex-type 1D /// dynein light chain Tctex-type 1E /// predicted gene
1451695_a_at	2.1588	down	Gpx4	glutathione peroxidase 4
1416988_at	2.608	down	Msh2	mutS homolog 2 (E. coli)
1448536_at	3.39342	down	Lsm3	LSM3 homolog
1416990_at	2.15617	down	Rxrb	retinoid X receptor beta
1448542_at	2.24234	down	Bccip	BRCA2 and CDKN1A interacting protein
1417040_a_at	2.24373	down	Bok	BCL2-related ovarian killer protein
1460198_a_at	5.37735	down	Psmb3	proteasome (prosome
1417052_at	2.90133	down	Psmb3	proteasome (prosome
1417053_at	3.15069	down	Phb	prohibitin
1417058_a_at	8.46615	down	Krtcap2	keratinocyte associated protein 2
1417059_at	4.28923	down	Krtcap2	keratinocyte associated protein 2
1448573_a_at	9.64095	down	Ceacam10	carcinoembryonic antigen-related cell adhesion molecule 10
1417074_at	2.11956	down	Ceacam10	carcinoembryonic antigen-related cell adhesion molecule 10
1417075_at	3.88131	down	2010309E21Rik	RIKEN cDNA 2010309E21 gene
1417083_at	2.16492	down	Sec61b	Sec61 beta subunit
1417089_a_at	3.3038	down	Ckmt1	creatine kinase
1448592_at	2.06458	down	Crtap	cartilage associated protein
1417116_at	2.13602	down	Slc6a8	solute carrier family 6 (neurotransmitter transporter
1448596_at	3.52249	down	Slc6a8	solute carrier family 6 (neurotransmitter transporter
1417125_at	6.72411	down	Ahcy	S-adenosylhomocysteine hydrolase
1417143_at	2.00019	down	Lpar1	lysophosphatidic acid receptor 1
1417157_at	2.19217	down	Actr10	ARP10 actin-related protein 10 homolog (S. cerevisiae)
1425525_a_at	2.69295	down	P2rx4	purinergic receptor P2X
1417177_at	2.60402	down	Galk1	galactokinase 1
1417185_at	10.0008	down	Ly6a	lymphocyte antigen 6 complex
1417203_at	4.88894	down	Ethe1	ethylmalonic encephalopathy 1
1417204_at	3.40755	down	Kdelr2	KDEL (Lys-Asp-Glu-Leu) endoplasmic reticulum protein retention receptor 2
1417205_at	2.27343	down	Kdelr2	KDEL (Lys-Asp-Glu-Leu) endoplasmic reticulum protein retention receptor 2
1417212_at	2.57886	down	9530058B02Rik	RIKEN cDNA 9530058B02 gene
1448619_at	2.05271	down	Dhcr7	7-dehydrocholesterol reductase
1417227_at	2.01359	down	Mccc1	methylcrotonoyl-Coenzyme A carboxylase 1 (alpha)
1448630_a_at	2.93485	down	Sdhc	succinate dehydrogenase complex
1417239_at	2.67243	down	Cetn3	centrin 3
1417252_at	3.29427	down	Nt5c	5'
1417253_at	2.82271	down	Frg1	FSHD region gene 1
1417259_a_at	4.31337	down	Capzb	capping protein (actin filament) muscle Z-line
1420196_s_at	3.03473	down	Tbc1d14	TBC1 domain family
1448649_at	4.61226	down	Enpep	glutamyl aminopeptidase
1417285_a_at	3.83864	down	Ndufa5	NADH dehydrogenase (ubiquinone) 1 alpha subcomplex
1417287_at	2.03248	down	H13	histocompatibility 13
1430474_a_at	2.90492	down	Mtch2	mitochondrial carrier homolog 2 (C. elegans)
1448654_at	2.35159	down	Mtch2	mitochondrial carrier homolog 2 (C. elegans)
1448663_s_at	2.04147	down	Mvd	mevalonate (diphospho) decarboxylase
1417311_at	3.13786	down	Crip2	cysteine rich protein 2
1428782_a_at	2.80912	down	Uqcrc1	ubiquinol-cytochrome c reductase core protein 1
1448672_a_at	2.02198	down	Arfgap2	ADP-ribosylation factor GTPase activating protein 2
1417320_at	2.27694	down	Grpel1	GrpE-like 1
1417323_at	4.53985	down	Psrc1	proline/serine-rich coiled-coil 1
1425680_a_at	2.23556	down	Btrc	beta-transducin repeat containing protein
1417325_at	2.50176	down	Btrc	beta-transducin repeat containing protein
1448685_at	2.13339	down	2900010M23Rik	RIKEN cDNA 2900010M23 gene
1417349_at	2.15645	down	Pldn	pallidin
1417357_at	2.15265	down	Emd	emerin
1417364_at	3.04769	down	Eef1g /// LOC100047986	eukaryotic translation elongation factor 1 gamma /// similar to eukaryotic translation elongation factor 1 gamma
1417369_at	3.06923	down	Hsd17b4	hydroxysteroid (17-beta) dehydrogenase 4
1417379_at	2.15876	down	Iqgap1	IQ motif containing GTPase activating protein 1
1417393_a_at	2.4107	down	Fam132a	family with sequence similarity 132
1417398_at	4.16329	down	Rras2	related RAS viral (r-ras) oncogene homolog 2
1417409_at	3.5595	down	Jun	Jun oncogene
1417432_a_at	2.97025	down	Gnb1	guanine nucleotide binding protein (G protein)
1417443_at	3.30708	down	Fam151a	family with sequence simliarity 151
1448712_at	2.05758	down	Chm	choroidermia
1417452_a_at	2.23494	down	ENSMUSG00000050299 /// Fau	predicted gene
1417460_at	2.06873	down	Ifitm2	interferon induced transmembrane protein 2
1448724_at	2.14847	down	Cish	cytokine inducible SH2-containing protein
1448739_x_at	2.46743	down	ENSMUSG00000069117 /// LOC100042388 /// LOC100047329 /// LOC100047828 /// OTTMUSG00000000655 /// Rps18	predicted gene
1417551_at	3.09054	down	Cln3	ceroid lipofuscinosis
1417562_at	6.01585	down	Eif4ebp1	eukaryotic translation initiation factor 4E binding protein 1
1448770_a_at	2.17723	down	Atpif1	ATPase inhibitory factor 1
1417608_a_at	2.29607	down	Rpl13a	ribosomal protein L13a
1460211_a_at	2.03021	down	Kdelr1	KDEL (Lys-Asp-Glu-Leu) endoplasmic reticulum protein retention receptor 1
1417625_s_at	4.1815	down	Cxcr7	chemokine (C-X-C motif) receptor 7
1417648_s_at	2.59269	down	Snx5	sorting nexin 5
1417652_a_at	2.53939	down	Tbca	tubulin cofactor a
1437907_a_at	5.31887	down	Tbca	tubulin cofactor a
1456205_x_at	3.86073	down	Tbca	tubulin cofactor a
1417654_at	13.4568	down	Sdc4	syndecan 4
1448793_a_at	8.62333	down	Sdc4	syndecan 4
1417660_s_at	3.20675	down	Vps29	vacuolar protein sorting 29 (S. pombe)
1417692_at	2.70657	down	Drg2	developmentally regulated GTP binding protein 2
1417693_a_at	2.99287	down	Gab1	growth factor receptor bound protein 2-associated protein 1
1417694_at	4.62635	down	Gab1	growth factor receptor bound protein 2-associated protein 1
1448816_at	3.02658	down	Ptgis	prostaglandin I2 (prostacyclin) synthase
1448819_at	2.25644	down	Eif2s2	eukaryotic translation initiation factor 2
1448822_at	2.63949	down	Psmb6	proteasome (prosome
1417727_at	2.88367	down	Sfrs9	splicing factor
1436121_a_at	2.79722	down	Nsmce1	non-SMC element 1 homolog (S. cerevisiae)
1417737_at	2.04939	down	Mrps31	mitochondrial ribosomal protein S31
1417742_a_at	2.85707	down	Dmap1	DNA methyltransferase 1-associated protein 1
1449660_s_at	2.30003	down	Coro1c	coronin
1417752_at	2.5229	down	Coro1c	coronin
1417762_a_at	3.65814	down	Rpl8	ribosomal protein L8
1417770_s_at	6.53958	down	Psmc6	proteasome (prosome
1417772_at	2.28294	down	Grhpr	glyoxylate reductase/hydroxypyruvate reductase
1417777_at	3.79395	down	Ptgr1	prostaglandin reductase 1
1417796_at	2.17021	down	Gps2	G protein pathway suppressor 2
1417801_a_at	2.42182	down	Ppfibp2	protein tyrosine phosphatase
1448846_a_at	2.83294	down	433941 /// 622707 /// EG666642 /// ENSMUSG00000074516 /// LOC100044494 /// OTTMUSG00000007230 /// OTTMUSG00000014710 /// Rpl29	predicted gene
1436046_x_at	2.64136	down	100041859 /// 622707 /// EG666642 /// ENSMUSG00000074516 /// LOC100044494 /// OTTMUSG00000014710 /// OTTMUSG00000023237 /// Rpl29	predicted gene
1417823_at	2.52872	down	Gcat	glycine C-acetyltransferase (2-amino-3-ketobutyrate-coenzyme A ligase)
1417825_at	2.05449	down	Esd	esterase D/formylglutathione hydrolase
1417914_at	2.11724	down	Rap2b	RAP2B
1417916_a_at	2.40079	down	Fxc1	fractured callus expressed transcript 1
1448887_x_at	3.14269	down	Fxc1	fractured callus expressed transcript 1
1448889_at	2.86035	down	Slc38a4	solute carrier family 38
1448894_at	10.1595	down	Akr1b8	aldo-keto reductase family 1
1417945_at	13.6828	down	Pou5f1	POU domain
1448903_at	2.54435	down	2004-09-15	selenoprotein
1448904_at	2.11615	down	Fam3c	family with sequence similarity 3
1417957_a_at	5.65916	down	Tspan1	tetraspanin 1
1418000_a_at	2.35216	down	Itm2b	integral membrane protein 2B
1418014_a_at	2.46646	down	B4galt1	UDP-Gal:betaGlcNAc beta 1
1448921_a_at	2.58082	down	Mrps9	mitochondrial ribosomal protein S9
1418038_s_at	2.26132	down	Dusp19	dual specificity phosphatase 19
1418039_at	2.86103	down	Rabl3	RAB
1418043_at	2.02961	down	Abcc5	ATP-binding cassette
1418073_at	2.12032	down	Acot9	acyl-CoA thioesterase 9
1418076_at	5.72598	down	St14	suppression of tumorigenicity 14 (colon carcinoma)
1418086_at	6.08117	down	Ppp1r14a	protein phosphatase 1
1418089_at	2.46047	down	Stx8	syntaxin 8
1418091_at	23.5345	down	Tcfcp2l1	transcription factor CP2-like 1
1460224_at	2.83305	down	Snx2	sorting nexin 2
1448956_at	3.56277	down	Stard10	START domain containing 10
1448967_at	4.20125	down	Nipsnap3a	nipsnap homolog 3A (C. elegans)
1420113_s_at	3.22839	down	2410022L05Rik	RIKEN cDNA 2410022L05 gene
1448979_at	2.35101	down	Muted	muted
1448987_at	4.48199	down	Acadl	acyl-Coenzyme A dehydrogenase
1418198_a_at	3.2272	down	Tm9sf1	transmembrane 9 superfamily member 1
1418234_s_at	2.19052	down	Bcas2	breast carcinoma amplified sequence 2
1418244_at	3.46671	down	Nat5	N-acetyltransferase 5 (ARD1 homolog
1418257_at	5.97299	down	Slc12a7	solute carrier family 12
1449011_at	3.69976	down	Slc12a7	solute carrier family 12
1418283_at	7.97121	down	Cldn4	claudin 4
1449021_at	2.15152	down	Rpp21	ribonuclease P 21 subunit (human)
1418288_at	3.20476	down	Lpin1	lipin 1
1449024_a_at	9.44802	down	Hexa	hexosaminidase A
1418301_at	2.56933	down	Irf6	interferon regulatory factor 6
1418331_at	2.0432	down	1110031I02Rik	RIKEN cDNA 1110031I02 gene
1449044_at	3.22535	down	Eef1e1	eukaryotic translation elongation factor 1 epsilon 1
1418335_a_at	2.83678	down	Dph1 /// RP23-143A14.5	DPH1 homolog (S. cerevisiae) /// candidate tumor suppressor in ovarian cancer 2
1418347_at	2.02329	down	Ccdc22	coiled-coil domain containing 22
1449052_a_at	4.76197	down	Dnmt3b	DNA methyltransferase 3B
1418351_a_at	2.41369	down	Dnmt3b	DNA methyltransferase 3B
1418362_at	4.49201	down	Zfp42	zinc finger protein 42
1449059_a_at	2.75013	down	Oxct1	3-oxoacid CoA transferase 1
1418364_a_at	2.69655	down	EG665937 /// ENSMUSG00000062382 /// Ftl1 /// Ftl2	predicted gene
1422302_s_at	2.72654	down	EG665937 /// ENSMUSG00000062382 /// Ftl1 /// Ftl2	predicted gene
1449064_at	2.38898	down	Tdh	L-threonine dehydrogenase
1418380_at	2.42765	down	Terf1	telomeric repeat binding factor 1
1418434_at	2.31779	down	Mkrn1	makorin
1418435_at	3.47154	down	Mkrn1	makorin
1418436_at	4.9095	down	Stx7	syntaxin 7
1449088_at	7.18271	down	Fbp2	fructose bisphosphatase 2
1449095_at	3.44591	down	Vps54	vacuolar protein sorting 54 (yeast)
1418479_at	3.20947	down	Vps54	vacuolar protein sorting 54 (yeast)
1418482_at	2.15209	down	Cyb561d2	cytochrome b-561 domain containing 2
1449099_at	2.01684	down	Lrba	LPS-responsive beige-like anchor
1418486_at	13.554	down	Vnn1	vanin 1
1449108_at	2.36126	down	Fdx1	ferredoxin 1
1449110_at	5.70121	down	Rhob	ras homolog gene family
1460235_at	3.98424	down	Scarb2	scavenger receptor class B
1449116_a_at	2.01527	down	Dtymk	deoxythymidylate kinase
1418522_at	2.02195	down	Mtx1	metaxin 1
1449119_at	2.22347	down	Arih2	ariadne homolog 2 (Drosophila)
1418528_a_at	3.22811	down	Dad1	defender against cell death 1
1418538_at	3.27839	down	Kdelr3	KDEL (Lys-Asp-Glu-Leu) endoplasmic reticulum protein retention receptor 3
1449128_at	2.53764	down	Ccdc43	coiled-coil domain containing 43
1418543_s_at	8.34645	down	Ccdc43	coiled-coil domain containing 43
1418560_at	3.77138	down	Pdha1	pyruvate dehydrogenase E1 alpha 1
1418563_at	2.23571	down	Serbp1	Serpine1 mRNA binding protein 1
1418574_a_at	2.37302	down	Shfm1	split hand/foot malformation (ectrodactyly) type 1
1418575_at	2.05081	down	Shfm1	split hand/foot malformation (ectrodactyly) type 1
1449144_at	2.59318	down	Gna11	guanine nucleotide binding protein
1418583_at	3.43476	down	Hint3	histidine triad nucleotide binding protein 3
1418631_at	2.24069	down	LOC100047093 /// Ube2h	similar to Ubiquitin-conjugating enzyme UbcH2 /// ubiquitin-conjugating enzyme E2H
1418656_at	3.5016	down	Lsm5	LSM5 homolog
1418711_at	2.38922	down	Pdgfa	platelet derived growth factor
1449187_at	8.06824	down	Pdgfa	platelet derived growth factor
1449189_at	2.12707	down	BC003266	cDNA sequence BC003266
1449194_at	2.19661	down	Mrps25	mitochondrial ribosomal protein S25
1451814_a_at	5.65746	down	Htatip2	HIV-1 tat interactive protein 2
1449210_at	2.96765	down	Igf2bp1	insulin-like growth factor 2 mRNA binding protein 1
1449211_at	2.23866	down	Bpnt1	bisphosphate 3'-nucleotidase 1
1418765_at	2.12832	down	Timd2	T-cell immunoglobulin and mucin domain containing 2
1418794_at	2.59839	down	Cds2	CDP-diacylglycerol synthase (phosphatidate cytidylyltransferase) 2
1418814_s_at	2.61209	down	Ndufa12	NADH dehydrogenase (ubiquinone) 1 alpha subcomplex
1449243_a_at	2.24248	down	Rps19	ribosomal protein S19
1418816_at	2.68146	down	Chmp1b	chromatin modifying protein 1B
1418817_at	2.14281	down	Chmp1b	chromatin modifying protein 1B
1428138_s_at	2.01463	down	Arl8b	ADP-ribosylation factor-like 8B
1418828_at	3.13477	down	Eri1	exoribonuclease 1
1418835_at	3.61327	down	Phlda1	pleckstrin homology-like domain
1455211_a_at	3.36617	down	Timm10 /// Timm13	translocase of inner mitochondrial membrane 10 homolog (yeast) /// translocase of inner mitochondrial membrane 13 homolog (yeast)
1418893_at	2.04404	down	Pbx2	pre B-cell leukemia transcription factor 2
1418905_at	2.8214	down	Nubp1	nucleotide binding protein 1
1418913_at	5.32515	down	Bhmt2	betaine-homocysteine methyltransferase 2
1418914_s_at	6.36878	down	Bhmt2	betaine-homocysteine methyltransferase 2
1426046_a_at	2.37828	down	Rabggta	Rab geranylgeranyl transferase
1449288_at	2.08785	down	Gdf3	growth differentiation factor 3
1449291_a_at	2.30444	down	Dcbld1	discoidin
1456109_a_at	2.01934	down	Mrps15	mitochondrial ribosomal protein S15
1449330_at	6.78335	down	Pdzd3	PDZ domain containing 3
1419106_at	5.31649	down	2210409E12Rik	RIKEN cDNA 2210409E12 gene
1449344_s_at	4.68141	down	2210409E12Rik	RIKEN cDNA 2210409E12 gene
1449349_at	2.67387	down	Nudt1	nudix (nucleoside diphosphate linked moiety X)-type motif 1
1449353_at	3.84016	down	Zmat3	zinc finger matrin type 3
1419130_at	2.95599	down	Adat2	adenosine deaminase
1460253_at	3.56816	down	Cmtm7	CKLF-like MARVEL transmembrane domain containing 7
1419260_a_at	3.91805	down	Snrpb	small nuclear ribonucleoprotein B
1419270_a_at	2.12195	down	Dut	deoxyuridine triphosphatase
1419287_at	2.65314	down	Tmem208	transmembrane protein 208
1419289_a_at	3.07051	down	Syngr1	synaptogyrin 1
1449412_at	4.0119	down	1810046J19Rik	RIKEN cDNA 1810046J19 gene
1419349_a_at	3.25451	down	Cyp2d9	cytochrome P450
1419384_at	2.30113	down	Pick1	protein interacting with C kinase 1
1419428_a_at	3.17777	down	Gaa	glucosidase
1419441_at	2.03148	down	Rplp0	ribosomal protein
1455168_a_at	2.44923	down	Gnb2l1	guanine nucleotide binding protein (G protein)
1419454_x_at	2.21484	down	Pias2	protein inhibitor of activated STAT 2
1419494_a_at	2.3014	down	Tpd52	tumor protein D52
1419509_a_at	2.98279	down	Nagk	N-acetylglucosamine kinase
1419562_at	2.39633	down	Birc6	baculoviral IAP repeat-containing 6
1419568_at	2.24548	down	Mapk1	mitogen-activated protein kinase 1
1419570_at	2.62563	down	Slc28a3	solute carrier family 28 (sodium-coupled nucleoside transporter)
1419571_at	2.57531	down	Slc28a3	solute carrier family 28 (sodium-coupled nucleoside transporter)
1426437_s_at	2.19311	down	Hdac3	histone deacetylase 3
1419633_at	2.09392	down	Uncx	UNC homeobox
1419655_at	2.26911	down	Tle3	transducin-like enhancer of split 3
1419659_s_at	3.07321	down	Chic2	cysteine-rich hydrophobic domain 2
1419734_at	2.35934	down	Actb	actin
1449575_a_at	4.52833	down	Gstp1	glutathione S-transferase
1419743_s_at	2.04927	down	Carm1	coactivator-associated arginine methyltransferase 1
1424877_a_at	3.16928	down	Alad /// LOC100046072	aminolevulinate
1419758_at	6.36446	down	Abcb1a	ATP-binding cassette
1419759_at	2.68224	down	Abcb1a	ATP-binding cassette
1449590_a_at	2.00043	down	Mras	muscle and microspikes RAS
1420381_a_at	2.08176	down	Rpl31	ribosomal protein L31
1449877_s_at	2.07933	down	Kifc1 /// LOC100044746	kinesin family member C1 /// similar to Kifc1 protein
1460274_at	3.09252	down	Tex19.2	testis expressed gene 19.2
1420471_at	2.13085	down	Hcrt	hypocretin
1420478_at	2.22322	down	Nap1l1	nucleosome assembly protein 1-like 1
1420498_a_at	4.05304	down	Dab2	disabled homolog 2 (Drosophila)
1420502_at	2.32648	down	Sat1	spermidine/spermine N1-acetyl transferase 1
1449888_at	5.08981	down	Epas1 /// LOC100048537	endothelial PAS domain protein 1 /// similar to Endothelial PAS domain protein 1
1449935_a_at	2.04074	down	Dnaja3	DnaJ (Hsp40) homolog
1420647_a_at	19.8916	down	Krt8	keratin 8
1420731_a_at	2.39371	down	Csrp2	cysteine and glycine-rich protein 2
1449973_a_at	2.45775	down	Pelp1	proline
1449980_a_at	2.38222	down	Gabrd	gamma-aminobutyric acid (GABA-A) receptor
1450012_x_at	2.89689	down	Ywhag	tyrosine 3-monooxygenase/tryptophan 5-monooxygenase activation protein
1450013_at	2.17933	down	2900073G15Rik	RIKEN cDNA 2900073G15 gene
1450017_at	2.62059	down	Ccng1	cyclin G1
1420827_a_at	5.21199	down	Ccng1	cyclin G1
1420842_at	2.79419	down	Ptprf	protein tyrosine phosphatase
1420843_at	2.33079	down	Ptprf	protein tyrosine phosphatase
1420879_a_at	2.21477	down	Ywhab	tyrosine 3-monooxygenase/tryptophan 5-monooxygenase activation protein
1436783_x_at	2.34242	down	Ywhab	tyrosine 3-monooxygenase/tryptophan 5-monooxygenase activation protein
1420880_a_at	2.94077	down	Ywhab	tyrosine 3-monooxygenase/tryptophan 5-monooxygenase activation protein
1420011_s_at	2.0528	down	Xbp1	X-box binding protein 1
1420900_a_at	2.42963	down	Rab18	RAB18
1420911_a_at	3.11501	down	Mfge8	milk fat globule-EGF factor 8 protein
1420913_at	5.98131	down	Slco2a1	solute carrier organic anion transporter family
1420920_a_at	2.02253	down	Arf1	ADP-ribosylation factor 1
1450048_a_at	3.57384	down	Idh2	isocitrate dehydrogenase 2 (NADP+)
1450186_s_at	3.03709	down	Gnas	GNAS (guanine nucleotide binding protein
1450084_s_at	2.18795	down	Ivns1abp	influenza virus NS1A binding protein
1429239_a_at	6.04637	down	Stard4	StAR-related lipid transfer (START) domain containing 4
1421029_a_at	2.01497	down	Hbs1l	Hbs1-like (S. cerevisiae)
1450099_a_at	2.58318	down	Gba	glucosidase
1450107_a_at	3.87359	down	Renbp	renin binding protein
1421059_a_at	2.10942	down	Alg2	asparagine-linked glycosylation 2 homolog (yeast
1421081_a_at	2.03967	down	Banf1	barrier to autointegration factor 1
1421082_s_at	5.1449	down	Banf1	barrier to autointegration factor 1
1452406_x_at	3.25256	down	Erdr1	erythroid differentiation regulator 1
1450138_a_at	3.4693	down	Serpinb6a	serine (or cysteine) peptidase inhibitor
1450150_a_at	2.36293	down	ENSMUSG00000059776 /// OTTMUSG00000009186 /// OTTMUSG00000025606 /// Rpl13	predicted gene
1421223_a_at	2.60596	down	Anxa4	annexin A4
1421260_a_at	2.20805	down	Srm	spermidine synthase
1421690_s_at	3.11973	down	Agrp	agouti related protein
1421750_a_at	2.0217	down	Vbp1	von Hippel-Lindau binding protein 1
1450372_a_at	2.52782	down	Rpl18	ribosomal protein L18
1421813_a_at	2.17375	down	Psap	prosaposin
1421821_at	2.24024	down	Ldlr	low density lipoprotein receptor
1421830_at	3.72687	down	Ak3l1 /// LOC100047616 /// OTTMUSG00000013175	adenylate kinase 3-like 1 /// similar to adenylate kinase 4 /// predicted gene
1450387_s_at	3.74917	down	Ak3l1 /// LOC100047616 /// OTTMUSG00000013175	adenylate kinase 3-like 1 /// similar to adenylate kinase 4 /// predicted gene
1421836_at	2.37748	down	Mtap7	microtubule-associated protein 7
1421840_at	2.03273	down	Abca1	ATP-binding cassette
1421841_at	2.60667	down	Fgfr3	fibroblast growth factor receptor 3
1421849_at	2.99708	down	Stag2	stromal antigen 2
1450407_a_at	2.23574	down	Anp32a	acidic (leucine-rich) nuclear phosphoprotein 32 family
1421947_at	2.01058	down	Gng12	guanine nucleotide binding protein (G protein)
1450460_at	5.31096	down	Aqp3	aquaporin 3
1422045_a_at	2.12009	down	Ptpn12	protein tyrosine phosphatase
1422071_at	3.08638	down	Lgals6	lectin
1422075_at	9.8141	down	Cdx2	caudal type homeo box 2
1460308_a_at	2.94897	down	Ict1	immature colon carcinoma transcript 1
1422128_at	2.67904	down	Rpl14	ribosomal protein L14
1426236_a_at	2.05139	down	Glul	glutamate-ammonia ligase (glutamine synthetase)
1422156_a_at	2.73977	down	EG546164 /// EG620248 /// EG667279 /// EG667846 /// LOC100043752 /// OTTMUSG00000002567 /// OTTMUSG00000006497 /// OTTMUSG00000017346 /// Rps2	predicted gene
1422264_s_at	2.53474	down	2310051E17Rik /// Klf9	RIKEN cDNA 2310051E17 gene /// Kruppel-like factor 9
1425891_a_at	5.63052	down	Grtp1	GH regulated TBC protein 1
1450561_a_at	2.05031	down	Surf1	surfeit gene 1
1422325_at	2.08816	down	Magea5	melanoma antigen
1436586_x_at	2.25655	down	Rps14	ribosomal protein S14
1422433_s_at	7.98667	down	Idh1	isocitrate dehydrogenase 1 (NADP+)
1450624_at	2.63276	down	Bhmt	betaine-homocysteine methyltransferase
1422439_a_at	5.58974	down	Cdk4 /// LOC640611	cyclin-dependent kinase 4 /// similar to Cell division protein kinase 4 (Cyclin-dependent kinase 4) (PSK-J3) (CRK3)
1422440_at	2.43914	down	Cdk4 /// LOC640611	cyclin-dependent kinase 4 /// similar to Cell division protein kinase 4 (Cyclin-dependent kinase 4) (PSK-J3) (CRK3)
1422441_x_at	3.11167	down	Cdk4	cyclin-dependent kinase 4
1450627_at	3.06809	down	Ank	progressive ankylosis
1422459_a_at	3.17852	down	Psmd13	proteasome (prosome
1422482_at	2.96032	down	Ruvbl2	RuvB-like protein 2
1422492_at	3.348	down	Cpox	coproporphyrinogen oxidase
1432016_a_at	2.42957	down	Idh3a	isocitrate dehydrogenase 3 (NAD+) alpha
1453572_a_at	7.26531	down	Plp2	proteolipid protein 2
1422506_a_at	3.48703	down	Cstb	cystatin B
1422507_at	2.21034	down	Cstb	cystatin B
1450635_at	2.30008	down	Akp5	alkaline phosphatase 5
1450638_at	2.73753	down	Pdcd5	programmed cell death 5
1422547_at	2.10328	down	Ranbp1	RAN binding protein 1
1422563_at	2.33295	down	Cr1l	complement component (3b/4b) receptor 1-like
1422567_at	4.44812	down	Fam129a	family with sequence similarity 129
1450668_s_at	2.13023	down	Hspe1	heat shock protein 1 (chaperonin 10)
1422612_at	3.38343	down	Hk2	hexokinase 2
1422614_s_at	2.0885	down	Bloc1s1	biogenesis of lysosome-related organelles complex-1
1422619_at	2.0622	down	Ppap2a	phosphatidic acid phosphatase 2a
1422620_s_at	2.11837	down	Ppap2a	phosphatidic acid phosphatase 2a
1422629_s_at	3.61603	down	Shroom3	shroom family member 3
1450700_at	8.70613	down	Cdc42ep3	CDC42 effector protein (Rho GTPase binding) 3
1422661_at	2.19784	down	Lgals8	lectin
1422697_s_at	6.18306	down	Jarid2	jumonji
1422698_s_at	6.08185	down	Jarid2	jumonji
1422712_a_at	2.55646	down	LOC100043681 /// LOC100044900 /// Ube2i	similar to Chain A
1450720_at	3.83897	down	Acp1	acid phosphatase 1
1422715_s_at	2.1902	down	Acp1 /// LOC631286	acid phosphatase 1
1422716_a_at	4.43029	down	Acp1 /// LOC631286	acid phosphatase 1
1450721_at	4.15659	down	Acp1 /// LOC631286	acid phosphatase 1
1422788_at	3.18789	down	Slc43a3	solute carrier family 43
1422796_at	2.71318	down	Prep	prolyl endopeptidase
1422819_at	2.76838	down	Mrpl36	mitochondrial ribosomal protein L36
1422851_at	10.0558	down	Hmga2	high mobility group AT-hook 2
1450780_s_at	6.10983	down	Hmga2	high mobility group AT-hook 2
1450781_at	7.50506	down	Hmga2	high mobility group AT-hook 2
1422855_at	2.04327	down	Cpsf3	cleavage and polyadenylation specificity factor 3
1422884_at	3.30605	down	Snrpd3	small nuclear ribonucleoprotein D3
1422887_a_at	2.01524	down	Ctbp2 /// Zranb1	C-terminal binding protein 2 /// zinc finger
1450793_at	2.97607	down	4930550L24Rik	RIKEN cDNA 4930550L24 gene
1423030_at	2.02235	down	Vcp	valosin containing protein
1423047_at	2.30662	down	Tollip	toll interacting protein
1450850_at	2.62158	down	Ezr /// LOC100044177	ezrin /// hypothetical protein LOC100044177
1450853_at	2.72183	down	Tle4	transducin-like enhancer of split 4
1423078_a_at	2.63026	down	Sc4mol	sterol-C4-methyl oxidase-like
1423086_at	3.32857	down	Npc1	Niemann Pick type C1
1423120_at	2.52829	down	Ide	insulin degrading enzyme
1450866_a_at	4.45106	down	Mrpl17	mitochondrial ribosomal protein L17
1450871_a_at	3.18747	down	Bcat1	branched chain aminotransferase 1
1423152_at	2.69835	down	Vapb	vesicle-associated membrane protein
1450881_s_at	2.73844	down	Gpr137b	G protein-coupled receptor 137B
1429775_a_at	3.64905	down	Gpr137b /// Gpr137b-ps /// LOC100044979	G protein-coupled receptor 137B /// G protein-coupled receptor 137B
1450882_s_at	2.51188	down	Gpr137b /// Gpr137b-ps /// LOC100044979	G protein-coupled receptor 137B /// G protein-coupled receptor 137B
1423168_at	2.13141	down	Mobkl3	MOB1
1423174_a_at	2.60268	down	Pard6b	par-6 (partitioning defective 6) homolog beta (C. elegans)
1423175_s_at	3.22637	down	Pard6b	par-6 (partitioning defective 6) homolog beta (C. elegans)
1450894_a_at	2.40935	down	Ap2m1	adaptor protein complex AP-2
1423188_a_at	2.74786	down	6720456B07Rik	RIKEN cDNA 6720456B07 gene
1423189_at	2.98825	down	6720456B07Rik	RIKEN cDNA 6720456B07 gene
1450903_at	2.7496	down	Rad23b	RAD23b homolog (S. cerevisiae)
1424222_s_at	2.25293	down	Rad23b	RAD23b homolog (S. cerevisiae)
1423215_at	2.0718	down	Spcs2	signal peptidase complex subunit 2 homolog (S. cerevisiae)
1423223_a_at	3.39145	down	Prdx6	peroxiredoxin 6
1450911_at	3.64456	down	Ppib	peptidylprolyl isomerase B
1450914_at	3.05772	down	Ppp1r14b	protein phosphatase 1
1423235_at	2.21281	down	Ap3b1	adaptor-related protein complex 3
1450921_at	2.3048	down	Aptx	aprataxin
1423256_a_at	3.06026	down	Atp6v1g1 /// EG666030	ATPase
1460330_at	2.70365	down	Anxa3	annexin A3
1423269_a_at	3.90277	down	Nedd4l	neural precursor cell expressed
1423296_at	2.38144	down	Psmd8	proteasome (prosome
1423317_at	2.09595	down	3110001D03Rik	RIKEN cDNA 3110001D03 gene
1423321_at	2.88029	down	Myadm	myeloid-associated differentiation marker
1423393_at	2.11038	down	Clic4	chloride intracellular channel 4 (mitochondrial)
1428263_a_at	2.36504	down	Tceb2	transcription elongation factor B (SIII)
1450995_at	2.81594	down	Folr1	folate receptor 1 (adult)
1423449_a_at	2.82015	down	Actn4	actinin alpha 4
1451002_at	2.03925	down	Aco2	aconitase 2
1451012_a_at	2.57794	down	Csda	cold shock domain protein A
1423521_at	4.80513	down	Lmnb1	lamin B1
1451021_a_at	2.47717	down	Klf5	Kruppel-like factor 5
1423567_a_at	3.07689	down	Psma7	proteasome (prosome
1423568_at	4.52112	down	Psma7	proteasome (prosome
1423589_at	2.58598	down	Arpc4	actin related protein 2/3 complex
1423625_a_at	4.52417	down	Dnajc19	DnaJ (Hsp40) homolog
1423645_a_at	2.65565	down	Ddx5	DEAD (Asp-Glu-Ala-Asp) box polypeptide 5
1423646_at	2.87466	down	Zdhhc3	zinc finger
1451071_a_at	12.3525	down	Atp1a1	ATPase
1423653_at	6.36261	down	Atp1a1	ATPase
1423657_at	3.49015	down	Cdipt	CDP-diacylglycerol--inositol 3-phosphatidyltransferase (phosphatidylinositol synthase)
1431125_a_at	2.34826	down	Tars2	threonyl-tRNA synthetase 2
1423677_at	2.2173	down	Fkbp9	FK506 binding protein 9
1423684_at	3.19354	down	Hnrnpk	heterogeneous nuclear ribonucleoprotein K
1423691_x_at	18.246	down	Krt8	keratin 8
1423692_at	3.68784	down	Ndufa8	NADH dehydrogenase (ubiquinone) 1 alpha subcomplex
1423694_at	2.41965	down	Kctd10	potassium channel tetramerisation domain containing 10
1423716_s_at	2.23757	down	Atp5d	ATP synthase
1423723_s_at	2.24096	down	Tardbp	TAR DNA binding protein
1423724_at	3.13382	down	Zwint	ZW10 interactor
1423730_at	2.18068	down	Clptm1l	CLPTM1-like
1423732_at	2.41322	down	Tram1	translocating chain-associating membrane protein 1
1451101_a_at	2.07758	down	ENSMUSG00000072940 /// OTTMUSG00000010817 /// Rps28	predicted gene
1423763_x_at	2.34482	down	ENSMUSG00000072940 /// Rps28	predicted gene
1423770_at	2.54977	down	Tmc6	transmembrane channel-like gene family 6
1423772_x_at	4.32839	down	Slc25a5	solute carrier family 25 (mitochondrial carrier
1451112_s_at	8.04298	down	Dap	death-associated protein
1423792_a_at	3.27288	down	Cmtm6	CKLF-like MARVEL transmembrane domain containing 6
1451114_at	2.50562	down	Cmtm6	CKLF-like MARVEL transmembrane domain containing 6
1423795_at	2.27694	down	Sfpq	splicing factor proline/glutamine rich (polypyrimidine tract binding protein associated)
1423796_at	3.88511	down	Sfpq	splicing factor proline/glutamine rich (polypyrimidine tract binding protein associated)
1423797_at	2.90315	down	Aacs	acetoacetyl-CoA synthetase
1423804_a_at	2.51102	down	Idi1	isopentenyl-diphosphate delta isomerase
1420046_s_at	2.29364	down	Maf1	MAF1 homolog (S. cerevisiae)
1423819_s_at	2.0097	down	Arl6ip1	ADP-ribosylation factor-like 6 interacting protein 1
1451134_a_at	2.31516	down	Tm2d2	TM2 domain containing 2
1423829_at	2.36966	down	Fam49b	family with sequence similarity 49
1419812_s_at	4.91155	down	Ccdc56	coiled-coil domain containing 56
1451148_at	2.57958	down	LOC100047214 /// Pink1	similar to PTEN induced putative kinase 1 /// PTEN induced putative kinase 1
1423857_at	3.13627	down	Mrpl30	mitochondrial ribosomal protein L30
1426083_a_at	2.19811	down	Btg1 /// LOC100047353	B-cell translocation gene 1
1423881_at	3.0932	down	Saps3	SAPS domain family
1451152_a_at	2.69044	down	Atp1b1	ATPase
1423890_x_at	2.55764	down	Atp1b1	ATPase
1451162_at	2.14354	down	Hsbp1	heat shock factor binding protein 1
1451164_a_at	2.0739	down	Mrps18b	mitochondrial ribosomal protein S18B
1423916_s_at	2.11644	down	LOC100048413 /// Mlf2	similar to Myeloid leukemia factor 2 /// myeloid leukemia factor 2
1423917_a_at	2.15605	down	Cttn	cortactin
1451175_at	3.53796	down	Spcs3	signal peptidase complex subunit 3 homolog (S. cerevisiae)
1423933_a_at	2.79109	down	1600029D21Rik	RIKEN cDNA 1600029D21 gene
1451180_a_at	2.0409	down	Nt5c3l	5'-nucleotidase
1423939_a_at	2.37663	down	Yif1a	Yip1 interacting factor homolog A (S. cerevisiae)
1459890_s_at	2.23843	down	1110008P14Rik	RIKEN cDNA 1110008P14 gene
1423955_a_at	2.05501	down	Lass2	LAG1 homolog
1423960_at	5.78949	down	Lpcat3	lysophosphatidylcholine acyltransferase 3
1423969_at	2.45033	down	Nup37	nucleoporin 37
1423985_at	2.35408	down	Gng5 /// LOC100043507 /// LOC100048410	guanine nucleotide binding protein (G protein)
1423993_at	2.74169	down	Atp6v1f	ATPase
1451199_at	2.24025	down	Qtrtd1	queuine tRNA-ribosyltransferase domain containing 1
1424002_at	3.61625	down	Pdcl3	phosducin-like 3
1460349_at	2.16793	down	Prr14	proline rich 14
1424033_at	2.002	down	Sfrs7	splicing factor
1424038_a_at	5.48059	down	2310044H10Rik	RIKEN cDNA 2310044H10 gene
1424048_a_at	2.31792	down	Cyb5r1	cytochrome b5 reductase 1
1424056_at	3.53369	down	Usp48	ubiquitin specific peptidase 48
1424058_at	2.06383	down	Prrc1	proline-rich coiled-coil 1
1451219_at	2.78073	down	Ormdl1	ORM1-like 1 (S. cerevisiae)
1424075_at	2.02456	down	9430016H08Rik	RIKEN cDNA 9430016H08 gene
1424980_s_at	2.88358	down	Aph1a	anterior pharynx defective 1a homolog (C. elegans)
1424085_at	2.66225	down	Ndufa4	NADH dehydrogenase (ubiquinone) 1 alpha subcomplex
1451228_a_at	2.79401	down	Sycn	syncollin
1425788_a_at	4.86276	down	Echdc2	enoyl Coenzyme A hydratase domain containing 2
1451232_at	3.34721	down	Cd151	CD151 antigen
1424093_x_at	3.233	down	Cd151	CD151 antigen
1451240_a_at	2.97148	down	Glo1	glyoxalase 1
1424110_a_at	2.63568	down	LOC100046344 /// Nme1	similar to Nucleoside diphosphate kinase A (NDK A) (NDP kinase A) (Tumor metastatic process-associated protein) (Metastasis inhibition factor NM23) (NDPK-A) (nm23-M1) /// non-metastatic cells 1
1424119_at	2.1359	down	Prkab1	protein kinase
1424121_at	3.15653	down	Commd1	COMM domain containing 1
1424123_at	4.0351	down	Mfsd7c	major facilitator superfamily domain containing 7C
1460351_at	2.16019	down	S100a11	S100 calcium binding protein A11 (calgizzarin)
1451247_at	2.42083	down	Mfsd1	major facilitator superfamily domain containing 1
1424129_at	2.6288	down	Mfsd1	major facilitator superfamily domain containing 1
1455456_a_at	2.77217	down	Timm50	translocase of inner mitochondrial membrane 50 homolog (yeast)
1424138_at	2.65692	down	Rhbdf1	rhomboid family 1 (Drosophila)
1424139_at	2.04436	down	Rap1a	RAS-related protein-1a
1451259_at	2.62248	down	Rexo2	REX2
1424159_at	2.21257	down	Fam134c	family with sequence similarity 134
1424165_a_at	3.16953	down	Sharpin	SHANK-associated RH domain interacting protein
1424167_a_at	4.29131	down	Pmm1	phosphomannomutase 1
1424168_a_at	4.72062	down	Capzb	capping protein (actin filament) muscle Z-line
1435522_a_at	2.18921	down	2310016E02Rik	RIKEN cDNA 2310016E02 gene
1428709_a_at	2.96704	down	Mrpl24	mitochondrial ribosomal protein L24
1424174_at	2.28719	down	Shkbp1	Sh3kbp1 binding protein 1
1424184_at	2.40209	down	Acadvl	acyl-Coenzyme A dehydrogenase
1451272_a_at	2.16851	down	Ube2f	ubiquitin-conjugating enzyme E2F (putative)
1424200_s_at	2.2832	down	Seh1l	SEH1-like (S. cerevisiae
1460354_a_at	2.37768	down	Mrpl13	mitochondrial ribosomal protein L13
1424239_at	2.4001	down	Fam65a	family with sequence similarity 65
1424269_a_at	2.44508	down	EG433297 /// EG667952 /// Myl6	predicted gene
1451290_at	2.22539	down	Map1lc3a	microtubule-associated protein 1 light chain 3 alpha
1451297_at	6.73683	down	Gulo	gulonolactone (L-) oxidase
1424283_at	2.08213	down	Jtb	jumping translocation breakpoint
1424294_at	3.04954	down	Ppp4r1	protein phosphatase 4
1424313_a_at	2.46193	down	Ndufs7	NADH dehydrogenase (ubiquinone) Fe-S protein 7
1451312_at	2.15728	down	Ndufs7	NADH dehydrogenase (ubiquinone) Fe-S protein 7
1451313_a_at	2.70211	down	1110067D22Rik	RIKEN cDNA 1110067D22 gene
1424346_at	2.06634	down	Ppp6c	protein phosphatase 6
1424347_at	2.13185	down	Ppp6c	protein phosphatase 6
1451327_a_at	2.42967	down	Tmed1	transmembrane emp24 domain containing 1
1424353_at	2.10936	down	Lrpprc	leucine-rich PPR-motif containing
1424378_at	3.46492	down	Ldlrap1	low density lipoprotein receptor adaptor protein 1
1451339_at	2.1922	down	Suox	sulfite oxidase
1424427_at	2.97377	down	Tada1l	transcriptional adaptor 1 (HFI1 homolog
1451352_s_at	3.85286	down	Mta3	metastasis associated 3
1451355_at	2.22442	down	Acer2	alkaline ceramidase 2
1424451_at	3.67223	down	Acaa1a /// Acaa1b	acetyl-Coenzyme A acyltransferase 1A /// acetyl-Coenzyme A acyltransferase 1B
1424456_at	2.52485	down	Pvrl2	poliovirus receptor-related 2
1451362_at	4.13695	down	Rab7l1	RAB7
1451366_at	2.00534	down	Cops6	COP9 (constitutive photomorphogenic) homolog
1451368_at	4.46605	down	Alg1	asparagine-linked glycosylation 1 homolog (yeast
1424489_a_at	2.17879	down	Trit1	tRNA isopentenyltransferase 1
1451377_a_at	2.4676	down	Aaas	achalasia
1451378_at	2.45812	down	Utp6	UTP6
1424519_at	2.79318	down	Mtg1	mitochondrial GTPase 1 homolog (S. cerevisiae)
1424562_a_at	2.9439	down	Slc25a4	solute carrier family 25 (mitochondrial carrier
1455069_x_at	2.86049	down	Slc25a4	solute carrier family 25 (mitochondrial carrier
1434897_a_at	2.82843	down	Slc25a4	solute carrier family 25 (mitochondrial carrier
1424619_at	2.00324	down	Sf3b4	splicing factor 3b
1424638_at	3.16557	down	Cdkn1a	cyclin-dependent kinase inhibitor 1A (P21)
1451425_a_at	2.65741	down	Mkrn1	makorin
1424650_at	4.98984	down	Pdia5	protein disulfide isomerase associated 5
1424671_at	2.22147	down	Plekhf1	pleckstrin homology domain containing
1424684_at	3.27318	down	Rab5c	RAB5C
1424685_at	3.06468	down	Exosc4	exosome component 4
1428847_a_at	2.74401	down	Macf1	microtubule-actin crosslinking factor 1
1449677_s_at	2.32165	down	Tmem38b	transmembrane protein 38B
1424723_s_at	2.20633	down	Cstf3	cleavage stimulation factor
1424732_s_at	2.03592	down	Tmem192	transmembrane protein 192
1424736_at	2.34337	down	Eef2	eukaryotic translation elongation factor 2
1424749_at	2.31173	down	Wdfy1	WD repeat and FYVE domain containing 1
1451474_a_at	2.06702	down	Parp8	poly (ADP-ribose) polymerase family
1453731_a_at	4.82857	down	Tmem77	transmembrane protein 77
1451754_a_at	2.15538	down	Wdr45	WD repeat domain 45
1424786_s_at	2.09543	down	Wdr45	WD repeat domain 45
1424801_at	2.90034	down	Enah	enabled homolog (Drosophila)
1451536_at	2.39419	down	Mtfr1	mitochondrial fission regulator 1
1424991_s_at	6.48911	down	Tyms /// Tyms-ps	thymidylate synthase /// thymidylate synthase
1425011_x_at	2.24394	down	Stx18	syntaxin 18
1425018_at	2.11043	down	Mcts1	malignant T cell amplified sequence 1
1425029_a_at	2.11994	down	Mboat2	membrane bound O-acyltransferase domain containing 2
1425068_a_at	2.31881	down	Tex264	testis expressed gene 264
1451594_s_at	2.67489	down	Serpinb6c	serine (or cysteine) peptidase inhibitor
1425140_at	2.63679	down	Lactb2	lactamase
1425196_a_at	2.10882	down	Hint2	histidine triad nucleotide binding protein 2
1451626_x_at	2.14291	down
1451630_at	3.36817	down	Ttl	tubulin tyrosine ligase
1425323_a_at	2.44283	down	Fam173a	family with sequence similarity 173
1425350_a_at	2.37945	down	Myef2	myelin basic protein expression factor 2
1451700_a_at	2.47929	down	1110007L15Rik	RIKEN cDNA 1110007L15 gene
1425420_s_at	3.73151	down	Lats2	large tumor suppressor 2
1425463_at	2.25897	down	Gata6	GATA binding protein 6
1425464_at	7.64172	down	Gata6	GATA binding protein 6
1451731_at	2.17256	down	Abca3	ATP-binding cassette
1460378_a_at	2.1456	down	Tes	testis derived transcript
1451736_a_at	3.11176	down	Map2k7	mitogen-activated protein kinase kinase 7
1451745_a_at	2.15758	down	Znhit1	zinc finger
1425536_at	5.11095	down	Stx3	syntaxin 3
1430776_s_at	2.03015	down	Ankrd24	ankyrin repeat domain 24
1452676_a_at	2.2971	down	LOC100044383 /// Pnpt1	similar to polynucleotide phosphorylase-like protein /// polyribonucleotide nucleotidyltransferase 1
1455201_x_at	2.03759	down	Apoa1	apolipoprotein A-I
1435323_a_at	2.19618	down	Mboat1	membrane bound O-acyltransferase domain containing 1
1426146_a_at	2.05261	down	Chpt1	choline phosphotransferase 1
1451988_s_at	2.45307	down	Chmp4b /// LOC674706	chromatin modifying protein 4B /// similar to zinc finger protein 341
1426247_at	2.61079	down	Stk24	serine/threonine kinase 24 (STE20 homolog
1426248_at	4.11515	down	Stk24	serine/threonine kinase 24 (STE20 homolog
1452000_s_at	4.56808	down	Sars	seryl-aminoacyl-tRNA synthetase
1452003_at	2.44081	down	Rbm14	RNA binding motif protein 14
1426264_at	2.26113	down	Dlat	dihydrolipoamide S-acetyltransferase (E2 component of pyruvate dehydrogenase complex)
1426265_x_at	2.688	down	Dlat	dihydrolipoamide S-acetyltransferase (E2 component of pyruvate dehydrogenase complex)
1426269_at	2.31885	down	Vamp7	vesicle-associated membrane protein 7
1452032_at	3.07693	down	Prkar1a	protein kinase
1426355_a_at	3.46163	down	6330578E17Rik	RIKEN cDNA 6330578E17 gene
1426356_at	2.45187	down	6330578E17Rik	RIKEN cDNA 6330578E17 gene
1452042_a_at	2.09524	down	Tmem144	transmembrane protein 144
1426386_at	2.11338	down	Rpl7l1	ribosomal protein L7-like 1
1426390_a_at	2.39413	down	Arf1	ADP-ribosylation factor 1
1452053_a_at	2.06228	down	Tmem33	transmembrane protein 33
1452062_at	2.02243	down	Prpsap2	phosphoribosyl pyrophosphate synthetase-associated protein 2
1426438_at	2.82203	down	Ddx3y	DEAD (Asp-Glu-Ala-Asp) box polypeptide 3
1426441_at	2.35664	down	Slc11a2	solute carrier family 11 (proton-coupled divalent metal ion transporters)
1426529_a_at	2.28932	down	Tagln2	transgelin 2
1426581_at	3.31153	down	Ptpmt1	protein tyrosine phosphatase
1426584_a_at	2.09403	down	Sord	sorbitol dehydrogenase
1452123_s_at	4.19456	down	Frmd4b	FERM domain containing 4B
1426599_a_at	4.04733	down	Slc2a1	solute carrier family 2 (facilitated glucose transporter)
1452128_a_at	2.2377	down	Brcc3	BRCA1/BRCA2-containing complex
1452130_at	2.21352	down	EG433144 /// LOC100048541 /// Txndc14	predicted gene
1426643_at	3.37603	down	Elp3	elongation protein 3 homolog (S. cerevisiae)
1437497_a_at	3.80216	down	Hsp90aa1	heat shock protein 90
1426657_s_at	3.90888	down	EG666036 /// EG666422 /// EG666875 /// EG668576 /// Phgdh	predicted gene
1426688_at	2.19038	down	Sdha	succinate dehydrogenase complex
1426689_s_at	2.35453	down	Sdha	succinate dehydrogenase complex
1452146_a_at	3.00469	down	Cox15	COX15 homolog
1426693_x_at	2.29573	down	Cox15	COX15 homolog
1426694_at	2.73713	down	9030624J02Rik	RIKEN cDNA 9030624J02 gene
1436609_a_at	12.8491	down	Lrpap1	low density lipoprotein receptor-related protein associated protein 1
1426696_at	13.9892	down	Lrpap1	low density lipoprotein receptor-related protein associated protein 1
1426697_a_at	6.81059	down	Lrpap1	low density lipoprotein receptor-related protein associated protein 1
1452148_at	10.5975	down	Lrpap1	low density lipoprotein receptor-related protein associated protein 1
1426715_s_at	3.96596	down	Slc46a1	solute carrier family 46
1426750_at	2.21899	down	Flnb	filamin
1426780_at	2.26726	down	D14Ertd436e	DNA segment
1426801_at	2.23982	down	2004-09-08	septin 8
1426802_at	2.03157	down	2004-09-08	septin 8
1426819_at	2.22979	down
1452213_at	2.74078	down	Tex2	testis expressed gene 2
1452222_at	3.07769	down	Utrn	utrophin
1452226_at	5.18183	down	LOC100047340 /// Rcc2	hypothetical protein LOC100047340 /// regulator of chromosome condensation 2
1426905_a_at	5.16439	down	Dnajc10 /// LOC100047007	DnaJ (Hsp40) homolog
1426918_at	2.44123	down	Itgb1	integrin beta 1 (fibronectin receptor beta)
1426926_at	2.02424	down	Plcg2	phospholipase C
1426933_at	2.05719	down	Oxsr1	oxidative-stress responsive 1
1426940_at	2.51485	down	Sidt2	SID1 transmembrane family
1452247_at	2.3153	down	Fxr1	fragile X mental retardation gene 1
1452254_at	2.04772	down	Mtmr9	myotubularin related protein 9
1452257_at	4.03414	down	Bdh1	3-hydroxybutyrate dehydrogenase
1452283_at	3.9433	down	Rassf8	Ras association (RalGDS/AF-6) domain family (N-terminal) member 8
1427017_at	2.72266	down	Satb2	special AT-rich sequence binding protein 2
1427058_at	2.88064	down	Eif4a1	eukaryotic translation initiation factor 4A1
1427085_at	2.42463	down	2810432D09Rik	RIKEN cDNA 2810432D09 gene
1427113_s_at	2.0298	down	Ttl	tubulin tyrosine ligase
1452311_at	2.28502	down	Dmgdh	dimethylglycine dehydrogenase precursor
1452320_at	4.91338	down	Lrp2	low density lipoprotein receptor-related protein 2
1427153_at	2.36392	down	Bckdhb	branched chain ketoacid dehydrogenase E1
1427263_at	14.3355	down	Xist	inactive X specific transcripts
1452395_at	3.30497	down	Med19	mediator of RNA polymerase II transcription
1427339_at	5.15285	down	Slc30a2	solute carrier family 30 (zinc transporter)
1427386_at	4.33107	down	Arhgef16	Rho guanine nucleotide exchange factor (GEF) 16
1452422_a_at	2.24618	down	Snrpb2	U2 small nuclear ribonucleoprotein B
1427439_s_at	2.2914	down	Prmt5	protein arginine N-methyltransferase 5
1452446_a_at	2.14148	down	Tmub2	transmembrane and ubiquitin-like domain containing 2
1427539_a_at	3.61366	down	Zwint	ZW10 interactor
1427544_a_at	2.46367	down	Papola	poly (A) polymerase alpha
1427820_at	6.78148	down
1427875_a_at	2.57901	down	100043876 /// ENSMUSG00000066116 /// LOC100048552 /// Rpl34	predicted gene
1430326_s_at	2.93233	down	Uqcrq	ubiquinol-cytochrome c reductase
1427888_a_at	2.69647	down	Spna2	spectrin alpha 2
1427889_at	3.19142	down	Spna2	spectrin alpha 2
1427893_a_at	2.19579	down	Pmvk	phosphomevalonate kinase
1452584_at	2.56464	down	1500032L24Rik	RIKEN cDNA 1500032L24 gene
1452585_at	2.02971	down	Mrps28	mitochondrial ribosomal protein S28
1452590_a_at	2.02431	down	ENSMUSG00000043248 /// ENSMUSG00000072674 /// Plac9	predicted gene
1427912_at	2.10359	down	Cbr3	carbonyl reductase 3
1452593_a_at	2.15177	down	LOC100045866 /// Tceb1	similar to elongation factor SIII p15 subunit /// transcription elongation factor B (SIII)
1427915_s_at	2.69524	down	LOC100045866 /// Tceb1	similar to elongation factor SIII p15 subunit /// transcription elongation factor B (SIII)
1452594_at	3.64247	down	Dusp11	dual specificity phosphatase 11 (RNA/RNP complex 1-interacting)
1427933_at	2.6601	down	Vps33b	vacuolar protein sorting 33B (yeast)
1452637_a_at	2.13511	down	Bola1	bolA-like 1 (E. coli)
1428025_s_at	2.12126	down	Pitpnc1	phosphatidylinositol transfer protein
1428074_at	2.27999	down	Tmem158	transmembrane protein 158
1428075_at	3.85593	down	100041273 /// 100042503 /// Ndufb4	predicted gene
1428080_at	2.32729	down	Pgam5	phosphoglycerate mutase family member 5
1428083_at	3.33141	down	2310043N10Rik	RIKEN cDNA 2310043N10 gene
1428085_at	3.81606	down	1110057K04Rik	RIKEN cDNA 1110057K04 gene
1460429_at	2.23636	down	Cdc5l	cell division cycle 5-like (S. pombe)
1428116_a_at	2.10583	down	Dynlt1 /// Dynlt1d /// Dynlt1e /// ENSMUSG00000056252 /// LOC100040531 /// LOC100040563	dynein light chain Tctex-type 1 /// dynein light chain Tctex-type 1D /// dynein light chain Tctex-type 1E /// predicted gene
1452671_s_at	3.19133	down	Lman1	lectin
1428132_at	2.5308	down	Cdc42se1	CDC42 small effector 1
1428141_at	3.18015	down	Gga2	golgi associated
1428146_s_at	3.89284	down	Acaa2	acetyl-Coenzyme A acyltransferase 2 (mitochondrial 3-oxoacyl-Coenzyme A thiolase)
1452680_at	2.35829	down	Snrpd2	small nuclear ribonucleoprotein D2
1437859_x_at	2.92232	down	Eif5a	eukaryotic translation initiation factor 5A
1452681_at	2.20478	down	Dtymk	deoxythymidylate kinase
1428163_at	2.34432	down	Sar1b	SAR1 gene homolog B (S. cerevisiae)
1452692_a_at	2.38369	down	Ndufv2	NADH dehydrogenase (ubiquinone) flavoprotein 2
1428181_at	2.40123	down	Etfb	electron transferring flavoprotein
1428188_at	2.05934	down	2610019A05Rik	RIKEN cDNA 2610019A05 gene
1428212_x_at	2.2426	down	EG665562 /// EG667682 /// ENSMUSG00000066956 /// LOC638399 /// LOC673582 /// LOC675018 /// Rpl31	predicted gene
1428214_at	2.18387	down	Tomm7	translocase of outer mitochondrial membrane 7 homolog (yeast)
1428215_x_at	2.05398	down	Tomm7	translocase of outer mitochondrial membrane 7 homolog (yeast)
1428257_s_at	2.38712	down	Dynlrb1	dynein light chain roadblock-type 1
1452713_a_at	3.40914	down	Snrnp40	small nuclear ribonucleoprotein 40 (U5)
1428264_at	2.4776	down	Snrnp40	small nuclear ribonucleoprotein 40 (U5)
1428283_at	3.05465	down	Cyp2s1	cytochrome P450
1452721_a_at	2.73695	down	Ccdc53	coiled-coil domain containing 53
1452730_at	2.05434	down	Rps4y2	ribosomal protein S4
1452734_at	9.22495	down	Gm1604A /// Gm1604b /// Rnaset2a /// Rnaset2b	gene model 1604A
1452736_at	2.30196	down	R3hcc1	R3H domain and coiled-coil containing 1
1428322_a_at	2.52303	down	Ndufb10	NADH dehydrogenase (ubiquinone) 1 beta subcomplex
1428357_at	5.50019	down	2610019F03Rik	RIKEN cDNA 2610019F03 gene
1428367_at	2.13425	down	Ndst1	N-deacetylase/N-sulfotransferase (heparan glucosaminyl) 1
1428464_at	2.22774	down	Ndufa3	NADH dehydrogenase (ubiquinone) 1 alpha subcomplex
1452790_x_at	2.50569	down	Ndufa3	NADH dehydrogenase (ubiquinone) 1 alpha subcomplex
1428465_at	2.59005	down	Tmem147	transmembrane protein 147
1428526_at	2.02697	down	Lsmd1	LSM domain containing 1
1428529_at	2.28059	down	2810026P18Rik	RIKEN cDNA 2810026P18 gene
1428552_at	2.30504	down	2610001J05Rik	RIKEN cDNA 2610001J05 gene
1428585_at	8.51984	down	Actn1	actinin
1428608_at	2.2491	down	Mylc2b	myosin light chain
1428612_at	2.42188	down	Atg7	autophagy-related 7 (yeast)
1428752_at	2.94609	down	Slc5a11	solute carrier family 5 (sodium/glucose cotransporter)
1428772_at	8.99836	down	Xpot	exportin
1428797_at	2.36208	down	Setd6	SET domain containing 6
1435869_s_at	2.94835	down	Ap2a2	adaptor protein complex AP-2
1428874_at	3.04395	down	Fam96b	family with sequence similarity 96
1428935_at	3.82977	down	Canx	calnexin
1429038_at	2.80418	down	Dda1	DET1 and DDB1 associated 1
1452997_at	3.20538	down	6820431F20Rik	RIKEN cDNA 6820431F20 gene
1429041_at	4.65671	down	6820431F20Rik	RIKEN cDNA 6820431F20 gene
1429054_at	2.24993	down	Mrpl47	mitochondrial ribosomal protein L47
1453015_at	2.6087	down	4933407C03Rik	RIKEN cDNA 4933407C03 gene
1429183_at	2.02202	down	Pkp2	plakophilin 2
1429252_at	2.20637	down	0610010K14Rik	RIKEN cDNA 0610010K14 gene
1429291_at	2.00023	down	Psmd1	proteasome (prosome
1453096_x_at	2.29332	down	EG621100 /// EG622236 /// OTTMUSG00000001643 /// Rpl27	predicted gene
1429328_at	3.61918	down	Nsfl1c	NSFL1 (p97) cofactor (p47)
1429483_at	2.18048	down	Calcoco2	calcium binding and coiled-coil domain 2
1453343_s_at	2.15658	down	Vrk2	vaccinia related kinase 2
1430295_at	2.12602	down	Gna13	guanine nucleotide binding protein
1430542_a_at	6.47207	down	EG433923 /// EG667030 /// Slc25a5	predicted gene
1430780_a_at	5.39935	down	Pmm1	phosphomannomutase 1
1430980_a_at	2.35606	down	Eif4a1	eukaryotic translation initiation factor 4A1
1431765_a_at	2.23567	down	EG243642 /// EG546164 /// EG620248 /// EG621842 /// EG622795 /// EG623466 /// EG634678 /// EG666668 /// EG666682 /// EG667216 /// EG667279 /// LOC100043752 /// LOC100048354 /// LOC634916 /// LOC639606 /// OTTMUSG00000002567 /// OTTMUSG00000003370 /// OTTM	predicted gene
1432007_s_at	2.63318	down	Ap2a2	adaptor protein complex AP-2
1433428_x_at	3.20283	down	Tgm2	transglutaminase 2
1433461_at	2.1811	down	Sf3b2	splicing factor 3b
1460541_at	2.05116	down	Slc7a6	solute carrier family 7 (cationic amino acid transporter
1437052_s_at	3.16637	down	Slc2a3	solute carrier family 2 (facilitated glucose transporter)
1455898_x_at	3.18182	down	Slc2a3	solute carrier family 2 (facilitated glucose transporter)
1433486_at	2.08406	down	Clcn3	chloride channel 3
1433488_x_at	3.1704	down	Gns	glucosamine (N-acetyl)-6-sulfatase
1433509_s_at	4.65324	down	Reep1	receptor accessory protein 1
1433510_x_at	2.20666	down	100043718 /// LOC100048508 /// OTTMUSG00000012957 /// Rpl36	predicted gene
1433513_x_at	4.56266	down	Ndufa12	NADH dehydrogenase (ubiquinone) 1 alpha subcomplex
1433519_at	5.27703	down	Nucks1	nuclear casein kinase and cyclin-dependent kinase substrate 1
1433521_at	2.39556	down	Ankrd13c	ankyrin repeat domain 13c
1454636_at	2.17646	down	Cbx5	chromobox homolog 5 (Drosophila HP1a)
1433546_at	2.01796	down	Gns	glucosamine (N-acetyl)-6-sulfatase
1454661_at	2.19948	down	Atp5g3	ATP synthase
1433579_at	2.18025	down	Tmem30b	transmembrane protein 30B
1433603_at	6.23601	down	Ndufs6	NADH dehydrogenase (ubiquinone) Fe-S protein 6
1433604_x_at	4.20277	down	Aldoa	aldolase A
1433612_at	2.93413	down	Ap2s1	adaptor-related protein complex 2
1460545_at	2.19102	down	Thrap3	thyroid hormone receptor associated protein 3
1438606_a_at	3.50686	down	Clic4	chloride intracellular channel 4 (mitochondrial)
1433666_s_at	2.40502	down	Vps41	vacuolar protein sorting 41 (yeast)
1454678_s_at	4.01359	down	A130022J15Rik	RIKEN cDNA A130022J15 gene
1433674_a_at	2.91425	down	Snhg1	small nucleolar RNA host gene (non-protein coding) 1
1433675_at	2.07356	down	Snhg1	small nucleolar RNA host gene (non-protein coding) 1
1454688_x_at	2.05058	down	Tmed10	transmembrane emp24-like trafficking protein 10 (yeast)
1433689_s_at	3.1738	down	Rps9	ribosomal protein S9
1433693_x_at	2.48055	down	Vamp3	vesicle-associated membrane protein 3
1460547_a_at	2.26015	down	Hnrnpk	heterogeneous nuclear ribonucleoprotein K
1454696_at	2.30149	down	Gnb1	guanine nucleotide binding protein (G protein)
1436924_x_at	2.06042	down	EG665562 /// EG667682 /// EG668850 /// ENSMUSG00000066956 /// Ero1l /// LOC638399 /// LOC673582 /// LOC675018 /// OTTMUSG00000009823 /// Rpl31	predicted gene
1433708_at	2.54612	down	Srp68	signal recognition particle 68
1454703_x_at	2.08129	down	Snhg1	small nucleolar RNA host gene (non-protein coding) 1
1433720_s_at	2.4519	down	Chchd10	coiled-coil-helix-coiled-coil-helix domain containing 10
1454704_at	4.08305	down	Scarb2	scavenger receptor class B
1433756_at	3.45616	down	S100pbp	S100P binding protein
1433799_at	2.69477	down	Rdh13	retinol dehydrogenase 13 (all-trans and 9-cis)
1433866_x_at	2.30549	down	Prdx1	peroxiredoxin 1
1433883_at	7.32006	down	Tpm4	tropomyosin 4
1433916_at	2.84768	down	Vamp3	vesicle-associated membrane protein 3
1454773_at	3.00395	down	Rxra	retinoid X receptor alpha
1454778_x_at	2.23981	down	ENSMUSG00000072940 /// Rps28	predicted gene
1433940_at	2.26061	down	LOC100048812 /// Spag7	hypothetical protein LOC100048812 /// sperm associated antigen 7
1454785_at	2.711	down	Dusp11	dual specificity phosphatase 11 (RNA/RNP complex 1-interacting)
1434003_a_at	3.17712	down	Dhps	deoxyhypusine synthase
1434004_at	2.05717	down	Dhps	deoxyhypusine synthase
1434019_at	2.36985	down	Pdap1	PDGFA associated protein 1
1454860_x_at	3.9447	down	Dad1	defender against cell death 1
1434162_at	2.44115	down	2700078E11Rik	RIKEN cDNA 2700078E11 gene
1460561_x_at	2.14552	down	Sepw1	selenoprotein W
1454890_at	6.54348	down	Amot	angiomotin
1434256_s_at	2.18729	down	Cds2	CDP-diacylglycerol synthase (phosphatidate cytidylyltransferase) 2
1434272_at	2.97012	down	Cpeb2	cytoplasmic polyadenylation element binding protein 2
1434278_at	2.10254	down	Mtm1	X-linked myotubular myopathy gene 1
1454925_x_at	2.42115	down	Mdh1	malate dehydrogenase 1
1434328_at	3.10556	down	Rpl15	ribosomal protein L15
1434343_at	2.30515	down	5730403M16Rik	RIKEN cDNA 5730403M16 gene
1434356_a_at	2.07447	down	Psma5	proteasome (prosome
1434369_a_at	3.2978	down	Cryab	crystallin
1434396_a_at	2.88594	down	EG433297 /// EG667952 /// Myl6	predicted gene
1434419_s_at	2.19651	down	Tardbp	TAR DNA binding protein
1434491_a_at	2.56978	down	Cox6c	cytochrome c oxidase
1434555_at	3.70309	down	Anp32a	acidic (leucine-rich) nuclear phosphoprotein 32 family
1434557_at	2.96102	down	Hip1	huntingtin interacting protein 1
1434599_a_at	2.12897	down	Tjp2	tight junction protein 2
1434600_at	2.78201	down	Tjp2	tight junction protein 2
1419835_s_at	3.33678	down	Plec1	plectin 1
1434614_at	2.15433	down
1434615_x_at	3.27723	down
1455036_s_at	4.97918	down	LOC675851 /// Ndufc2	similar to NADH dehydrogenase (ubiquinone) 1
1434642_at	2.80719	down	Hsd17b11	hydroxysteroid (17-beta) dehydrogenase 11
1455042_at	3.56799	down
1434705_at	2.31301	down	Ctbp2	C-terminal binding protein 2
1434731_x_at	2.10665	down	Prdx1	peroxiredoxin 1
1455084_x_at	2.53358	down	Shmt2	serine hydroxymethyltransferase 2 (mitochondrial)
1434739_at	2.51343	down	Fmr1nb	fragile X mental retardation 1 neighbor
1434773_a_at	6.0437	down	Slc2a1	solute carrier family 2 (facilitated glucose transporter)
1434799_x_at	4.34922	down	Aldoa	aldolase A
1434801_x_at	5.1984	down	Slc25a5	solute carrier family 25 (mitochondrial carrier
1434803_a_at	3.46863	down	Sycn	syncollin
1434827_at	2.17738	down	Thoc6	THO complex 6 homolog (Drosophila)
1434836_at	4.74838	down	Nfatc2ip	nuclear factor of activated T-cells
1434839_s_at	3.25853	down	Tbl1xr1	transducin (beta)-like 1X-linked receptor 1
1434840_at	2.48083	down	Agfg1	ArfGAP with FG repeats 1
1434850_at	3.15531	down	Iqgap3	IQ motif containing GTPase activating protein 3
1434853_x_at	2.20338	down	Mkrn1	makorin
1434953_at	2.26177	down	Ccdc93	coiled-coil domain containing 93
1434976_x_at	3.85815	down	Eif4ebp1	eukaryotic translation initiation factor 4E binding protein 1
1434985_a_at	2.08751	down	Eif4a1	eukaryotic translation initiation factor 4A1
1434998_at	2.84559	down	Iqgap1	IQ motif containing GTPase activating protein 1
1435006_s_at	2.36913	down	Abcb7	ATP-binding cassette
1435018_at	2.34734	down	5930434B04Rik /// LOC100047034	RIKEN cDNA 5930434B04 gene /// hypothetical protein LOC100047034
1435055_a_at	2.10329	down	EG545878 /// Tom1	predicted gene
1435140_at	2.68539	down	Ide	insulin degrading enzyme
1435194_at	2.50029	down	Hspa4	heat shock protein 4
1436884_x_at	4.67875	down	Ewsr1	Ewing sarcoma breakpoint region 1
1435235_at	3.51898	down	Txnl1	thioredoxin-like 1
1455286_at	2.46287	down	Btbd1	BTB (POZ) domain containing 1
1435414_s_at	2.9109	down	Dctn1	dynactin 1
1435415_x_at	2.19815	down	Marcksl1	MARCKS-like 1
1435450_at	2.53461	down	Cpne3	copine III
1435493_at	8.85119	down	Dsp	desmoplakin
1435494_s_at	8.86276	down	Dsp	desmoplakin
1455348_x_at	2.63779	down	433941 /// 622707 /// EG666642 /// ENSMUSG00000074516 /// LOC100044494 /// OTTMUSG00000014710 /// Rpl29	predicted gene
1435586_at	3.45121	down	Pcid2	PCI domain containing 2
1455364_a_at	4.08101	down	EG640050 /// Rps7	predicted gene
1435627_x_at	3.28608	down	668321 /// Marcksl1	predicted gene
1435628_x_at	2.07266	down	629242 /// BC005512 /// EG641366	predicted gene
1435659_a_at	2.16209	down	Tpi1	triosephosphate isomerase 1
1435733_x_at	5.33749	down	Rnaseh2c	ribonuclease H2
1435789_x_at	2.05601	down
1435800_a_at	5.11418	down	Csda	cold shock domain protein A
1455470_x_at	16.7667	down	Lasp1	LIM and SH3 protein 1
1435864_a_at	2.02467	down	1810063B05Rik	RIKEN cDNA 1810063B05 gene
1435881_at	2.10979	down	Pcbp2	poly(rC) binding protein 2
1435945_a_at	3.20223	down	Kcnn4	potassium intermediate/small conductance calcium-activated channel
1435966_x_at	2.26439	down	Mrpl13	mitochondrial ribosomal protein L13
1435989_x_at	14.3772	down	Krt8	keratin 8
1455546_s_at	2.12794	down	Sf3a2	splicing factor 3a
1455563_at	2.86596	down	Ddx49	DEAD (Asp-Glu-Ala-Asp) box polypeptide 49
1455570_x_at	4.55917	down	Cnn3 /// LOC100047856	calponin 3
1436152_a_at	2.51111	down	Hbxip	hepatitis B virus x interacting protein
1436269_s_at	3.91524	down	Htra2	HtrA serine peptidase 2
1436320_at	2.61426	down
1436349_at	2.93271	down	2700094K13Rik	RIKEN cDNA 2700094K13 gene
1455678_at	3.95094	down	Sema4b	sema domain
1436479_a_at	3.23043	down	Dpp7	dipeptidylpeptidase 7
1455731_at	4.86679	down	Slc29a3	solute carrier family 29 (nucleoside transporters)
1437670_x_at	3.39093	down	Cd151	CD151 antigen
1455777_x_at	8.80307	down	Hsd17b4	hydroxysteroid (17-beta) dehydrogenase 4
1456438_x_at	4.50483	down	Rpn1	ribophorin I
1436704_x_at	2.1668	down	Mthfd1	methylenetetrahydrofolate dehydrogenase (NADP+ dependent)
1436707_x_at	2.4194	down	Ncaph	non-SMC condensin I complex
1436722_a_at	4.89036	down	Actb	actin
1455805_x_at	5.30088	down	Ccdc22	coiled-coil domain containing 22
1455806_x_at	4.18996	down	Ndufa12	NADH dehydrogenase (ubiquinone) 1 alpha subcomplex
1436756_x_at	3.37498	down	Hadh	hydroxyacyl-Coenzyme A dehydrogenase
1436759_x_at	4.69008	down	Cnn3 /// LOC100047856	calponin 3
1436762_x_at	4.10906	down	Elp3	Elongation protein 3 homolog (S. cerevisiae)
1455820_x_at	2.47799	down	Scarb1	scavenger receptor class B
1436801_x_at	2.63318	down	Cdc42ep4	CDC42 effector protein (Rho GTPase binding) 4
1436849_x_at	2.50445	down	Gaa	glucosidase
1436856_x_at	2.24529	down	Tars2	threonyl-tRNA synthetase 2
1436874_x_at	6.0773	down	Slc25a5	solute carrier family 25 (mitochondrial carrier
1436886_x_at	2.17926	down	Xab2	XPA binding protein 2
1436900_x_at	2.98486	down	Leprot	leptin receptor overlapping transcript
1436902_x_at	9.8498	down	ENSMUSG00000050347 /// Tmsb10	predicted gene
1436917_s_at	4.81775	down	Gpsm1	G-protein signalling modulator 1 (AGS3-like
1436934_s_at	3.83479	down	Aco2	aconitase 2
1436936_s_at	3.9123	down	Xist	inactive X specific transcripts
1436946_s_at	2.18173	down	100041120 /// Gng5 /// LOC100043507 /// LOC100044719 /// LOC100048410 /// OTTMUSG00000011511	predicted gene
1436971_x_at	4.67093	down	Ywhaz	tyrosine 3-monooxygenase/tryptophan 5-monooxygenase activation protein
1436979_x_at	2.6416	down	Rbm14	RNA binding motif protein 14
1436990_s_at	3.77526	down	Chchd10	coiled-coil-helix-coiled-coil-helix domain containing 10
1436992_x_at	2.07321	down	Vdac1	voltage-dependent anion channel 1
1437005_a_at	2.92266	down	Rpl18	ribosomal protein L18
1437013_x_at	4.23353	down	Atp6v0b	ATPase
1437014_x_at	2.13353	down	EG637273 /// Prdx1	predicted gene
1437026_at	2.22832	down	BC057893	cDNA sequence BC057893
1437032_x_at	2.50934	down	Rbm14	RNA binding motif protein 14
1437044_a_at	2.64216	down	Gba	glucosidase
1437051_at	2.26293	down	Dffb	DNA fragmentation factor
1455900_x_at	2.29227	down	Tgm2	transglutaminase 2
1456055_x_at	3.05093	down	Pold1	polymerase (DNA directed)
1438945_x_at	3.81763	down	Gja1	gap junction protein
1437131_x_at	2.756	down	Mrpl11	mitochondrial ribosomal protein L11
1455927_x_at	2.78795	down	Nsmce1	Non-SMC element 1 homolog (S. cerevisiae)
1455929_x_at	4.5681	down	Ppp2r1a	protein phosphatase 2 (formerly 2A)
1437171_x_at	2.22972	down	Gsn	gelsolin
1437185_s_at	5.66043	down	ENSMUSG00000050347 /// LOC100048142 /// Tmsb10	predicted gene
1437192_x_at	2.40822	down	Vdac1	voltage-dependent anion channel 1
1437211_x_at	8.01073	down	Elovl5	ELOVL family member 5
1437220_x_at	2.44837	down	Psmd13	26S proteasome subunit p40.5
1455972_x_at	10.8529	down	Hadh	hydroxyacyl-Coenzyme A dehydrogenase
1437223_s_at	3.44419	down	Xbp1	X-box binding protein 1
1437226_x_at	3.64414	down	Marcksl1	MARCKS-like 1
1437236_a_at	6.1443	down	Zfp110	zinc finger protein 110
1437237_x_at	3.66758	down	Zfp110	zinc finger protein 110
1437262_x_at	3.02032	down	Bcas2	breast carcinoma amplified sequence 2
1437277_x_at	4.67354	down	Tgm2	transglutaminase 2
1437281_x_at	2.15422	down	Xab2	XPA binding protein 2
1437288_at	2.71484	down	Impad1	inositol monophosphatase domain containing 1
1437289_at	2.836	down	Impad1	inositol monophosphatase domain containing 1
1455997_a_at	2.71809	down	100040778 /// Uqcrb	predicted gene
1456009_x_at	2.73115	down	Top3b	topoisomerase (DNA) III beta
1437338_x_at	3.0334	down	Elp3	Elongation protein 3 homolog (S. cerevisiae)
1456011_x_at	2.83536	down	Acaa1a /// Acaa1b	acetyl-Coenzyme A acyltransferase 1A /// acetyl-Coenzyme A acyltransferase 1B
1456012_x_at	6.70641	down	Gm1604A /// Gm1604b /// Rnaset2a /// Rnaset2b	gene model 1604A
1456015_x_at	3.28226	down	Ndufv1	NADH dehydrogenase (ubiquinone) flavoprotein 1
1456028_x_at	2.75679	down	Marcks	myristoylated alanine rich protein kinase C substrate
1437378_x_at	2.90079	down	Scarb1	scavenger receptor class B
1456036_x_at	27.387	down	Gsto1	glutathione S-transferase omega 1
1437390_x_at	2.81871	down	Stx1a	syntaxin 1A (brain)
1437437_x_at	2.60955	down	Dnpep	aspartyl aminopeptidase
1437438_x_at	3.57808	down	Pnliprp2	pancreatic lipase-related protein 2
1456176_x_at	3.98243	down	Slc25a39	solute carrier family 25
1437455_a_at	2.10421	down	Btg1 /// LOC100047353	B-cell translocation gene 1
1456085_x_at	4.14913	down	Cd151	CD151 antigen
1437534_at	3.16329	down
1437593_x_at	3.98248	down	Api5	apoptosis inhibitor 5
1437621_x_at	2.17598	down	EG665516 /// EG666036 /// EG668771 /// Phgdh	predicted gene
1437624_x_at	3.48103	down	Nudt16l1	nudix (nucleoside diphosphate linked moiety X)-type motif 16-like 1
1437649_x_at	3.61985	down	Ppib	peptidylprolyl isomerase B
1437687_x_at	6.56155	down	Fkbp9	FK506 binding protein 9
1437706_x_at	2.09268	down	EG545121 /// Rps14	predicted gene
1437708_x_at	3.34472	down	Vamp3	vesicle-associated membrane protein 3
1437709_x_at	2.69746	down	Ttc13	tetratricopeptide repeat domain 13
1437712_x_at	2.30126	down	Exosc4	exosome component 4
1437723_s_at	2.25798	down	Derl1	Der1-like domain family
1437783_x_at	3.41302	down	Cnpy2	canopy 2 homolog (zebrafish)
1437835_a_at	2.53792	down	0610011L14Rik	RIKEN cDNA 0610011L14 gene
1437867_at	2.33393	down
1437947_x_at	2.55352	down	Vdac1	voltage-dependent anion channel 1
1437982_x_at	2.65121	down	Cox15	COX15 homolog
1437992_x_at	2.6678	down	Gja1	gap junction protein
1456245_x_at	3.70194	down	Vamp3	vesicle-associated membrane protein 3
1437997_x_at	2.84886	down	Mrpl48	mitochondrial ribosomal protein L48
1438009_at	2.53065	down	Hist1h2ab /// Hist1h2ac /// Hist1h2ad /// Hist1h2ae /// Hist1h2ag /// Hist1h2ai /// Hist1h2an /// Hist1h2ao /// RP23-480B19.10	histone cluster 1
1456309_x_at	4.2738	down	Lasp1	LIM and SH3 protein 1
1456310_a_at	2.1681	down	2610002J02Rik	RIKEN cDNA 2610002J02 gene
1438161_s_at	2.94396	down	Rfc4	replication factor C (activator 1) 4
1456312_x_at	2.53469	down	Gsn	gelsolin
1438165_x_at	2.25102	down	Vat1	vesicle amine transport protein 1 homolog (T californica)
1438991_x_at	6.36224	down	Ppp2r1a	protein phosphatase 2 (formerly 2A)
1438169_a_at	6.03235	down	Frmd4b	FERM domain containing 4B
1438173_x_at	2.38014	down	Pmf1	polyamine-modulated factor 1
1438223_at	2.92801	down
1438360_x_at	5.50419	down	EG383528 /// EG433326 /// Slc25a5	predicted gene
1438370_x_at	2.35491	down	Dos	downstream of Stk11
1456377_x_at	4.37686	down	Limd2	LIM domain containing 2
1438383_x_at	5.979	down	Ppp2r1a	protein phosphatase 2 (formerly 2A)
1438391_x_at	2.21574	down	Hsd17b10	hydroxysteroid (17-beta) dehydrogenase 10
1456390_at	2.55111	down	Ppp2ca	protein phosphatase 2 (formerly 2A)
1438545_at	3.41086	down	EG433326 /// EG433923 /// EG623402 /// EG667030 /// Slc25a5	predicted gene
1438546_x_at	4.87947	down	EG433326 /// EG433923 /// EG623402 /// EG667030 /// Slc25a5	predicted gene
1438557_x_at	3.38868	down	Dnpep	aspartyl aminopeptidase
1438610_a_at	8.14997	down	Cryz	crystallin
1438631_x_at	2.78911	down	Ttc13	tetratricopeptide repeat domain 13
1438633_x_at	11.4714	down	Lasp1	LIM and SH3 protein 1
1438634_x_at	19.8414	down	Lasp1	LIM and SH3 protein 1
1456471_x_at	2.00869	down	EG385344 /// EG627427 /// EG665516 /// EG666036 /// EG666422 /// EG666875 /// EG668506 /// EG668576 /// EG668771 /// LOC630761 /// LOC630896 /// OTTMUSG00000011498 /// Phgdh	predicted gene
1438644_x_at	2.50243	down	Commd9	COMM domain containing 9
1438650_x_at	2.49135	down	Gja1	gap junction protein
1438776_x_at	2.01043	down	100040123 /// EG383032 /// EG665772 /// LOC674335 /// Rps17	predicted gene
1438835_a_at	2.98834	down	Eftud2	elongation factor Tu GTP binding domain containing 2
1456566_x_at	2.53231	down	Rbm14	RNA binding motif protein 14
1456567_x_at	3.51332	down	Grn	granulin
1438922_x_at	5.47845	down	EG383528 /// EG433326 /// Slc25a5	predicted gene
1438943_x_at	4.35566	down	Rpn1	ribophorin I
1456580_s_at	2.98709	down	Atp5d	ATP synthase
1438955_x_at	2.59116	down	Ppif	peptidylprolyl isomerase F (cyclophilin F)
1438968_x_at	2.27864	down	Spint2	serine protease inhibitor
1439030_at	2.06041	down	Gmppb	GDP-mannose pyrophosphorylase B
1439150_x_at	6.0479	down	Grtp1	GH regulated TBC protein 1
1439184_s_at	2.27913	down	Txndc17	thioredoxin domain containing 17
1439200_x_at	2.1739	down
1439256_x_at	3.19613	down	Gpr137b-ps	G protein-coupled receptor 137B
1439257_x_at	4.01922	down	Rpn1	ribophorin I
1456700_x_at	2.3476	down	Marcks	myristoylated alanine rich protein kinase C substrate
1439264_x_at	8.85863	down	Lasp1	LIM and SH3 protein 1
1439269_x_at	2.26752	down	Mcm7	minichromosome maintenance deficient 7 (S. cerevisiae)
1439375_x_at	4.0203	down	Aldoa /// Aldoart1	aldolase A
1439389_s_at	2.3606	down	Myadm	myeloid-associated differentiation marker
1456728_x_at	2.5276	down	Aco1	aconitase 1
1439399_a_at	2.86221	down	Snhg1	small nucleolar RNA host gene (non-protein coding) 1
1439407_x_at	2.73492	down	Tagln2	transgelin 2
1439410_x_at	5.25564	down	Slc25a39	solute carrier family 25
1439411_a_at	2.64533	down	Xpo7	exportin 7
1439422_a_at	2.19522	down	Fam132a	family with sequence similarity 132
1456745_x_at	2.42362	down	Ergic3	ERGIC and golgi 3
1439441_x_at	6.36982	down	Lats2	large tumor suppressor 2
1439444_x_at	2.02636	down	Tmed10	transmembrane emp24-like trafficking protein 10 (yeast)
1439452_x_at	3.03857	down	Dnpep	aspartyl aminopeptidase
1439453_x_at	5.32076	down	Rnaseh2c	ribonuclease H2
1439455_x_at	2.67769	down	Capza1	capping protein (actin filament) muscle Z-line
1439460_a_at	2.22603	down	Arfgap2	ADP-ribosylation factor GTPase activating protein 2
1439462_x_at	2.11913	down	Tmed10	transmembrane emp24-like trafficking protein 10 (yeast)
1439476_at	2.23189	down	Dsg2	desmoglein 2
1439516_at	2.07847	down	2610201A13Rik	RIKEN cDNA 2610201A13 gene
1439973_at	2.3437	down	Crxos1	Crx opposite strand transcript 1
1440195_at	2.32981	down	Serbp1	Serpine1 mRNA binding protein 1
1440253_at	2.41111	down	Psmd11	Proteasome (prosome
1441866_s_at	2.72618	down	LOC674712 /// Ptdss1	similar to phosphatidylserine synthase 1 /// phosphatidylserine synthase 1
1442006_at	2.38594	down
1447957_at	2.10253	down	D7Ertd128e	DNA segment
1447997_s_at	4.70743	down	Timm8a2	translocase of inner mitochondrial membrane 8 homolog a2 (yeast)
1448020_at	2.14293	down	Rap1a	RAS-related protein-1a (Rap1a)
1448022_at	4.15845	down
1448029_at	4.45805	down	Tbx3	T-box 3
1419821_s_at	4.21586	down	Idh1	isocitrate dehydrogenase 1 (NADP+)
1449633_s_at	2.56134	down	Nt5c3l	5'-nucleotidase
1449635_at	2.70144	down	Prpf19	PRP19/PSO4 pre-mRNA processing factor 19 homolog (S. cerevisiae)
1419839_x_at	2.84042	down	Prpf19	PRP19/PSO4 pre-mRNA processing factor 19 homolog (S. cerevisiae)
1449670_x_at	3.99299	down	Gpr137b /// LOC100044979	G protein-coupled receptor 137B /// similar to Gpr137b protein
1449686_s_at	6.94418	down	Scp2	sterol carrier protein 2
1420000_s_at	3.87027	down	Igbp1	immunoglobulin (CD79A) binding protein 1
1420171_s_at	2.03768	down	Myh9	myosin
1420172_at	2.1257	down
1449799_s_at	6.0907	down	Pkp2	plakophilin 2
AFFX-TransRecMur/X57349_3_at	3.78506	up	Tfrc	transferrin receptor
1415741_at	2.22793	up	Tmem165	transmembrane protein 165
1415746_at	2.45327	up	Cic	capicua homolog (Drosophila)
1415720_s_at	3.44704	up	Mad2l1bp	MAD2L1 binding protein
1460655_a_at	2.10883	up	Ubp1	upstream binding protein 1
1415749_a_at	5.5371	up	Rragc	Ras-related GTP binding C
1415704_a_at	2.54478	up	Cdv3	carnitine deficiency-associated gene expressed in ventricle 3
1415699_a_at	2.12082	up	Gps1	G protein pathway suppressor 1
1460678_at	3.33045	up	Klhdc2	kelch domain containing 2
1460688_s_at	2.47688	up	Unc119b	unc-119 homolog B (C. elegans)
1460691_at	2.08897	up	Zfp598	zinc finger protein 598
1415711_at	5.73837	up	Arfgef1	ADP-ribosylation factor guanine nucleotide-exchange factor 1(brefeldin A-inhibited)
1460736_at	2.06748	up	A230054D04Rik	RIKEN cDNA A230054D04 gene
1415712_at	2.44618	up	Ctbp2 /// Zranb1	C-terminal binding protein 2 /// zinc finger
1415718_at	3.05876	up	LOC100044471 /// Sap30l	similar to SAP30-like /// SAP30-like
1415731_at	2.59536	up	Angel2	angel homolog 2 (Drosophila)
1460711_at	2.93388	up	Dnajc21	DnaJ (Hsp40) homolog
1415794_a_at	11.9722	up	LOC100046080 /// Spin1	similar to Spindlin 1 /// spindlin 1
1415795_at	2.91209	up	LOC100046080 /// Spin1	similar to Spindlin 1 /// spindlin 1
1460164_at	19.8037	up	LOC100046080 /// Spin1	similar to Spindlin 1 /// spindlin 1
1415802_at	2.7249	up	Slc16a1	solute carrier family 16 (monocarboxylic acid transporters)
1451310_a_at	3.57132	up	Ctsl	cathepsin L
1415846_a_at	4.10114	up	Ldhc	lactate dehydrogenase C
1415847_at	2.80035	up	Ldhc	lactate dehydrogenase C
1415864_at	2.16223	up	Bpgm	2
1415865_s_at	5.3659	up	Bpgm	2
1448120_at	2.3591	up	Gdf9	growth differentiation factor 9
1448133_at	2.22166	up	Nmd3	NMD3 homolog (S. cerevisiae)
1415889_a_at	2.70213	up	Hsp90b1	heat shock protein 90
1452514_a_at	4.7647	up	Kit	kit oncogene
1415920_at	2.00395	up	Cstf2t	cleavage stimulation factor
1460168_at	4.34906	up	Slbp	stem-loop binding protein
1415936_at	2.02623	up	Bcar3	breast cancer anti-estrogen resistance 3
1415941_s_at	2.16303	up	Zfand2a	zinc finger
1415946_at	2.05434	up	Pigq	phosphatidylinositol glycan anchor biosynthesis
1415975_at	3.85154	up	Carhsp1	calcium regulated heat stable protein 1
1415981_at	9.19074	up	Herpud2	HERPUD family member 2
1415993_at	3.00881	up	Sqle	squalene epoxidase
1448170_at	31.3707	up	Siah2	seven in absentia 2
1448171_at	6.11078	up	Siah2	seven in absentia 2
1448174_at	3.4862	up	Cul1	cullin 1
1416018_at	3.132	up	Dr1	down-regulator of transcription 1
1416019_at	10.3463	up	Dr1	down-regulator of transcription 1
1416048_at	6.12038	up	Phc2	polyhomeotic-like 2 (Drosophila)
1448196_at	6.29387	up	Mat2b	methionine adenosyltransferase II
1416064_a_at	2.85652	up	Hspa5	heat shock protein 5
1427464_s_at	3.70784	up	Hspa5	heat shock protein 5
1425419_a_at	2.7329	up	Raf1	v-raf-leukemia viral oncogene 1
1416078_s_at	2.9445	up	Raf1	v-raf-leukemia viral oncogene 1
1416083_at	4.04573	up	LOC100047896 /// Zfand5	similar to zinc finger protein ZNF216 /// zinc finger
1416084_at	2.59367	up	LOC100047896 /// Zfand5	similar to zinc finger protein ZNF216 /// zinc finger
1416085_s_at	3.33009	up	LOC100047896 /// Zfand5	similar to zinc finger protein ZNF216 /// zinc finger
1416091_at	2.77834	up	Mtap4	microtubule-associated protein 4
1416118_at	3.46828	up	LOC630539 /// Trim59	similar to mouse RING finger 1 /// tripartite motif-containing 59
1416125_at	6.68521	up	Fkbp5	FK506 binding protein 5
1416129_at	8.43541	up	Errfi1	ERBB receptor feedback inhibitor 1
1416138_at	2.11315	up	Anxa7	annexin A7
1416146_at	2.03182	up	Hspa4	heat shock protein 4
1416148_at	6.59187	up	Laptm4b	lysosomal-associated protein transmembrane 4B
1416155_at	2.72913	up	Hmgb3	high mobility group box 3
1416162_at	3.30701	up	Rad21	RAD21 homolog (S. pombe)
1416171_at	2.54893	up	2310037I24Rik	RIKEN cDNA 2310037I24 gene
1448236_at	3.23248	up	Rdx	radixin
1416183_a_at	5.03036	up	Ldhb	lactate dehydrogenase B
1448237_x_at	8.78749	up	Ldhb	lactate dehydrogenase B
1416201_at	3.72438	up	Crk	v-crk sarcoma virus CT10 oncogene homolog (avian)
1448248_at	21.8867	up	Crk	v-crk sarcoma virus CT10 oncogene homolog (avian)
1460176_at	2.06178	up	Crk	v-crk sarcoma virus CT10 oncogene homolog (avian)
1416209_at	2.34427	up	Glud1	glutamate dehydrogenase 1
1416224_at	2.11156	up	Zbtb17	zinc finger and BTB domain containing 17
1448269_a_at	4.25768	up	Klhl13	kelch-like 13 (Drosophila)
1416251_at	2.34699	up	Mcm6	minichromosome maintenance deficient 6 (MIS5 homolog
1416256_a_at	2.72566	up	Tubb5	tubulin
1416267_at	7.2243	up	Scoc	short coiled-coil protein
1416280_at	2.06865	up	Uba2	ubiquitin-like modifier activating enzyme 2
1416313_at	10.596	up	Mllt11	myeloid/lymphoid or mixed-lineage leukemia (trithorax homolog
1448297_a_at	4.42963	up	Tnk2	tyrosine kinase
1460180_at	2.16939	up	Hexb	hexosaminidase B
1416324_s_at	2.07566	up	Kctd20	potassium channel tetramerisation domain containing 20
1416344_at	2.31075	up	Lamp2	lysosomal-associated membrane protein 2
1416359_at	2.27416	up	Snx18	sorting nexin 18
1416377_at	2.3258	up	Pdcd7	programmed cell death 7
1425099_a_at	2.03152	up	Arntl	aryl hydrocarbon receptor nuclear translocator-like
1416428_at	4.43704	up	Thap11	THAP domain containing 11
1416434_at	8.24094	up	Bcl2l10	Bcl2-like 10
1448343_a_at	2.28721	up	Nbr1	neighbor of Brca1 gene 1
1431075_a_at	2.71903	up	Eif4enif1	eukaryotic translation initiation factor 4E nuclear import factor 1
1416469_at	2.54026	up	Luzp1	leucine zipper protein 1
1448356_at	8.64478	up	Ube2d2	ubiquitin-conjugating enzyme E2D 2
1416476_a_at	3.09656	up	Ube2d2	ubiquitin-conjugating enzyme E2D 2
1416477_at	5.36679	up	ENSMUSG00000037096 /// Ube2d2	predicted gene
1448360_s_at	4.95415	up	Angel2	angel homolog 2 (Drosophila)
1448361_at	2.19351	up	Ttc3	tetratricopeptide repeat domain 3
1448363_at	2.9882	up	Yap1	yes-associated protein 1
1416487_a_at	2.01888	up	Yap1	yes-associated protein 1
1416488_at	3.3916	up	Ccng2	cyclin G2
1416490_at	2.87321	up	LOC100047810 /// Tmed6	similar to transmembrane emp24 protein transport domain containing 6 /// transmembrane emp24 protein transport domain containing 6
1416501_at	2.34271	up	Pdpk1	3-phosphoinositide dependent protein kinase-1
1416542_at	5.30873	up	Phf1	PHD finger protein 1
1416545_at	2.96533	up	Zdhhc7	zinc finger
1416555_at	2.74374	up	Ei24	etoposide induced 2.4 mRNA
1416575_at	2.95002	up	Cdc45l	cell division cycle 45 homolog (S. cerevisiae)-like
1416590_a_at	2.74374	up	Rab34	RAB34
1416598_at	3.48191	up	Glis2	GLIS family zinc finger 2
1416607_at	3.10864	up	4931406C07Rik	RIKEN cDNA 4931406C07 gene
1448410_at	2.95382	up	Ube4b	ubiquitination factor E4B
1432499_a_at	2.2383	up	Ube4b	ubiquitination factor E4B
1448425_at	3.43087	up	Eif3a	eukaryotic translation initiation factor 3
1448429_at	3.1312	up	Gyg	glycogenin
1416680_at	3.04693	up	Ube3a	ubiquitin protein ligase E3A
1448434_at	4.06928	up	Rnf103	ring finger protein 103
1416703_at	2.0611	up	Mapk14	mitogen-activated protein kinase 14
1416704_at	2.25835	up	Mapk14	mitogen-activated protein kinase 14
1416742_at	2.5496	up	Cfdp1	craniofacial development protein 1
1416751_a_at	3.1542	up	Ddx20	DEAD (Asp-Glu-Ala-Asp) box polypeptide 20
1416767_a_at	24.3353	up	1110003E01Rik	RIKEN cDNA 1110003E01 gene
1416768_at	5.11421	up	1110003E01Rik	RIKEN cDNA 1110003E01 gene
1420056_s_at	2.46795	up	Jmjd6	jumonji domain containing 6
1448484_at	2.6533	up	Amd-ps3 /// Amd1 /// Amd2	S-adenosylmethionine decarboxylase
1416844_at	2.99646	up	Prmt2	protein arginine N-methyltransferase 2
1416847_s_at	5.31173	up	Oas1d /// Oas1e	2'-5' oligoadenylate synthetase 1D /// 2'-5' oligoadenylate synthetase 1E
1416854_at	2.39783	up	Slc34a2	solute carrier family 34 (sodium phosphate)
1416856_at	2.07754	up	3230401D17Rik	RIKEN cDNA 3230401D17 gene
1416860_s_at	2.23711	up	Ing1	inhibitor of growth family
1448496_a_at	2.10073	up	Ing1	inhibitor of growth family
1416864_at	2.25887	up	Surf6	surfeit gene 6
1416874_a_at	2.985	up	Paf1	Paf1
1416891_at	2.02005	up	Numb	numb gene homolog (Drosophila)
1416897_at	2.35735	up	Parp9	poly (ADP-ribose) polymerase family
1416928_at	2.08869	up	Rbm12	RNA binding motif protein 12
1416939_at	3.1841	up	Ppa1	pyrophosphatase (inorganic) 1
1416944_a_at	2.02043	up	Tlk2	tousled-like kinase 2 (Arabidopsis)
1416958_at	4.12634	up	Nr1d2	nuclear receptor subfamily 1
1416981_at	2.24896	up	Foxo1	forkhead box O1
1416982_at	2.96394	up	Foxo1	forkhead box O1
1419809_s_at	2.98291	up	Cog4	component of oligomeric golgi complex 4
1417001_a_at	2.65093	up	D4Wsu53e	DNA segment
1448540_a_at	2.62685	up	0610012G03Rik	RIKEN cDNA 0610012G03 gene
1417010_at	2.75907	up	Zfp238	zinc finger protein 238
1437398_a_at	2.83576	up	Aldh9a1	aldehyde dehydrogenase 9
1454034_a_at	2.14702	up	Usp21	ubiquitin specific peptidase 21
1417045_at	2.83386	up	Bid	BH3 interacting domain death agonist
1417065_at	3.21713	up	Egr1	early growth response 1
1448582_at	2.28003	up	Ctnnbl1	catenin
1417112_at	2.43011	up	Arl2bp	ADP-ribosylation factor-like 2 binding protein
1448595_a_at	2.05415	up	Bex1	brain expressed gene 1
1431429_a_at	3.21184	up	Arl4a	ADP-ribosylation factor-like 4A
1417129_a_at	3.99521	up	Meis2	Meis homeobox 2
1417132_at	2.0087	up	Cdc25a	cell division cycle 25 homolog A (S. pombe)
1417134_at	2.38917	up	Srpk2	serine/arginine-rich protein specific kinase 2
1417139_at	2.15489	up	Dsn1	DSN1
1417140_a_at	2.28845	up	Ptpn2	protein tyrosine phosphatase
1417145_at	8.19612	up	Nfxl1	nuclear transcription factor
1417154_at	3.36736	up	Slc25a14	solute carrier family 25 (mitochondrial carrier
1417166_at	17.5379	up	Psip1	PC4 and SFRS1 interacting protein 1
1417170_at	2.47206	up	Lztfl1	leucine zipper transcription factor-like 1
1417183_at	5.23153	up	Dnaja2	DnaJ (Hsp40) homolog
1417188_s_at	2.72856	up	Ube2k	ubiquitin-conjugating enzyme E2K (UBC1 homolog
1417190_at	2.41984	up	Nampt	nicotinamide phosphoribosyltransferase
1417191_at	2.04083	up	Dnajb9	DnaJ (Hsp40) homolog
1448611_at	3.54817	up	Wwc2	WW
1417195_at	4.32924	up	Wwc2	WW
1417196_s_at	3.99793	up	Wwc2	WW
1417202_s_at	2.00229	up	Uba3	ubiquitin-like modifier activating enzyme 3
1455434_a_at	3.91645	up	Ktn1	kinectin 1
1448620_at	3.31171	up	Fcgr3	Fc receptor
1417224_a_at	2.42879	up	Cd2bp2	CD2 antigen (cytoplasmic tail) binding protein 2
1448624_at	2.52246	up	Cd2bp2	CD2 antigen (cytoplasmic tail) binding protein 2
1417230_at	7.13372	up	Ralgps2	Ral GEF with PH domain and SH3 binding motif 2
1417254_at	2.59468	up	Spata5	spermatogenesis associated 5
1448641_at	4.72118	up	Mbtd1	mbt domain containing 1
1417261_at	3.27712	up	Mbtd1	mbt domain containing 1
1417269_at	2.16306	up	Cdk9	cyclin-dependent kinase 9 (CDC2-related kinase)
1460203_at	6.99797	up	Itpr1	inositol 1
1417279_at	2.06309	up	Itpr1	inositol 1
1417284_at	3.19836	up	Mapkap1	mitogen-activated protein kinase associated protein 1
1454149_a_at	3.63882	up	AI428898 /// Ccnl2	expressed sequence AI428898 /// cyclin L2
1432195_s_at	2.39818	up	AI428898 /// Ccnl2	expressed sequence AI428898 /// cyclin L2
1417298_at	2.56618	up	Ebpl	emopamil binding protein-like
1417299_at	2.59878	up	Nek2	NIMA (never in mitosis gene a)-related expressed kinase 2
1448666_s_at	3.85397	up	Tob2	transducer of ERBB2
1417315_at	2.11143	up	Gripap1	GRIP1 associated protein 1
1417316_at	3.2956	up	Them2	thioesterase superfamily member 2
1448673_at	8.41647	up	Pvrl3	poliovirus receptor-related 3
1417324_at	3.65242	up	Mast2	microtubule associated serine/threonine kinase 2
1448678_at	3.82396	up	Fam118a	family with sequence similarity 118
1417341_a_at	2.22129	up	Ppp1r2	protein phosphatase 1
1451765_a_at	2.01608	up	Entpd5	ectonucleoside triphosphate diphosphohydrolase 5
1417382_at	2.1363	up	Entpd5	ectonucleoside triphosphate diphosphohydrolase 5
1438278_a_at	2.88427	up	Cwc22	CWC22 spliceosome-associated protein homolog (S. cerevisiae)
1417400_at	2.4225	up	Rai14	retinoic acid induced 14
1417406_at	2.11042	up	Sertad1	SERTA domain containing 1
1448693_at	2.82374	up	Gltpd1	glycolipid transfer protein domain containing 1
1417426_at	4.1848	up	Srgn	serglycin
1417430_at	7.03762	up	Cdr2	cerebellar degeneration-related 2
1448704_s_at	2.44515	up	H47	histocompatibility 47
1448706_at	4.8287	up	Ttrap	Traf and Tnf receptor associated protein
1454044_a_at	2.95175	up	Pex3	peroxisomal biogenesis factor 3
1417442_a_at	2.8733	up	Pex3	peroxisomal biogenesis factor 3
1417444_at	9.27047	up	E2f5	E2F transcription factor 5
1460207_s_at	7.96116	up	E2f5	E2F transcription factor 5
1417445_at	2.31324	up	Ndc80	NDC80 homolog
1417453_at	3.93715	up	Cul4b	cullin 4B
1448721_at	8.86937	up	D1Ertd622e	DNA segment
1417471_s_at	11.4864	up	D1Ertd622e	DNA segment
1448727_at	2.35043	up	Tle6	transducin-like enhancer of split 6
1448733_at	17.4122	up	Bmi1	Bmi1 polycomb ring finger oncogene
1417493_at	10.9288	up	Bmi1	Bmi1 polycomb ring finger oncogene
1417506_at	2.04535	up	Gmnn	geminin
1417508_at	2.83614	up	Rnf19a	ring finger protein 19A
1417511_at	2.20324	up	Lyar	Ly1 antibody reactive clone
1417512_at	4.08944	up	Evi5	ecotropic viral integration site 5
1417513_at	4.09117	up	Evi5	ecotropic viral integration site 5
1448746_at	2.40576	up	Nbn	nibrin
1448753_at	2.00852	up	Srp9	signal recognition particle 9
1426124_a_at	2.18716	up	Clk1	CDC-like kinase 1
1417540_at	2.88432	up	Elf1	E74-like factor 1
1448760_at	2.578	up	Zfp68	zinc finger protein 68
1417549_at	4.55518	up	Zfp68	zinc finger protein 68
1448762_at	3.53808	up	Rad17	RAD17 homolog (S. pombe)
1448765_at	4.11985	up	Fyn	Fyn proto-oncogene
1417564_at	2.09564	up	Med7	mediator complex subunit 7
1417575_at	2.60627	up	Otub2	OTU domain
1417583_a_at	3.91934	up	Utp3	UTP3
1417594_at	2.50958	up	Gkap1	G kinase anchoring protein 1
1448778_at	2.12594	up	Sfrs4	splicing factor
1448780_at	2.42049	up	Slc12a2	solute carrier family 12
1417623_at	5.95614	up	Slc12a2	solute carrier family 12
1448787_at	2.85516	up	LOC100233175 /// Moap1	hypothetical protein LOC100233175 /// modulator of apoptosis 1
1417644_at	3.43273	up	Sspn	sarcospan
1448802_at	2.38082	up	Nufip1	nuclear fragile X mental retardation protein interacting protein 1
1417698_at	2.58518	up	Gtf2f1	general transcription factor IIF
1417710_at	4.29087	up	Mettl9	methyltransferase like 9
1417719_at	2.40041	up	Sap30	sin3 associated polypeptide
1417733_at	2.08699	up	Rnf146	ring finger protein 146
1448828_at	4.08972	up	Smc6	structural maintenance of chromosomes 6
1417740_at	5.89986	up	Cdc37l1	cell division cycle 37 homolog (S. cerevisiae)-like 1
1453107_s_at	3.92673	up	4933413G19Rik /// Foxm1 /// Pebp1	RIKEN cDNA 4933413G19 gene /// forkhead box M1 /// phosphatidylethanolamine binding protein 1
1448834_at	2.13101	up	Foxm1	forkhead box M1
1417751_at	2.32309	up	Stk10	serine/threonine kinase 10
1448837_at	2.74157	up	Vil1	villin 1
1417757_at	3.90246	up	Unc13b	unc-13 homolog B (C. elegans)
1417768_at	2.13979	up	Pnpla8	patatin-like phospholipase domain containing 8
1417773_at	2.89067	up	Nans	N-acetylneuraminic acid synthase (sialic acid synthase)
1417783_at	2.82495	up	Als2	amyotrophic lateral sclerosis 2 (juvenile) homolog (human)
1417791_a_at	3.04698	up	Zfml	zinc finger
1417810_a_at	8.32246	up	Kcnb1 /// Pacsin2	potassium voltage gated channel
1417820_at	2.72685	up	Tor1b	torsin family 1
1448848_at	2.78588	up	Tor1b	torsin family 1
1448849_at	2.31482	up	Mrpl40	mitochondrial ribosomal protein L40
1417827_at	3.21825	up	Ngly1	N-glycanase 1
1448852_at	2.25661	up	Rgn	regucalcin
1417837_at	2.02517	up	Phlda2	pleckstrin homology-like domain
1417840_at	2.3488	up	1500031L02Rik	RIKEN cDNA 1500031L02 gene
1448858_at	2.80309	up	Ulk2	Unc-51 like kinase 2 (C. elegans)
1417847_at	3.59602	up	Ulk2	Unc-51 like kinase 2 (C. elegans)
1417850_at	8.88495	up	Rb1	retinoblastoma 1
1417875_at	2.95769	up	Ddx50	DEAD (Asp-Glu-Ala-Asp) box polypeptide 50
1417878_at	3.96326	up	E2f1	E2F transcription factor 1
1417884_at	2.36079	up	Slc16a6	solute carrier family 16 (monocarboxylic acid transporters)
1417901_a_at	3.25981	up	Ica1	islet cell autoantigen 1
1417911_at	3.23496	up	Ccna2	cyclin A2
1417926_at	6.74817	up	Ncapg2	non-SMC condensin II complex
1448892_at	3.46638	up	Dock7	dedicator of cytokinesis 7
1417935_at	2.31065	up	Mkrn2	makorin
1417977_at	5.82808	up	Eif4e3	eukaryotic translation initiation factor 4E member 3
1417978_at	2.16062	up	Eif4e3	eukaryotic translation initiation factor 4E member 3
1418015_at	3.91917	up	Pum2	pumilio 2 (Drosophila)
1418016_at	2.5932	up	Pum2	pumilio 2 (Drosophila)
1418017_at	3.97836	up	Pum2	pumilio 2 (Drosophila)
1418023_at	2.12321	up	Narg1	NMDA receptor-regulated gene 1
1448916_at	2.25219	up	LOC100047868 /// Mafg	similar to mafG /// v-maf musculoaponeurotic fibrosarcoma oncogene family
1418030_at	7.47429	up	Slco3a1	solute carrier organic anion transporter family
1418031_at	2.36369	up	Myo9b	myosin IXb
1418057_at	2.28079	up	Tiam1	T-cell lymphoma invasion and metastasis 1
1418070_at	2.57495	up	Cdyl	chromodomain protein
1418071_s_at	3.16272	up	Cdyl	chromodomain protein
1418079_at	3.58988	up	Psme3	proteaseome (prosome
1418090_at	2.08137	up	Plvap	plasmalemma vesicle associated protein
1418127_a_at	3.31977	up	Aifm1	apoptosis-inducing factor
1418131_at	3.42897	up	Samhd1	SAM domain and HD domain
1448968_at	2.12538	up	Ubfd1	ubiquitin family domain containing 1
1418168_at	3.62784	up	Zcchc14	zinc finger
1418170_a_at	3.54674	up	Zcchc14	zinc finger
1448993_at	6.24213	up	Atg3	autophagy-related 3 (yeast)
1418222_at	4.03375	up	2610024G14Rik	RIKEN cDNA 2610024G14 gene
1449007_at	2.97841	up	Btg3 /// EG654432 /// LOC100048453	B-cell translocation gene 3 /// predicted gene
1449008_at	9.28201	up	Tulp3	tubby-like protein 3
1449010_at	3.55226	up	Hspa4l	heat shock protein 4 like
1418258_s_at	2.0619	up	Dynll2	dynein light chain LC8-type 2
1449016_at	2.03678	up	Zp2	zona pellucida glycoprotein 2
1449023_a_at	2.30725	up	Ezh1	enhancer of zeste homolog 1 (Drosophila)
1418300_a_at	2.32422	up	Mknk2	MAP kinase-interacting serine/threonine kinase 2
1418316_a_at	2.05542	up	LOC100047588 /// Mark3	similar to MAP/microtubule affinity-regulating kinase 3 /// MAP/microtubule affinity-regulating kinase 3
1418321_at	3.12922	up	Dci	dodecenoyl-Coenzyme A delta isomerase (3
1418323_at	2.76514	up	Fem1b	feminization 1 homolog b (C. elegans)
1418324_at	7.83999	up	Fem1b	feminization 1 homolog b (C. elegans)
1418334_at	3.8233	up	Dbf4	DBF4 homolog (S. cerevisiae)
1449050_at	2.38921	up	Rfc1	replication factor C (activator 1) 1
1455446_x_at	2.08139	up	Acadsb	acyl-Coenzyme A dehydrogenase
1418355_at	2.42599	up	Nucb2	nucleobindin 2
1449056_at	45.2909	up	E330009J07Rik	RIKEN cDNA E330009J07 gene
1418365_at	2.47759	up	Ctsh	cathepsin H
1418389_at	3.31987	up	2810453I06Rik	RIKEN cDNA 2810453I06 gene
1418390_at	2.39116	up	Phf21a	PHD finger protein 21A
1418401_a_at	7.92974	up	Dusp16	dual specificity phosphatase 16
1418444_a_at	2.50496	up	Gde1	glycerophosphodiester phosphodiesterase 1
1449085_at	2.63384	up	Phf10	PHD finger protein 10
1425745_a_at	4.55515	up	Tacc2	transforming
1449086_at	3.80924	up	Rnf141	ring finger protein 141
1418483_a_at	2.35524	up	Ggta1	glycoprotein galactosyltransferase alpha 1
1418484_at	2.63714	up	Tekt2	tektin 2
1418496_at	3.22352	up	Foxa1 /// LOC100047556	forkhead box A1 /// similar to Hepatocyte nuclear factor 3-alpha (HNF-3A) (Forkhead box protein A1)
1418502_a_at	2.0608	up	Oxr1	oxidation resistance 1
1449112_at	2.48709	up	Slc27a5	solute carrier family 27 (fatty acid transporter)
1418527_a_at	3.05887	up	Fusip1	FUS interacting protein (serine-arginine rich) 1
1418531_at	10.959	up	Oosp1	oocyte secreted protein 1
1418536_at	2.8148	up	H2-Q7	histocompatibility 2
1418545_at	3.89397	up	Wasf1	WASP family 1
1449134_s_at	2.24206	up	Spic	Spi-C transcription factor (Spi-1/PU.1 related)
1449138_at	2.28872	up	Sf3b1	splicing factor 3b
1418576_at	2.2773	up	Yipf5	Yip1 domain family
1449148_a_at	2.947	up	Phtf1	putative homeodomain transcription factor 1
1418587_at	2.82844	up	Traf3	Tnf receptor-associated factor 3
1418607_at	2.33644	up	Zkscan14	zinc finger with KRAB and SCAN domains 14
1418624_at	2.04657	up	LOC100045189 /// LOC677262 /// Ybx1	similar to transcription factor EF1(A) /// similar to nuclease sensitive element binding protein 1 /// Y box protein 1
1418628_at	2.58995	up	Khdrbs1	KH domain containing
1418659_at	3.82575	up	Clock	circadian locomoter output cycles kaput
1418664_at	12.4168	up	Mpdz	multiple PDZ domain protein
1449171_at	2.04356	up	Ttk	Ttk protein kinase
1449197_at	2.33266	up	Wdr20a	WD repeat domain 20a
1418744_s_at	3.20618	up	LOC100047138 /// Tesc	similar to Tescalcin /// tescalcin
1449207_a_at	2.2182	up	Kif20a	kinesin family member 20A
1449208_at	2.29219	up	Papolb	poly (A) polymerase beta (testis specific)
1418762_at	5.12709	up	Cd55	CD55 antigen
1449217_at	3.64223	up	Casp8ap2	caspase 8 associated protein 2
1418772_at	3.61059	up	BC016423	cDNA sequence BC016423
1418787_at	3.42456	up	Mbl2	mannose-binding lectin (protein C) 2
1433733_a_at	2.78194	up	Cry1	cryptochrome 1 (photolyase-like)
1449229_a_at	3.17411	up	Cdkl2	cyclin-dependent kinase-like 2 (CDC2-related kinase)
1418801_at	2.34955	up	Zkscan1	zinc finger with KRAB and SCAN domains 1
1418847_at	3.41833	up	Arg2	arginase type II
1418882_at	6.85377	up	Nlrp5	NLR family
1418890_a_at	3.8162	up	Rab3d	RAB3D
1418895_at	5.89342	up	Skap2	src family associated phosphoprotein 2
1449263_at	2.50701	up	Ufm1	ubiquitin-fold modifier 1
1449268_at	3.78622	up	Gfpt1	glutamine fructose-6-phosphate transaminase 1
1451828_a_at	6.92284	up	Acsl4	acyl-CoA synthetase long-chain family member 4
1418919_at	2.38004	up	Sgol1	shugoshin-like 1 (S. pombe)
1418942_at	2.76254	up	Ift74	intraflagellar transport 74 homolog (Chlamydomonas)
1418963_at	2.67628	up	2310047O13Rik	RIKEN cDNA 2310047O13 gene
1418968_at	2.94165	up	Rb1cc1	RB1-inducible coiled-coil 1
1449292_at	2.41411	up	Rb1cc1	RB1-inducible coiled-coil 1
1460247_a_at	2.50213	up	Skp2	S-phase kinase-associated protein 2 (p45)
1418969_at	2.05802	up	Skp2	S-phase kinase-associated protein 2 (p45)
1419007_at	2.34677	up	Zp3	zona pellucida glycoprotein 3
1419029_at	2.92086	up	Ero1l	ERO1-like (S. cerevisiae)
1419054_a_at	2.89052	up	Ptpn21	protein tyrosine phosphatase
1419056_at	3.00997	up	Rtn2	reticulon 2 (Z-band associated protein)
1419058_at	2.13385	up	Polr1e	polymerase (RNA) I polypeptide E
1419067_a_at	3.04059	up	Rabgef1	RAB guanine nucleotide exchange factor (GEF) 1
1419068_at	2.78672	up	Rabgef1	RAB guanine nucleotide exchange factor (GEF) 1
1419076_a_at	6.50341	up	Brca2	breast cancer 2
1419078_at	2.06176	up	Nin	ninein
1419095_a_at	2.0659	up	Apom	apolipoprotein M
1419101_at	3.36621	up	Sin3a	transcriptional regulator
1449343_s_at	2.83211	up	Sin3a	transcriptional regulator
1419103_a_at	2.552	up	Abhd6	abhydrolase domain containing 6
1419104_at	4.18563	up	Abhd6	abhydrolase domain containing 6
1419108_at	2.73415	up	Ophn1	oligophrenin 1
1419111_at	2.92532	up	Ing2	inhibitor of growth family
1449348_at	4.51242	up	Mpp6	membrane protein
1419162_s_at	2.52856	up	Dnajc3	DnaJ (Hsp40) homolog
1449372_at	5.51534	up	Dnajc3	DnaJ (Hsp40) homolog
1419185_a_at	2.09429	up	Mlxipl	MLX interacting protein-like
1449390_at	2.73477	up	Gpatch4	G patch domain containing 4
1419205_x_at	2.32058	up	Gpatch4	G patch domain containing 4
1455076_a_at	5.88738	up	4933424B01Rik	RIKEN cDNA 4933424B01 gene
1419211_s_at	3.76315	up	4933424B01Rik	RIKEN cDNA 4933424B01 gene
1419246_s_at	2.11558	up	Rab14	RAB14
1419257_at	2.91996	up	Tcea1	transcription elongation factor A (SII) 1
1419264_at	2.04429	up	1200014M14Rik	RIKEN cDNA 1200014M14 gene
1419266_at	2.1259	up	Nfyb	nuclear transcription factor-Y beta
1419286_s_at	2.127	up	Ift81	intraflagellar transport 81 homolog (Chlamydomonas)
1419322_at	2.29387	up	Fgd6	FYVE
1419327_at	3.11075	up	Pdxdc1	pyridoxal-dependent decarboxylase domain containing 1
1419354_at	2.02529	up	Klf7	Kruppel-like factor 7 (ubiquitous)
1419365_at	2.46725	up	Pex11a	peroxisomal biogenesis factor 11a
1419374_at	2.94397	up	Wbp4	WW domain binding protein 4
1419460_at	2.01765	up	Rpp14	ribonuclease P 14 subunit (human)
1419484_a_at	2.78005	up	Gbas	glioblastoma amplified sequence
1431270_a_at	2.41341	up	Aste1	asteroid homolog 1 (Drosophila)
1449503_at	2.02937	up	Kpna1	karyopherin (importin) alpha 1
1419558_at	6.15718	up	Mdm4	transformed mouse 3T3 cell double minute 4
1449514_at	2.29106	up	Grk5	G protein-coupled receptor kinase 5
1419575_s_at	2.16101	up	Zfp292	zinc finger protein 292
1419588_at	3.06541	up	Spag1	sperm associated antigen 1
1449523_at	3.07548	up	Bcl7c	B-cell CLL/lymphoma 7C
1419616_at	2.58388	up	Bmpr2	bone morphogenic protein receptor
1449543_at	3.79714	up	Zscan5b	zinc finger and SCAN domain containing 5B
1419629_at	2.72608	up	Mesp2	mesoderm posterior 2
1419637_s_at	2.55042	up	4833420G17Rik	RIKEN cDNA 4833420G17 gene
1419638_at	4.15413	up	Efnb2	ephrin B2
1419639_at	2.16891	up	Efnb2	ephrin B2
1419641_at	2.83895	up	Purb	purine rich element binding protein B
1419656_at	2.71944	up	Slc25a36	solute carrier family 25
1419754_at	2.55174	up	Myo5a	myosin Va
1449589_x_at	2.04091	up	Nkap	NFKB activating protein
1449815_a_at	3.01576	up	Ssbp2	single-stranded DNA binding protein 2
1420383_a_at	2.10624	up	Col4a3bp	collagen
1420384_at	3.16794	up	Col4a3bp	collagen
1420386_at	2.66275	up	Seh1l	SEH1-like (S. cerevisiae
1449862_a_at	3.27109	up	Pi4k2b	phosphatidylinositol 4-kinase type 2 beta
1420455_at	2.75221	up	Gcm2	glial cells missing homolog 2 (Drosophila)
1420497_a_at	6.0684	up	Cebpz	CCAAT/enhancer binding protein zeta
1420509_at	3.39175	up	Srfbp1	serum response factor binding protein 1
1420522_at	2.62584	up	Ccdc50	coiled-coil domain containing 50
1460275_at	2.45763	up	Gpr3	G-protein coupled receptor 3
1449929_at	4.93193	up	Dynlt3	dynein light chain Tctex-type 3
1420617_at	2.69101	up	Cpeb4	cytoplasmic polyadenylation element binding protein 4
1420639_at	2.93395	up	Jmy	junction-mediating and regulatory protein
1420640_at	4.69085	up	Jmy	junction-mediating and regulatory protein
1449944_a_at	2.02211	up	Sec61a2	Sec61
1420719_at	4.63884	up	Tex15	testis expressed gene 15
1449962_at	3.322	up	AV320801 /// EG331529 /// OTTMUSG00000018782 /// Pramel3	expressed sequence AV320801 /// predicted gene
1420745_a_at	2.67923	up	Ccndbp1	cyclin D-type binding-protein 1
1420766_at	2.04582	up	Socs7	suppressor of cytokine signaling 7
1420773_at	4.98285	up	Dub1	deubiquitinating enzyme 1
1450004_at	2.50149	up	Tslp	thymic stromal lymphopoietin
1420840_at	3.6865	up	Plekha3	pleckstrin homology domain-containing
1450024_at	2.05222	up	Sufu	suppressor of fused homolog (Drosophila)
1420850_at	2.77962	up	Crnkl1	Crn
1450026_a_at	5.39326	up	B3gnt2	UDP-GlcNAc:betaGal beta-1
1420870_at	2.67343	up	Mllt10	myeloid/lymphoid or mixed-lineage leukemia (trithorax homolog
1420890_at	2.10507	up	Hccs	holocytochrome c synthetase
1420897_at	2.5726	up	Snap23	synaptosomal-associated protein 23
1420916_at	2.09929	up	Prpf40a	PRP40 pre-mRNA processing factor 40 homolog A (yeast)
1420922_at	2.08805	up	Usp9x	ubiquitin specific peptidase 9
1420925_at	2.61057	up	Tub	tubby candidate gene
1420928_at	2.77902	up	St6gal1	beta galactoside alpha 2
1450053_at	6.82396	up	Kif2a	Kinesin family member 2A
1420956_at	6.41962	up	Apc	adenomatosis polyposis coli
1420967_at	4.89968	up	Slc25a15	solute carrier family 25 (mitochondrial carrier ornithine transporter)
1450064_at	3.25076	up	Fmn2 /// LOC100044570	formin 2 /// similar to formin-2
1450070_s_at	17.8668	up	Pak1	p21 (CDKN1A)-activated kinase 1
1452156_a_at	5.5779	up	Nisch	nischarin
1425862_a_at	2.46818	up	Pik3c2a	phosphatidylinositol 3-kinase
1421023_at	2.17449	up	Pik3c2a	phosphatidylinositol 3-kinase
1450105_at	2.19095	up	Adam10	a disintegrin and metallopeptidase domain 10
1421065_at	23.4121	up	Jak2	Janus kinase 2
1421066_at	12.1053	up	Jak2	Janus kinase 2
1421108_at	2.76175	up	Cml2	camello-like 2
1421117_at	4.81391	up	Dst	dystonin
1421122_at	2.59183	up	Cbll1	Casitas B-lineage lymphoma-like 1
1423331_a_at	2.86802	up	LOC100047693 /// Pvrl3	similar to cell adhesion molecule nectin-3 beta /// poliovirus receptor-related 3
1450129_a_at	3.44081	up	Socs6	suppressor of cytokine signaling 6
1421148_a_at	4.47723	up	Tial1	Tia1 cytotoxic granule-associated RNA binding protein-like 1
1421158_at	2.1015	up	Cgnl1	cingulin-like 1
1427699_a_at	2.53153	up	Ptpn11	protein tyrosine phosphatase
1450157_a_at	4.83188	up	Hmmr	hyaluronan mediated motility receptor (RHAMM)
1421240_at	2.12526	up	Ern1	endoplasmic reticulum (ER) to nucleus signalling 1
1450178_at	5.57326	up	Brdt	bromodomain
1421268_at	2.97146	up	Ugcg	UDP-glucose ceramide glucosyltransferase
1421269_at	3.25334	up	Ugcg	UDP-glucose ceramide glucosyltransferase
1421273_at	2.0633	up	Socs4	suppressor of cytokine signaling 4
1435737_a_at	2.54269	up	Nde1	nuclear distribution gene E homolog 1 (A nidulans)
1450229_at	2.48944	up	Med14	mediator complex subunit 14
1421389_a_at	3.23903	up	Eif2ak4	eukaryotic translation initiation factor 2 alpha kinase 4
1421392_a_at	3.54551	up	Birc3	baculoviral IAP repeat-containing 3
1450231_a_at	2.32709	up	Xiap	X-linked inhibitor of apoptosis
1426709_a_at	2.93066	up	Usp33	ubiquitin specific peptidase 33
1421479_at	2.13155	up	Zfp318	zinc finger protein 318
1421519_a_at	2.19444	up	1200003I07Rik /// Zfp120	RIKEN cDNA 1200003I07 gene /// zinc finger protein 120
1450306_at	2.3243	up	Zp1	zona pellucida glycoprotein 1
1426404_a_at	4.49829	up	Rnf11	ring finger protein 11
1452298_a_at	4.70116	up	Myo5b	myosin Vb
1421720_a_at	4.87374	up	Dtx2	deltex 2 homolog (Drosophila)
1427708_a_at	3.78667	up	Nf2	neurofibromatosis 2
1450382_at	2.07082	up	Nf2	neurofibromatosis 2
1421823_a_at	2.55422	up	LOC100044385 /// Ppp2cb	similar to protein phosphatase 2a
1450386_at	4.41925	up	Kpna3	karyopherin (importin) alpha 3
1450394_at	2.60101	up	Golph3	golgi phosphoprotein 3
1450396_at	2.11383	up	Stag2	stromal antigen 2
1421870_at	6.08981	up	Trim44	tripartite motif-containing 44
1421877_at	3.14943	up	Mapk9	mitogen-activated protein kinase 9
1421882_a_at	15.666	up	Elavl2	ELAV (embryonic lethal
1421883_at	39.0846	up	Elavl2	ELAV (embryonic lethal
1421884_at	2.28342	up	Sos1	Son of sevenless homolog 1 (Drosophila)
1421889_a_at	4.52881	up	Aplp2	amyloid beta (A4) precursor-like protein 2
1450400_at	2.77326	up	Tgs1	trimethylguanosine synthase homolog (S. cerevisiae)
1421910_at	2.9828	up	Tcf20	transcription factor 20
1421968_a_at	2.46001	up	Nipa2	non imprinted in Prader-Willi/Angelman syndrome 2 homolog (human)
1421982_a_at	4.93843	up	Unc50	unc-50 homolog (C. elegans)
1421998_at	2.40044	up	LOC100047963 /// Tor3a	similar to ADIR1 /// torsin family 3
1429456_a_at	3.01033	up	Polr3e	polymerase (RNA) III (DNA directed) polypeptide E
1422021_at	4.53522	up	Spry4	sprouty homolog 4 (Drosophila)
1422036_at	2.55469	up	Strn	striatin
1422080_at	2.36331	up	Il7	interleukin 7
1450500_at	5.46123	up	LOC677213	similar to U2AF homology motif (UHM) kinase 1
1422252_a_at	4.86136	up	Cdc25c	cell division cycle 25 homolog C (S. pombe)
1422429_at	4.08457	up	Rnf14	ring finger protein 14
1422449_s_at	2.23238	up	Rcn2	reticulocalbin 2
1422458_at	2.89298	up	Tcl1	T-cell lymphoma breakpoint 1
1422477_at	2.43377	up	Cables1	CDK5 and Abl enzyme substrate 1
1422489_at	2.95694	up	Gcs1	glucosidase 1
1422491_a_at	3.12763	up	Bnip2	BCL2/adenovirus E1B interacting protein 2
1422497_at	3.21188	up	Slc30a5	solute carrier family 30 (zinc transporter)
1422510_at	2.12337	up	Ctdspl	CTD (carboxy-terminal domain
1422535_at	3.05992	up	Ccne2	cyclin E2
1450653_at	19.7472	up	Spz1	spermatogenic leucine zipper 1
1422553_at	5.70375	up	Pten	phosphatase and tensin homolog
1422573_at	5.63411	up	Ampd3	adenosine monophosphate deaminase 3
1450665_at	2.6392	up	Gabpa	GA repeat binding protein
1450667_a_at	2.03357	up	Cs	citrate synthase
1422591_at	2.17305	up	Tceb3	transcription elongation factor B (SIII)
1422593_at	2.12407	up	Ap3s1	adaptor-related protein complex 3
1450685_at	2.68891	up	Arpp19	cAMP-regulated phosphoprotein 19
1422610_s_at	5.20626	up	Igf2bp3	insulin-like growth factor 2 mRNA binding protein 3
1450687_at	3.57297	up	Igf2bp3	insulin-like growth factor 2 mRNA binding protein 3
1422611_s_at	3.00438	up	Igf2bp3	insulin-like growth factor 2 mRNA binding protein 3
1422621_at	2.71351	up	Ranbp2	RAN binding protein 2
1422638_s_at	5.32793	up	Rassf5	Ras association (RalGDS/AF-6) domain family member 5
1422669_at	2.1392	up	Ebag9	estrogen receptor-binding fragment-associated gene 9
1422673_at	6.58446	up	Prkd1	protein kinase D1
1425405_a_at	2.04521	up	Adar	adenosine deaminase
1422710_a_at	2.95464	up	Cacna1h	calcium channel
1422730_at	2.89154	up	Limd1	LIM domains containing 1
1422731_at	5.05743	up	Limd1	LIM domains containing 1
1422736_at	2.46098	up	LOC100045146 /// Ranbp9	similar to B cell antigen receptor Ig beta associated protein 1 /// RAN binding protein 9
1450730_at	2.29508	up	Hs2st1	heparan sulfate 2-O-sulfotransferase 1
1450732_a_at	2.38583	up	Bicd2	bicaudal D homolog 2 (Drosophila)
1450735_at	2.70623	up	Pno1	partner of NOB1 homolog (S. cerevisiae)
1422768_at	2.24396	up	Syncrip	synaptotagmin binding
1450744_at	2.9728	up	Ell2	elongation factor RNA polymerase II 2
1450745_at	2.46622	up	C1galt1	core 1 synthase
1422778_at	3.94854	up	Taf9	TAF9 RNA polymerase II
1422785_at	7.0381	up	Rasa2	RAS p21 protein activator 2
1422794_at	3.61701	up	Cul3	cullin 3
1450759_at	5.45542	up	Bmp6	bone morphogenetic protein 6
1422814_at	2.71138	up	Aspm	asp (abnormal spindle)-like
1422823_at	6.94758	up	Eps8 /// LOC632638	epidermal growth factor receptor pathway substrate 8 /// similar to Epidermal growth factor receptor kinase substrate 8
1422824_s_at	7.73684	up	Eps8	epidermal growth factor receptor pathway substrate 8
1422836_at	2.12125	up	Mbnl3	muscleblind-like 3 (Drosophila)
1450778_a_at	2.96323	up	Phax	phosphorylated adaptor for RNA export
1422845_at	2.75916	up	Canx	calnexin
1422847_a_at	3.26932	up	Prkcd	protein kinase C
1422848_a_at	2.40137	up	Pabpn1	poly(A) binding protein
1422850_at	2.09072	up	Pabpn1	poly(A) binding protein
1422885_at	2.37797	up	Snrpd3	small nuclear ribonucleoprotein D3
1422893_at	3.89627	up	Sfmbt1	Scm-like with four mbt domains 1
1422900_at	2.33262	up	Mgea5	meningioma expressed antigen 5 (hyaluronidase)
1422910_s_at	4.08403	up	Smc6	structural maintenance of chromosomes 6
1422933_at	2.93734	up	Xlr5a /// Xlr5b /// Xlr5c	X-linked lymphocyte-regulated 5A /// X-linked lymphocyte-regulated 5B /// X-linked lymphocyte-regulated 5C
1422966_a_at	3.61338	up	Tfrc	transferrin receptor
1422979_at	2.14234	up	Suv39h2	suppressor of variegation 3-9 homolog 2 (Drosophila)
1422993_s_at	2.41667	up	Refbp2 /// Thoc4	RNA and export factor binding protein 2 /// THO complex 4
1423000_a_at	4.82979	up	Dgke	diacylglycerol kinase
1450845_a_at	2.86037	up	Bzw1	basic leucine zipper and W2 domains 1
1423040_at	3.23321	up	Bzw1	basic leucine zipper and W2 domains 1
1423045_at	2.50882	up	Ncbp2	nuclear cap binding protein subunit 2
1423059_at	3.95742	up	Ptk2	PTK2 protein tyrosine kinase 2
1423073_at	2.61746	up	Cmpk1	cytidine monophosphate (UMP-CMP) kinase 1
1423076_at	9.22724	up	Snx9	sorting nexin 9
1423102_a_at	2.76933	up	Rnf10	ring finger protein 10
1423118_at	2.81016	up	1200014J11Rik	RIKEN cDNA 1200014J11 gene
1423126_at	3.36837	up	Atp1b3	ATPase
1423131_at	2.39642	up	100042660 /// 5730427N09Rik /// 675063 /// EG239338 /// EG433230 /// EG547215 /// EG623804 /// EG627895 /// EG629436 /// EG665356 /// EG666180 /// EG677785 /// LOC636306 /// OTTMUSG00000024175	predicted gene
1423134_at	4.50524	up	Rilpl2	Rab interacting lysosomal protein-like 2
1423136_at	2.56644	up	Fgf1	fibroblast growth factor 1
1450870_at	4.07734	up	Rala	v-ral simian leukemia viral oncogene homolog A (ras related)
1423144_at	2.30306	up	Pik3ca	phosphatidylinositol 3-kinase
1450886_at	5.02861	up	Gsg2	germ cell-specific gene 2
1450890_a_at	2.28276	up	Abi1	abl-interactor 1
1423177_a_at	2.15455	up	Abi1	abl-interactor 1
1423185_a_at	2.39842	up	Ubap1	ubiquitin-associated protein 1
1423186_at	7.6956	up	Tiam2	T-cell lymphoma invasion and metastasis 2
1450898_at	2.28737	up	Hiat1	hippocampus abundant gene transcript 1
1423195_at	2.93041	up	Hiat1	hippocampus abundant gene transcript 1
1423196_at	2.10513	up	Nedd1	neural precursor cell expressed
1450900_at	3.01623	up	Smek2	SMEK homolog 2
1423199_at	2.01302	up	Brd3	bromodomain containing 3
1450905_at	3.98819	up	Plxnc1	plexin C1
1450908_at	2.05704	up	Eif4e	eukaryotic translation initiation factor 4E
1423228_at	4.92979	up	B4galt6 /// LOC675709	UDP-Gal:betaGlcNAc beta 1
1460329_at	3.52835	up	B4galt6 /// LOC675709	UDP-Gal:betaGlcNAc beta 1
1423234_at	2.16638	up	Psmd5	proteasome (prosome
1423237_at	2.84423	up	Galnt1	UDP-N-acetyl-alpha-D-galactosamine:polypeptide N-acetylgalactosaminyltransferase 1
1450917_at	4.40414	up	Myom2	myomesin 2
1423248_at	2.02957	up	Nktr	natural killer tumor recognition sequence
1450922_a_at	2.04846	up	Tgfb2	transforming growth factor
1450923_at	2.83217	up	Tgfb2	transforming growth factor
1431951_a_at	3.93601	up	Usp16	ubiquitin specific peptidase 16
1423265_at	2.64528	up	Minpp1	multiple inositol polyphosphate histidine phosphatase 1
1450932_s_at	2.74587	up	Dock9	dedicator of cytokinesis 9
1423304_a_at	2.60575	up	Rnf111	ring finger 111
1423309_at	2.25206	up	Tgoln1	trans-golgi network protein
1423324_at	7.35031	up	Pnn	pinin
1423328_at	42.007	up	Gdap1	ganglioside-induced differentiation-associated-protein 1
1450940_at	20.2007	up	Gdap1	ganglioside-induced differentiation-associated-protein 1
1423350_at	2.1779	up	Socs5	suppressor of cytokine signaling 5
1450949_at	3.3474	up	Katna1	katanin p60 (ATPase-containing) subunit A1
1423361_at	4.09274	up	Yme1l1	YME1-like 1 (S. cerevisiae)
1423371_at	3.19708	up	Pole4	polymerase (DNA-directed)
1423374_at	5.37981	up	Ncoa6	nuclear receptor coactivator 6
1423382_a_at	2.28312	up	Hnrnpf /// OTTMUSG00000004294	heterogeneous nuclear ribonucleoprotein F /// predicted gene
1450963_at	2.23473	up	Hnrnpf	heterogeneous nuclear ribonucleoprotein F
1460333_at	3.10387	up	Ddx59	DEAD (Asp-Glu-Ala-Asp) box polypeptide 59
1423403_at	2.65758	up	Mapkbp1	mitogen-activated protein kinase binding protein 1
1450973_s_at	2.90194	up	Mapkbp1	mitogen-activated protein kinase binding protein 1
1450983_at	2.74834	up	Akap8	A kinase (PRKA) anchor protein 8
1423441_at	2.6056	up	Tfb2m	transcription factor B2
1423442_a_at	2.58565	up	Fbxw2	F-box and WD-40 domain protein 2
1450994_at	7.76746	up	Rock1	Rho-associated coiled-coil containing protein kinase 1
1423444_at	7.1725	up	Rock1	Rho-associated coiled-coil containing protein kinase 1
1423445_at	6.01348	up	Rock1	Rho-associated coiled-coil containing protein kinase 1
1423447_at	2.29011	up	Clpx	caseinolytic peptidase X (E.coli)
1423462_at	2.05251	up	Map3k7ip2	mitogen-activated protein kinase kinase kinase 7 interacting protein 2
1423470_at	4.72627	up	Ptbp2	polypyrimidine tract binding protein 2
1423475_at	3.56614	up	Cnnm2	cyclin M2
1423484_at	2.0681	up	4930533K18Rik /// Bicc1	RIKEN cDNA 4930533K18 gene /// bicaudal C homolog 1 (Drosophila)
1423512_at	3.99656	up	AW209491	expressed sequence AW209491
1460337_at	2.55139	up	Sh3kbp1	SH3-domain kinase binding protein 1
1423533_a_at	3.12157	up	Rhot1	ras homolog gene family
1451020_at	3.5483	up	Gsk3b	glycogen synthase kinase 3 beta
1460338_a_at	2.2432	up	Crlf3	cytokine receptor-like factor 3
1451039_at	2.01023	up	2610027L16Rik	RIKEN cDNA 2610027L16 gene
1451042_a_at	2.24544	up	Mina	myc induced nuclear antigen
1423605_a_at	3.66592	up	Mdm2	transformed mouse 3T3 cell double minute 2
1423613_at	2.37473	up	Ssfa2	sperm specific antigen 2
1423622_a_at	2.48899	up	Ccnl1	cyclin L1
1423649_at	2.98324	up	Tmem68	transmembrane protein 68
1454036_a_at	2.44962	up	Usp15	ubiquitin specific peptidase 15
1423672_at	4.21162	up	Ttc30b	tetratricopeptide repeat domain 30B
1451080_at	2.45699	up	Usp1	ubiquitin specific peptdiase 1
1423675_at	4.84429	up	Usp1	ubiquitin specific peptdiase 1
1460342_s_at	3.43676	up	Mprip	myosin phosphatase Rho interacting protein
1423711_at	3.37371	up	Ndufaf1	NADH dehydrogenase (ubiquinone) 1 alpha subcomplex
1423735_a_at	2.94994	up	Wdr36	WD repeat domain 36
1451087_at	2.80794	up	Wdr36	WD repeat domain 36
1423740_a_at	3.15072	up	Rbm10	RNA binding motif protein 10
1423741_at	5.97515	up	Rbm10	RNA binding motif protein 10
1423747_a_at	19.4131	up	Pdk1	pyruvate dehydrogenase kinase
1423748_at	3.67055	up	Pdk1	pyruvate dehydrogenase kinase
1451100_a_at	2.19428	up	Cdv3	carnitine deficiency-associated gene expressed in ventricle 3
1451102_at	5.11283	up	Cnot8	CCR4-NOT transcription complex
1423773_at	6.94576	up	Gpbp1	GC-rich promoter binding protein 1
1451108_at	2.60325	up	Rnf185	ring finger protein 185
1451109_a_at	2.14453	up	Nedd4	neural precursor cell expressed
1451125_at	2.01937	up	Paip2b	poly(A) binding protein interacting protein 2B
1423809_at	4.76452	up	Tcf19	transcription factor 19
1423813_at	2.59655	up	Kif22	kinesin family member 22
1451128_s_at	3.22972	up	Kif22	kinesin family member 22
1449628_s_at	2.86351	up	Stard7	START domain containing 7
1423847_at	2.10031	up	Ncapd2	non-SMC condensin I complex
1423848_at	3.39616	up	Mphosph6	M phase phosphoprotein 6
1423870_at	2.90247	up	Aida	axin interactor
1453554_a_at	2.25946	up	Wdr33	WD repeat domain 33
1423879_at	4.49321	up	D030056L22Rik	RIKEN cDNA D030056L22 gene
1423882_at	2.30222	up	Rfwd3	ring finger and WD repeat domain 3
1423883_at	2.0959	up	Acsl1	acyl-CoA synthetase long-chain family member 1
1423895_a_at	2.33867	up	Cugbp2	CUG triplet repeat
1423919_at	2.87389	up	BC023882	cDNA sequence BC023882
1423922_s_at	2.90657	up	Ints3	integrator complex subunit 3
1451177_at	2.80273	up	Dnajb4	DnaJ (Hsp40) homolog
1451188_at	3.95422	up	LOC100045629 /// Wdr26	similar to myocardial ischemic preconditioning upregulated protein 2 /// WD repeat domain 26
1423961_at	2.05068	up	Wdr26	WD repeat domain 26
1423976_at	5.19441	up	4930453N24Rik	RIKEN cDNA 4930453N24 gene
1423994_at	2.62347	up	Kif1b	kinesin family member 1B
1427396_a_at	2.13581	up	Csde1	cold shock domain containing E1
1424005_at	3.66289	up	B230219D22Rik	RIKEN cDNA B230219D22 gene
1424011_at	2.45736	up	Aqp9	aquaporin 9
1451208_at	3.12607	up	Etf1	eukaryotic translation termination factor 1
1424049_at	2.17068	up	Lrrc42	leucine rich repeat containing 42
1451220_at	5.82938	up	Wdr20a	WD repeat domain 20a
1451221_at	4.85178	up	BC018507	cDNA sequence BC018507
1424071_s_at	3.48448	up	BC018507	cDNA sequence BC018507
1424072_at	8.04053	up	2010107G23Rik	RIKEN cDNA 2010107G23 gene
1451225_at	4.43565	up	Ptpn11	protein tyrosine phosphatase
1451227_a_at	3.47419	up	Slc10a3	solute carrier family 10 (sodium/bile acid cotransporter family)
1424092_at	3.00842	up	Epb4.1	erythrocyte protein band 4.1
1424107_at	2.80143	up	Kif18a	kinesin family member 18A
1424118_a_at	3.99734	up	Spc25	SPC25
1424134_at	3.34104	up	Rspry1	ring finger and SPRY domain containing 1
1424135_at	5.71081	up	Rspry1	ring finger and SPRY domain containing 1
1424161_at	2.44018	up	Ddx27	DEAD (Asp-Glu-Ala-Asp) box polypeptide 27
1424198_at	2.09042	up	Dlg5	discs
1424201_a_at	2.22948	up	Seh1l	SEH1-like (S. cerevisiae
1424206_at	2.49763	up	Smarca5	SWI/SNF related
1424207_at	2.20575	up	Smarca5	SWI/SNF related
1424208_at	3.65304	up	Ptger4	prostaglandin E receptor 4 (subtype EP4)
1424213_at	2.84562	up	Ubiad1	UbiA prenyltransferase domain containing 1
1424217_at	2.57812	up	Papola	poly (A) polymerase alpha
1424229_at	2.22974	up	Dyrk3	dual-specificity tyrosine-(Y)-phosphorylation regulated kinase 3
1424237_at	6.35287	up	Zfp639	zinc finger protein 639
1424244_at	4.00559	up	Rwdd4a	RWD domain containing 4A
1424274_at	2.5973	up	Uso1	USO1 homolog
1424280_at	2.68194	up	Mospd1	motile sperm domain containing 1
1424288_at	2.15603	up	Mepce	methylphosphate capping enzyme
1424289_at	2.09793	up	Osgin2	oxidative stress induced growth inhibitor family member 2
1451306_at	2.26128	up	Cdca7l	cell division cycle associated 7 like
1424303_at	3.59135	up	Depdc7	DEP domain containing 7
1424315_at	3.14417	up	1110004E09Rik	RIKEN cDNA 1110004E09 gene
1424319_at	2.15084	up	Oraov1	oral cancer overexpressed 1
1424324_at	9.72749	up	Esco1	establishment of cohesion 1 homolog 1 (S. cerevisiae)
1424333_at	2.34177	up	Rg9mtd1	RNA (guanine-9-) methyltransferase domain containing 1
1424342_at	2.20346	up	Fyttd1	forty-two-three domain containing 1
1424368_s_at	2.0691	up	Ubqln1	ubiquilin 1
1424404_at	2.09411	up	0610040J01Rik	RIKEN cDNA 0610040J01 gene
1424406_at	2.74286	up	Bcl2l13	BCL2-like 13 (apoptosis facilitator)
1424418_at	2.22186	up	Slc25a38	solute carrier family 25
1424452_at	2.42238	up	Sltm	SAFB-like
1424463_at	7.09211	up	Mfsd6	major facilitator superfamily domain containing 6
1451361_a_at	2.11838	up	Pnpla7	patatin-like phospholipase domain containing 7
1424478_at	2.05196	up	Bbs2	Bardet-Biedl syndrome 2 (human)
1424481_s_at	2.53969	up	Armcx5	armadillo repeat containing
1424482_at	2.9383	up	Arhgef7	Rho guanine nucleotide exchange factor (GEF7)
1451376_at	3.99749	up	Atl3	atlastin GTPase 3
1424515_at	2.26429	up	B230354K17Rik	RIKEN cDNA B230354K17 gene
1424516_at	4.7356	up	B230354K17Rik	RIKEN cDNA B230354K17 gene
1424526_a_at	7.52488	up	Tgds	TDP-glucose 4
1424569_at	2.67653	up	Ddx46	DEAD (Asp-Glu-Ala-Asp) box polypeptide 46
1424585_at	2.45969	up	Ranbp10	RAN binding protein 10
1424586_at	2.92685	up	Ehbp1	EH domain binding protein 1
1424589_s_at	4.10371	up	Rnpc3	RNA-binding region (RNP1
1424591_at	2.76571	up	5830433M19Rik	RIKEN cDNA 5830433M19 gene
1424604_s_at	2.16157	up	Sumf1	sulfatase modifying factor 1
1424607_a_at	4.06356	up	100039204 /// 100040620 /// 100040790 /// 100041416 /// 100042151 /// 100043211 /// 100043316 /// Cwc22 /// LOC100047648 /// OTTMUSG00000017752	predicted gene
1424609_a_at	4.02162	up	100039204 /// 100040620 /// 100040790 /// 100041416 /// 100042151 /// 100043211 /// 100043316 /// Cwc22 /// LOC100046838 /// LOC100047648 /// OTTMUSG00000017752	predicted gene
1424610_at	2.70152	up	Trub2	TruB pseudouridine (psi) synthase homolog 2 (E. coli)
1424611_x_at	3.0241	up	Trub2	TruB pseudouridine (psi) synthase homolog 2 (E. coli)
1424616_s_at	2.93949	up	Frag1	FGF receptor activating protein 1
1424632_a_at	2.61095	up	Rev3l	REV3-like
1426015_s_at	2.11546	up	Asph	aspartate-beta-hydroxylase
1424642_at	2.199	up	Thoc1	THO complex 1
1424657_at	2.25984	up	Taok1	TAO kinase 1
1424658_at	2.26367	up	Taok1	TAO kinase 1
1424663_at	2.42787	up	BC017647	cDNA sequence BC017647
1451436_at	3.92512	up	Sbno1	sno
1424674_at	5.96685	up	Slc39a6	solute carrier family 39 (metal ion transporter)
1451439_at	2.18451	up	BC027231	cDNA sequence BC027231
1451446_at	3.65207	up	Antxr1	anthrax toxin receptor 1
1424706_at	2.82631	up	LOC100044272 /// Zfp51	hypothetical protein LOC100044272 /// zinc finger protein 51
1424712_at	3.06201	up	Ahctf1	AT hook containing transcription factor 1
1424717_at	5.48193	up	Mis12	MIS12 homolog (yeast)
1424724_a_at	7.4418	up	D16Ertd472e	DNA segment
1424750_at	2.59176	up	Zbtb1	zinc finger and BTB domain containing 1
1424766_at	2.5306	up	Ercc6l	excision repair cross-complementing rodent repair deficiency complementation group 6 - like
1451469_at	4.15277	up	Cntln	centlein
1424776_a_at	2.68561	up	Slc25a28	solute carrier family 25
1424803_at	3.99204	up	BC020002	cDNA sequence BC020002
1424804_at	5.7149	up	BC020002	cDNA sequence BC020002
1424810_at	2.97685	up	Tasp1	taspase
1431890_a_at	2.1996	up	Mllt3	myeloid/lymphoid or mixed-lineage leukemia (trithorax homolog
1424824_at	24.4143	up	Slain1	SLAIN motif family
1451508_at	3.28835	up	Larp2	La ribonucleoprotein domain family
1451509_at	2.68971	up	Taf9	TAF9 RNA polymerase II
1451510_s_at	6.96752	up	Olah	oleoyl-ACP hydrolase
1424858_at	2.24999	up	L2hgdh	L-2-hydroxyglutarate dehydrogenase
1424873_at	2.40699	up	Rnf2	ring finger protein 2
1451525_at	5.61184	up	Arhgap12	Rho GTPase activating protein 12
1424890_at	8.2083	up	Bnc1	basonuclin 1
1453915_a_at	2.22324	up	Slc37a3	solute carrier family 37 (glycerol-3-phosphate transporter)
1424924_at	3.6388	up	Sec63	SEC63-like (S. cerevisiae)
1419819_s_at	4.37965	up	Sec63	SEC63-like (S. cerevisiae)
1451545_at	2.45319	up	Tdrd3	tudor domain containing 3
[truncated: 603 more rows]

## Sheet: mouse 8vM
The regulated genes from 8-cell stage to Morula of mouse
Probe Set ID	Fold change([8] vs [M])	Regulation([8] vs [M])	Gene Symbol	Gene Title
AFFX-BioB-5_at	12.3085	down
AFFX-BioB-M_at	11.2718	down
AFFX-BioB-3_at	12.2274	down
AFFX-BioC-5_at	9.76523	down
AFFX-BioC-3_at	9.42544	down
AFFX-BioDn-5_at	9.93464	down
AFFX-BioDn-3_at	5.19465	down
AFFX-CreX-5_at	2.82958	down
AFFX-CreX-3_at	2.59529	down
AFFX-r2-Ec-bioB-5_at	12.1921	down
AFFX-r2-Ec-bioB-M_at	9.16018	down
AFFX-r2-Ec-bioB-3_at	11.3904	down
AFFX-r2-Ec-bioC-5_at	8.40277	down
AFFX-r2-Ec-bioC-3_at	7.37639	down
AFFX-r2-Ec-bioD-5_at	5.07889	down
AFFX-r2-Ec-bioD-3_at	4.5778	down
AFFX-r2-P1-cre-3_at	2.17127	down
AFFX-GapdhMur/M32599_5_at	2.4982	down	Gapdh	glyceraldehyde-3-phosphate dehydrogenase
AFFX-GapdhMur/M32599_3_at	3.27278	down	Gapdh	glyceraldehyde-3-phosphate dehydrogenase
1460639_a_at	5.58887	down	Atox1	ATX1 (antioxidant protein 1) homolog 1 (yeast)
1460647_a_at	2.89413	down	Nr2f6	nuclear receptor subfamily 2
1415698_at	2.43098	down	Golm1	golgi membrane protein 1
1460675_at	2.28673	down	Igsf8	immunoglobulin superfamily
1415764_at	2.31417	down	Zc3h11a	zinc finger CCCH type containing 11A
1448104_at	6.05893	down	Aldh6a1	aldehyde dehydrogenase family 6
1415834_at	2.3105	down	Dusp6	dual specificity phosphatase 6
1415837_at	2.45932	down	Klk1	kallikrein 1
1448111_at	2.21825	down	Ctps2	cytidine 5'-triphosphate synthase 2
1448123_s_at	3.54718	down	Tgfbi	transforming growth factor
[truncated: 3,371 more rows]

## Sheet: mouse MvB
The regulated genes from Morula to Blastocyst of mouse
[truncated: 1,935 more rows]
